# Supplementary material for: Functional proximity mapping of RNA binding proteins uncovers a mitochondrial mRNA anchor that promotes stress recovery
Source: Research Square preprint supplement (doi:10.21203/rs.3.rs-103196/v1), 2020-11-12
Supplement: Supplementary file 1 [file 31fc01dedeb0a79fb80867bb.xlsx]

## Sheet: Tab 1. Nuclear RBPome
Uniprot accession	Gene symbol	Protein name	GO molecular function	GO cellular component	OOPS (Queiroz, R.M.L., et al. Nat. Biotech. 2019.)	OligodT pulldown (Queiroz, RML., et al Nat. Biotech. 2019)	XRANX (Trendel J.,et al. Cell. 2019)	OligodT Pulldown (Baltz AG.,et al. Mol Cell.2012)	CARIC (Huang R.,et al. PNAS.2019)	GO RNA binding	SerIC nucleus (Conrad T., et al. Nat. Commun. 2016)	RBD map (Castello A., et al. Mol Cell. 2016)	OligodT Pulldown (Castello A., et al. Cell. 2012)	OligodT Pulldown (Milek M, et al. Genome Res. 2017)	known RBP	polyA RBP	RNA types	Ratio (+FA vs -FA), log2	RNA binding affinity	Domain 1	Domain 2	Domain 3	Domain 4	Domain 5	Domain 6	Domain 7	Domain 8
O43719	Htatsf1	HIV Tat-specific factor 1	nucleotide binding|poly(A) RNA binding|	nucleus|nucleoplasm|	1	0	1	0	0	1	0	0	1	0	Known	polyA	polyA	0.859667	High	RRM_1	RRM_1	N/A	N/A	N/A	N/A	N/A	N/A
Q75N03	Cbll1	E3 ubiquitin-protein ligase Hakai	ubiquitin-protein transferase activity|protein binding|zinc ion binding|ligase activity|identical protein binding|ubiquitin protein ligase activity|	ubiquitin ligase complex|	0	0	0	0	0	0	0	0	0	0	Orphan	Non-polyA	N/A	1.007	High	zf_Hakai	N/A	N/A	N/A	N/A	N/A	N/A	N/A
P23246	Sfpq	Splicing factor, proline- and glutamine-rich	nucleotide binding|transcription regulatory region sequence-specific DNA binding|RNA polymerase II distal enhancer sequence-specific DNA binding|core promoter binding|chromatin binding|protein binding|histone deacetylase binding|transcription regulatory region DNA binding|poly(A) RNA binding|	chromatin|nucleus|nucleoplasm|cytoplasm|nuclear matrix|paraspeckles|RNA polymerase II transcription factor complex|	1	1	1	1	1	1	1	1	1	1	Known	polyA	polyA	1.23433	High	RRM_1	RRM_6	N/A	N/A	N/A	N/A	N/A	N/A
Q8WXF1	Pspc1	Paraspeckle component 1	nucleotide binding|core promoter binding|protein binding|poly(A) RNA binding|	nucleoplasm|nucleolus|cytoplasm|nuclear matrix|nuclear speck|paraspeckles|	1	1	1	1	1	1	1	1	1	1	Known	polyA	polyA	1.249	High	RRM_1*2	NOPS	N/A	N/A	N/A	N/A	N/A	N/A
P49750-4	Ylpm1	Isoform 4 of YLP motif-containing protein 1	RNA polymerase II core promoter proximal region sequence-specific DNA binding transcription factor activity involved in negative regulation of transcription|protein binding|poly(A) RNA binding|	nucleus|nucleoplasm|cytoplasm|nuclear speck|	1	0	1	1	0	0	1	0	0	1	Known	polyA	polyA	1.25	High	N/A	N/A	N/A	N/A	N/A	N/A	N/A	N/A
P98179	Rbm3	RNA-binding protein 3	nucleotide binding|RNA binding|protein binding|ribosomal large subunit binding|poly(A) RNA binding|	nucleus|cytoplasm|dendrite|large ribosomal subunit|	1	1	1	1	1	1	1	1	1	1	Known	polyA	polyA	1.28133	High	RRM_1	N/A	N/A	N/A	N/A	N/A	N/A	N/A
P38159	Rbmx	RNA-binding motif protein, X chromosome	nucleotide binding|core promoter binding|chromatin binding|RNA binding|single-stranded RNA binding|mRNA binding|protein binding|poly(A) RNA binding|	extracellular space|nucleus|nucleoplasm|nuclear euchromatin|membrane|ribonucleoprotein complex|supraspliceosomal complex|extracellular exosome|catalytic step 2 spliceosome|	1	1	1	1	1	1	1	1	1	1	Known	polyA	polyA	1.289	High	RRM_1	RBM1CTR	N/A	N/A	N/A	N/A	N/A	N/A
Q96PK6	Rbm14	RNA-binding protein 14	nucleotide binding|RNA polymerase II transcription cofactor activity|RNA binding|protein binding|ligand-dependent nuclear receptor transcription coactivator activity|protein binding, bridging|poly(A) RNA binding|	nucleoplasm|transcription factor complex|nucleolus|mediator complex|ribonucleoprotein complex|	1	1	1	1	1	1	1	1	1	1	Known	polyA	polyA	1.29367	High	RRM_1*2	N/A	N/A	N/A	N/A	N/A	N/A	N/A
Q9HCD5	Ncoa5	Nuclear receptor coactivator 5	chromatin binding|protein binding|poly(A) RNA binding|	extracellular space|nucleus|nucleoplasm|actin cytoskeleton|	1	0	0	1	0	0	0	0	0	0	Known	polyA	polyA	1.296	High	N/A	N/A	N/A	N/A	N/A	N/A	N/A	N/A
Q969T9	Wbp2	WW domain-binding protein 2	RNA polymerase II core promoter sequence-specific DNA binding|RNA polymerase II transcription coactivator activity|protein binding|chromatin DNA binding|	nuclear chromatin|	0	0	0	0	0	0	0	0	0	0	Orphan	Non-polyA	N/A	1.29933	High	GRAM	N/A	N/A	N/A	N/A	N/A	N/A	N/A
P31942	Hnrnph3	Heterogeneous nuclear ribonucleoprotein H3	nucleotide binding|RNA binding|protein binding|poly(A) RNA binding|	nucleus|nucleoplasm|spliceosomal complex|	1	1	1	1	1	0	1	1	1	1	Known	polyA	polyA	1.367	High	RRM_6*2	N/A	N/A	N/A	N/A	N/A	N/A	N/A
Q13242	Srsf9	Serine/arginine-rich splicing factor 9	nucleotide binding|protein binding|poly(A) RNA binding|	nucleoplasm|nucleolus|	1	1	1	0	1	1	1	1	1	1	Known	polyA	polyA	1.39133	High	RRM_1*2	N/A	N/A	N/A	N/A	N/A	N/A	N/A
Q07666	Khdrbs1	KH domain-containing, RNA-binding, signal transduction-associated protein 1	DNA binding|RNA binding|SH3/SH2 adaptor activity|protein binding|poly(A) binding|poly(U) RNA binding|SH3 domain binding|protein complex binding|identical protein binding|poly(A) RNA binding|	nucleus|nucleoplasm|cytoplasm|membrane|Grb2-Sos complex|	1	1	1	1	1	1	1	0	1	1	Known	polyA	polyA	1.40167	High	KH_1	N/A	N/A	N/A	N/A	N/A	N/A	N/A
Q92804	Taf15	TATA-binding protein-associated factor 2N	nucleotide binding|DNA binding|protein binding|zinc ion binding|poly(A) RNA binding|	nucleus|nucleoplasm|cytoplasm|nucleolus|	1	1	1	1	1	1	1	1	1	1	Known	polyA	polyA	1.40167	High	RRM_1	zf-RanBP	N/A	N/A	N/A	N/A	N/A	N/A
P33240	Cstf2	Cleavage stimulation factor subunit 2	nucleotide binding|RNA binding|protein binding|poly(A) RNA binding|	nucleus|nucleoplasm|mRNA cleavage and polyadenylation specificity factor complex|cleavage body|	1	1	1	1	1	1	1	1	1	1	Known	polyA	polyA	1.40833	High	RRM_1	CSTF2_hinge	CSTF_C	N/A	N/A	N/A	N/A	N/A
Q01844	Ewsr1	RNA-binding protein EWS	nucleotide binding|RNA binding|protein binding|calmodulin binding|zinc ion binding|identical protein binding|poly(A) RNA binding|	nucleus|nucleoplasm|nucleolus|cytoplasm|plasma membrane|	1	1	1	1	1	1	1	1	1	1	Known	polyA	polyA	1.41767	High	RRM_6	zf-RanBP	N/A	N/A	N/A	N/A	N/A	N/A
Q14011	Cirbp	Cold-inducible RNA-binding protein	nucleotide binding|mRNA 3'-UTR binding|protein binding|translation repressor activity|poly(A) RNA binding|small ribosomal subunit rRNA binding|	nucleus|nucleoplasm|cytoplasm|cytoplasmic stress granule|	1	1	1	1	0	1	1	0	1	1	Known	polyA	polyA	1.438	High	RRM_1	N/A	N/A	N/A	N/A	N/A	N/A	N/A
Q9BWF3	Rbm4	RNA-binding protein 4	nucleotide binding|RNA binding|mRNA binding|mRNA 3'-UTR binding|protein binding|zinc ion binding|miRNA binding|poly(A) RNA binding|pre-mRNA intronic binding|pre-mRNA intronic pyrimidine-rich binding|	nucleus|nucleoplasm|nucleolus|cytoplasm|cytoplasmic stress granule|nuclear speck|	1	1	1	1	1	1	0	1	1	1	Known	polyA	polyA	1.45233	High	RRM_1*2	zf-CCHC	N/A	N/A	N/A	N/A	N/A	N/A
Q9Y2W1	Thrap3	Thyroid hormone receptor-associated protein 3	core promoter sequence-specific DNA binding|RNA polymerase II transcription cofactor activity|transcription cofactor activity|transcription coactivator activity|receptor activity|protein binding|ATP binding|ligand-dependent nuclear receptor transcription coactivator activity|vitamin D receptor binding|poly(A) RNA binding|thyroid hormone receptor binding|phosphoprotein binding|	nucleus|nucleoplasm|mediator complex|extracellular exosome|exon-exon junction complex|	1	1	1	1	1	0	1	0	1	1	Known	polyA	polyA	1.45467	High	THRAP3_BCLAF1	N/A	N/A	N/A	N/A	N/A	N/A	N/A
Q92734	Tfg	Protein TFG	signal transducer activity|protein binding|	cytoplasm|extracellular exosome|	1	0	0	0	0	0	0	0	0	0	Known	Non-polyA	N/A	1.47567	High	PB1	N/A	N/A	N/A	N/A	N/A	N/A	N/A
Q07955	Srsf1	Serine/arginine-rich splicing factor 1	nucleotide binding|RNA binding|mRNA binding|protein binding|poly(A) RNA binding|RS domain binding|	nucleus|nucleoplasm|cytoplasm|nuclear speck|extracellular exosome|catalytic step 2 spliceosome|exon-exon junction complex|	1	1	0	1	0	1	1	1	1	1	Known	polyA	polyA	1.47767	High	RRM_1	RRM_1	N/A	N/A	N/A	N/A	N/A	N/A
Q15532	Ss18	Protein SSXT	protein binding|ligand-dependent nuclear receptor transcription coactivator activity|	nucleus|cytoplasmic microtubule|npBAF complex|	0	0	0	0	0	0	0	0	0	0	Orphan	Non-polyA	N/A	1.48033	High	SSXT	N/A	N/A	N/A	N/A	N/A	N/A	N/A
O75340	Pdcd6	Programmed cell death protein 6	calcium-dependent cysteine-type endopeptidase activity|calcium ion binding|protein binding|identical protein binding|protein homodimerization activity|protein anchor|protein dimerization activity|calcium-dependent protein binding|binding, bridging|	nucleus|cytoplasm|endosome|endoplasmic reticulum|endoplasmic reticulum membrane|cytoplasmic vesicle|nuclear membrane|extracellular exosome|endoplasmic reticulum exit site|	0	0	0	0	0	0	0	0	0	0	Orphan	Non-polyA	N/A	1.52867	High	EF-hand_5	EF-hand_7	N/A	N/A	N/A	N/A	N/A	N/A
Q8N684	Cpsf7	Cleavage and polyadenylation specificity factor subunit 7	nucleotide binding|protein binding|poly(A) RNA binding|	nucleus|nucleoplasm|mRNA cleavage factor complex|membrane|	1	0	1	1	1	1	1	0	1	1	Known	polyA	polyA	1.54233	High	RRM_1	N/A	N/A	N/A	N/A	N/A	N/A	N/A
Q92567	Fam168a	Protein FAM168A	protein binding|	N/A	0	0	0	0	0	0	0	0	0	0	Orphan	Non-polyA	N/A	1.54533	High	TCRP1	N/A	N/A	N/A	N/A	N/A	N/A	N/A
O95429	Bag4	BAG family molecular chaperone regulator 4	receptor signaling protein activity|protein binding|ubiquitin protein ligase binding|poly(A) RNA binding|chaperone binding|	nucleus|cytosol|plasma membrane|	0	0	0	1	0	0	0	0	0	0	Known	polyA	polyA	1.564	High	BAG	N/A	N/A	N/A	N/A	N/A	N/A	N/A
P78332	Rbm6	RNA-binding protein 6	nucleotide binding|DNA binding|RNA binding|protein binding|poly(A) RNA binding|	nucleus|	1	1	1	1	1	0	1	0	1	1	Known	polyA	polyA	1.56433	High	RRM_6*2	N/A	N/A	N/A	N/A	N/A	N/A	N/A
Q5BKZ1	Znf326	DBIRD complex subunit ZNF326	RNA polymerase II core binding|DNA binding|protein binding|poly(A) RNA binding|metal ion binding|	nucleoplasm|nuclear matrix|intracellular membrane-bounded organelle|DBIRD complex|spliceosomal complex|	1	1	1	1	1	0	1	1	1	1	Known	polyA	polyA	1.58	High	AKAP95	N/A	N/A	N/A	N/A	N/A	N/A	N/A
Q96EP5	Dazap1	DAZ-associated protein 1	nucleotide binding|RNA binding|RNA stem-loop binding|poly(A) RNA binding|	nucleoplasm|cytoplasm|	1	1	1	1	1	1	1	1	1	1	Known	polyA	polyA	1.59633	High	RRM_1*2	N/A	N/A	N/A	N/A	N/A	N/A	N/A
Q13151	Hnrnpa0	Heterogeneous nuclear ribonucleoprotein A0	nucleotide binding|RNA binding|AU-rich element binding|protein kinase binding|poly(A) RNA binding|	nucleus|nucleoplasm|ribonucleoprotein complex|	1	1	1	1	1	1	1	1	1	1	Known	polyA	polyA	1.60867	High	RRM_1	RRM_6	N/A	N/A	N/A	N/A	N/A	N/A
P20073	Anxa7	Annexin A7	integrin binding|calcium ion binding|protein binding|calcium-dependent phospholipid binding|poly(A) RNA binding|calcium-dependent protein binding|	nucleus|nuclear envelope|endoplasmic reticulum membrane|cytosol|plasma membrane|membrane|extracellular exosome|chromaffin granule membrane|	0	0	1	1	0	0	0	0	0	0	Known	polyA	polyA	1.63133	High	Annexin*4	N/A	N/A	N/A	N/A	N/A	N/A	N/A
O43809	Nudt21	Cleavage and polyadenylation specificity factor subunit 5	mRNA binding|protein binding|hydrolase activity|AU-rich element binding|protein homodimerization activity|histone deacetylase binding|poly(A) RNA binding|RNA binding|	nucleus|nucleoplasm|centrosome|mRNA cleavage factor complex|paraspeckles|	0	0	1	1	0	1	1	0	1	1	Known	polyA	polyA	1.635	High	NUDIX_2	N/A	N/A	N/A	N/A	N/A	N/A	N/A
O43823	Akap8	A-kinase anchor protein 8	double-stranded DNA binding|zinc ion binding|protein kinase A regulatory subunit binding|poly(A) RNA binding|	female pronucleus|nucleus|nucleoplasm|mitochondrion|Golgi apparatus|membrane|nuclear matrix|	1	1	1	1	1	0	1	0	1	1	Known	polyA	polyA	1.636	High	AKAP95	N/A	N/A	N/A	N/A	N/A	N/A	N/A
Q9UBV8	Pef1	Peflin	calcium-dependent cysteine-type endopeptidase activity|calcium ion binding|protein binding|poly(A) RNA binding|protein heterodimerization activity|protein dimerization activity|	cytoplasm|membrane|extracellular exosome|	0	0	1	1	0	0	0	0	0	0	Known	polyA	polyA	1.63667	High	EF-hand_7	EF-hand_6	N/A	N/A	N/A	N/A	N/A	N/A
P30626	Sri	Sorcin	protease binding|calcium-dependent cysteine-type endopeptidase activity|receptor binding|calcium channel regulator activity|calcium ion binding|protein binding|identical protein binding|ion channel binding|protein heterodimerization activity|repressing transcription factor binding|	nucleoplasm|cytoplasm|mitochondrion|endoplasmic reticulum membrane|smooth endoplasmic reticulum|cytosol|membrane|sarcoplasmic reticulum|Z disc|T-tubule|sarcoplasmic reticulum membrane|axon terminus|dendritic spine neck|extracellular exosome|chromaffin granule membrane|	0	0	0	0	0	0	0	0	0	0	Orphan	Non-polyA	N/A	1.63833	High	EF-hand_8	EF-hand_7	N/A	N/A	N/A	N/A	N/A	N/A
Q6UN15	Fip1l1	Pre-mRNA 3'-end-processing factor FIP1	protein binding|poly(A) RNA binding|	nucleoplasm|mRNA cleavage and polyadenylation specificity factor complex|	1	0	1	1	0	1	1	0	1	1	Known	polyA	polyA	1.66067	High	Fip1	N/A	N/A	N/A	N/A	N/A	N/A	N/A
P09012	Snrpa	U1 small nuclear ribonucleoprotein A	nucleotide binding|RNA binding|protein binding|snRNA binding|poly(A) RNA binding|	nucleoplasm|spliceosomal complex|U1 snRNP|nucleolus|cytoplasm|	1	0	1	1	0	1	0	0	0	1	Known	polyA	polyA	1.67333	High	RRM1 *2	N/A	N/A	N/A	N/A	N/A	N/A	N/A
Q8IXT5	Rbm12b	RNA-binding protein 12B	nucleotide binding|protein binding|poly(A) RNA binding|	N/A	1	1	1	1	1	0	1	1	1	1	Known	polyA	polyA	1.676	High	RRM_6*5	N/A	N/A	N/A	N/A	N/A	N/A	N/A
O43251-6	Rbfox2	Isoform 6 of RNA binding protein fox-1 homolog 2	nucleotide binding|transcription corepressor activity|RNA binding|mRNA binding|protein binding|transcription factor binding|poly(A) RNA binding|	nucleus|nucleoplasm|cytoplasm|	0	1	1	1	1	1	1	0	1	0	Known	polyA	polyA	1.69233	High	N/A	N/A	N/A	N/A	N/A	N/A	N/A	N/A
P62993	Grb2	Growth factor receptor-bound protein 2	phosphotyrosine binding|SH3/SH2 adaptor activity|epidermal growth factor receptor binding|neurotrophin TRKA receptor binding|protein binding|SH3 domain binding|protein kinase binding|protein phosphatase binding|identical protein binding|insulin receptor substrate binding|poly(A) RNA binding|ephrin receptor binding|	nucleus|nucleoplasm|nucleolus|cytoplasm|endosome|Golgi apparatus|cytosol|plasma membrane|cell-cell junction|COP9 signalosome|vesicle membrane|extracellular exosome|Grb2-EGFR complex|	1	0	0	0	0	0	0	0	1	0	Known	polyA	polyA	1.696	High	SH3_1*2	SH2	N/A	N/A	N/A	N/A	N/A	N/A
Q86U42	Pabpn1	Polyadenylate-binding protein 2	nucleotide binding|RNA binding|protein binding|poly(A) RNA binding|	nucleus|nucleoplasm|cytoplasm|ribonucleoprotein complex|nuclear inclusion body|	1	1	1	1	0	1	1	1	1	1	Known	polyA	polyA	1.71367	High	RRM_1	N/A	N/A	N/A	N/A	N/A	N/A	N/A
Q9BUJ2	Hnrnpul1	Heterogeneous nuclear ribonucleoprotein U-like protein 1	RNA binding|protein binding|enzyme binding|poly(A) RNA binding|	nucleus|nucleoplasm|ribonucleoprotein complex|	1	1	1	1	1	1	1	0	1	1	Known	polyA	polyA	1.74267	High	SAP	SPRY	AAA_33	N/A	N/A	N/A	N/A	N/A
Q16630	Cpsf6	Cleavage and polyadenylation specificity factor subunit 6	nucleotide binding|mRNA binding|protein binding|poly(A) RNA binding|RNA binding|	nucleus|nucleoplasm|mRNA cleavage factor complex|membrane|ribonucleoprotein complex|paraspeckles|	1	0	1	1	1	1	0	0	1	1	Known	polyA	polyA	1.75133	High	RRM_1	N/A	N/A	N/A	N/A	N/A	N/A	N/A
P22626	Hnrnpa2b1	Heterogeneous nuclear ribonucleoproteins A2/B1	nucleotide binding|RNA binding|protein binding|single-stranded telomeric DNA binding|poly(A) RNA binding|pre-mRNA intronic binding|	nucleus|nucleoplasm|spliceosomal complex|cytoplasm|membrane|ribonucleoprotein complex|catalytic step 2 spliceosome|	1	1	1	1	1	1	1	1	1	1	Known	polyA	polyA	1.77667	High	RRM_1*2	N/A	N/A	N/A	N/A	N/A	N/A	N/A
O95218	Zranb2	Zinc finger Ran-binding domain-containing protein 2	sequence-specific DNA binding transcription factor activity|RNA binding|protein binding|zinc ion binding|poly(A) RNA binding|	nucleus|nucleoplasm|	1	1	1	1	0	1	0	1	1	0	Known	polyA	polyA	1.77867	High	zf-RanBP	zf-RanBP	N/A	N/A	N/A	N/A	N/A	N/A
Q15459	Sf3a1	Splicing factor 3A subunit 1	RNA binding|protein binding|poly(A) RNA binding|	nucleoplasm|spliceosomal complex|U2-type spliceosomal complex|U2 snRNP|U2-type prespliceosome|catalytic step 2 spliceosome|	1	0	1	1	0	1	0	0	1	0	Known	polyA	polyA	1.78267	High	Surp	Surp	PRP21_like_P	ubiquitin	N/A	N/A	N/A	N/A
P31943	Hnrnph1	Heterogeneous nuclear ribonucleoprotein H	nucleotide binding|RNA binding|protein binding|poly(U) RNA binding|poly(A) RNA binding|	nucleus|nucleoplasm|membrane|catalytic step 2 spliceosome|	1	1	1	1	1	1	1	1	1	1	Known	polyA	polyA	1.784	High	RRM_6*3	zf-RNPHF	N/A	N/A	N/A	N/A	N/A	N/A
Q15637-4	Sf1	Isoform 4 of Splicing factor 1	transcription corepressor activity|RNA binding|protein binding|zinc ion binding|poly(A) RNA binding|pre-mRNA branch point binding|	nucleus|nucleoplasm|spliceosomal complex|ribosome|	1	1	1	1	1	1	1	1	1	1	Known	polyA	polyA	1.78633	High	N/A	N/A	N/A	N/A	N/A	N/A	N/A	N/A
Q9UPT8	Zc3h4	Zinc finger CCCH domain-containing protein 4	poly(A) RNA binding|metal ion binding|	N/A	1	1	1	1	0	0	1	0	1	1	Known	polyA	polyA	1.797	High	zf-CCCH_4	zf-CCCH	zf-CCCH_2	N/A	N/A	N/A	N/A	N/A
P17844	Ddx5	Probable ATP-dependent RNA helicase DDX5	transcription coactivator activity|RNA helicase activity|ATP-dependent RNA helicase activity|protein binding|calmodulin binding|ATP binding|enzyme binding|estrogen receptor binding|pre-mRNA binding|poly(A) RNA binding|calcium-dependent protein binding|androgen receptor binding|	nucleus|nucleoplasm|nucleolus|membrane|ribonucleoprotein complex|extracellular exosome|catalytic step 2 spliceosome|	1	1	1	1	1	1	1	1	1	1	Known	polyA	polyA	1.80667	High	DEAD	Helicase_C	P68HR*2	N/A	N/A	N/A	N/A	N/A
Q96I25	Rbm17	Splicing factor 45	nucleotide binding|RNA binding|protein binding|	nucleoplasm|spliceosomal complex|	0	0	0	0	0	1	0	0	0	0	Known	Non-polyA	mRNA (Gerstberger, S., et al. Nat. Rev. Genetics. 2013. )	1.833	High	G-patch	RRM_1	N/A	N/A	N/A	N/A	N/A	N/A
Q96PU8	Qki	Protein quaking	mRNA binding|protein binding|SH3 domain binding|poly(A) RNA binding|	nucleus|cytoplasm|	1	0	1	1	0	0	1	0	0	1	Known	polyA	polyA	1.84233	High	STAR_dimer	KH1	Quaking_NLS	N/A	N/A	N/A	N/A	N/A
Q9UPN6	Scaf8	Protein SCAF8	nucleotide binding|RNA binding|protein binding|RNA polymerase core enzyme binding|	nucleoplasm|spliceosomal complex|nuclear matrix|	1	0	0	0	0	1	0	0	0	0	Known	Non-polyA	mRNA (Gregersen L.H., et al. Cell. 2019.)	1.849	High	CTD bind	RRM1	N/A	N/A	N/A	N/A	N/A	N/A
Q99590	Scaf11	Protein SCAF11	protein binding|zinc ion binding|poly(A) RNA binding|	nucleus|nucleoplasm|nucleolus|	1	0	1	1	1	0	0	0	1	1	Known	polyA	polyA	1.86033	High	zf-RING_2	N/A	N/A	N/A	N/A	N/A	N/A	N/A
P15927	Rpa2	Replication protein A 32 kDa subunit	damaged DNA binding|single-stranded DNA binding|protein binding|enzyme binding|protein phosphatase binding|ubiquitin protein ligase binding|protein N-terminus binding|	chromatin|nucleus|nucleoplasm|DNA replication factor A complex|PML body|chromosome, telomeric region|PML body|site of double-strand break|	0	0	0	0	0	0	0	0	0	0	Orphan	Non-polyA	N/A	1.86467	High	RPA_C	N/A	N/A	N/A	N/A	N/A	N/A	N/A
Q99729-2	Hnrnpab	Isoform 2 of Heterogeneous nuclear ribonucleoprotein A/B	nucleotide binding|RNA binding|mRNA binding|poly(A) RNA binding|sequence-specific DNA binding transcription factor activity|sequence-specific DNA binding|	nucleus|nucleoplasm|cytoplasm|ribonucleoprotein complex|RNA polymerase II transcription factor complex|	1	1	1	1	1	1	1	1	1	1	Known	polyA	polyA	1.894	High	N/A	N/A	N/A	N/A	N/A	N/A	N/A	N/A
Q9NZ63	C9orf78	Telomere length and silencing protein 1 homolog	N/A	nucleoplasm|cytoplasm|	0	0	0	0	0	0	0	0	0	0	Orphan	Non-polyA	N/A	1.90767	High	Hep_59	N/A	N/A	N/A	N/A	N/A	N/A	N/A
O14979	Hnrnpdl	Heterogeneous nuclear ribonucleoprotein D-like	nucleotide binding|DNA binding|double-stranded DNA binding|single-stranded DNA binding|poly(A) binding|poly(G) binding|poly(A) RNA binding|	nucleus|nucleoplasm|spliceosomal complex|cytoplasm|extracellular exosome|	1	1	1	0	1	1	1	1	0	0	Known	polyA	polyA	1.91067	High	RRM_1*2	N/A	N/A	N/A	N/A	N/A	N/A	N/A
Q15061	Wdr43	WD repeat-containing protein 43	poly(A) RNA binding|	nucleolus|	1	1	1	0	0	1	0	0	1	0	Known	polyA	polyA	1.92433	High	WD40	WD40	Utp12	N/A	N/A	N/A	N/A	N/A
P61978-3	Hnrnpk	Isoform 3 of Heterogeneous nuclear ribonucleoprotein K	RNA polymerase II core promoter proximal region sequence-specific DNA binding|RNA polymerase II core promoter proximal region sequence-specific DNA binding transcription factor activity involved in positive regulation of transcription|single-stranded DNA binding|RNA binding|protein binding|poly(A) RNA binding|	nuclear chromatin|podosome|nucleus|nucleoplasm|cytoplasm|focal adhesion|membrane|cell projection|extracellular exosome|catalytic step 2 spliceosome|	1	1	0	1	1	1	1	1	1	0	Known	polyA	polyA	1.94033	High	N/A	N/A	N/A	N/A	N/A	N/A	N/A	N/A
Q01804	Otud4	OTU domain-containing protein 4	ubiquitin-specific protease activity|protein binding|poly(A) RNA binding|	N/A	1	1	1	1	0	0	0	0	0	1	Known	polyA	polyA	1.94567	High	OUT	N/A	N/A	N/A	N/A	N/A	N/A	N/A
P50995	Anxa11	Annexin A11	calcium ion binding|protein binding|calcium-dependent phospholipid binding|phosphatidylethanolamine binding|MHC class II protein complex binding|S100 protein binding|poly(A) RNA binding|calcium-dependent protein binding|	nuclear envelope|nucleoplasm|cytoplasm|spindle|membrane|midbody|melanosome|specific granule|azurophil granule|phagocytic vesicle|extracellular exosome|	1	0	1	1	0	0	0	0	0	0	Known	polyA	polyA	1.94833	High	Annexin*4	N/A	N/A	N/A	N/A	N/A	N/A	N/A
A0A0A0MR66	Rbm10	RNA binding motif protein 10, isoform CRA_d	nucleotide binding|nucleic acid binding|zinc ion binding|	N/A	0	0	0	1	0	1	1	0	1	1	Known	polyA	polyA	1.949	High	RRM1	zf-RanBP	OCRE	G-PATCH	N/A	N/A	N/A	N/A
P07737	Pfn1	Profilin-1	adenyl-nucleotide exchange factor activity|actin binding|actin monomer binding|protein binding|phosphatidylinositol-4,5-bisphosphate binding|Rho GTPase binding|poly(A) RNA binding|proline-rich region binding|	nucleus|cytoplasm|cytosol|cytoskeleton|focal adhesion|cell cortex|membrane|extracellular exosome|blood microparticle|	1	0	1	1	1	0	0	0	0	0	Known	polyA	polyA	1.953	High	Profilin	N/A	N/A	N/A	N/A	N/A	N/A	N/A
Q92945	Khsrp	Far upstream element-binding protein 2	DNA binding|mRNA binding|poly(A) RNA binding|	nucleoplasm|cytosol|cytoplasmic stress granule|membrane|	1	1	1	1	1	1	1	1	1	1	Known	polyA	polyA	1.98067	High	KH_1*4	DUF1897	DUF1897	N/A	N/A	N/A	N/A	N/A
O14776	Tcerg1	Transcription elongation regulator 1	RNA polymerase II repressing transcription factor binding|RNA polymerase II transcription corepressor activity|transcription coactivator activity|protein binding|poly(A) RNA binding|proline-rich region binding|	nucleus|nucleolus|actin cytoskeleton|	1	0	1	1	0	0	0	0	1	0	Known	polyA	polyA	1.992	High	WW	WW	FF*6	N/A	N/A	N/A	N/A	N/A
O43670	Znf207	BUB3-interacting and GLEBS motif-containing protein ZNF207	DNA binding|sequence-specific DNA binding transcription factor activity|protein binding|microtubule binding|heparin binding|zinc ion binding|poly(A) RNA binding|	kinetochore|condensed chromosome kinetochore|nucleus|nucleolus|microtubule|	1	0	1	1	1	0	0	0	0	0	Known	polyA	polyA	2.015	High	N/A	N/A	N/A	N/A	N/A	N/A	N/A	N/A
Q01085-2	Tial1	Isoform 2 of Nucleolysin TIAR	nucleotide binding|RNA binding|AU-rich element binding|poly(A) RNA binding|	nucleus|cytoplasm|lysosome|cytoplasmic stress granule|extracellular exosome|	1	1	0	1	1	1	1	1	1	0	Known	polyA	polyA	2.02133	High	N/A	N/A	N/A	N/A	N/A	N/A	N/A	N/A
Q1KMD3	Hnrnpul2	Heterogeneous nuclear ribonucleoprotein U-like protein 2	poly(A) RNA binding|	nucleus|membrane|	1	1	1	1	1	1	1	0	1	1	Known	polyA	polyA	2.039	High	SAP	SPRY	AAA_33	N/A	N/A	N/A	N/A	N/A
Q08945	Ssrp1	FACT complex subunit SSRP1	DNA binding|chromatin binding|protein binding|poly(A) RNA binding|	nucleus|nucleoplasm|chromosome|nucleolus|cytoplasm|	1	0	0	1	1	0	0	0	1	0	Known	polyA	polyA	2.043	High	POB3_N	SSrecog	Rtt106	HMG_box	N/A	N/A	N/A	N/A
A0A087WZ13	Raver1	Ribonucleoprotein PTB-binding 1	nucleotide binding|nucleic acid binding|	N/A	1	1	1	1	1	0	1	0	1	1	Known	polyA	polyA	2.044	High	RRM_1	RRM_6*2	N/A	N/A	N/A	N/A	N/A	N/A
Q8WYB5	Kat6b	Histone acetyltransferase KAT6B	DNA binding|histone acetyltransferase activity|protein binding|transcription factor binding|zinc ion binding|acetyltransferase activity|protein complex binding|	nucleosome|nucleus|nucleoplasm|MOZ/MORF histone acetyltransferase complex|	0	0	0	0	0	0	0	0	0	0	Orphan	Non-polyA	N/A	2.05467	High	PHD	zf-MYST	MOZ_SAS	N/A	N/A	N/A	N/A	N/A
Q12996	Cstf3	Cleavage stimulation factor subunit 3	RNA binding|mRNA binding|protein binding|poly(A) RNA binding|	nucleus|nucleoplasm|	0	0	1	1	0	1	0	1	0	0	Known	polyA	polyA	2.05767	High	Suf	N/A	N/A	N/A	N/A	N/A	N/A	N/A
Q13148	Tardbp	TAR DNA-binding protein 43	nucleotide binding|RNA polymerase II distal enhancer sequence-specific DNA binding transcription factor activity involved in positive regulation of transcription|double-stranded DNA binding|sequence-specific DNA binding transcription factor activity|RNA binding|mRNA 3'-UTR binding|protein binding|identical protein binding|poly(A) RNA binding|	nucleus|nucleoplasm|perichromatin fibrils|cytoplasm|nuclear speck|interchromatin granule|	1	1	1	1	1	1	1	1	1	1	Known	polyA	polyA	2.061	High	RRM_1*2	N/A	N/A	N/A	N/A	N/A	N/A	N/A
Q96KR1	Zfr	Zinc finger RNA-binding protein	DNA binding|protein binding|zinc ion binding|poly(A) RNA binding|	nucleoplasm|chromosome|cytoplasm|	1	1	1	1	1	1	1	1	1	1	Known	polyA	polyA	2.08133	High	zf-met*3	DZF	N/A	N/A	N/A	N/A	N/A	N/A
Q9ULX6	Akap8l	A-kinase anchor protein 8-like	DNA binding|protein binding|DEAD/H-box RNA helicase binding|poly(A) RNA binding|metal ion binding|	nucleus|nucleoplasm|cytoplasm|nuclear matrix|	1	1	1	1	1	0	1	0	1	1	Known	polyA	polyA	2.087	High	AKAP95	N/A	N/A	N/A	N/A	N/A	N/A	N/A
Q14966	Znf638	Zinc finger protein 638	nucleotide binding|double-stranded DNA binding|RNA binding|zinc ion binding|poly(A) RNA binding|	nucleoplasm|cytoplasm|nuclear speck|intracellular membrane-bounded organelle|	1	0	1	1	0	0	1	0	1	1	Known	polyA	polyA	2.09433	High	RRM_1	zf-C2H2_jaz	N/A	N/A	N/A	N/A	N/A	N/A
Q14103	Hnrnpd	Heterogeneous nuclear ribonucleoprotein D0	nucleotide binding|RNA binding|protein binding|telomeric DNA binding|poly(A) RNA binding|	nucleus|nucleoplasm|cytosol|ribonucleoprotein complex|extracellular exosome|	1	1	1	1	1	1	1	1	1	1	Known	polyA	polyA	2.09967	High	CBFNT	RRM_1*2	N/A	N/A	N/A	N/A	N/A	N/A
P14866	Hnrnpl	Heterogeneous nuclear ribonucleoprotein L	nucleotide binding|RNA binding|protein binding|transcription regulatory region DNA binding|poly(A) RNA binding|	nucleus|nucleoplasm|cytoplasm|membrane|ribonucleoprotein complex|pronucleus|extracellular exosome|	1	1	1	1	1	1	1	1	1	1	Known	polyA	polyA	2.1	High	RRM_5*3	N/A	N/A	N/A	N/A	N/A	N/A	N/A
Q8WXI9	Gatad2b	Transcriptional repressor p66-beta	sequence-specific DNA binding transcription factor activity|protein binding|zinc ion binding|RNA polymerase II core promoter proximal region sequence-specific DNA binding|RNA polymerase II distal enhancer sequence-specific DNA binding|nucleosomal DNA binding|	nuclear chromatin|nucleoplasm|nuclear speck|protein complex|	1	0	0	0	0	0	0	0	0	0	Known	Non-polyA	N/A	2.105	High	P66_CC	GATA	N/A	N/A	N/A	N/A	N/A	N/A
Q8NF64	Zmiz2	Zinc finger MIZ domain-containing protein 2	protein binding|zinc ion binding|ligand-dependent nuclear receptor transcription coactivator activity|	nucleus|nucleoplasm|mitochondrion|nuclear replication fork|	0	0	0	0	0	0	0	0	0	0	Orphan	Non-polyA	N/A	2.12133	High	zf-MIZ	N/A	N/A	N/A	N/A	N/A	N/A	N/A
O14646	Chd1	Chromodomain-helicase-DNA-binding protein 1	DNA binding|ATP-dependent DNA helicase activity|protein binding|ATP binding|methylated histone binding|	nucleus|cytoplasm|	1	0	0	0	0	0	0	0	0	0	Known	Non-polyA	N/A	2.126	High	Chromo	Chromo	SNF2_N	Helicase C	CDH1_2_SANT_HL1	DUF4208	N/A	N/A
Q12906-7	Ilf3	Isoform 7 of Interleukin enhancer-binding factor 3	DNA binding|RNA binding|double-stranded RNA binding|protein binding|poly(A) RNA binding|	nucleus|nucleoplasm|nucleolus|cytoplasm|mitochondrion|membrane|ribonucleoprotein complex|	1	1	1	1	1	1	1	1	1	1	Known	polyA	polyA	2.127	High	DZF	dsrm*2	N/A	N/A	N/A	N/A	N/A	N/A
Q9NTZ6	Rbm12	RNA-binding protein 12	nucleotide binding|poly(A) RNA binding|	nucleoplasm|	1	1	1	0	0	1	1	0	1	1	Known	polyA	polyA	2.152	High	RRM_1*3	N/A	N/A	N/A	N/A	N/A	N/A	N/A
O15541	Rnf113a	RING finger protein 113A	protein binding|zinc ion binding|	N/A	0	0	0	0	0	0	0	0	0	0	Orphan	Non-polyA	N/A	2.153	High	zf-CCCH	zf-C3HC4_3	N/A	N/A	N/A	N/A	N/A	N/A
Q9BTE3	Mcmbp	Mini-chromosome maintenance complex-binding protein	chromatin binding|protein binding|	nucleus|nucleoplasm|cytoplasm|plasma membrane|MCM complex|	1	0	0	0	0	0	0	0	0	0	Known	Non-polyA	N/A	2.159	High	MCM_bind	N/A	N/A	N/A	N/A	N/A	N/A	N/A
Q96EV2	Rbm33	RNA-binding protein 33	nucleotide binding|poly(A) RNA binding|	N/A	1	0	1	1	0	0	0	0	1	0	Known	polyA	polyA	2.15967	High	N/A	N/A	N/A	N/A	N/A	N/A	N/A	N/A
Q8WVC0	Leo1	RNA polymerase-associated protein LEO1	protein binding|	nucleoplasm|nucleolus|Cdc73/Paf1 complex|	1	0	0	0	0	0	0	0	0	0	Known	Non-polyA	mRNA (Dermody J.L. J. Biol. Chem. 2010. )	2.17167	High	Leo1	N/A	N/A	N/A	N/A	N/A	N/A	N/A
Q92530	Psmf1	Proteasome inhibitor PI31 subunit	endopeptidase inhibitor activity|protein binding|proteasome binding|	nucleoplasm|cytoplasm|endoplasmic reticulum|cytosol|proteasome core complex|membrane|	1	0	0	0	0	0	0	0	0	0	Known	Non-polyA	mRNA (Jonson L., et al. Mol.&Cell. Proteomics. 2007.)	2.179	High	PI31_Prot_N	PI31_Prot_C	N/A	N/A	N/A	N/A	N/A	N/A
Q5VT52	Rprd2	Regulation of nuclear pre-mRNA domain-containing protein 2	N/A	DNA-directed RNA polymerase II, holoenzyme|	1	0	0	0	0	0	0	0	0	1	Known	polyA	polyA	2.17933	High	CTD_bind	CREPT	N/A	N/A	N/A	N/A	N/A	N/A
Q15773	Mlf2	Myeloid leukemia factor 2	protein binding|	nucleus|cytoplasm|membrane|	0	0	0	0	0	0	0	0	0	0	Orphan	Non-polyA	N/A	2.18367	High	Mlf1IP	N/A	N/A	N/A	N/A	N/A	N/A	N/A
Q9UGU0	Tcf20	Transcription factor 20	DNA binding|transcription coactivator activity|zinc ion binding|poly(A) RNA binding|	nucleus|nucleoplasm|	1	0	0	0	0	0	0	0	1	0	Known	polyA	polyA	2.20467	High	zf-HC5HC2H	N/A	N/A	N/A	N/A	N/A	N/A	N/A
Q9BXP5	Srrt	Serrate RNA effector molecule homolog	DNA binding|protein binding|poly(A) RNA binding|	nucleus|nucleoplasm|cytoplasm|	1	1	1	1	1	0	1	0	1	1	Known	polyA	polyA	2.21233	High	DUF3546	ARS2	N/A	N/A	N/A	N/A	N/A	N/A
O00267	Supt5h	Transcription elongation factor SPT5	chromatin binding|protein binding|enzyme binding|poly(A) RNA binding|protein heterodimerization activity|	nucleus|nucleoplasm|DSIF complex|	1	0	1	1	0	0	1	1	1	1	Known	polyA	polyA	2.21733	High	Spt5_N	Spt5_NGN	KOW	N/A	N/A	N/A	N/A	N/A
O75909	Ccnk	Cyclin-K	cyclin-dependent protein serine/threonine kinase activity|protein binding|RNA polymerase II carboxy-terminal domain kinase activity|protein kinase binding|	cyclin K-CDK12 complex|cyclin K-CDK13 complex|nucleus|	1	0	0	0	0	0	0	0	0	0	Known	Non-polyA	N/A	2.22333	High	Cyclin_N	Cyclin_C	N/A	N/A	N/A	N/A	N/A	N/A
Q96T37	Rbm15	Putative RNA-binding protein 15	nucleotide binding|protein binding|poly(A) RNA binding|	nucleoplasm|nuclear membrane|	1	1	1	1	1	1	1	1	1	1	Known	polyA	polyA	2.22733	High	RRM_1	RRM_5*2	SPOC	N/A	N/A	N/A	N/A	N/A
Q9UQR0	Scml2	Sex comb on midleg-like protein 2	DNA binding|sequence-specific DNA binding transcription factor activity|	nucleus|PcG protein complex|	0	0	0	0	0	0	0	0	0	0	Orphan	Non-polyA	N/A	2.23933	High	MBT*2	RBR	SLED	SAM 1	N/A	N/A	N/A	N/A
P09429	Hmgb1	High mobility group protein B1	four-way junction DNA binding|bubble DNA binding|chromatin binding|damaged DNA binding|double-stranded DNA binding|single-stranded DNA binding|sequence-specific DNA binding transcription factor activity|cytokine activity|protein binding|transcription factor binding|DNA binding, bending|chemoattractant activity|poly(A) RNA binding|RAGE receptor binding|repressing transcription factor binding|super…	condensed chromosome|extracellular region|extracellular space|nucleus|nucleoplasm|cell surface|transcriptional repressor complex|	1	1	1	1	1	1	0	1	1	1	Known	polyA	polyA	2.245	High	HMG_box_2	HMG_box	N/A	N/A	N/A	N/A	N/A	N/A
Q93074	Med12	Mediator of RNA polymerase II transcription subunit 12	RNA polymerase II distal enhancer sequence-specific DNA binding|RNA polymerase II transcription cofactor activity|RNA polymerase II transcription factor binding transcription activator activity|chromatin binding|transcription cofactor activity|transcription coactivator activity|receptor activity|protein binding|beta-catenin binding|protein C-terminus binding|protein domain specific binding|ligand…	ubiquitin ligase complex|nucleus|nucleoplasm|nucleolus|centrosome|membrane|mediator complex|	1	0	0	0	0	0	0	0	0	0	Known	Non-polyA	ncRNA (Lai F., et al. Nature. 2014.)	2.25033	High	Med12	Med12-LCEWAV	N/A	N/A	N/A	N/A	N/A	N/A
Q9NR56	Mbnl1	Muscleblind-like protein 1	RNA binding|double-stranded RNA binding|protein binding|poly(A) RNA binding|metal ion binding|	nucleus|nucleoplasm|cytoplasm|centrosome|cytoplasmic stress granule|	1	1	1	1	1	1	1	0	1	1	Known	polyA	polyA	2.25333	High	zf-CCCH	N/A	N/A	N/A	N/A	N/A	N/A	N/A
Q7Z7F0	Kiaa0907	Protein BLOM7	RNA binding|protein binding|	nucleus|	0	0	0	0	0	0	0	0	0	0	Orphan	Non-polyA	N/A	2.25633	High	N/A	N/A	N/A	N/A	N/A	N/A	N/A	N/A
Q15417	Cnn3	Calponin-3	actin binding|calmodulin binding|microtubule binding|	cytoplasm|focal adhesion|postsynaptic density|actin cytoskeleton|neuronal cell body|dendritic spine|	1	0	0	0	0	0	0	0	0	0	Known	Non-polyA	N/A	2.26767	High	CH	Calponin*3	N/A	N/A	N/A	N/A	N/A	N/A
Q13573	Snw1	SNW domain-containing protein 1	transcription coactivator activity|transcription corepressor activity|Notch binding|protein binding|nuclear hormone receptor binding|vitamin D receptor binding|retinoic acid receptor binding|poly(A) RNA binding|SMAD binding|	chromatin|nucleus|nucleoplasm|spliceosomal complex|nuclear matrix|catalytic step 2 spliceosome|positive transcription elongation factor complex b|SMAD3-SMAD4 protein complex|	1	1	1	1	0	0	1	0	0	0	Known	polyA	polyA	2.28033	High	SKIP_SNW	N/A	N/A	N/A	N/A	N/A	N/A	N/A
Q08211	Dhx9	ATP-dependent RNA helicase A	RNA polymerase II transcription factor binding|DNA binding|RNA helicase activity|ATP-dependent DNA helicase activity|ATP-dependent RNA helicase activity|protein binding|ATP binding|poly(A) RNA binding|	nucleus|nucleoplasm|nucleolus|cytoplasm|centrosome|cytosol|membrane|ribonucleoprotein complex|cytoplasmic ribonucleoprotein granule|CRD-mediated mRNA stability complex|	1	1	1	1	1	1	1	1	1	1	Known	polyA	polyA	2.281	High	dsrm*2	DEAD	Helicase_C	HA2	OB_NTP_bind	N/A	N/A	N/A
Q13123	Ik	Protein Red	protein binding|identical protein binding|	extracellular space|nucleoplasm|nucleolus|	1	0	1	0	0	0	0	0	0	1	Known	polyA	polyA	2.29767	High	RED N	RED C	N/A	N/A	N/A	N/A	N/A	N/A
Q8IX12	Ccar1	Cell division cycle and apoptosis regulator protein 1	core promoter binding|transcription coactivator activity|transcription corepressor activity|protein binding|ligand-dependent nuclear receptor transcription coactivator activity|poly(A) RNA binding|	nucleoplasm|perinuclear region of cytoplasm|	1	0	0	1	0	0	0	0	1	1	Known	polyA	polyA	2.30233	High	S1-like	DBC1	SAP	N/A	N/A	N/A	N/A	N/A
Q8WYQ5	Dgcr8	Microprocessor complex subunit DGCR8	double-stranded RNA binding|protein binding|heme binding|protein homodimerization activity|metal ion binding|primary miRNA binding|ribonuclease III activity|	nucleus|nucleoplasm|nucleolus|cytoplasm|microtubule cytoskeleton|microprocessor complex|	1	0	0	0	0	1	0	0	0	0	Known	Non-polyA	miRNA(Han J., et al. Genes & Development. 2004.)	2.30633	High	dsrm*2	N/A	N/A	N/A	N/A	N/A	N/A	N/A
Q96DH6	Msi2	RNA-binding protein Musashi homolog 2	nucleotide binding|protein binding|poly(U) RNA binding|poly(A) RNA binding|	cytoplasm|polysome|	1	1	1	1	0	1	1	1	1	0	Known	polyA	polyA	2.30633	High	RRM_1*2	N/A	N/A	N/A	N/A	N/A	N/A	N/A
Q8IWX8	Cherp	Calcium homeostasis endoplasmic reticulum protein	protein binding|ion channel binding|poly(A) RNA binding|	cytoplasm|membrane|sarcoplasmic reticulum membrane|perinuclear region of cytoplasm|	1	0	1	1	0	1	1	0	1	1	Known	polyA	polyA	2.31267	High	Surp	CTD bind	G-patch	N/A	N/A	N/A	N/A	N/A
G5E994	Gpr107	G protein-coupled receptor 107, isoform CRA_c	N/A	integral component of membrane|	0	0	0	0	0	0	0	0	0	0	Orphan	Non-polyA	N/A	2.33033	High	Lung_7-TM_R*2	N/A	N/A	N/A	N/A	N/A	N/A	N/A
C9IYN3	Hnrnpll	Heterogeneous nuclear ribonucleoprotein L-like	nucleotide binding|RNA binding|	nucleus|viral nucleocapsid|ribonucleoprotein complex|	1	1	1	0	0	1	1	1	0	0	Known	polyA	polyA	2.33067	High	RRM_1	RRM_8	RRM_5	N/A	N/A	N/A	N/A	N/A
Q96QC0	Ppp1r10	Serine/threonine-protein phosphatase 1 regulatory subunit 10	DNA binding|protein phosphatase inhibitor activity|poly(A) RNA binding|metal ion binding|	chromatin|nucleus|nucleoplasm|PTW/PP1 phosphatase complex|	1	0	1	1	0	1	1	0	0	1	Known	polyA	polyA	2.33967	High	Med26	zf-CCCH	N/A	N/A	N/A	N/A	N/A	N/A
Q13526	Pin1	Peptidyl-prolyl cis-trans isomerase NIMA-interacting 1	peptidyl-prolyl cis-trans isomerase activity|protein binding|mitogen-activated protein kinase kinase binding|GTPase activating protein binding|phosphoserine binding|phosphothreonine binding|	nucleus|nucleoplasm|mitochondrion|cytosol|nuclear speck|midbody|neuron projection|	1	0	0	0	0	0	0	0	0	0	Known	Non-polyA	N/A	2.34467	High	WW	Rotamase	N/A	N/A	N/A	N/A	N/A	N/A
O43347	Msi1	RNA-binding protein Musashi homolog 1	nucleotide binding|RNA binding|poly(U) RNA binding|poly(A) RNA binding|	nucleus|cytoplasm|polysome|	0	1	1	1	0	1	0	0	0	1	Known	polyA	polyA	2.34633	High	RRM_1	RRM_1	N/A	N/A	N/A	N/A	N/A	N/A
Q9NRR4	Drosha	Ribonuclease 3	lipopolysaccharide binding|double-stranded RNA binding|ribonuclease III activity|protein binding|protein homodimerization activity|poly(A) RNA binding|metal ion binding|primary miRNA binding|	nucleus|nucleoplasm|nucleolus|microprocessor complex|	1	0	0	1	0	1	0	0	1	0	Known	polyA	polyA	2.35667	High	Ribonucleas_3_3	Ribonucleas_3	dsrm	N/A	N/A	N/A	N/A	N/A
P55081	Mfap1	Microfibrillar-associated protein 1	protein binding|poly(A) RNA binding|	microfibril|extracellular region|	1	0	1	1	0	0	1	0	1	1	Known	polyA	polyA	2.36433	High	Mfap1	N/A	N/A	N/A	N/A	N/A	N/A	N/A
E7EPD8	Tdp1	Tyrosyl-DNA phosphodiesterase 1	phosphoric diester hydrolase activity|	nucleus|	0	0	0	0	0	0	0	0	0	0	Orphan	Non-polyA	N/A	2.36567	High	Tyr-DNA_phospho	N/A	N/A	N/A	N/A	N/A	N/A	N/A
P38935	Ighmbp2	DNA-binding protein SMUBP-2	tRNA binding|DNA binding|DNA helicase activity|single-stranded DNA binding|RNA binding|protein binding|ATP binding|DNA-dependent ATPase activity|transcription factor binding|RNA-dependent ATPase activity|zinc ion binding|ATP-dependent 5'-3' RNA helicase activity|ribosome binding|ATP-dependent 5'-3' DNA helicase activity|	nucleus|cytoplasm|membrane|axon|growth cone|ribonucleoprotein complex|neuronal cell body|SMN complex|	0	0	1	0	0	1	0	0	0	0	Known	Non-polyA	tRNA (Gerstberger, S., et al. Nat. Rev. Genetics. 2013. )	2.371	High	AAA_11	AAA_12	R3H	zf-AN1	N/A	N/A	N/A	N/A
P85037	Foxk1	Forkhead box protein K1	RNA polymerase II regulatory region sequence-specific DNA binding|sequence-specific DNA binding RNA polymerase II transcription factor activity|protein binding|	nucleus|nucleoplasm|nucleolus|	0	0	0	0	0	0	0	0	0	0	Orphan	Non-polyA	N/A	2.37133	High	FHA	Forkhead	N/A	N/A	N/A	N/A	N/A	N/A
C9JYN0	Sypl1	Synaptophysin-like protein 1	transporter activity|	integral component of synaptic vesicle membrane|	0	0	0	0	0	0	0	0	0	0	Orphan	Non-polyA	N/A	2.37333	High	MARVEL	N/A	N/A	N/A	N/A	N/A	N/A	N/A
Q96T23	Rsf1	Remodeling and spacing factor 1	protein binding|zinc ion binding|histone binding|ATPase activity|	nucleus|nucleoplasm|RSF complex|	1	0	0	0	0	0	0	0	0	0	Known	Non-polyA	N/A	2.38233	High	WHIM1	PHD	N/A	N/A	N/A	N/A	N/A	N/A
P13984	Gtf2f2	General transcription factor IIF subunit 2	core RNA polymerase II binding transcription factor activity|DNA binding|helicase activity|protein binding|ATP binding|	nucleus|nucleoplasm|transcription factor TFIIF complex|holo TFIIH complex|microtubule cytoskeleton|	0	0	0	0	0	0	0	0	0	0	Orphan	Non-polyA	N/A	2.38567	High	TFIIF_beta_N	TFIIF_beta	N/A	N/A	N/A	N/A	N/A	N/A
Q15366	Pcbp2	Poly(rC)-binding protein 2	DNA binding|RNA binding|protein binding|enzyme binding|ubiquitin protein ligase binding|poly(A) RNA binding|	nucleus|nucleoplasm|cytoplasm|cytosol|focal adhesion|membrane|ribonucleoprotein complex|extracellular exosome|	1	1	1	1	1	1	1	1	1	0	Known	polyA	polyA	2.38933	High	KH_1*3	N/A	N/A	N/A	N/A	N/A	N/A	N/A
B1AVT0	Clk2	Dual-specificity protein kinase CLK2	protein kinase activity|ATP binding|	nucleus|nucleoplasm|	0	0	0	0	0	0	0	0	0	0	Orphan	Non-polyA	N/A	2.40067	High	Pkinase	N/A	N/A	N/A	N/A	N/A	N/A	N/A
P43243	Matr3	Matrin-3	nucleotide binding|structural molecule activity|protein binding|zinc ion binding|poly(A) RNA binding|	nuclear inner membrane|nucleoplasm|membrane|nuclear matrix|	0	0	1	1	1	1	1	1	1	1	Known	polyA	polyA	2.42267	High	RRM_5*2	N/A	N/A	N/A	N/A	N/A	N/A	N/A
O43684	Bub3	Mitotic checkpoint protein BUB3	protein binding|	kinetochore|condensed chromosome kinetochore|nucleoplasm|cytosol|	1	0	1	0	1	0	0	0	0	0	Known	Non-polyA	N/A	2.42333	High	WD40*3	N/A	N/A	N/A	N/A	N/A	N/A	N/A
Q15596	Ncoa2	Nuclear receptor coactivator 2	chromatin binding|transcription coactivator activity|histone acetyltransferase activity|protein binding|transcription factor binding|ligand-dependent nuclear receptor binding|ligand-dependent nuclear receptor transcription coactivator activity|thyroid hormone receptor coactivator activity|nuclear hormone receptor binding|protein dimerization activity|	nucleus|nucleoplasm|cytoplasm|	0	0	0	0	0	0	0	0	0	0	Orphan	Non-polyA	N/A	2.42533	High	PAS	PAS_11	NCOA_u2	SRC-1	DUF4927	Nuc_rec_co-act	DUF1518	N/A
Q9BTC0	Dido1	Death-inducer obliterator 1	zinc ion binding|poly(A) RNA binding|	nucleus|cytoplasm|spindle|	1	0	1	1	0	0	0	0	0	1	Known	polyA	polyA	2.428	High	PHD	TFIIS_M	SPOC	N/A	N/A	N/A	N/A	N/A
Q9UBB9	Tfip11	Tuftelin-interacting protein 11	DNA binding|protein binding|	proteinaceous extracellular matrix|spliceosomal complex|cytoplasm|nuclear speck|U2-type post-mRNA release spliceosomal complex|catalytic step 2 spliceosome|	0	0	0	0	0	0	0	0	0	0	Orphan	Non-polyA	N/A	2.43667	High	TIP_N	G-patch	GCFC	N/A	N/A	N/A	N/A	N/A
Q9UQR1	Znf148	Zinc finger protein 148	RNA polymerase II core promoter proximal region sequence-specific DNA binding|RNA polymerase II core promoter proximal region sequence-specific DNA binding transcription factor activity involved in negative regulation of transcription|protein binding|sequence-specific DNA binding|metal ion binding|	nucleoplasm|Golgi apparatus|	0	0	0	0	0	0	0	0	0	0	Orphan	Non-polyA	N/A	2.43767	High	zf-C2H2*3	N/A	N/A	N/A	N/A	N/A	N/A	N/A
Q8WWY3	Prpf31	U4/U6 small nuclear ribonucleoprotein Prp31	protein binding|ribonucleoprotein complex binding|poly(A) RNA binding|snRNP binding|	nucleus|U2-type spliceosomal complex|U4 snRNP|U4atac snRNP|Cajal body|nuclear speck|U4/U6 x U5 tri-snRNP complex|MLL1 complex|	1	0	1	1	0	1	0	0	1	1	Known	polyA	polyA	2.438	High	Nop	Prp31_C	N/A	N/A	N/A	N/A	N/A	N/A
Q96T58	Spen	Msx2-interacting protein	nucleotide binding|RNA polymerase II transcription factor binding|RNA polymerase II transcription factor binding transcription repressor activity|single-stranded DNA binding|sequence-specific DNA binding transcription factor activity|transcription corepressor activity|protein binding|poly(A) RNA binding|	nucleoplasm|transcriptional repressor complex|extracellular exosome|	1	1	1	1	0	1	1	1	1	1	Known	polyA	polyA	2.44267	High	RRM_1	RRM_1	RRM_1	RRM_1	SPOC	N/A	N/A	N/A
F5H2X7	Ciz1	Cip1-interacting zinc finger protein	nucleic acid binding|zinc ion binding|cyclin binding|	nucleus|	1	0	0	0	0	0	0	0	0	0	Known	Non-polyA	Xist (Sunwoo H.,et al. PNAS. 2017.)	2.44433	High	zf-C2H2_jaz	N/A	N/A	N/A	N/A	N/A	N/A	N/A
Q8TAV0	Fam76a	Protein FAM76A	NEDD8-specific protease activity|	cytoplasm|	0	0	0	0	0	0	0	0	0	0	Orphan	Non-polyA	N/A	2.456	High	FAM76	N/A	N/A	N/A	N/A	N/A	N/A	N/A
P61289	Psme3	Proteasome activator complex subunit 3	p53 binding|protein binding|identical protein binding|endopeptidase activator activity|MDM2/MDM4 family protein binding|	proteasome complex|nucleus|nucleoplasm|cytoplasm|cytosol|proteasome activator complex|membrane|	0	0	0	0	0	0	0	0	0	0	Orphan	Non-polyA	N/A	2.46133	High	PA28_alpha	PA28_beta	N/A	N/A	N/A	N/A	N/A	N/A
P57081	Wdr4	tRNA (guanine-N(7)-)-methyltransferase non-catalytic subunit WDR4	protein binding|tRNA (guanine-N7-)-methyltransferase activity|	nucleus|nucleoplasm|cytoplasm|	0	0	0	0	0	0	0	0	0	0	Orphan	Non-polyA	N/A	2.466	High	WD40	N/A	N/A	N/A	N/A	N/A	N/A	N/A
Q5VUA4	Znf318	Zinc finger protein 318	nucleic acid binding|zinc ion binding|	nucleoplasm|cytoplasm|	1	0	0	0	0	0	0	0	0	0	Known	Non-polyA	N/A	2.474	High	N/A	N/A	N/A	N/A	N/A	N/A	N/A	N/A
O15226	Nkrf	NF-kappa-B-repressing factor	DNA binding|protein binding|poly(A) RNA binding|	nucleus|nucleolus|endoplasmic reticulum|	1	1	1	1	1	0	1	0	1	1	Known	polyA	polyA	2.47833	High	G-patch	R3H	N/A	N/A	N/A	N/A	N/A	N/A
Q9UK61	Fam208a	Protein TASOR	poly(A) RNA binding|	N/A	1	0	0	0	0	0	0	0	0	0	Known	Non-polyA	N/A	2.479	High	DUF3715	N/A	N/A	N/A	N/A	N/A	N/A	N/A
Q9UJA3	Mcm8	DNA helicase MCM8	DNA binding|helicase activity|protein binding|ATP binding|	nucleus|nucleoplasm|MCM8-MCM9 complex|	0	0	0	0	0	0	0	0	0	0	Orphan	Non-polyA	N/A	2.48133	High	MCM_OB	MCM	MCM_lid	N/A	N/A	N/A	N/A	N/A
Q9H0U4	Rab1b	Ras-related protein Rab-1B	GTPase activity|protein binding|GTP binding|	Golgi membrane|mitochondrion|endoplasmic reticulum membrane|endoplasmic reticulum-Golgi intermediate compartment|Golgi apparatus|pre-autophagosomal structure membrane|extracellular exosome|	0	0	1	0	0	0	0	0	0	0	Known	Non-polyA	viral RNA (Fernandez-Chamorro J., et al. Life. Sci. Alliance. 2019.)	2.48367	High	Ras	N/A	N/A	N/A	N/A	N/A	N/A	N/A
Q13435	Sf3b2	Splicing factor 3B subunit 2	protein binding|poly(A) RNA binding|	nucleoplasm|spliceosomal complex|U12-type spliceosomal complex|catalytic step 2 spliceosome|	1	1	1	1	1	0	0	0	1	1	Known	polyA	polyA	2.49033	High	SAP	DUF382	PSP	N/A	N/A	N/A	N/A	N/A
Q12830	Bptf	Nucleosome-remodeling factor subunit BPTF	protein binding|transcription factor binding|zinc ion binding|sequence-specific DNA binding|DNA-dependent ATPase activity|	nucleus|nucleoplasm|cytoplasm|NURF complex|extracellular exosome|	1	0	1	0	0	0	0	0	0	0	Known	Non-polyA	N/A	2.495	High	DDT	PHD*2	WSD	bromodomain	N/A	N/A	N/A	N/A
O75832	Psmd10	26S proteasome non-ATPase regulatory subunit 10	protein binding|transcription factor binding|	proteasome complex|nucleus|nucleoplasm|cytoplasm|cytosol|proteasome regulatory particle|intermediate filament cytoskeleton|proteasome regulatory particle, base subcomplex|	0	0	0	0	0	0	0	0	0	0	Orphan	Non-polyA	N/A	2.49667	High	Ank2*2	Ank4*2	N/A	N/A	N/A	N/A	N/A	N/A
Q9NW64	Rbm22	Pre-mRNA-splicing factor RBM22	nucleotide binding|nucleocytoplasmic transporter activity|protein binding|snRNA binding|pre-mRNA binding|poly(A) RNA binding|metal ion binding|calcium-dependent protein binding|	nucleus|nucleoplasm|cytoplasm|catalytic step 2 spliceosome|	1	1	1	1	0	1	1	1	1	1	Known	polyA	polyA	2.50267	High	RRM_1	N/A	N/A	N/A	N/A	N/A	N/A	N/A
Q00839	Hnrnpu	Heterogeneous nuclear ribonucleoprotein U	core promoter binding|DNA binding|RNA binding|protein binding|ATP binding|poly(A) RNA binding|	nucleus|nucleoplasm|cell surface|membrane|ribonucleoprotein complex|cytoplasmic ribonucleoprotein granule|CRD-mediated mRNA stability complex|catalytic step 2 spliceosome|	1	1	1	1	1	1	1	1	1	1	Known	polyA	polyA	2.503	High	SAP	SPRY	AAA_33	N/A	N/A	N/A	N/A	N/A
Q04726-3	Tle3	Isoform 3 of Transducin-like enhancer protein 3	protein binding|	nucleus|nucleoplasm|	1	0	0	0	0	0	0	0	0	0	Known	Non-polyA	N/A	2.504	High	TLE_N	WD40	WD40	N/A	N/A	N/A	N/A	N/A
Q9BY77	Poldip3	Polymerase delta-interacting protein 3	nucleotide binding|protein binding|poly(A) RNA binding|	nucleoplasm|cytoplasm|nuclear speck|intracellular membrane-bounded organelle|transcription export complex|exon-exon junction complex|	1	1	1	1	0	1	1	1	1	1	Known	polyA	polyA	2.50967	High	RRM_1	N/A	N/A	N/A	N/A	N/A	N/A	N/A
Q9UH99	Sun2	SUN domain-containing protein 2	protein binding|lamin binding|microtubule binding|identical protein binding|protein anchor|	nuclear chromosome, telomeric region|condensed nuclear chromosome|nuclear envelope|integral component of nuclear inner membrane|endosome membrane|nuclear membrane|LINC complex|	0	0	0	0	0	0	0	0	0	0	Orphan	Non-polyA	N/A	2.513	Moderate	HTH_SUN2	Sad1_UNC	N/A	N/A	N/A	N/A	N/A	N/A
Q12972	Ppp1r8	Nuclear inhibitor of protein phosphatase 1	DNA binding|RNA binding|endonuclease activity|protein serine/threonine phosphatase inhibitor activity|protein binding|protein phosphatase type 1 regulator activity|ribonuclease E activity|	nucleus|nucleoplasm|spliceosomal complex|cytoplasm|nuclear speck|	0	0	0	0	0	1	0	0	0	0	Known	Non-polyA	pre-mRNA (Beullens M., et al. J. Biol. Chem. 2012.)	2.51433	Moderate	FHA	N/A	N/A	N/A	N/A	N/A	N/A	N/A
Q8TEX9	Ipo4	Importin-4	protein binding|Ran GTPase binding|	nuclear chromatin|cytoplasm|membrane|protein complex|nuclear pore|	1	0	1	0	1	0	0	0	0	0	Known	Non-polyA	mRNA (Gerstberger, S., et al. Nat. Rev. Genetics. 2005. )	2.525	Moderate	IBN_N	HEAT	N/A	N/A	N/A	N/A	N/A	N/A
Q9GZM5	Yipf3	Protein YIPF3	protein binding|	nucleoplasm|Golgi apparatus|plasma membrane|integral component of membrane|transport vesicle|intracellular membrane-bounded organelle|	0	0	0	0	0	0	0	0	0	0	Orphan	Non-polyA	N/A	2.53233	Moderate	N/A	N/A	N/A	N/A	N/A	N/A	N/A	N/A
P25789	Psma4	Proteasome subunit alpha type-4	endopeptidase activity|threonine-type endopeptidase activity|protein binding|	proteasome complex|cytoplasmic mRNA processing body|nucleus|nucleoplasm|cytoplasm|cytosol|proteasome core complex|plasma membrane|proteasome core complex, alpha-subunit complex|intracellular membrane-bounded organelle|extracellular exosome|	0	1	0	0	0	0	0	1	0	0	Known	polyA	polyA	2.53867	Moderate	Proteasome_A_N	Proteasome	N/A	N/A	N/A	N/A	N/A	N/A
P29401	Tkt	Transketolase	transketolase activity|protein homodimerization activity|metal ion binding|cofactor binding|	nucleus|nucleoplasm|peroxisome|cytosol|vesicle|myelin sheath|extracellular exosome|	1	0	0	0	1	0	0	1	0	0	Known	polyA	polyA	2.53967	Moderate	Transketolase_N	Transket_pyr	Transketolase_C	N/A	N/A	N/A	N/A	N/A
Q2TAL8	Qrich1	Glutamine-rich protein 1	protein binding|	nucleoplasm|	0	0	0	0	0	0	0	0	0	0	Orphan	Non-polyA	N/A	2.543	Moderate	DUF3504	N/A	N/A	N/A	N/A	N/A	N/A	N/A
P29372	Mpg	DNA-3-methyladenine glycosylase	damaged DNA binding|alkylbase DNA N-glycosylase activity|protein binding|DNA-3-methyladenine glycosylase activity|DNA-7-methylguanine glycosylase activity|DNA-7-methyladenine glycosylase activity|DNA-3-methylguanine glycosylase activity|	nucleoplasm|mitochondrial nucleoid|	1	0	0	0	0	0	0	0	0	1	Known	polyA	polyA	2.549	Moderate	Pur_DNA_glyco	N/A	N/A	N/A	N/A	N/A	N/A	N/A
Q8NI27	Thoc2	THO complex subunit 2	RNA binding|protein binding|	transcription export complex|THO complex|THO complex part of transcription export complex|nucleoplasm|nuclear speck|	1	0	0	0	1	1	0	0	0	0	Known	Non-polyA	mRNA (Gerstberger, S., et al. Nat. Rev. Genetics. 2007. )	2.557	Moderate	THOC2_N*2	Thoc2	Tho2	N/A	N/A	N/A	N/A	N/A
Q9H7Z3	Nrde2	Protein NRDE2 homolog	N/A	N/A	0	0	0	0	0	0	0	0	0	0	Orphan	Non-polyA	N/A	2.56167	Moderate	NRDE-2	N/A	N/A	N/A	N/A	N/A	N/A	N/A
O95376	Arih2	E3 ubiquitin-protein ligase ARIH2	nucleic acid binding|ubiquitin-protein transferase activity|protein binding|zinc ion binding|ligase activity|	nucleus|cytoplasm|	0	0	0	0	0	0	0	0	0	0	Orphan	Non-polyA	N/A	2.56233	Moderate	IBR*2	N/A	N/A	N/A	N/A	N/A	N/A	N/A
Q6PJT7	Zc3h14	Zinc finger CCCH domain-containing protein 14	protein binding|poly(A) binding|poly(A) RNA binding|metal ion binding|	nucleus|nucleoplasm|nucleolus|cytoplasm|nuclear speck|	1	1	1	1	0	1	1	0	1	0	Known	polyA	polyA	2.563	Moderate	zf-CCCH*4	N/A	N/A	N/A	N/A	N/A	N/A	N/A
Q9BYW2	Setd2	Histone-lysine N-methyltransferase SETD2	protein binding|histone-lysine N-methyltransferase activity|histone methyltransferase activity (H3-K36 specific)|	nucleoplasm|chromosome|	1	0	0	0	0	0	0	0	0	0	Known	Non-polyA	mRNA (Yoh S.M., et al. Genes & Development. 2008.)	2.56867	Moderate	AWS	SET	WW	SRI	N/A	N/A	N/A	N/A
Q9H0C8	Ilkap	Integrin-linked kinase-associated serine/threonine phosphatase 2C	protein serine/threonine phosphatase activity|protein binding|metal ion binding|	cytoplasm|	0	0	0	0	0	0	0	0	0	0	Orphan	Non-polyA	N/A	2.56867	Moderate	PP2C	N/A	N/A	N/A	N/A	N/A	N/A	N/A
Q15691	Mapre1	Microtubule-associated protein RP/EB family member 1	protein binding|protein C-terminus binding|poly(A) RNA binding|microtubule plus-end binding|	cytoplasm|Golgi apparatus|centrosome|cytosol|microtubule|cytoplasmic microtubule|cortical microtubule cytoskeleton|cell projection membrane|microtubule plus-end|spindle|	1	0	1	1	0	0	0	0	0	0	Known	polyA	polyA	2.57033	Moderate	CH	EB1	N/A	N/A	N/A	N/A	N/A	N/A
O75150	Rnf40	E3 ubiquitin-protein ligase BRE1B	mRNA 3'-UTR binding|protein binding|zinc ion binding|ligase activity|syntaxin-1 binding|ubiquitin conjugating enzyme binding|ubiquitin protein ligase binding|protein complex binding|protein homodimerization activity|ubiquitin-protein transferase activity|	ubiquitin ligase complex|nucleus|nucleoplasm|cytosol|membrane|extrinsic component of membrane|HULC complex|neuron projection|axon terminus|	1	0	0	0	0	1	0	0	0	0	Known	Non-polyA	N/A	2.57067	Moderate	zf-C3HC4_3	N/A	N/A	N/A	N/A	N/A	N/A	N/A
Q6PD62	Ctr9	RNA polymerase-associated protein CTR9 homolog	RNA polymerase II core binding|protein binding|SH2 domain binding|	Cdc73/Paf1 complex|nuclear speck|transcriptionally active chromatin|	1	0	1	0	0	0	0	0	0	0	Known	Non-polyA	mRNA (Mueller C.L., et al. Mol. Cell. Biol. 2002.)	2.57433	Moderate	TPR_8	TPR_7	TPR_8	N/A	N/A	N/A	N/A	N/A
P55265	Adar	Double-stranded RNA-specific adenosine deaminase	DNA binding|double-stranded RNA adenosine deaminase activity|protein binding|poly(A) RNA binding|metal ion binding|	nucleus|nucleoplasm|nucleolus|cytoplasm|membrane|supraspliceosomal complex|	1	1	1	1	1	1	1	1	1	1	Known	polyA	polyA	2.581	Moderate	z-alpha	dsrm*3	A deamin	z-alpha	N/A	N/A	N/A	N/A
Q15326	Zmynd11	Zinc finger MYND domain-containing protein 11	DNA binding|transcription corepressor activity|protein binding|zinc ion binding|methylated histone binding|	nucleus|nucleoplasm|chromosome|	0	0	0	0	0	0	0	0	0	0	Orphan	Non-polyA	N/A	2.58167	Moderate	Bromodomain	PWWP	N/A	N/A	N/A	N/A	N/A	N/A
A0A075B7G6	Znf100	Zinc finger protein 100	nucleic acid binding|metal ion binding|	intracellular|	0	0	0	0	0	0	0	0	0	0	Orphan	Non-polyA	N/A	2.583	Moderate	KRAB	zf-C2H2*11	N/A	N/A	N/A	N/A	N/A	N/A
Q92794	Kat6a	Histone acetyltransferase KAT6A	DNA binding|chromatin binding|transcription coactivator activity|histone acetyltransferase activity|protein binding|transcription factor binding|zinc ion binding|acetyltransferase activity|	nucleosome|nucleus|nucleoplasm|nucleolus|Golgi apparatus|PML body|MOZ/MORF histone acetyltransferase complex|	0	0	0	0	0	0	0	0	0	0	Orphan	Non-polyA	N/A	2.586	Moderate	PHD_2	zf-MYST	MOZ_SAS	N/A	N/A	N/A	N/A	N/A
Q9H5H4	Znf768	Zinc finger protein 768	DNA binding|poly(A) RNA binding|metal ion binding|	DNA-directed RNA polymerase II, core complex|	0	0	1	1	0	0	0	0	0	0	Known	polyA	polyA	2.59167	Moderate	RNA_pol_Rpb1_R*4	zf-C2H2*10	N/A	N/A	N/A	N/A	N/A	N/A
P17482	Hoxb9	Homeobox protein Hox-B9	protein binding|sequence-specific DNA binding|	nucleoplasm|mitochondrion|	0	0	0	0	0	0	0	0	0	0	Orphan	Non-polyA	N/A	2.593	Moderate	Hox9_act	Homeodomain	N/A	N/A	N/A	N/A	N/A	N/A
A0A0A0MT49	Smarca4	Transcription activator BRG1	ATP binding|ATPase activity|histone binding|	SWI/SNF complex|	0	0	0	0	0	1	0	0	0	0	Known	Non-polyA	lncRNA (Cajigas I., et al. Development. 2015.)	2.59367	Moderate	QLQ	HAS	BRK	SNF2_N	Helicase C	SnAC	Bromodomain	N/A
O43390-2	Hnrnpr	Isoform 2 of Heterogeneous nuclear ribonucleoprotein R	nucleotide binding|RNA binding|protein binding|poly(A) RNA binding|	nucleoplasm|spliceosomal complex|cytoplasm|ribonucleoprotein complex|catalytic step 2 spliceosome|nucleolus|	1	1	0	1	1	1	1	1	1	1	Known	polyA	polyA	2.59767	Moderate	N/A	N/A	N/A	N/A	N/A	N/A	N/A	N/A
Q9BXF3	Cecr2	Cat eye syndrome critical region protein 2	protein binding|	nucleus|nuclear euchromatin|CERF complex|	0	0	0	0	0	0	0	0	0	0	Orphan	Non-polyA	N/A	2.59967	Moderate	Bromodomain	N/A	N/A	N/A	N/A	N/A	N/A	N/A
A0A0A0MQR2	Ftf2	Protein RTF2 homolog	N/A	N/A	0	0	0	0	0	0	0	0	0	0	Orphan	Non-polyA	N/A	2.6	Moderate	Rtf2	N/A	N/A	N/A	N/A	N/A	N/A	N/A
Q9UNY4	Ttf2	Transcription termination factor 2	DNA binding|protein binding|ATP binding|ATP-dependent helicase activity|DNA-dependent ATPase activity|zinc ion binding|	spliceosomal complex|cytoplasm|transcription elongation factor complex|	0	0	0	0	0	0	0	0	0	0	Orphan	Non-polyA	N/A	2.60433	Moderate	zf-GRF	SNF2_N	Helicase_C	N/A	N/A	N/A	N/A	N/A
Q8N5P1	Zc3h8	Zinc finger CCCH domain-containing protein 8	RNA polymerase II intronic transcription regulatory region sequence-specific DNA binding|RNA polymerase II transcription regulatory region sequence-specific DNA binding transcription factor activity involved in negative regulation of transcription|sequence-specific DNA binding transcription factor activity|protein binding|sequence-specific DNA binding|poly(A) RNA binding|metal ion binding|	nucleus|transcription elongation factor complex|Cajal body|transcriptionally active chromatin|histone locus body|	1	1	1	1	0	1	1	0	1	0	Known	polyA	polyA	2.60633	Moderate	zf-CCCH	zf-CCCH_4	zf-CCCH_2	N/A	N/A	N/A	N/A	N/A
Q9UKB1	Fbxw11	F-box/WD repeat-containing protein 11	ubiquitin-protein transferase activity|protein binding|protein dimerization activity|ubiquitin protein ligase activity|	ubiquitin ligase complex|nucleus|centrosome|cytosol|SCF ubiquitin ligase complex|	0	0	0	0	0	0	0	0	0	0	Orphan	Non-polyA	N/A	2.61267	Moderate	Beta-TrCP_D	F-box-like	WD40*7	N/A	N/A	N/A	N/A	N/A
P23193	Tcea1	Transcription elongation factor A protein 1	DNA binding|protein binding|zinc ion binding|	nucleus|nucleoplasm|nucleolus|	1	0	1	0	0	0	0	1	0	0	Known	polyA	polyA	2.61733	Moderate	Med26	TFIIS_M	TFIIS_C	N/A	N/A	N/A	N/A	N/A
Q92620	Dhx38	Pre-mRNA-splicing factor ATP-dependent RNA helicase PRP16	ATP-dependent RNA helicase activity|protein binding|ATP binding|poly(A) RNA binding|	nucleus|nucleoplasm|cytoplasm|membrane|catalytic step 2 spliceosome|	0	0	1	1	0	1	0	0	0	1	Known	polyA	polyA	2.61833	Moderate	DEAD	Helicase_C	HA2	OB_NTP_bind	N/A	N/A	N/A	N/A
Q7KZ85	Supt6h	Transcription elongation factor SPT6	DNA binding|sequence-specific DNA binding transcription factor activity|protein binding|histone binding|poly(A) RNA binding|	nucleus|	1	1	1	1	1	0	1	0	1	1	Known	polyA	polyA	2.62067	Moderate	SPT6_acidic	HTH_44	YqgF	HHH_7	DLD	S1	SH2_2	N/A
Q86X55	Carm1	Histone-arginine methyltransferase CARM1	transcription coactivator activity|protein binding|beta-catenin binding|protein methyltransferase activity|histone-arginine N-methyltransferase activity|protein-arginine N-methyltransferase activity|ligand-dependent nuclear receptor transcription coactivator activity|protein-arginine omega-N asymmetric methyltransferase activity|histone methyltransferase activity (H3-R17 specific)|histone methylt…	nucleus|nucleoplasm|cytoplasm|cytosol|	1	0	1	0	0	0	0	0	0	0	Known	Non-polyA	pre-mRNA (Kuhn P., et al. Nucleic. Acids. Res. 2011.)	2.62433	Moderate	Carm1	PrmA	N/A	N/A	N/A	N/A	N/A	N/A
Q5T8P6-2	Rbm26	Isoform 2 of RNA-binding protein 26	nucleotide binding|protein binding|poly(A) RNA binding|metal ion binding|	N/A	1	0	1	1	0	1	0	0	1	1	Known	polyA	polyA	2.62467	Moderate	N/A	N/A	N/A	N/A	N/A	N/A	N/A	N/A
Q2TAY7	Smu1	WD40 repeat-containing protein SMU1	protein binding|	nucleus|cytoplasm|	1	0	1	0	0	0	0	0	0	0	Known	Non-polyA	pre-mRNA (Keiper S., et al. Nat. Commun. 2019.)	2.62567	Moderate	LisH_TPL	WD40*5	N/A	N/A	N/A	N/A	N/A	N/A
Q9H814	Phax	Phosphorylated adapter RNA export protein	RNA binding|toxic substance binding|	nucleus|nucleoplasm|nucleolus|cytosol|Cajal body|neuronal cell body|intracellular membrane-bounded organelle|	0	0	0	0	0	1	0	0	0	0	Known	Non-polyA	snoRNA (Boulon S., et al. Mol. Cell. 2004.)	2.62733	Moderate	RNA_GG_bind	N/A	N/A	N/A	N/A	N/A	N/A	N/A
Q16527	Csrp2	Cysteine and glycine-rich protein 2	protein binding|zinc ion binding|	nucleus|focal adhesion|	1	0	0	0	0	0	0	0	0	0	Known	Non-polyA	N/A	2.62967	Moderate	LIM*2	N/A	N/A	N/A	N/A	N/A	N/A	N/A
Q9P265	Dip2b	Disco-interacting protein 2 homolog B	catalytic activity|transcription factor binding|	nucleus|cytoplasm|membrane|extracellular exosome|	1	0	0	0	0	0	0	0	0	0	Known	Non-polyA	N/A	2.63033	Moderate	DMAP_binding	AMP_binding	N/A	N/A	N/A	N/A	N/A	N/A
P25205	Mcm3	DNA replication licensing factor MCM3	DNA binding|DNA helicase activity|protein binding|ATP binding|	nucleus|nucleoplasm|alpha DNA polymerase:primase complex|centrosome|membrane|MCM complex|intracellular membrane-bounded organelle|perinuclear region of cytoplasm|	1	0	1	0	1	0	0	0	0	0	Known	Non-polyA	N/A	2.64233	Moderate	MCM_N	MCM_OB	MCM	N/A	N/A	N/A	N/A	N/A
Q9UBU9	Nxf1	Nuclear RNA export factor 1	nucleotide binding|single-stranded RNA binding|protein binding|poly(A) RNA binding|	nucleus|nucleoplasm|cytosol|nuclear speck|transcription export complex|	1	0	1	1	1	1	0	0	1	1	Known	polyA	polyA	2.64833	Moderate	Tap-RNA_bind	LRR_1	NTF2	TAP_C	N/A	N/A	N/A	N/A
Q96GX5	Mastl	Serine/threonine-protein kinase greatwall	protein serine/threonine kinase activity|ATP binding|kinase activity|protein phosphatase 2A binding|	nucleus|nucleoplasm|cytoplasm|centrosome|cleavage furrow|	0	0	0	0	0	0	0	0	0	0	Orphan	Non-polyA	N/A	2.64867	Moderate	Pkinase	Pkinase	N/A	N/A	N/A	N/A	N/A	N/A
F8WDV0	Ipo11	Importin-11	Ran GTPase binding|	intracellular|	0	0	0	0	0	0	0	0	0	0	Orphan	Non-polyA	N/A	2.65367	Moderate	IBN_N	N/A	N/A	N/A	N/A	N/A	N/A	N/A
F2Z2W7	Trmt2a	tRNA (uracil-5-)-methyltransferase homolog A	nucleotide binding|nucleic acid binding|RNA methyltransferase activity|	N/A	0	0	0	0	0	1	1	0	1	0	Known	polyA	polyA	2.654	Moderate	Methyltransf_31	N/A	N/A	N/A	N/A	N/A	N/A	N/A
Q15717	Elavl1	ELAV-like protein 1	nucleotide binding|RNA binding|double-stranded RNA binding|mRNA binding|mRNA 3'-UTR binding|protein binding|AU-rich element binding|protein kinase binding|mRNA 3'-UTR AU-rich region binding|poly(A) RNA binding|	nucleus|nucleoplasm|cytoplasm|cytosol|membrane|	1	1	1	1	1	1	1	0	1	1	Known	polyA	polyA	2.65767	Moderate	RRM_1*3	N/A	N/A	N/A	N/A	N/A	N/A	N/A
Q9HAU5	Upf2	Regulator of nonsense transcripts 2	RNA binding|protein binding|	nucleus|cytoplasm|cytosol|exon-exon junction complex|perinuclear region of cytoplasm|	0	0	1	0	0	1	0	0	0	1	Known	polyA	polyA	2.65767	Moderate	MIF4G*3	Upf2	N/A	N/A	N/A	N/A	N/A	N/A
F5GZS6	Slc3a2	4F2 cell-surface antigen heavy chain	catalytic activity|cation binding|	nucleus|nucleoplasm|cytoplasm|plasma membrane|	0	0	1	0	1	1	0	0	1	1	Known	polyA	polyA	2.65767	Moderate	SLC3A2_N	Alpha-amylase	N/A	N/A	N/A	N/A	N/A	N/A
Q12872	Sfswap	Splicing factor, suppressor of white-apricot homolog	RNA binding|	nucleus|	1	0	0	0	0	1	0	0	0	0	Known	Non-polyA	mRNA (Gerstberger, S., et al. Nat. Rev. Genetics. 2011. )	2.66467	Moderate	DRY_EERY	Surp	Surp	N/A	N/A	N/A	N/A	N/A
Q9NVM9	Asun	Integrator complex subunit 13	protein binding|	nucleus|cytoplasm|	0	0	0	0	0	0	0	0	0	0	Orphan	Non-polyA	N/A	2.667	Moderate	DUF2151	N/A	N/A	N/A	N/A	N/A	N/A	N/A
Q53EL6	Pdcd4	Programmed cell death protein 4	RNA binding|protein binding|	nucleus|nucleoplasm|cytoplasm|cytosol|	1	0	1	0	0	1	0	0	0	0	Known	Non-polyA	mRNA (Fehler O., et al. Nucleic. Acids. Res. 2014.)	2.668	Moderate	MA3*2	N/A	N/A	N/A	N/A	N/A	N/A	N/A
Q8WVD3	Rnf138	E3 ubiquitin-protein ligase RNF138	protein binding|zinc ion binding|ligase activity|protein kinase binding|ubiquitin conjugating enzyme binding|ubiquitin protein ligase activity|	nucleus|	0	0	0	0	0	0	0	0	0	0	Orphan	Non-polyA	N/A	2.67167	Moderate	zf-C3HC4_2	zf_C2HC_14	zf-Di19	N/A	N/A	N/A	N/A	N/A
Q2KHR3	Qser1	Glutamine and serine-rich protein 1	N/A	N/A	0	0	0	0	0	0	0	0	0	0	Orphan	Non-polyA	N/A	2.679	Moderate	DUF4211	N/A	N/A	N/A	N/A	N/A	N/A	N/A
F2Z3G4	Kpna1	Importin subunit alpha-5	protein transporter activity|	nucleus|nucleoplasm|cytoplasm|	1	0	0	0	0	0	0	0	0	0	Known	Non-polyA	N/A	2.67967	Moderate	IBB	N/A	N/A	N/A	N/A	N/A	N/A	N/A
Q8IUH3-3	Rbm45	Isoform 3 of RNA-binding protein 45	nucleotide binding|RNA binding|protein binding|poly(A) RNA binding|	nucleus|nucleoplasm|cytoplasm|	1	0	1	1	0	1	1	1	1	1	Known	polyA	polyA	2.687	Moderate	RRM_1	RRM_1	RRM_1	RRM_1	N/A	N/A	N/A	N/A
P35269	Gtf2f1	General transcription factor IIF subunit 1	DNA binding|transcription coactivator activity|catalytic activity|protein binding|transcription factor binding|phosphatase activator activity|poly(A) RNA binding|	nucleus|nucleoplasm|transcription factor TFIIF complex|cell junction|	1	0	1	1	0	0	0	0	1	0	Known	polyA	polyA	2.69167	Moderate	TFIIF_alpha	N/A	N/A	N/A	N/A	N/A	N/A	N/A
Q96GD4	Aurkb	Aurora kinase B	protein serine/threonine kinase activity|protein serine/threonine/tyrosine kinase activity|protein binding|ATP binding|histone serine kinase activity|metal ion binding|	condensed chromosome, centromeric region|condensed nuclear chromosome, centromeric region|nucleus|spindle|cytosol|spindle microtubule|chromocenter|midbody|spindle pole centrosome|chromosome passenger complex|spindle midzone|kinetochore|	0	0	0	0	0	0	0	0	0	0	Orphan	Non-polyA	N/A	2.694	Moderate	Pkinase	N/A	N/A	N/A	N/A	N/A	N/A	N/A
P08243	Asns	Asparagine synthetase [glutamine-hydrolyzing]	asparagine synthase (glutamine-hydrolyzing) activity|protein binding|ATP binding|protein homodimerization activity|cofactor binding|	cytosol|	1	0	1	0	1	0	0	0	0	0	Known	Non-polyA	tRNA (van Heeke G., et al. J. Biol. Chem. 1989.)	2.69633	Moderate	GATase_7	N/A	N/A	N/A	N/A	N/A	N/A	N/A
A0A0D9SEY1	Map4k4	Mitogen-activated protein kinase kinase kinase kinase 4	ATP binding|MAP kinase kinase kinase kinase activity|	intracellular|	1	0	0	0	0	0	0	0	0	0	Known	Non-polyA	N/A	2.69833	Moderate	Pkinase	CNH	N/A	N/A	N/A	N/A	N/A	N/A
P63241	Eif5a	Eukaryotic translation initiation factor 5A-1	RNA binding|translation elongation factor activity|protein binding|U6 snRNA binding|ribosome binding|poly(A) RNA binding|protein N-terminus binding|	nucleus|annulate lamellae|nuclear pore|cytoplasm|endoplasmic reticulum membrane|cytosol|membrane|extracellular exosome|	0	1	1	1	1	1	0	0	0	1	Known	polyA	polyA	2.699	Moderate	eIF-5a	N/A	N/A	N/A	N/A	N/A	N/A	N/A
Q96EY4	Tma16	Translation machinery-associated protein 16	protein binding|	nucleus|nucleolus|	1	0	1	0	0	0	0	0	0	0	Known	Non-polyA	mRNA (Gaudet P., et al. Brief. Bioinformatics. 2011.)	2.7	Moderate	Tma16	N/A	N/A	N/A	N/A	N/A	N/A	N/A
P35080	Pfn2	Profilin-2	adenyl-nucleotide exchange factor activity|actin monomer binding|protein binding|phosphatidylinositol-4,5-bisphosphate binding|	cytoplasm|cytoskeleton|terminal bouton|extracellular exosome|	1	0	0	0	0	0	0	0	0	0	Known	Non-polyA	N/A	2.70167	Moderate	Profilin	N/A	N/A	N/A	N/A	N/A	N/A	N/A
O43148	Rnmt	mRNA cap guanine-N7 methyltransferase	RNA binding|mRNA (guanine-N7-)-methyltransferase activity|protein binding|	nucleus|nucleoplasm|nucleolus|mRNA cap binding complex|receptor complex|	0	0	1	0	0	1	0	0	0	1	Known	polyA	polyA	2.707	Moderate	Pox_MCEL	N/A	N/A	N/A	N/A	N/A	N/A	N/A
P12270	Tpr	Nucleoprotein TPR	chromatin binding|mRNA binding|nucleocytoplasmic transporter activity|protein binding|tubulin binding|heat shock protein binding|protein homodimerization activity|poly(A) RNA binding|mitogen-activated protein kinase binding|dynein complex binding|transporter activity|protein anchor|	kinetochore|nucleus|nuclear envelope|nuclear pore|nucleoplasm|cytoplasm|cytoplasmic dynein complex|extrinsic component of membrane|nuclear membrane|nuclear periphery|nuclear inclusion body|nuclear pore nuclear basket|mitotic spindle|kinetochore|kinetochore|	1	0	1	0	0	1	0	0	1	0	Known	polyA	polyA	2.708	Moderate	TPR_MLP1_2	N/A	N/A	N/A	N/A	N/A	N/A	N/A
Q6P1J9	Cdc73	Parafibromin	RNA polymerase II core binding|protein binding|	nucleus|nucleoplasm|Cdc73/Paf1 complex|	1	0	0	0	0	0	0	0	0	0	Known	Non-polyA	N/A	2.711	Moderate	CDC73_N	CDC73_C	N/A	N/A	N/A	N/A	N/A	N/A
O75663	Tiprl	TIP41-like protein	protein binding|	cytoplasm|intracellular membrane-bounded organelle|	0	0	0	0	0	0	0	0	0	0	Orphan	Non-polyA	N/A	2.72467	Moderate	TIP41	N/A	N/A	N/A	N/A	N/A	N/A	N/A
Q6PL18	Atad2	ATPase family AAA domain-containing protein 2	chromatin binding|ATP binding|ATPase activity|histone binding|	nucleus|nucleoplasm|extracellular exosome|	1	0	0	0	0	0	0	0	0	0	Known	Non-polyA	N/A	2.72733	Moderate	AAA	AAA_lid_3	Bromodomain	N/A	N/A	N/A	N/A	N/A
Q9C0B1	Fto	Alpha-ketoglutarate-dependent dioxygenase FTO	ferrous iron binding|oxidative RNA demethylase activity|oxidative DNA demethylase activity|DNA-N1-methyladenine dioxygenase activity|	nucleus|nuclear speck|	0	0	0	0	0	0	0	0	0	0	Orphan	Non-polyA	N/A	2.73033	Moderate	FTO_NTD	FTO_CTD	N/A	N/A	N/A	N/A	N/A	N/A
Q9H2Y7	Znf106	Zinc finger protein 106	opioid peptide activity|SH3 domain binding|poly(A) RNA binding|metal ion binding|	nucleolus|cytosol|membrane|	1	0	0	0	0	0	1	0	0	1	Known	polyA	polyA	2.73133	Moderate	WD40*2	N/A	N/A	N/A	N/A	N/A	N/A	N/A
Q9BWU0	Slc4a1ap	Kanadaptin	protein binding|	nucleus|nucleoplasm|cytoplasm|plasma membrane|intracellular membrane-bounded organelle|	1	0	0	0	0	1	0	0	0	0	Known	Non-polyA	mRNA (Xu Q., et al. Plos one. 2014.)	2.73267	Moderate	FHA	N/A	N/A	N/A	N/A	N/A	N/A	N/A
Q8NEF9	Srfbp1	Serum response factor-binding protein 1	poly(A) RNA binding|	nucleus|90S preribosome|perinuclear region of cytoplasm|	0	0	1	1	0	0	0	0	1	1	Known	polyA	polyA	2.73667	Moderate	BUD22	N/A	N/A	N/A	N/A	N/A	N/A	N/A
Q5VWN6	Fam208b	Protein FAM208B	protein binding|	nucleus|nucleoplasm|cytoplasm|	1	0	0	0	0	0	0	0	0	0	Known	Non-polyA	N/A	2.73933	Moderate	DUF3699	DUF3715	DUF3715	N/A	N/A	N/A	N/A	N/A
Q9Y263	Plaa	Phospholipase A-2-activating protein	protein binding|phospholipase A2 activator activity|	extracellular exosome|	1	0	0	0	0	0	0	0	0	0	Known	Non-polyA	N/A	2.74033	Moderate	WD40*6	PFU	PUL	N/A	N/A	N/A	N/A	N/A
P52272	Hnrnpm	Heterogeneous nuclear ribonucleoprotein M	nucleotide binding|RNA binding|protein binding|protein domain specific binding|poly(A) RNA binding|	nucleoplasm|spliceosomal complex|nucleolus|integral component of plasma membrane|membrane|nuclear matrix|extracellular matrix|paraspeckles|extracellular exosome|catalytic step 2 spliceosome|	1	1	1	1	1	1	1	1	1	1	Known	polyA	polyA	2.741	Moderate	RRM_1*3	HnRNP_M	N/A	N/A	N/A	N/A	N/A	N/A
Q92922	Smarcc1	SWI/SNF complex subunit SMARCC1	transcription coactivator activity|protein binding|protein N-terminus binding|RNA polymerase II core promoter proximal region sequence-specific DNA binding|RNA polymerase II distal enhancer sequence-specific DNA binding|nucleosomal DNA binding|	nuclear chromatin|XY body|nucleoplasm|SWI/SNF complex|protein complex|npBAF complex|nBAF complex|	1	0	0	0	0	0	0	0	0	0	Known	Non-polyA	N/A	2.74267	Moderate	SWIRM-assoc_2	SWIRM	Myb_DNA-binding	SWIRM-assoc_3	SWIRM-assoc_1	N/A	N/A	N/A
P07910-2	Hnrnpc	Isoform C1 of Heterogeneous nuclear ribonucleoproteins C1/C2	nucleotide binding|RNA polymerase II core promoter proximal region sequence-specific DNA binding|RNA polymerase II distal enhancer sequence-specific DNA binding|RNA binding|mRNA 3'-UTR binding|protein binding|poly(U) RNA binding|nucleosomal DNA binding|identical protein binding|poly(A) RNA binding|N6-methyladenosine-containing RNA binding|	nuclear chromatin|nucleus|nucleoplasm|spliceosomal complex|cytosol|membrane|protein complex|extracellular exosome|catalytic step 2 spliceosome|	1	1	1	1	1	1	1	1	1	0	Known	polyA	polyA	2.74367	Moderate	RRM_1	N/A	N/A	N/A	N/A	N/A	N/A	N/A
Q96RS6	Nudcd1	NudC domain-containing protein 1	protein binding|	nucleus|nucleoplasm|cytoplasm|	0	0	0	0	0	0	0	0	0	0	Orphan	Non-polyA	N/A	2.74533	Moderate	CS	N/A	N/A	N/A	N/A	N/A	N/A	N/A
Q14191	Wrn	Werner syndrome ATP-dependent helicase	magnesium ion binding|Y-form DNA binding|bubble DNA binding|DNA binding|DNA helicase activity|ATP-dependent DNA helicase activity|helicase activity|exonuclease activity|protein binding|ATP binding|3'-5' exonuclease activity|four-way junction helicase activity|ATPase activity|manganese ion binding|protein complex binding|protein homodimerization activity|3'-5' DNA helicase activity|ATP-dependent 3…	nucleoplasm|nucleolus|centrosome|MutLalpha complex|	0	0	0	0	0	0	0	0	0	0	Orphan	Non-polyA	N/A	2.74633	Moderate	DNA_pol_A_exo1	DEAD	Helicase C	RecQ_Zn_bind	RQC	HRDC	HTH_40	N/A
Q9BQA1	Wdr77	Methylosome protein 50	protein binding|ligand-dependent nuclear receptor transcription coactivator activity|	nucleus|nucleoplasm|cytoplasm|Golgi apparatus|cytosol|methylosome|	1	0	0	0	0	0	0	0	0	0	Known	Non-polyA	N/A	2.75133	Moderate	WD40	N/A	N/A	N/A	N/A	N/A	N/A	N/A
P14618	Pkm	Pyruvate kinase PKM	magnesium ion binding|pyruvate kinase activity|protein binding|ATP binding|MHC class II protein complex binding|potassium ion binding|ADP binding|poly(A) RNA binding|	nucleus|cytoplasm|mitochondrion|cytosol|plasma membrane|cilium|extracellular matrix|vesicle|myelin sheath|extracellular exosome|extracellular vesicle|	1	1	1	0	0	0	0	0	0	1	Known	polyA	polyA	2.752	Moderate	Pk	Pk_C	N/A	N/A	N/A	N/A	N/A	N/A
Q6P1R4	Dus1l	tRNA-dihydrouridine(16/17) synthase [NAD(P)(+)]-like	tRNA dihydrouridine synthase activity|flavin adenine dinucleotide binding|	N/A	0	0	0	0	0	0	0	0	0	0	Orphan	Non-polyA	N/A	2.75333	Moderate	Dus	N/A	N/A	N/A	N/A	N/A	N/A	N/A
P63244	Gnb2l1	Receptor of activated protein C kinase 1	protein kinase C binding|receptor binding|protein binding|ion channel inhibitor activity|cysteine-type endopeptidase activator activity involved in apoptotic process|enzyme binding|protein phosphatase binding|protein tyrosine kinase inhibitor activity|receptor tyrosine kinase binding|protein complex scaffold|signaling adaptor activity|SH2 domain binding|protein homodimerization activity|poly(A) R…	phagocytic cup|nucleus|cytoplasm|mitochondrion|cytosol|cytoskeleton|small ribosomal subunit|dendrite|midbody|neuronal cell body|perikaryon|perinuclear region of cytoplasm|extracellular exosome|IRE1-RACK1-PP2A complex|	1	1	1	1	1	0	0	1	1	1	Known	polyA	polyA	2.75533	Moderate	WD40*7	N/A	N/A	N/A	N/A	N/A	N/A	N/A
P29590-2	Pml	Isoform PML-5 of Protein PML	DNA binding|transcription coactivator activity|protein binding|zinc ion binding|ubiquitin protein ligase binding|SUMO binding|protein homodimerization activity|SMAD binding|protein heterodimerization activity|cobalt ion binding|	nucleus|nucleoplasm|nucleolus|cytoplasm|cytosol|nuclear matrix|PML body|early endosome membrane|nuclear membrane|extrinsic component of endoplasmic reticulum membrane|PML body|	1	0	0	0	0	0	0	0	0	0	Known	Non-polyA	N/A	2.76267	Moderate	zf-B_box	DUF3583	N/A	N/A	N/A	N/A	N/A	N/A
P06576	Atp5b	ATP synthase subunit beta, mitochondrial	transporter activity|protein binding|ATP binding|transmembrane transporter activity|MHC class I protein binding|proton-transporting ATP synthase activity, rotational mechanism|proton-transporting ATPase activity, rotational mechanism|ATPase activity|	nucleus|mitochondrion|mitochondrial proton-transporting ATP synthase complex|mitochondrial proton-transporting ATP synthase, catalytic core|mitochondrial matrix|plasma membrane|cell surface|membrane|mitochondrial membrane|mitochondrial nucleoid|myelin sheath|extracellular exosome|	0	0	1	0	0	0	0	0	0	1	Known	polyA	polyA	2.764	Moderate	ATP-synt_ab_N	ATP-synt_ab	N/A	N/A	N/A	N/A	N/A	N/A
Q9Y230	Ruvbl2	RuvB-like 2	RNA polymerase II core promoter sequence-specific DNA binding|RNA polymerase II distal enhancer sequence-specific DNA binding|DNA helicase activity|damaged DNA binding|ATP-dependent DNA helicase activity|protein binding|ATP binding|chromatin DNA binding|identical protein binding|ATP-dependent 5'-3' DNA helicase activity|unfolded protein binding|ATPase activity|	Swr1 complex|intracellular|nucleus|nucleoplasm|nuclear euchromatin|cytoplasm|membrane|nuclear matrix|ribonucleoprotein complex|Ino80 complex|NuA4 histone acetyltransferase complex|extracellular exosome|MLL1 complex|	1	0	1	0	0	0	0	0	0	0	Known	Non-polyA	mRNA (Gerstberger, S., et al. Nat. Rev. Genetics. 2014. )	2.76433	Moderate	TIP49	TIP49_C	N/A	N/A	N/A	N/A	N/A	N/A
Q9ULU4-12	Zmynd8	Isoform 12 of Protein kinase C-binding protein 1	RNA polymerase II transcription corepressor activity|protein binding|zinc ion binding|repressing transcription factor binding|	nucleus|	1	0	1	0	0	0	0	0	0	0	Known	Non-polyA	N/A	2.766	Moderate	Bromodomain	PWWP	DUF3544	N/A	N/A	N/A	N/A	N/A
Q13356	Ppil2	Peptidyl-prolyl cis-trans isomerase-like 2	peptidyl-prolyl cis-trans isomerase activity|protein binding|ligase activity|ubiquitin-ubiquitin ligase activity|ubiquitin protein ligase activity|	nucleus|nucleoplasm|cytoplasm|Golgi lumen|plasma membrane|	0	0	0	0	0	0	0	0	0	0	Orphan	Non-polyA	N/A	2.76833	Moderate	Pro_isomerase	N/A	N/A	N/A	N/A	N/A	N/A	N/A
Q5VTR2	Rnf20	E3 ubiquitin-protein ligase BRE1A	p53 binding|chromatin binding|transcription coactivator activity|mRNA 3'-UTR binding|ubiquitin-protein transferase activity|protein binding|zinc ion binding|ligase activity|ubiquitin protein ligase binding|histone binding|ubiquitin-protein transferase activity|	ubiquitin ligase complex|nucleus|nucleoplasm|nucleolus|HULC complex|	1	0	0	0	0	1	0	0	0	0	Known	Non-polyA	mRNA (Pirngruber J., et al. EMBO Rep. 2009.)	2.77033	Moderate	zf-C3HC4_3	N/A	N/A	N/A	N/A	N/A	N/A	N/A
Q15555	Mapre2	Microtubule-associated protein RP/EB family member 2	protein binding|microtubule binding|	cytoplasm|microtubule cytoskeleton|microtubule plus-end|	0	0	0	0	0	0	0	0	0	0	Orphan	Non-polyA	N/A	2.77067	Moderate	CH	Eb1	N/A	N/A	N/A	N/A	N/A	N/A
P07195	Ldhb	L-lactate dehydrogenase B chain	L-lactate dehydrogenase activity|protein binding|kinase binding|identical protein binding|NAD binding|	cytoplasm|mitochondrion|cytosol|membrane|myelin sheath|membrane raft|extracellular exosome|	1	1	1	0	1	0	0	1	0	0	Known	polyA	polyA	2.771	Moderate	Ldh_1_N	Ldh_1_C	N/A	N/A	N/A	N/A	N/A	N/A
Q969X6	Cirh1a	U3 small nucleolar RNA-associated protein 4 homolog	protein binding|poly(A) RNA binding|	nucleolus|t-UTP complex|	0	1	0	0	0	0	0	0	1	0	Known	polyA	polyA	2.774	Moderate	WD40	N/A	N/A	N/A	N/A	N/A	N/A	N/A
P34932	Hspa4	Heat shock 70 kDa protein 4	protein binding|ATP binding|	cytosol|extracellular exosome|	1	0	1	0	0	0	0	0	0	0	Known	Non-polyA	N/A	2.778	Moderate	Hsp70*2	N/A	N/A	N/A	N/A	N/A	N/A	N/A
Q12888	Tp53bp1	TP53-binding protein 1	RNA polymerase II activating transcription factor binding|RNA polymerase II transcription cofactor activity|p53 binding|damaged DNA binding|protein binding|methylated histone binding|telomeric DNA binding|	condensed chromosome kinetochore|nuclear chromosome, telomeric region|nucleus|nucleoplasm|replication fork|cytoplasm|chromosome, telomeric region|	1	0	1	0	0	0	0	0	0	0	Known	Non-polyA	N/A	2.781	Moderate	53-BP1_Tudor	BRCT 3	N/A	N/A	N/A	N/A	N/A	N/A
Q8NEZ5	Fbxo22	F-box only protein 22	ubiquitin-protein transferase activity|	nucleus|Z disc|	0	0	0	0	0	0	0	0	0	0	Orphan	Non-polyA	N/A	2.78333	Moderate	F-box	FIST_C	N/A	N/A	N/A	N/A	N/A	N/A
Q6W2J9	Bcor	BCL-6 corepressor	transcription corepressor activity|protein binding|transcription factor binding|heat shock protein binding|histone deacetylase binding|transcription regulatory region DNA binding|ubiquitin-protein transferase activity|	nucleus|PcG protein complex|	0	0	0	0	0	0	0	0	0	0	Orphan	Non-polyA	N/A	2.784	Moderate	BCOR	Ank_2	PUFD	N/A	N/A	N/A	N/A	N/A
P49759	Clk1	Dual specificity protein kinase CLK1	protein serine/threonine kinase activity|protein serine/threonine/tyrosine kinase activity|non-membrane spanning protein tyrosine kinase activity|protein binding|ATP binding|	nucleus|cytoplasm|	0	0	0	0	0	0	0	0	0	0	Orphan	Non-polyA	N/A	2.78667	Moderate	Pkinase	N/A	N/A	N/A	N/A	N/A	N/A	N/A
P12268	Impdh2	Inosine-5'-monophosphate dehydrogenase 2	nucleotide binding|DNA binding|RNA binding|IMP dehydrogenase activity|protein binding|metal ion binding|	nucleus|cytoplasm|peroxisomal membrane|cytosol|membrane|extracellular exosome|	1	0	0	0	0	1	0	0	0	0	Known	Non-polyA	N/A	2.788	Moderate	IMPDH	CBS	CBS	N/A	N/A	N/A	N/A	N/A
O43143	Dhx15	Pre-mRNA-splicing factor ATP-dependent RNA helicase DHX15	RNA helicase activity|double-stranded RNA binding|ATP-dependent RNA helicase activity|protein binding|ATP binding|poly(A) RNA binding|	nucleus|nucleoplasm|U12-type spliceosomal complex|nucleolus|cytoplasm|U2-type post-mRNA release spliceosomal complex|	1	1	1	1	1	1	1	1	1	1	Known	polyA	polyA	2.78933	Moderate	DEAD	Helicase_C	HA2	OB_NTP_bind	N/A	N/A	N/A	N/A
O75182	Sin3b	Paired amphipathic helix protein Sin3b	RNA polymerase II transcription corepressor activity|chromatin binding|protein binding|histone deacetylase activity|	chromatin|X chromosome|Y chromosome|XY body|nucleus|nucleoplasm|cytoplasm|Sin3 complex|autosome|	0	0	0	0	0	0	0	0	0	0	Orphan	Non-polyA	N/A	2.79133	Moderate	PAH	PAH	PAH	Sin3_corepress	Sin3_corepress	Sin3a_C	N/A	N/A
O60281	Znf292	Zinc finger protein 292	RNA polymerase II core promoter proximal region sequence-specific DNA binding transcription factor activity involved in positive regulation of transcription|DNA binding|metal ion binding|	nucleus|	0	0	0	0	0	0	0	0	0	0	Orphan	Non-polyA	N/A	2.79367	Moderate	zf-C2H2	N/A	N/A	N/A	N/A	N/A	N/A	N/A
Q14980-2	Numa1	Isoform 2 of Nuclear mitotic apparatus protein 1	structural molecule activity|protein binding|microtubule binding|	Golgi membrane|spindle pole|nucleus|nucleoplasm|chromosome|cytoplasm|spindle|cytosol|spindle microtubule|nuclear matrix|dendrite|neuronal cell body|apical part of cell|extracellular exosome|	0	0	1	0	1	0	0	0	0	1	Known	polyA	polyA	2.79467	Moderate	N/A	N/A	N/A	N/A	N/A	N/A	N/A	N/A
Q9BQ67	Grwd1	Glutamate-rich WD repeat-containing protein 1	poly(A) RNA binding|	nucleus|nucleolus|cytoplasm|	0	1	1	1	0	0	0	1	1	0	Known	polyA	polyA	2.79633	Moderate	WD40*3	CAF1C_H4-bd	N/A	N/A	N/A	N/A	N/A	N/A
A0AVT1	Uba6	Ubiquitin-like modifier-activating enzyme 6	ubiquitin activating enzyme activity|protein binding|ATP binding|FAT10 activating enzyme activity|	cytoplasm|cytosol|	1	0	0	0	0	0	0	0	0	0	Known	Non-polyA	N/A	2.79933	Moderate	ThiF	E1_FCCH	E1_4HB	ThiF	UBA_e1_thiolCys	E1_UFD	N/A	N/A
P49454	Cenpf	Centromere protein F	chromatin binding|protein binding|protein C-terminus binding|transcription factor binding|protein homodimerization activity|dynein binding|	chromosome, centromeric region|kinetochore|spindle pole|condensed chromosome outer kinetochore|nucleus|nuclear envelope|nucleoplasm|cytoplasm|spindle|cytosol|nuclear matrix|midbody|pronucleus|perinuclear region of cytoplasm|chromatin|	0	0	1	0	0	0	0	0	0	0	Known	Non-polyA	N/A	2.80067	Moderate	CENP-F_N	CENP-F_leu_zip*3	CENP-F_C_Rb_bdg	N/A	N/A	N/A	N/A	N/A
O75131	Cpne3	Copine-3	protein serine/threonine kinase activity|transporter activity|calcium-dependent phospholipid binding|poly(A) RNA binding|	nucleus|cytoplasm|cytosol|plasma membrane|extracellular exosome|	1	0	0	0	0	0	0	0	1	0	Known	polyA	polyA	2.802	Moderate	C2*2	Copine	N/A	N/A	N/A	N/A	N/A	N/A
Q7Z6Z7	Huwe1	E3 ubiquitin-protein ligase HUWE1	DNA binding|ubiquitin-protein transferase activity|protein binding|ligase activity|poly(A) RNA binding|	nucleus|nucleoplasm|cytoplasm|membrane|extracellular exosome|	1	0	1	0	0	0	0	0	1	0	Known	polyA	polyA	2.803	Moderate	DUF908	DUF913	UBA	WWE	UBM*3	HECT	N/A	N/A
Q9H5V9	CXorf56	UPF0428 protein CXorf56	N/A	N/A	0	0	0	0	0	0	0	0	0	0	Orphan	Non-polyA	N/A	2.80767	Moderate	N/A	N/A	N/A	N/A	N/A	N/A	N/A	N/A
Q00535	Cdk5	Cyclin-dependent-like kinase 5	p53 binding|protein kinase activity|protein serine/threonine kinase activity|cyclin-dependent protein serine/threonine kinase activity|ErbB-2 class receptor binding|protein binding|ATP binding|cytoskeletal protein binding|kinase activity|protein kinase binding|acetylcholine receptor activator activity|ErbB-3 class receptor binding|ephrin receptor binding|tau-protein kinase activity|	nucleus|cytoplasm|cytosol|cytoskeleton|postsynaptic density|membrane|cyclin-dependent protein kinase 5 holoenzyme complex|lamellipodium|cell junction|filopodium|axon|dendrite|growth cone|neuromuscular junction|neuronal cell body|perikaryon|postsynaptic membrane|	1	0	0	0	0	0	0	0	0	0	Known	Non-polyA	N/A	2.808	Moderate	Pkinase	N/A	N/A	N/A	N/A	N/A	N/A	N/A
P25490	Yy1	Transcriptional repressor protein YY1	four-way junction DNA binding|RNA polymerase II core promoter proximal region sequence-specific DNA binding transcription factor activity involved in negative regulation of transcription|enhancer sequence-specific DNA binding|DNA binding|sequence-specific DNA binding transcription factor activity|transcription coactivator activity|transcription corepressor activity|RNA binding|protein binding|zin…	nucleus|transcription factor complex|cytoplasm|nuclear matrix|Ino80 complex|PcG protein complex|	0	0	0	0	0	1	0	0	0	0	Known	Non-polyA	ssRNA (Wai D.C.C., et al. Nucleic. Acids. Res. 2016.)	2.813	Moderate	zf-C2H2*3	N/A	N/A	N/A	N/A	N/A	N/A	N/A
P11142	Hspa8	Heat shock cognate 71 kDa protein	G-protein coupled receptor binding|protein binding|ATP binding|ATPase activity|enzyme binding|MHC class II protein complex binding|heat shock protein binding|ubiquitin protein ligase binding|ATPase activity, coupled|poly(A) RNA binding|unfolded protein binding|C3HC4-type RING finger domain binding|	Prp19 complex|extracellular space|intracellular|nucleus|nucleoplasm|spliceosomal complex|nucleolus|cytosol|plasma membrane|focal adhesion|membrane|ribonucleoprotein complex|melanosome|myelin sheath|clathrin-sculpted gamma-aminobutyric acid transport vesicle membrane|extracellular exosome|blood microparticle|ubiquitin ligase complex|	1	1	1	1	0	1	0	1	1	1	Known	polyA	polyA	2.818	Moderate	HSP70	N/A	N/A	N/A	N/A	N/A	N/A	N/A
F6WH68	Rtel1-tnfrsf6b	Regulator of telomere elongation helicase 1	DNA binding|ATP-dependent DNA helicase activity|ATP binding|metal ion binding|4 iron, 4 sulfur cluster binding|	nucleus|	0	0	0	0	0	0	0	0	0	0	Orphan	Non-polyA	N/A	2.81867	Moderate	DEAD_2	Helicase C_2	N/A	N/A	N/A	N/A	N/A	N/A
P61221	Abce1	ATP-binding cassette sub-family E member 1	protein binding|ATP binding|ribonuclease inhibitor activity|ATPase activity|iron-sulfur cluster binding|	cytoplasm|mitochondrion|mitochondrial matrix|membrane|	1	0	1	0	0	0	0	1	0	0	Known	polyA	polyA	2.82	Moderate	RLI	Fer4	ABC_tran	N/A	N/A	N/A	N/A	N/A
P42356	Pi4ka	Phosphatidylinositol 4-kinase alpha	1-phosphatidylinositol 4-kinase activity|protein binding|ATP binding|	cytoplasm|cytosol|plasma membrane|focal adhesion|membrane|Golgi-associated vesicle membrane|extracellular exosome|	1	0	0	0	0	0	0	0	0	0	Known	Non-polyA	N/A	2.82833	Moderate	PI3Ka	PI3_PI4_kinase	PI3_PI4_kinase	N/A	N/A	N/A	N/A	N/A
O43813	Lancl1	LanC-like protein 1	catalytic activity|G-protein coupled receptor activity|protein binding|zinc ion binding|SH3 domain binding|glutathione binding|low-density lipoprotein particle receptor binding|	nucleus|cytoplasm|extracellular exosome|integral component of plasma membrane|	0	0	0	0	0	0	0	0	0	0	Orphan	Non-polyA	N/A	2.83033	Moderate	LANC_like	N/A	N/A	N/A	N/A	N/A	N/A	N/A
O75417	Polq	DNA polymerase theta	chromatin binding|damaged DNA binding|DNA-directed DNA polymerase activity|protein binding|ATP binding|single-stranded DNA-dependent ATPase activity|5'-deoxyribose-5-phosphate lyase activity|	nucleoplasm|chromosome|	0	0	0	0	0	0	0	0	0	0	Orphan	Non-polyA	N/A	2.832	Moderate	DEAD	Helicase C	DNA_pol_A	N/A	N/A	N/A	N/A	N/A
Q10570	Cpsf1	Cleavage and polyadenylation specificity factor subunit 1	protein binding|enzyme binding|mRNA 3'-UTR AU-rich region binding|	nucleoplasm|mRNA cleavage and polyadenylation specificity factor complex|	1	0	1	0	0	1	0	0	0	0	Known	Non-polyA	pre-mRNA (Kaufmann I., et al. EMBO J. 2004.)	2.83567	Moderate	MMS1_N	CPSF_A	N/A	N/A	N/A	N/A	N/A	N/A
O14802	Polr3a	DNA-directed RNA polymerase III subunit RPC1	DNA binding|chromatin binding|DNA-directed RNA polymerase activity|zinc ion binding|ribonucleoside binding|RNA polymerase III activity|	nucleoplasm|DNA-directed RNA polymerase III complex|cytosol|membrane|	0	0	0	0	0	0	0	0	0	1	Known	polyA	polyA	2.83567	Moderate	RNA_pol_Rpb1_1	RNA_pol_Rpb1_2	RNA_pol_Rpb1_3	RNA_pol_Rpb1_4	RNA_pol_Rpb1_5	N/A	N/A	N/A
Q2TBE0	Cwf19l2	CWF19-like protein 2	catalytic activity|	N/A	0	0	1	0	0	0	0	0	0	0	Known	Non-polyA	mRNA (Zhang X., et al. Cell Res. 2019.)	2.836	Moderate	CwfJ_C_1	CwfJ_C_2	N/A	N/A	N/A	N/A	N/A	N/A
E9PKG1	Prmt1	Protein arginine N-methyltransferase 1	protein-arginine omega-N asymmetric methyltransferase activity|	cytosol|	1	0	1	1	1	0	0	0	0	0	Known	polyA	polyA	2.83833	Moderate	Methyltransf_25	N/A	N/A	N/A	N/A	N/A	N/A	N/A
P35453	Hoxd13	Homeobox protein Hox-D13	RNA polymerase II core promoter proximal region sequence-specific DNA binding|RNA polymerase II core promoter proximal region sequence-specific DNA binding transcription factor activity involved in positive regulation of transcription|DNA binding|chromatin binding|	nucleus|	0	0	0	0	0	0	0	0	0	0	Orphan	Non-polyA	N/A	2.83867	Moderate	HoxA13_N	Homeodomain	N/A	N/A	N/A	N/A	N/A	N/A
P09960-3	Lta4h	Isoform 3 of Leukotriene A-4 hydrolase	aminopeptidase activity|epoxide hydrolase activity|leukotriene-A4 hydrolase activity|peptidase activity|zinc ion binding|peptide binding|poly(A) RNA binding|metalloaminopeptidase activity|	nucleoplasm|cytoplasm|cytosol|extracellular exosome|	1	0	1	0	0	0	0	0	1	0	Known	polyA	polyA	2.83967	Moderate	Peptidase_M1_N	Peptidase_M1	Leuk-A4-hydro_C	N/A	N/A	N/A	N/A	N/A
P11766	Adh5	Alcohol dehydrogenase class-3	alcohol dehydrogenase (NAD) activity|fatty acid binding|zinc ion binding|electron carrier activity|formaldehyde dehydrogenase activity|protein homodimerization activity|S-(hydroxymethyl)glutathione dehydrogenase activity|	mitochondrion|extracellular exosome|	1	0	0	0	0	0	0	0	0	0	Known	Non-polyA	N/A	2.84033	Moderate	ADH_N	ADH_zinc_N	N/A	N/A	N/A	N/A	N/A	N/A
Q92797	Sympk	Symplekin	protein binding|	nucleoplasm|cytoplasm|cytoskeleton|plasma membrane|bicellular tight junction|	1	0	0	0	0	0	0	0	0	0	Known	Non-polyA	mRNA (Gerstberger, S., et al. Nat. Rev. Genetics. 2014. )	2.84633	Moderate	DUF3453	Symplekin_C	N/A	N/A	N/A	N/A	N/A	N/A
Q13347	Eif3i	Eukaryotic translation initiation factor 3 subunit I	translation initiation factor activity|protein binding|translation initiation factor activity|	cytosol|eukaryotic translation initiation factor 3 complex|eukaryotic 43S preinitiation complex|eukaryotic 48S preinitiation complex|extracellular exosome|eukaryotic translation initiation factor 3 complex, eIF3m|	1	0	0	0	0	1	0	1	0	0	Known	polyA	polyA	2.84767	Moderate	WD40	WD40	WD40	N/A	N/A	N/A	N/A	N/A
Q9Y314	Nosip	Nitric oxide synthase-interacting protein	protein binding|poly(A) RNA binding|	Golgi membrane|nucleus|nucleoplasm|cytoplasm|cytosol|	1	0	0	0	0	0	0	0	1	0	Known	polyA	polyA	2.85033	Moderate	zf-NOSIP	N/A	N/A	N/A	N/A	N/A	N/A	N/A
M0R2Z9	Sugp2	SURP and G-patch domain-containing protein 2	RNA binding|	nucleoplasm|	0	0	0	1	0	1	1	0	1	1	Known	polyA	polyA	2.85667	Moderate	Surp	G-PATCH	N/A	N/A	N/A	N/A	N/A	N/A
D6RBW1	Eif4e	Eukaryotic translation initiation factor 4E	translation initiation factor activity|enzyme binding|eukaryotic initiation factor 4G binding|repressing transcription factor binding|	cytoplasm|perinuclear region of cytoplasm|	0	0	0	1	0	1	0	1	0	1	Known	polyA	polyA	2.858	Moderate	IF4E	N/A	N/A	N/A	N/A	N/A	N/A	N/A
O60508	Cdc40	Pre-mRNA-processing factor 17	protein binding|poly(A) RNA binding|	nucleoplasm|spliceosomal complex|catalytic step 2 spliceosome|	0	0	1	0	0	0	0	0	1	0	Known	polyA	polyA	2.859	Moderate	WD40	WD40	WD40	WD40	WD40	N/A	N/A	N/A
Q09161	Ncbp1	Nuclear cap-binding protein subunit 1	RNA cap binding|RNA binding|protein binding|poly(A) RNA binding|	nucleus|nucleoplasm|cytoplasm|mitochondrion|cytosol|mRNA cap binding complex|nuclear cap binding complex|ribonucleoprotein complex|	1	0	1	1	0	1	0	0	0	0	Known	polyA	polyA	2.85933	Moderate	MIF4G	MIF4G_like	MIF4G_like_2	N/A	N/A	N/A	N/A	N/A
P49368	Cct3	T-complex protein 1 subunit gamma	protein binding|ATP binding|poly(A) RNA binding|unfolded protein binding|	zona pellucida receptor complex|cytoplasm|cytosol|chaperonin-containing T-complex|cytoskeleton|microtubule|plasma membrane|myelin sheath|cell body|extracellular exosome|	1	0	1	1	1	0	0	0	0	0	Known	polyA	polyA	2.86	Moderate	Cpn60_TCP1	N/A	N/A	N/A	N/A	N/A	N/A	N/A
Q6UXN9	Wdr82	WD repeat-containing protein 82	chromatin binding|protein binding|histone methyltransferase activity (H3-K4 specific)|	chromatin|histone methyltransferase complex|Set1C/COMPASS complex|PTW/PP1 phosphatase complex|	0	0	0	0	0	0	0	0	0	0	Orphan	Non-polyA	N/A	2.861	Moderate	WD40*3	N/A	N/A	N/A	N/A	N/A	N/A	N/A
P48729	Csnk1a1	Casein kinase I isoform alpha	protein kinase activity|protein serine/threonine kinase activity|protein binding|ATP binding|	condensed chromosome kinetochore|cytoplasm|centrosome|cytosol|membrane|nuclear speck|primary cilium|mRNA cleavage and polyadenylation specificity factor complex|	0	0	1	0	0	0	0	0	0	0	Known	Non-polyA	N/A	2.862	Moderate	Pkinase	N/A	N/A	N/A	N/A	N/A	N/A	N/A
A0A0D9SFM0	Shprh	E3 ubiquitin-protein ligase SHPRH	DNA binding|helicase activity|ATP binding|zinc ion binding|	nucleosome|nucleus|	0	0	0	0	0	0	0	0	0	0	Orphan	Non-polyA	N/A	2.862	Moderate	SNF2_N	Linker_histone	Helicase C	N/A	N/A	N/A	N/A	N/A
P02545	Lmna	Prelamin-A/C	structural molecule activity|protein binding|	nucleus|nuclear envelope|lamin filament|nuclear lamina|nucleoplasm|cytoplasm|cytosol|intermediate filament|nuclear matrix|nuclear speck|nuclear membrane|perinuclear region of cytoplasm|	1	0	1	0	1	0	0	1	0	0	Known	polyA	polyA	2.86567	Moderate	Filament	LTD	N/A	N/A	N/A	N/A	N/A	N/A
Q92974	Arhgef2	Rho guanine nucleotide exchange factor 2	Rho guanyl-nucleotide exchange factor activity|protein binding|microtubule binding|transcription factor binding|zinc ion binding|Rho GTPase binding|Rac guanyl-nucleotide exchange factor activity|Rac GTPase binding|	cytoplasm|Golgi apparatus|spindle|cytosol|cytoskeleton|microtubule|bicellular tight junction|focal adhesion|cytoplasmic membrane-bounded vesicle|vesicle|ruffle membrane|neuronal cell body|dendritic shaft|protein complex|neuronal postsynaptic density|	1	0	0	0	0	0	0	1	0	0	Known	polyA	polyA	2.86667	Moderate	RhoGEF	PH_16	N/A	N/A	N/A	N/A	N/A	N/A
Q9UIF9	Baz2a	Bromodomain adjacent to zinc finger domain protein 2A	DNA binding|RNA binding|protein binding|zinc ion binding|ligand-dependent nuclear receptor binding|lysine-acetylated histone binding|	chromatin silencing complex|nucleolus|rDNA heterochromatin|	1	0	0	0	0	1	0	0	0	0	Known	Non-polyA	ncRNA (Gerstberger, S., et al. Nat. Rev. Genetics. 2013. )	2.87033	Moderate	MBD	DDT	WHIM1	WSD	WSD	PHD	Bromodomain	N/A
Q8N163	Ccar2	Cell cycle and apoptosis regulator protein 2	RNA polymerase II core binding|enzyme inhibitor activity|protein binding|enzyme binding|poly(A) RNA binding|	nuclear chromatin|nucleus|nucleoplasm|cytoplasm|mitochondrial matrix|DBIRD complex|spliceosomal complex|	1	1	1	0	0	0	1	0	0	0	Known	polyA	polyA	2.87133	Moderate	S1-like	DBC1	N/A	N/A	N/A	N/A	N/A	N/A
G8JLH9	Stat3	Signal transducer and activator of transcription	DNA binding|sequence-specific DNA binding transcription factor activity|signal transducer activity|	nucleoplasm|cytoplasm|	0	0	0	0	0	0	0	0	0	0	Orphan	Non-polyA	N/A	2.88133	Moderate	STAT_alpha	STAT_bind	SH2	N/A	N/A	N/A	N/A	N/A
O15347	Hmgb3	High mobility group protein B3	four-way junction DNA binding|chromatin binding|double-stranded DNA binding|protein binding|DNA binding, bending|poly(A) RNA binding|	nucleus|chromosome|	1	0	0	1	0	1	0	0	0	0	Known	polyA	polyA	2.88167	Moderate	HMG_box_2	HMG_box	N/A	N/A	N/A	N/A	N/A	N/A
P49915	Gmps	GMP synthase [glutamine-hydrolyzing]	GMP synthase activity|GMP synthase (glutamine-hydrolyzing) activity|ATP binding|pyrophosphatase activity|	cytoplasm|cytosol|	1	0	1	0	0	0	0	0	0	0	Known	Non-polyA	N/A	2.88167	Moderate	GATase	NAD_synthase	GMP_synt_C	N/A	N/A	N/A	N/A	N/A
P27694	Rpa1	Replication protein A 70 kDa DNA-binding subunit	chromatin binding|damaged DNA binding|single-stranded DNA binding|protein binding|metal ion binding|	lateral element|male germ cell nucleus|nucleus|nucleoplasm|DNA replication factor A complex|PML body|PML body|	1	1	1	0	0	0	0	0	0	0	Known	polyA	polyA	2.882	Moderate	Rep-A_N	tRNA_anti-codon	REPA_OB_2	Rep_fac-A_C	N/A	N/A	N/A	N/A
Q96ST3	Sin3a	Paired amphipathic helix protein Sin3a	transcription regulatory region sequence-specific DNA binding|RNA polymerase II activating transcription factor binding|RNA polymerase II repressing transcription factor binding|RNA polymerase II transcription corepressor activity|chromatin binding|sequence-specific DNA binding transcription factor activity|protein binding|protein deacetylase activity|histone deacetylase activity|	kinetochore|chromatin|nucleus|nucleoplasm|transcription factor complex|nucleolus|cytoplasm|Sin3 complex|transcriptional repressor complex|intercellular bridge|	1	0	0	0	0	1	0	0	0	0	Known	Non-polyA	N/A	2.88333	Moderate	PAH*3	Sin3_corepress	Sin3a_C	N/A	N/A	N/A	N/A	N/A
Q6KC79	Nipbl	Nipped-B-like protein	chromatin binding|protein binding|protein C-terminus binding|mediator complex binding|histone deacetylase binding|protein N-terminus binding|chromo shadow domain binding|	chromatin|nucleus|nucleoplasm|SMC loading complex|extracellular exosome|	1	0	0	0	0	0	0	0	0	0	Known	Non-polyA	rRNA (Kong X.,et al. BioRxiv. 2019.)	2.88333	Moderate	Cohesin_HEAT	Nipped-B_C	N/A	N/A	N/A	N/A	N/A	N/A
Q06330	Rbpj	Recombining binding protein suppressor of hairless	recombinase activity|RNA polymerase II core promoter proximal region sequence-specific DNA binding|RNA polymerase II core promoter sequence-specific DNA binding|RNA polymerase II core promoter proximal region sequence-specific DNA binding transcription factor activity involved in positive regulation of transcription|RNA polymerase II repressing transcription factor binding|DNA binding|chromatin b…	MAML1-RBP-Jkappa- ICN1 complex|nucleus|nucleoplasm|transcription factor complex|nucleolus|cytoplasm|	0	0	0	0	0	0	0	0	0	0	Orphan	Non-polyA	N/A	2.88367	Moderate	LAG1-DNAbind	BTD	N/A	N/A	N/A	N/A	N/A	N/A
Q93009	Usp7	Ubiquitin carboxyl-terminal hydrolase 7	p53 binding|cysteine-type endopeptidase activity|ubiquitin-specific protease activity|protein binding|protein C-terminus binding|transcription factor binding|ubiquitin protein ligase binding|	nucleus|cytoplasm|cytosol|nuclear body|PML body|	1	0	1	0	1	0	0	0	0	0	Known	Non-polyA	N/A	2.88433	Moderate	MATH	UCH	USP7_ICP0_bdg	USP7_C2	N/A	N/A	N/A	N/A
Q92785	Dpf2	Zinc finger protein ubi-d4	RNA polymerase II core promoter proximal region sequence-specific DNA binding|protein binding|zinc ion binding|	nuclear chromatin|nucleoplasm|cytoplasm|centrosome|intracellular membrane-bounded organelle|BAF-type complex|	0	0	0	0	0	0	0	0	0	0	Orphan	Non-polyA	N/A	2.887	Moderate	Requiem_N	PHD	PHD	N/A	N/A	N/A	N/A	N/A
P63151	Ppp2r2a	Serine/threonine-protein phosphatase 2A 55 kDa regulatory subunit B alpha isoform	protein serine/threonine phosphatase activity|protein binding|protein phosphatase type 2A regulator activity|protein complex binding|tau protein binding|protein phosphatase 2A binding|	protein phosphatase type 2A complex|nucleoplasm|cytosol|	1	0	1	0	1	0	0	0	0	0	Known	Non-polyA	N/A	2.88933	Moderate	N/A	N/A	N/A	N/A	N/A	N/A	N/A	N/A
O75533	Sf3b1	Splicing factor 3B subunit 1	chromatin binding|protein binding|poly(A) RNA binding|	chromatin|nucleus|nucleoplasm|spliceosomal complex|U12-type spliceosomal complex|nuclear matrix|nuclear speck|small nuclear ribonucleoprotein complex|catalytic step 2 spliceosome|	1	1	1	1	1	1	1	1	1	1	Known	polyA	polyA	2.891	Moderate	SF3b1	N/A	N/A	N/A	N/A	N/A	N/A	N/A
Q8NG31	Casc5	Kinetochore scaffold 1	protein binding|	condensed chromosome kinetochore|acrosomal vesicle|nucleus|nucleoplasm|cytoplasm|cytosol|extracellular exosome|	0	0	0	0	0	0	0	0	0	0	Orphan	Non-polyA	N/A	2.893	Moderate	MELT*12	Knl1_RWD_C	N/A	N/A	N/A	N/A	N/A	N/A
O95785-3	Wiz	Isoform 3 of Protein Wiz	protein binding|metal ion binding|SET domain binding|	nucleus|extracellular exosome|	1	0	0	0	0	0	0	0	0	0	Known	Non-polyA	N/A	2.895	Moderate	N/A	N/A	N/A	N/A	N/A	N/A	N/A	N/A
M0R1A7	Rpl18a	60S ribosomal protein L18a	structural constituent of ribosome|	ribosome|	1	1	1	1	1	0	0	1	1	1	Known	polyA	polyA	2.89533	Moderate	Ribosomal_L18ae	N/A	N/A	N/A	N/A	N/A	N/A	N/A
P52209	Pgd	6-phosphogluconate dehydrogenase, decarboxylating	phosphogluconate dehydrogenase (decarboxylating) activity|NADP binding|	nucleus|cytosol|extracellular exosome|	1	0	0	0	1	0	0	0	0	0	Known	Non-polyA	N/A	2.89833	Moderate	NAD_binding_2	6PGD	N/A	N/A	N/A	N/A	N/A	N/A
P53985	Slc16a1	Monocarboxylate transporter 1	monocarboxylic acid transmembrane transporter activity|lactate transmembrane transporter activity|mevalonate transmembrane transporter activity|symporter activity|protein homodimerization activity|organic cyclic compound binding|	mitochondrion|centrosome|plasma membrane|integral component of plasma membrane|membrane|integral component of membrane|extracellular exosome|	1	0	0	0	0	0	0	0	0	0	Known	Non-polyA	N/A	2.90067	Moderate	MFS1*2	N/A	N/A	N/A	N/A	N/A	N/A	N/A
Q86VP6	Cand1	Cullin-associated NEDD8-dissociated protein 1	protein binding|TBP-class protein binding|	ubiquitin ligase complex|nucleus|nucleoplasm|cytoplasm|membrane|cullin-RING ubiquitin ligase complex|extracellular exosome|	1	0	1	0	1	0	0	0	0	0	Known	Non-polyA	N/A	2.90267	Moderate	TIP120	N/A	N/A	N/A	N/A	N/A	N/A	N/A
P35251	Rfc1	Replication factor C subunit 1	DNA binding|DNA clamp loader activity|protein binding|ATP binding|enzyme activator activity|	nucleus|nucleoplasm|DNA replication factor C complex|Golgi apparatus|cell junction|extracellular exosome|	0	0	1	0	0	0	0	0	0	0	Known	Non-polyA	N/A	2.90267	Moderate	BRCT	AAA	RFC1	N/A	N/A	N/A	N/A	N/A
Q92598	Hsph1	Heat shock protein 105 kDa	protein binding|ATP binding|alpha-tubulin binding|	extracellular region|nucleoplasm|cytoplasm|cytosol|microtubule|extracellular exosome|endocytic vesicle lumen|	1	0	1	0	1	0	0	0	0	0	Known	Non-polyA	N/A	2.90833	Moderate	HSP70	N/A	N/A	N/A	N/A	N/A	N/A	N/A
D6R9J0	Pcyox1l	Prenylcysteine oxidase-like	prenylcysteine oxidase activity|	vacuolar membrane|	0	0	0	0	0	0	0	0	0	0	Orphan	Non-polyA	N/A	2.90867	Moderate	NAD_binding_8	N/A	N/A	N/A	N/A	N/A	N/A	N/A
B5MDF5	Ran	GTP-binding nuclear protein Ran	GTPase activity|GTP binding|	intracellular|	0	0	0	1	0	1	0	0	1	1	Known	polyA	polyA	2.90967	Moderate	Roc	N/A	N/A	N/A	N/A	N/A	N/A	N/A
Q14247	Cttn	Src substrate cortactin	protein binding|profilin binding|	ruffle|podosome|cytoplasm|cytoskeleton|coated pit|focal adhesion|cell cortex|lamellipodium|cortical cytoskeleton|dendritic spine|extracellular exosome|mitotic spindle midzone|actin filament|voltage-gated potassium channel complex|growth cone|	1	0	1	0	0	0	0	1	0	0	Known	polyA	polyA	2.911	Moderate	HS1_rep*7	SH3_9	N/A	N/A	N/A	N/A	N/A	N/A
Q9UMS4	Prpf19	Pre-mRNA-processing factor 19	protein binding|ligase activity|ubiquitin-ubiquitin ligase activity|identical protein binding|ubiquitin protein ligase activity|	Prp19 complex|nucleus|nucleoplasm|cytoplasm|lipid particle|spindle|membrane|nuclear speck|site of double-strand break|U2-type catalytic step 1 spliceosome|catalytic step 2 spliceosome|DNA replication factor A complex|	1	0	1	0	1	0	0	0	0	0	Known	Non-polyA	pre-mRNA (David C.J. Gene & Development. 2011.)	2.91333	Moderate	U-box	Prp19	WD40*5	N/A	N/A	N/A	N/A	N/A
Q8IX18	Dhx40	Probable ATP-dependent RNA helicase DHX40	ATP-dependent RNA helicase activity|ATP binding|poly(A) RNA binding|	cytoplasm|	0	0	1	0	0	1	0	0	0	0	Known	Non-polyA	mRNA (Gaudet P., et al. Brief. Bioinformatics. 2011.)	2.91367	Moderate	DEAD	Helicase C	HA2	OB_NTP_bind	N/A	N/A	N/A	N/A
P49321	Nasp	Nuclear autoantigenic sperm protein	protein binding|protein complex binding|histone binding|Hsp90 protein binding|	nuclear chromatin|nucleus|nucleoplasm|cytoplasm|protein complex|	1	0	1	0	1	0	0	0	0	0	Known	Non-polyA	N/A	2.916	Moderate	SHNi-TPR	N/A	N/A	N/A	N/A	N/A	N/A	N/A
P40926	Mdh2	Malate dehydrogenase, mitochondrial	L-malate dehydrogenase activity|protein self-association|poly(A) RNA binding|malate dehydrogenase (NADP+) activity|	nucleus|nucleoplasm|mitochondrion|mitochondrial inner membrane|mitochondrial matrix|plasma membrane|myelin sheath|extracellular exosome|	0	0	1	1	1	0	0	1	1	1	Known	polyA	polyA	2.91667	Moderate	Ldh_1_N	Ldh_1_C	N/A	N/A	N/A	N/A	N/A	N/A
P06493	Cdk1	Cyclin-dependent kinase 1	protein kinase activity|protein serine/threonine kinase activity|cyclin-dependent protein serine/threonine kinase activity|protein binding|ATP binding|RNA polymerase II carboxy-terminal domain kinase activity|Hsp70 protein binding|	nucleus|nucleoplasm|cytoplasm|mitochondrion|centrosome|cytosol|spindle microtubule|membrane|midbody|extracellular exosome|mitotic spindle|	0	0	0	0	0	0	0	0	0	0	Orphan	Non-polyA	N/A	2.919	Moderate	Pkinase	N/A	N/A	N/A	N/A	N/A	N/A	N/A
P14678	Snrpb	Small nuclear ribonucleoprotein-associated proteins B and B'	protein binding|poly(A) RNA binding|histone pre-mRNA DCP binding|	nucleoplasm|spliceosomal complex|U5 snRNP|U7 snRNP|U1 snRNP|U2 snRNP|U4 snRNP|U12-type spliceosomal complex|cytoplasm|cytosol|small nuclear ribonucleoprotein complex|methylosome|SMN-Sm protein complex|U4/U6 x U5 tri-snRNP complex|extracellular exosome|U2-type prespliceosome|catalytic step 2 spliceosome|histone pre-mRNA 3'end processing complex|	0	0	1	1	0	1	0	0	0	1	Known	polyA	polyA	2.92233	Moderate	LSM	N/A	N/A	N/A	N/A	N/A	N/A	N/A
Q9Y5B9	Supt16h	FACT complex subunit SPT16	protein binding|poly(A) RNA binding|	nucleus|nucleoplasm|chromosome|	1	0	1	1	0	0	0	0	1	0	Known	polyA	polyA	2.92533	Moderate	FACT-Spt16_Nlob	Peptidase_M24	SPT16	Rtt106	N/A	N/A	N/A	N/A
Q9Y5A7	Nub1	NEDD8 ultimate buster 1	protein binding|	nucleus|nucleolus|cytoplasm|	0	0	0	0	0	0	0	0	0	0	Orphan	Non-polyA	N/A	2.92567	Moderate	Ubiquitin_5	UBA*2	N/A	N/A	N/A	N/A	N/A	N/A
Q96P70	Ipo9	Importin-9	protein binding|Ran GTPase binding|protein transporter activity|histone binding|	nucleus|cytoplasm|membrane|	1	0	1	0	0	0	0	0	0	0	Known	Non-polyA	mRNA (Gerstberger, S., et al. Nat. Rev. Genetics. 2009. )	2.92967	Moderate	IBN_N	N/A	N/A	N/A	N/A	N/A	N/A	N/A
O95239	Kif4a	Chromosome-associated kinesin KIF4A	DNA binding|microtubule motor activity|protein binding|ATP binding|microtubule binding|ATPase activity|	nucleoplasm|chromosome|cytoplasm|cytosol|kinesin complex|spindle microtubule|membrane|nuclear matrix|midbody|	1	0	0	0	0	0	0	0	0	0	Known	Non-polyA	N/A	2.93333	Moderate	Kinesin	N/A	N/A	N/A	N/A	N/A	N/A	N/A
O60934	Nbn	Nibrin	protein binding|transcription factor binding|protein N-terminus binding|damaged DNA binding|ATP-dependent DNA helicase activity|	nuclear chromosome, telomeric region|nucleus|nucleoplasm|replication fork|nucleolus|PML body|Mre11 complex|site of double-strand break|nuclear inclusion body|	0	0	0	0	0	0	0	0	0	0	Orphan	Non-polyA	N/A	2.93333	Moderate	FHA	NIBRIN_BRCT_II	Nbs1_C	N/A	N/A	N/A	N/A	N/A
Q9NR09	Birc6	Baculoviral IAP repeat-containing protein 6	ubiquitin-protein transferase activity|cysteine-type endopeptidase inhibitor activity|protein binding|ligase activity|ubiquitin conjugating enzyme activity|	spindle pole|cytoplasm|endosome|trans-Golgi network|microtubule organizing center|membrane|midbody|	1	1	1	0	0	0	0	0	0	0	Known	polyA	polyA	2.93533	Moderate	BIR	BIRC6	UQ_con	N/A	N/A	N/A	N/A	N/A
P08238	Hsp90ab1	Heat shock protein HSP 90-beta	UTP binding|CTP binding|double-stranded RNA binding|protein binding|ATP binding|GTP binding|sulfonylurea receptor binding|kinase binding|protein kinase binding|MHC class II protein complex binding|nitric-oxide synthase regulator activity|TPR domain binding|dATP binding|ion channel binding|poly(A) RNA binding|unfolded protein binding|	nucleoplasm|cytoplasm|mitochondrion|cytosol|cell surface|membrane|inclusion body|basolateral plasma membrane|apical plasma membrane|brush border membrane|melanosome|extracellular exosome|COP9 signalosome|	0	1	1	1	1	1	0	1	1	1	Known	polyA	polyA	2.93567	Moderate	HATPase_c	HSP90	N/A	N/A	N/A	N/A	N/A	N/A
P10809	Hspd1	60 kDa heat shock protein, mitochondrial	lipopolysaccharide binding|protease binding|p53 binding|DNA replication origin binding|single-stranded DNA binding|double-stranded RNA binding|protein binding|ATP binding|ATPase activity|ubiquitin protein ligase binding|protein complex binding|insulin binding|poly(A) RNA binding|protein heterodimerization activity|unfolded protein binding|chaperone binding|misfolded protein binding|	extracellular space|cytoplasm|mitochondrion|mitochondrial inner membrane|mitochondrial matrix|early endosome|rough endoplasmic reticulum|Golgi apparatus|cytosol|plasma membrane|coated pit|cell surface|membrane|mitochondrial crista|coated vesicle|secretory granule|zymogen granule|myelin sheath|protein complex|membrane raft|lipopolysaccharide receptor complex|extracellular exosome|cyclin-dependent …	1	0	1	0	0	1	0	1	1	0	Known	polyA	polyA	2.93567	Moderate	Cpn60_TCP1	N/A	N/A	N/A	N/A	N/A	N/A	N/A
Q8WY36	Bbx	HMG box transcription factor BBX	DNA binding|	nucleoplasm|cytoplasm|	0	0	0	0	0	0	0	0	0	0	Orphan	Non-polyA	N/A	2.939	Moderate	HMG_box	DUF2028	N/A	N/A	N/A	N/A	N/A	N/A
Q9ULW0	Tpx2	Targeting protein for Xklp2	protein binding|ATP binding|GTP binding|protein kinase binding|	nucleus|nucleoplasm|cytoplasm|spindle|microtubule|microtubule cytoskeleton|axon hillock|spindle pole|	1	0	0	0	0	0	0	0	0	0	Known	Non-polyA	N/A	2.93933	Moderate	Aurora-A_bind	TPX2_importin	TPX2	N/A	N/A	N/A	N/A	N/A
Q6ZRI6	C15orf39	Uncharacterized protein C15orf39	N/A	cytoplasm|	0	0	0	0	0	0	0	0	0	0	Orphan	Non-polyA	N/A	2.941	Moderate	DUF5525	N/A	N/A	N/A	N/A	N/A	N/A	N/A
O94906	Prpf6	Pre-mRNA-processing factor 6	transcription coactivator activity|RNA binding|protein binding|ribonucleoprotein complex binding|poly(A) RNA binding|androgen receptor binding|	nucleus|nucleoplasm|spliceosomal complex|U5 snRNP|membrane|nuclear speck|U4/U6 x U5 tri-snRNP complex|U4/U6 snRNP|catalytic step 2 spliceosome|	1	0	0	0	0	1	0	0	1	0	Known	polyA	polyA	2.948	Moderate	PRP1_N	TPR_8	N/A	N/A	N/A	N/A	N/A	N/A
Q9Y6X9	Morc2	MORC family CW-type zinc finger protein 2	zinc ion binding|	nucleus|nucleoplasm|cytoplasm|cytosol|	0	0	0	0	0	0	0	0	0	0	Orphan	Non-polyA	N/A	2.95	Moderate	HATPase_c_3	Morc6_S5	zf-CW	N/A	N/A	N/A	N/A	N/A
Q86UE8	Tlk2	Serine/threonine-protein kinase tousled-like 2	protein serine/threonine kinase activity|protein binding|ATP binding|	nucleus|intermediate filament|perinuclear region of cytoplasm|	0	0	0	0	0	0	0	0	0	0	Orphan	Non-polyA	N/A	2.95033	Moderate	Pkinase	N/A	N/A	N/A	N/A	N/A	N/A	N/A
P26639	Tars	Threonine--tRNA ligase, cytoplasmic	threonine-tRNA ligase activity|protein binding|ATP binding|protein homodimerization activity|	cytoplasm|cytosol|actin cytoskeleton|extracellular exosome|	1	0	1	0	1	0	0	1	0	0	Known	polyA	polyA	2.951	Moderate	TGS	tRNA_SAD	tRNA-synt_2b	HGTP_anticodon	N/A	N/A	N/A	N/A
P55060	Cse1l	Exportin-2	protein binding|importin-alpha export receptor activity|Ran GTPase binding|	nucleus|nucleoplasm|cytoplasm|membrane|extracellular exosome|	1	0	1	0	0	0	0	1	0	0	Known	polyA	polyA	2.95267	Moderate	IBN_N	CSE	CAS_CSE1	N/A	N/A	N/A	N/A	N/A
Q9Y4B4	Rad54l2	Helicase ARIP4	DNA binding|transcription cofactor activity|helicase activity|protein binding|ATP binding|ATPase activity|protein kinase binding|	nuclear speck|	0	0	0	0	0	0	0	0	0	0	Orphan	Non-polyA	N/A	2.95367	Moderate	SNF2_N	Helicase C	N/A	N/A	N/A	N/A	N/A	N/A
B4DXZ6	Fxr1	Fragile X mental retardation syndrome-related protein 1	mRNA binding|	nucleus|cytoplasm|	1	1	1	1	1	1	1	1	1	1	Known	polyA	polyA	2.95467	Moderate	Tudor_FRX1	Agenet	KH_9	KH 1*2	FXMRP1_C_core*2	FXR_C1	FXR_C3	N/A
E9PC62	Celf2	CUGBP Elav-like family member 2	nucleotide binding|RNA binding|	cytoplasm|	0	0	0	1	0	1	1	0	0	0	Known	polyA	polyA	2.95733	Moderate	RRM1*3	N/A	N/A	N/A	N/A	N/A	N/A	N/A
Q15269	Pwp2	Periodic tryptophan protein 2 homolog	snoRNA binding|poly(A) RNA binding|	nucleolus|cytoplasm|small-subunit processome|Pwp2p-containing subcomplex of 90S preribosome|	1	1	1	1	0	0	0	1	1	0	Known	polyA	polyA	2.958	Moderate	WD40	WD40	WD40	Utp12	N/A	N/A	N/A	N/A
Q96KM6	Znf512b	Zinc finger protein 512B	DNA binding|protein binding|metal ion binding|	nucleus|	0	0	0	0	0	0	0	0	0	0	Orphan	Non-polyA	N/A	2.95967	Moderate	N/A	N/A	N/A	N/A	N/A	N/A	N/A	N/A
K4DI93	Cul4b	Cullin 4B, isoform CRA_e	ubiquitin protein ligase binding|ubiquitin protein ligase activity|	nucleoplasm|cytoplasm|plasma membrane|cullin-RING ubiquitin ligase complex|	0	0	0	0	0	0	0	0	0	0	Orphan	Non-polyA	N/A	2.96	Moderate	Cullin	Cullin_Nedd8	N/A	N/A	N/A	N/A	N/A	N/A
F8VPD4	Cad	CAD protein	aspartate carbamoyltransferase activity|carbamoyl-phosphate synthase (ammonia) activity|carbamoyl-phosphate synthase (glutamine-hydrolyzing) activity|ATP binding|amino acid binding|hydrolase activity, acting on carbon-nitrogen (but not peptide) bonds, in cyclic amides|metal ion binding|	nucleus|nucleoplasm|cytoplasm|plasma membrane|	1	0	1	0	0	0	0	0	0	0	Known	Non-polyA	N/A	2.96133	Moderate	CPSase_sm_chain	GATase	CPSase_L_D2*3	CPSase_L_D3	MGS	Amidohydro_1	OTCace_N	OTCace
O94776	Mta2	Metastasis-associated protein MTA2	transcription factor binding transcription factor activity|RNA polymerase II transcription factor binding|RNA polymerase II repressing transcription factor binding|sequence-specific DNA binding transcription factor activity|histone deacetylase activity|protein binding|zinc ion binding|RNA polymerase II core promoter proximal region sequence-specific DNA binding|RNA polymerase II distal enhancer s…	histone deacetylase complex|nuclear chromatin|nucleoplasm|transcription factor complex|membrane|NuRD complex|protein complex|	1	0	0	0	0	0	0	0	0	0	Known	Non-polyA	N/A	2.96133	Moderate	BAH	ELM2	GATA	MTA_R1	N/A	N/A	N/A	N/A
Q9H2U1	Dhx36	ATP-dependent RNA helicase DHX36	core promoter binding|G-quadruplex RNA binding|double-stranded RNA binding|ATP-dependent RNA helicase activity|protein binding|ATP binding|DNA-dependent ATPase activity|histone deacetylase binding|transcription regulatory region DNA binding|poly(A) RNA binding|G-quadruplex DNA binding|	chromosome, telomeric region|nucleus|cytoplasm|cytosol|extracellular exosome|	1	1	1	1	1	1	0	0	1	1	Known	polyA	polyA	2.96167	Moderate	DEAD	Helicase_C	HA2	OB_NTP_bind	N/A	N/A	N/A	N/A
Q9Y3F4	Strap	Serine-threonine kinase receptor-associated protein	receptor binding|protein binding|poly(A) RNA binding|	nucleus|nucleoplasm|cytoplasm|cytosol|plasma membrane|SMN complex|SMN-Sm protein complex|	1	1	1	1	1	0	0	1	1	1	Known	polyA	polyA	2.96367	Moderate	WD40*4	N/A	N/A	N/A	N/A	N/A	N/A	N/A
Q92879	Celf1	CUGBP Elav-like family member 1	nucleotide binding|translation repressor activity, nucleic acid binding|RNA binding|mRNA binding|protein binding|translation initiation factor binding|BRE binding|poly(A) RNA binding|	nucleus|nucleoplasm|cytoplasm|membrane|ribonucleoprotein complex|	1	1	1	1	1	1	1	0	1	1	Known	polyA	polyA	2.96533	Moderate	RRM_1*3	N/A	N/A	N/A	N/A	N/A	N/A	N/A
O95373	Ipo7	Importin-7	transporter activity|protein binding|Ran GTPase binding|GTPase regulator activity|histone binding|	nuclear pore|nucleoplasm|cytoplasm|membrane|	1	0	1	0	1	0	0	0	0	0	Known	Non-polyA	mRNA (Gerstberger, S., et al. Nat. Rev. Genetics. 2006. )	2.966	Moderate	IBN_N	Cse1	N/A	N/A	N/A	N/A	N/A	N/A
P61619	Sec61a1	Protein transport protein Sec61 subunit alpha isoform 1	protein binding|ribosome binding|	rough endoplasmic reticulum|cytosol|membrane|integral component of endoplasmic reticulum membrane|	0	0	1	0	1	0	0	0	0	0	Known	Non-polyA	N/A	2.96667	Moderate	Plug_translocon	SecY	N/A	N/A	N/A	N/A	N/A	N/A
Q6AI08	Heatr6	HEAT repeat-containing protein 6	poly(A) RNA binding|	N/A	1	0	0	1	0	0	0	0	0	1	Known	polyA	polyA	2.96767	Moderate	DUF4042	N/A	N/A	N/A	N/A	N/A	N/A	N/A
P55786	Npepps	Puromycin-sensitive aminopeptidase	aminopeptidase activity|zinc ion binding|peptide binding|metalloaminopeptidase activity|	nucleus|cytosol|extracellular exosome|	1	0	0	0	0	0	0	0	0	0	Known	Non-polyA	N/A	2.96767	Moderate	Peptidase_M1_N	Peptidase_M1	ERAP1_C	N/A	N/A	N/A	N/A	N/A
P19338	Ncl	Nucleolin	nucleotide binding|single-stranded DNA binding|RNA binding|calcium ion binding|protein binding|protein C-terminus binding|selenocysteine insertion sequence binding|rRNA primary transcript binding|telomeric DNA binding|histone binding|identical protein binding|laminin binding|poly(A) RNA binding|ErbB-4 class receptor binding|	fibrillar center|dense fibrillar component|nucleus|nucleoplasm|nucleolus|cell cortex|cell surface|membrane|ribonucleoprotein complex|cytoplasmic ribonucleoprotein granule|extracellular exosome|	1	1	1	1	1	1	1	1	1	1	Known	polyA	polyA	2.96833	Moderate	RRM_1*4	N/A	N/A	N/A	N/A	N/A	N/A	N/A
P54136	Rars	Arginine--tRNA ligase, cytoplasmic	tRNA binding|arginine-tRNA ligase activity|protein binding|ATP binding|arginine binding|	nucleoplasm|cytoplasm|mitochondrion|cytosol|membrane|aminoacyl-tRNA synthetase multienzyme complex|extracellular exosome|	1	1	1	0	1	1	0	0	0	0	Known	polyA	polyA	2.97	Moderate	Arg_tRNA_synt_N	tRNA-synt_1d	DALR_1	N/A	N/A	N/A	N/A	N/A
Q99832	Cct7	T-complex protein 1 subunit eta	protein binding|ATP binding|identical protein binding|unfolded protein binding|	zona pellucida receptor complex|cytoplasm|mitochondrion|cytosol|chaperonin-containing T-complex|microtubule|cell body|extracellular exosome|	1	0	1	0	1	0	0	0	0	0	Known	Non-polyA	N/A	2.97167	Moderate	Cpn60_TCP1	N/A	N/A	N/A	N/A	N/A	N/A	N/A
P78346	Rpp30	Ribonuclease P protein subunit p30	ribonuclease P activity|protein binding|poly(A) RNA binding|	nucleus|nucleolar ribonuclease P complex|	0	0	1	0	0	1	0	0	1	0	Known	polyA	polyA	2.97533	Moderate	RNase_P_p30	N/A	N/A	N/A	N/A	N/A	N/A	N/A
Q9P2D1	Chd7	Chromodomain-helicase-DNA-binding protein 7	RNA polymerase II core promoter proximal region sequence-specific DNA binding|chromatin binding|helicase activity|protein binding|ATP binding|	nucleus|nucleoplasm|nucleolus|	0	0	0	0	0	0	0	0	0	0	Orphan	Non-polyA	N/A	2.97633	Moderate	Chromo*2	SNF2_N	Helicase_C	BRK*2	N/A	N/A	N/A	N/A
P61962	Dcaf7	DDB1- and CUL4-associated factor 7	protein binding|	nucleoplasm|cytoplasm|nuclear matrix|protein complex|Cul4-RING E3 ubiquitin ligase complex|	0	0	0	0	0	0	0	0	0	0	Orphan	Non-polyA	N/A	2.98067	Moderate	WD40	N/A	N/A	N/A	N/A	N/A	N/A	N/A
E9PEX6	Dld	Dihydrolipoyl dehydrogenase	dihydrolipoyl dehydrogenase activity|flavin adenine dinucleotide binding|	nucleoplasm|mitochondrion|	0	0	0	0	1	0	0	1	0	0	Known	polyA	polyA	2.98533	Moderate	Pyr_redox_2	Pyr_redox_dim	N/A	N/A	N/A	N/A	N/A	N/A
P36873	Ppp1cc	Serine/threonine-protein phosphatase PP1-gamma catalytic subunit	phosphoprotein phosphatase activity|protein serine/threonine phosphatase activity|protein binding|phosphatase activity|protein kinase binding|poly(A) RNA binding|metal ion binding|protein N-terminus binding|	condensed chromosome kinetochore|nucleus|nucleolus|cytoplasm|mitochondrion|cytosol|focal adhesion|nuclear speck|midbody|cleavage furrow|dendritic spine|protein complex|MLL5-L complex|PTW/PP1 phosphatase complex|	1	0	0	1	0	0	0	0	0	0	Known	polyA	polyA	2.99333	Moderate	Metallophos	STPPase_N	N/A	N/A	N/A	N/A	N/A	N/A
Q9UHX1	Puf60	Poly(U)-binding-splicing factor PUF60	nucleotide binding|DNA binding|protein binding|identical protein binding|poly(A) RNA binding|	nucleoplasm|mitochondrion|Golgi apparatus|ribonucleoprotein complex|cyclin-dependent protein kinase activating kinase holoenzyme complex|	1	1	1	1	1	1	1	1	1	1	Known	polyA	polyA	2.99467	Moderate	RRM_1*2	N/A	N/A	N/A	N/A	N/A	N/A	N/A
P49916	Lig3	DNA ligase 3	DNA binding|DNA ligase activity|DNA ligase (ATP) activity|protein binding|ATP binding|zinc ion binding|	synaptonemal complex|nucleus|nucleoplasm|cytoplasm|mitochondrion|DNA ligase III-XRCC1 complex|	1	0	0	0	0	0	0	0	0	0	Known	Non-polyA	N/A	2.99567	Moderate	zf-PARP	DNA_ligase_A_M	DNA_ligase_A_N	DNA_ligase_A_C	LIG3_BRCT	N/A	N/A	N/A
B1AKJ5	Nrd1	Nardilysin	metalloendopeptidase activity|metal ion binding|	mitochondrion|	1	0	0	0	0	0	0	0	0	0	Known	Non-polyA	ncRNA (Bacikova V., et al. Nucleic Acids Res. 2014.)	2.996	Moderate	Peptidase_M16	Peptidase_M16_C	Peptidase_M16_M	Peptidase_M16_C	N/A	N/A	N/A	N/A
Q9BXW9	Fancd2	Fanconi anemia group D2 protein	protein binding|DNA polymerase binding|	condensed chromosome|nucleoplasm|Golgi apparatus|intracellular membrane-bounded organelle|	0	0	1	0	0	0	0	0	0	0	Known	Non-polyA	ssRNA (Liang Z.,et al. Cell Reports. 2019.)	2.996	Moderate	FancD2	N/A	N/A	N/A	N/A	N/A	N/A	N/A
Q7L1Q6	Bzw1	Basic leucine zipper and W2 domain-containing protein 1	poly(A) RNA binding|	cytoplasm|membrane|	0	1	1	1	1	0	0	0	1	0	Known	polyA	polyA	2.997	Moderate	W2	N/A	N/A	N/A	N/A	N/A	N/A	N/A
A6NMQ1	Pola1	DNA polymerase	nucleotide binding|nucleoside binding|DNA binding|DNA-directed DNA polymerase activity|3'-5' exonuclease activity|	nucleoplasm|cytoplasm|	1	0	0	0	0	0	0	0	0	0	Known	Non-polyA	N/A	2.999	Moderate	DNA_pol_alpha_N	DNA_pol_B_exo1	DNA_pol_B	zf-DNA_Pol	N/A	N/A	N/A	N/A
Q6PIW4	Fignl1	Fidgetin-like protein 1	magnesium ion binding|protein binding|ATP binding|microtubule-severing ATPase activity|hydrolase activity|	nuclear chromosome|nucleus|cytoplasm|extracellular exosome|	0	0	0	0	0	0	0	0	0	0	Orphan	Non-polyA	N/A	2.99933	Moderate	AAA	Vps4_C	N/A	N/A	N/A	N/A	N/A	N/A
E7EVZ1	Zfhx4	Zinc finger homeobox protein 4	zinc ion binding|sequence-specific DNA binding|	nucleus|	0	0	0	0	0	0	0	0	0	0	Orphan	Non-polyA	N/A	3.00033	Moderate	zf-met	zf-C2H2	Homeodomain*4	N/A	N/A	N/A	N/A	N/A
Q9H8V3	Ect2	Protein ECT2	signal transducer activity|Rho guanyl-nucleotide exchange factor activity|GTPase activator activity|protein binding|Rho GTPase binding|protein homodimerization activity|	nucleus|cytoplasm|cytosol|cell-cell junction|bicellular tight junction|midbody|nuclear membrane|cleavage furrow|intracellular membrane-bounded organelle|mitotic spindle|centralspindlin complex|	0	0	0	0	0	0	0	0	0	0	Orphan	Non-polyA	N/A	3.002	Moderate	PTCB-BRCT	BRCT	RhoGEF	N/A	N/A	N/A	N/A	N/A
Q13200	Psmd2	26S proteasome non-ATPase regulatory subunit 2	protein binding|enzyme regulator activity|	proteasome complex|nucleoplasm|cytosol|proteasome regulatory particle|membrane|proteasome accessory complex|extracellular exosome|	1	0	1	0	0	0	0	0	0	0	Known	Non-polyA	N/A	3.00267	Moderate	RPN1_RPN2_N	PC_rep	PC_rep	RPN1_C	N/A	N/A	N/A	N/A
Q13283	G3bp1	Ras GTPase-activating protein-binding protein 1	DNA binding|mRNA binding|ATP-dependent DNA helicase activity|ATP-dependent RNA helicase activity|endonuclease activity|protein binding|ATP binding|poly(A) RNA binding|	nucleus|cytoplasm|cytosol|plasma membrane|focal adhesion|cytoplasmic stress granule|	1	1	1	1	1	1	1	1	1	1	Known	polyA	polyA	3.00333	Moderate	NTF2	RRM_1	N/A	N/A	N/A	N/A	N/A	N/A
P14868	Dars	Aspartate--tRNA ligase, cytoplasmic	aminoacylase activity|aspartate-tRNA ligase activity|protein binding|ATP binding|poly(A) RNA binding|	cytoplasm|cytosol|membrane|extracellular exosome|	1	0	1	0	0	1	0	0	1	0	Known	polyA	polyA	3.00533	Moderate	tRNA_anti-codon	tRNA-synt_2	N/A	N/A	N/A	N/A	N/A	N/A
P52952	Nkx2-5	Homeobox protein Nkx-2.5	RNA polymerase II core promoter proximal region sequence-specific DNA binding|RNA polymerase II core promoter proximal region sequence-specific DNA binding transcription factor activity involved in positive regulation of transcription|RNA polymerase II transcription cofactor activity|RNA polymerase II transcription factor binding transcription activator activity|RNA polymerase II transcription re…	nucleus|transcription factor complex|cytoplasm|RNA polymerase II transcription factor complex|	0	0	0	0	0	0	0	0	0	0	Orphan	Non-polyA	N/A	3.00567	Moderate	Homeodomain	N/A	N/A	N/A	N/A	N/A	N/A	N/A
P60866	Rps20	40S ribosomal protein S20	structural constituent of ribosome|protein binding|poly(A) RNA binding|	cytoplasm|cytosol|membrane|cytosolic small ribosomal subunit|extracellular exosome|	1	1	1	1	1	1	0	1	1	1	Known	polyA	polyA	3.00867	Moderate	Ribosomal_S10	N/A	N/A	N/A	N/A	N/A	N/A	N/A
Q8IWA0	Wdr75	WD repeat-containing protein 75	poly(A) RNA binding|	nucleoplasm|nucleolus|	1	1	1	1	0	0	1	0	1	0	Known	polyA	polyA	3.00867	Moderate	WD40*2	N/A	N/A	N/A	N/A	N/A	N/A	N/A
O96028	Whsc1	Histone-lysine N-methyltransferase NSD2	chromatin binding|protein binding|zinc ion binding|histone-lysine N-methyltransferase activity|sequence-specific DNA binding|	nucleus|nucleoplasm|chromosome|cytoplasm|	0	0	0	0	0	0	0	0	0	0	Orphan	Non-polyA	N/A	3.01333	Moderate	PWWP*2	HMG_box	AWS	SET	C5HCH	N/A	N/A	N/A
Q9NXG2	Thumpd1	THUMP domain-containing protein 1	poly(A) RNA binding|	N/A	1	0	1	0	0	1	0	0	1	0	Known	polyA	polyA	3.01433	Moderate	THUMP	N/A	N/A	N/A	N/A	N/A	N/A	N/A
O43395	Prpf3	U4/U6 small nuclear ribonucleoprotein Prp3	protein binding|identical protein binding|poly(A) RNA binding|	nucleus|nucleoplasm|spliceosomal complex|cytoplasm|Cajal body|nuclear speck|U4/U6 x U5 tri-snRNP complex|	1	1	1	1	0	0	0	0	0	0	Known	polyA	polyA	3.01533	Moderate	PWI	PRP3	DUF1115	N/A	N/A	N/A	N/A	N/A
O60942	Rngtt	mRNA-capping enzyme	mRNA guanylyltransferase activity|polynucleotide 5'-phosphatase activity|protein tyrosine phosphatase activity|GTP binding|protein tyrosine/serine/threonine phosphatase activity|RNA guanylyltransferase activity|triphosphatase activity|	nucleus|nucleoplasm|	1	0	0	0	0	0	0	0	0	0	Known	Non-polyA	mRNA (Ghosh A., et al. Mol. Cell. 2011.)	3.01567	Moderate	DSPc	mRNA_cap_enzyme	mRNA_cap_C	N/A	N/A	N/A	N/A	N/A
M0R2B7	Pold1	DNA polymerase	nucleotide binding|DNA binding|DNA-directed DNA polymerase activity|3'-5'-exodeoxyribonuclease activity|	nucleoplasm|cytoplasm|aggresome|delta DNA polymerase complex|	1	0	0	0	0	0	0	0	0	0	Known	Non-polyA	N/A	3.017	Moderate	DNA_pol_B_exo1	DNA_pol_B	DNA_pol_B	zf-C4pol	N/A	N/A	N/A	N/A
P56545	Ctbp2	C-terminal-binding protein 2	chromatin binding|transcription coactivator activity|transcription corepressor activity|protein binding|oxidoreductase activity, acting on the CH-OH group of donors, NAD or NADP as acceptor|retinoic acid receptor binding|NAD binding|	nucleus|transcriptional repressor complex|cell junction|ribbon synapse|	0	0	0	0	0	0	0	0	0	0	Orphan	Non-polyA	N/A	3.01933	Moderate	2-Hacid_dh	2-Hacid_dh_C	N/A	N/A	N/A	N/A	N/A	N/A
P05388	Rplp0	60S acidic ribosomal protein P0	RNA binding|structural constituent of ribosome|protein binding|poly(A) RNA binding|	nucleus|cytoplasm|cytosol|focal adhesion|membrane|cytosolic large ribosomal subunit|ribonucleoprotein complex|cytoplasmic ribonucleoprotein granule|extracellular exosome|	1	0	1	1	1	1	0	0	1	1	Known	polyA	polyA	3.024	Moderate	Ribosomal_L10	Ribosomal_60s	N/A	N/A	N/A	N/A	N/A	N/A
Q14202	Zmym3	Zinc finger MYM-type protein 3	DNA binding|zinc ion binding|	nucleus|	1	0	0	0	0	0	0	0	0	0	Known	Non-polyA	N/A	3.027	Moderate	zf-FCS	DUF3504	N/A	N/A	N/A	N/A	N/A	N/A
Q7LBC6	Kdm3b	Lysine-specific demethylase 3B	antioxidant activity|metal ion binding|dioxygenase activity|	nucleoplasm|	1	0	0	0	0	0	0	0	0	0	Known	Non-polyA	N/A	3.02767	Moderate	JmjC	N/A	N/A	N/A	N/A	N/A	N/A	N/A
P23921	Rrm1	Ribonucleoside-diphosphate reductase large subunit	ribonucleoside-diphosphate reductase activity, thioredoxin disulfide as acceptor|protein binding|ATP binding|	nuclear envelope|nucleoplasm|cytoplasm|cytosol|cell projection|neuronal cell body|extracellular exosome|	1	0	0	0	1	0	0	0	0	0	Known	Non-polyA	N/A	3.02933	Moderate	ATP-cone	Ribonuc_red_lgN	Ribonuc_red_lgC	N/A	N/A	N/A	N/A	N/A
Q8IWI9	Mga	MAX gene-associated protein	DNA binding|sequence-specific DNA binding transcription factor activity|protein dimerization activity|	nucleoplasm|transcription factor complex|cytoplasm|MLL1 complex|	1	0	0	0	0	0	0	0	0	0	Known	Non-polyA	N/A	3.03	Moderate	T-box	DUF4801	HLH	N/A	N/A	N/A	N/A	N/A
Q9P275	Usp36	Ubiquitin carboxyl-terminal hydrolase 36	cysteine-type endopeptidase activity|ubiquitin-specific protease activity|poly(A) RNA binding|	nucleus|nucleolus|	1	1	1	0	0	0	0	0	1	0	Known	polyA	polyA	3.031	Moderate	UCH	N/A	N/A	N/A	N/A	N/A	N/A	N/A
O43175	Phgdh	D-3-phosphoglycerate dehydrogenase	phosphoglycerate dehydrogenase activity|electron carrier activity|NAD binding|	cytosol|myelin sheath|extracellular exosome|	1	0	1	0	1	0	0	1	0	0	Known	polyA	polyA	3.03133	Moderate	2-Hacid_dh	2-Hacid_dh_C	N/A	N/A	N/A	N/A	N/A	N/A
P05141	Slc25a5	ADP/ATP translocase 2	protein binding|adenine transmembrane transporter activity|ubiquitin protein ligase binding|poly(A) RNA binding|	nucleus|mitochondrion|mitochondrial inner membrane|integral component of plasma membrane|membrane|mitochondrial nucleoid|myelin sheath|extracellular exosome|MMXD complex|	0	0	0	0	1	0	0	0	1	0	Known	polyA	polyA	3.03333	Moderate	Mito_carr*3	N/A	N/A	N/A	N/A	N/A	N/A	N/A
P62269	Rps18	40S ribosomal protein S18	structural constituent of ribosome|protein binding|rRNA binding|poly(A) RNA binding|	nucleus|cytoplasm|cytosol|ribosome|focal adhesion|small ribosomal subunit|membrane|cytosolic small ribosomal subunit|extracellular exosome|	1	1	1	1	0	1	1	0	0	1	Known	polyA	polyA	3.03467	Moderate	Ribosomal_S13	N/A	N/A	N/A	N/A	N/A	N/A	N/A
Q9H501	Esf1	ESF1 homolog	poly(A) RNA binding|	extracellular space|nucleoplasm|nucleolus|	1	1	1	1	0	1	0	0	1	1	Known	polyA	polyA	3.03533	Moderate	NUC153	N/A	N/A	N/A	N/A	N/A	N/A	N/A
Q00325	Slc25a3	Phosphate carrier protein, mitochondrial	symporter activity|phosphate ion carrier activity|protein complex binding|	mitochondrion|mitochondrial inner membrane|integral component of plasma membrane|membrane|myelin sheath|extracellular exosome|	1	0	1	0	1	0	0	0	0	0	Known	Non-polyA	N/A	3.03567	Moderate	Mito_carr*3	N/A	N/A	N/A	N/A	N/A	N/A	N/A
P33981	Ttk	Dual specificity protein kinase TTK	protein serine/threonine kinase activity|protein serine/threonine/tyrosine kinase activity|protein tyrosine kinase activity|protein binding|ATP binding|	spindle|membrane|	1	0	1	0	0	0	0	0	0	0	Known	Non-polyA	N/A	3.03833	Moderate	Pkinase	N/A	N/A	N/A	N/A	N/A	N/A	N/A
P08865	Rpsa	40S ribosomal protein SA	structural constituent of ribosome|laminin receptor activity|protein binding|ribosome binding|laminin binding|poly(A) RNA binding|	nucleus|cytoplasm|cytosol|plasma membrane|membrane|cytosolic small ribosomal subunit|90S preribosome|extracellular exosome|	1	1	1	1	1	0	0	0	0	1	Known	polyA	polyA	3.039	Moderate	Ribosomal_S2*2	40S_SA_C	N/A	N/A	N/A	N/A	N/A	N/A
Q7Z333	Setx	Probable helicase senataxin	transcription termination site sequence-specific DNA binding|DNA binding|DNA helicase activity|protein binding|ATP binding|identical protein binding|	nuclear chromosome|chromosome, telomeric region|nucleus|nucleoplasm|nucleolus|cytoplasm|axon|growth cone|	0	0	0	0	0	1	0	0	0	0	Known	Non-polyA	mRNA (Gerstberger, S., et al. Nat. Rev. Genetics. 2014. )	3.04067	Moderate	AAA_11	AAA_12	N/A	N/A	N/A	N/A	N/A	N/A
P50748	Kntc1	Kinetochore-associated protein 1	protein binding|	condensed chromosome kinetochore|spindle pole|nucleus|cytoplasm|kinetochore microtubule|cytosol|plasma membrane|actin cytoskeleton|RZZ complex|	1	0	0	0	0	0	0	0	0	0	Known	Non-polyA	N/A	3.04333	Moderate	Rod C	N/A	N/A	N/A	N/A	N/A	N/A	N/A
Q9UPT9	Usp22	Ubiquitin carboxyl-terminal hydrolase 22	transcription coactivator activity|cysteine-type endopeptidase activity|ubiquitin-specific protease activity|protein binding|zinc ion binding|enzyme binding|ligand-dependent nuclear receptor transcription coactivator activity|ubiquitin-specific protease activity|H4 histone acetyltransferase activity|	SAGA complex|SAGA-type complex|	0	0	0	0	0	0	0	0	0	0	Orphan	Non-polyA	N/A	3.04467	Moderate	zf-UBP	UCH	N/A	N/A	N/A	N/A	N/A	N/A
P45973	Cbx5	Chromobox protein homolog 5	chromatin binding|protein binding|protein binding, bridging|methylated histone binding|protein homodimerization activity|histone deacetylase binding|repressing transcription factor binding|	histone deacetylase complex|kinetochore|nucleus|nuclear envelope|nucleoplasm|nuclear heterochromatin|nucleolus|chromocenter|transcriptional repressor complex|nuclear pericentric heterochromatin|histone methyltransferase complex|PML body|	1	0	0	0	0	0	0	0	0	0	Known	Non-polyA	N/A	3.04767	Moderate	Chromo	Chromo_shadow	N/A	N/A	N/A	N/A	N/A	N/A
Q9H2P0	Adnp	Activity-dependent neuroprotector homeobox protein	DNA binding|chromatin binding|copper ion binding|protein binding|peptide binding|beta-tubulin binding|	extracellular space|nucleus|cytoplasm|axon|dendrite|neuronal cell body|	1	0	1	0	0	0	0	0	0	0	Known	Non-polyA	mRNA (Schirer Y., et al. Plos one. 2014.)	3.04767	Moderate	Homeodomain	N/A	N/A	N/A	N/A	N/A	N/A	N/A
Q8N9T8	Kri1	Protein KRI1 homolog	poly(A) RNA binding|	nucleolus|	1	1	1	0	0	0	0	0	1	1	Known	polyA	polyA	3.04833	Moderate	Kri1	Kri1_C	N/A	N/A	N/A	N/A	N/A	N/A
P78347	Gtf2i	General transcription factor II-I	DNA binding|sequence-specific DNA binding transcription factor activity|protein binding|mitogen-activated protein kinase binding|	nucleus|nucleoplasm|cytoplasm|membrane|cell projection|neuronal cell body|	1	0	1	0	0	0	0	0	0	1	Known	polyA	polyA	3.049	Moderate	GTF2I*6	N/A	N/A	N/A	N/A	N/A	N/A	N/A
Q14527	Hltf	Helicase-like transcription factor	RNA polymerase II core promoter proximal region sequence-specific DNA binding|RNA polymerase II core promoter proximal region sequence-specific DNA binding transcription factor activity involved in positive regulation of transcription|DNA binding|helicase activity|protein binding|ATP binding|zinc ion binding|ligase activity|ATPase activity|poly(A) RNA binding|ubiquitin protein ligase activity|	nucleus|nucleoplasm|nucleolus|cytoplasm|membrane|	0	0	0	0	0	0	0	0	1	0	Known	polyA	polyA	3.05133	Moderate	HIRAN	zf-C3HC4_3	SNF2_N	Helicase C	N/A	N/A	N/A	N/A
O14654	Irs4	Insulin receptor substrate 4	signal transducer activity|SH3/SH2 adaptor activity|insulin receptor binding|protein binding|phosphatidylinositol 3-kinase binding|	cytosol|plasma membrane|	0	0	0	0	0	0	0	0	0	0	Orphan	Non-polyA	N/A	3.05133	Moderate	IRS	N/A	N/A	N/A	N/A	N/A	N/A	N/A
Q9UKN8	Gtf3c4	General transcription factor 3C polypeptide 4	histone acetyltransferase activity|protein binding|enzyme activator activity|DNA binding|	transcription factor TFIIIC complex|nucleoplasm|	1	0	0	0	0	0	0	0	0	0	Known	Non-polyA	tRNA (Dumay-Odelot H., et al. J. Biol. Chem. 2007.)	3.056	Moderate	TFIIIC_delta	zf-TFIIIC	N/A	N/A	N/A	N/A	N/A	N/A
P35606	Copb2	Coatomer subunit beta'	structural molecule activity|	cytosol|COPI vesicle coat|	1	0	1	0	0	0	0	0	0	0	Known	Non-polyA	N/A	3.06	Moderate	WD40*4	Coatomer_WDAD	N/A	N/A	N/A	N/A	N/A	N/A
P00505	Got2	Aspartate aminotransferase, mitochondrial	L-aspartate:2-oxoglutarate aminotransferase activity|phospholipid binding|kynurenine-oxoglutarate transaminase activity|amino acid binding|enzyme binding|pyridoxal phosphate binding|protein homodimerization activity|poly(A) RNA binding|L-phenylalanine:2-oxoglutarate aminotransferase activity|	mitochondrion|mitochondrial inner membrane|mitochondrial matrix|plasma membrane|cell surface|perikaryon|myelin sheath|protein complex|extracellular exosome|	1	0	0	1	1	0	0	0	0	0	Known	polyA	polyA	3.06133	Moderate	Aminotran_1_2	N/A	N/A	N/A	N/A	N/A	N/A	N/A
P35579	Myh9	Myosin-9	microfilament motor activity|motor activity|actin binding|protein binding|calmodulin binding|ATP binding|ATPase activity|protein domain specific binding|actin-dependent ATPase activity|protein homodimerization activity|protein anchor|ADP binding|poly(A) RNA binding|actin filament binding|actin-dependent ATPase activity|actin filament binding|	stress fiber|ruffle|uropod|nucleus|cytoplasm|spindle|actomyosin contractile ring|cytosol|plasma membrane|brush border|cell-cell adherens junction|actin cytoskeleton|membrane|myosin II complex|cell leading edge|neuromuscular junction|cleavage furrow|actomyosin|protein complex|extracellular exosome|myosin II filament|immunological synapse|plasma membrane|focal adhesion|COP9 signalosome|integrin com…	1	1	1	1	0	0	0	0	0	0	Known	polyA	polyA	3.06167	Moderate	Myosin_N	Myosin_head	Myosin_tail_1	N/A	N/A	N/A	N/A	N/A
Q15003	Ncaph	Condensin complex subunit 2	protein binding|	condensin complex|nucleus|cytoplasm|cytosol|membrane|	1	0	0	0	0	0	0	0	0	0	Known	Non-polyA	N/A	3.063	Moderate	Cnd2	N/A	N/A	N/A	N/A	N/A	N/A	N/A
P62495	Etf1	Eukaryotic peptide chain release factor subunit 1	RNA binding|translation release factor activity|protein binding|translation termination factor activity|translation release factor activity, codon specific|ribosome binding|poly(A) RNA binding|	cytoplasm|cytosol|translation release factor complex|nucleus|	1	0	1	0	0	1	0	0	1	1	Known	polyA	polyA	3.066	Moderate	eRF1_1	eRF1_2	eRF1_3	N/A	N/A	N/A	N/A	N/A
Q9H9A6	Lrrc40	Leucine-rich repeat-containing protein 40	N/A	membrane|	0	0	1	0	0	0	0	0	0	0	Known	Non-polyA	N/A	3.06667	Moderate	LRR_8*4	LRR_1	N/A	N/A	N/A	N/A	N/A	N/A
Q9BVI4	Noc4l	Nucleolar complex protein 4 homolog	protein binding|poly(A) RNA binding|	nucleus|nucleolus|integral component of membrane|Noc4p-Nop14p complex|nuclear membrane|small-subunit processome|	0	0	1	0	0	0	0	0	1	0	Known	polyA	polyA	3.06733	Moderate	CBF	N/A	N/A	N/A	N/A	N/A	N/A	N/A
P05198	Eif2s1	Eukaryotic translation initiation factor 2 subunit 1	translation initiation factor activity|protein binding|ribosome binding|poly(A) RNA binding|	nucleus|cytosol|ribosome|polysome|eukaryotic translation initiation factor 2 complex|cytoplasmic stress granule|membrane|eukaryotic 48S preinitiation complex|multi-eIF complex|extracellular exosome|eukaryotic translation initiation factor 2B complex|	1	1	1	1	0	1	0	0	1	1	Known	polyA	polyA	3.071	Moderate	S1	EIF_2_alpha	N/A	N/A	N/A	N/A	N/A	N/A
P21359	Nf1	Neurofibromin	GTPase activator activity|protein binding|phosphatidylethanolamine binding|phosphatidylcholine binding|	nucleus|nucleolus|cytoplasm|membrane|axon|dendrite|intrinsic component of the cytoplasmic side of the plasma membrane|	1	0	1	0	0	0	0	0	0	0	Known	Non-polyA	N/A	3.07233	Moderate	RasGAP	CRAL_TRIO_2	N/A	N/A	N/A	N/A	N/A	N/A
Q49A26	Glyr1	Putative oxidoreductase GLYR1	DNA binding|phosphogluconate dehydrogenase (decarboxylating) activity|protein binding|methylated histone binding|NAD binding|	nucleoplasm|cytoplasm|Golgi apparatus|	0	0	0	0	0	0	0	0	0	0	Orphan	Non-polyA	N/A	3.073	Moderate	PWWP	NAD_binding_2	NAD_binding_11	N/A	N/A	N/A	N/A	N/A
P53396	Acly	ATP-citrate synthase	ATP citrate synthase activity|protein binding|ATP binding|metal ion binding|cofactor binding|	nucleoplasm|cytoplasm|mitochondrion|cytosol|plasma membrane|citrate lyase complex|membrane|extracellular exosome|	1	0	0	0	1	0	0	0	0	0	Known	Non-polyA	N/A	3.07367	Moderate	Citrate_bind	CoA_binding	Ligase_CoA	Citrate_synt	N/A	N/A	N/A	N/A
Q99829	Cpne1	Copine-1	phosphatidylserine binding|endopeptidase activity|transporter activity|calcium ion binding|calcium-dependent phospholipid binding|protein homodimerization activity|NF-kappaB binding|	nucleus|cytoplasm|cytosol|plasma membrane|membrane|extracellular exosome|	0	0	0	0	1	0	0	0	0	0	Known	Non-polyA	N/A	3.077	Moderate	C2*2	Copine	N/A	N/A	N/A	N/A	N/A	N/A
Q08J23	Nsun2	tRNA (cytosine(34)-C(5))-methyltransferase	tRNA binding|tRNA (cytosine-5-)-methyltransferase activity|poly(A) RNA binding|	nucleus|nucleolus|cytoplasm|spindle|chromatoid body|	1	1	1	1	1	1	0	1	1	0	Known	polyA	polyA	3.08267	Moderate	Methyltr_RsmB-F	N/A	N/A	N/A	N/A	N/A	N/A	N/A
P31271	Hoxa13	Homeobox protein Hox-A13	DNA binding|sequence-specific DNA binding transcription factor activity|sequence-specific DNA binding|transcription regulatory region DNA binding|	nucleus|nucleoplasm|intermediate filament cytoskeleton|	0	0	0	0	0	0	0	0	0	0	Orphan	Non-polyA	N/A	3.08433	Moderate	HoxA13_N	Homeodomain	N/A	N/A	N/A	N/A	N/A	N/A
O75152	Zc3h11a	Zinc finger CCCH domain-containing protein 11A	protein binding|poly(A) RNA binding|metal ion binding|	intracellular|transcription export complex|	1	1	1	1	1	1	1	1	1	1	Known	polyA	polyA	3.093	Moderate	zf-CCCH 3	N/A	N/A	N/A	N/A	N/A	N/A	N/A
P62277	Rps13	40S ribosomal protein S13	mRNA binding|structural constituent of ribosome|protein binding|poly(A) RNA binding|small ribosomal subunit rRNA binding|	nucleus|nucleolus|cytosol|ribosome|focal adhesion|membrane|cytosolic small ribosomal subunit|extracellular exosome|	1	1	1	1	1	1	0	1	0	1	Known	polyA	polyA	3.09367	Moderate	Ribosomal_S13_N	Ribosomal_S15	N/A	N/A	N/A	N/A	N/A	N/A
P22102	Gart	Trifunctional purine biosynthetic protein adenosine-3	phosphoribosylamine-glycine ligase activity|phosphoribosylformylglycinamidine cyclo-ligase activity|phosphoribosylglycinamide formyltransferase activity|ATP binding|methyltransferase activity|metal ion binding|	cytosol|extracellular exosome|	1	0	1	0	0	0	0	0	0	0	Known	Non-polyA	N/A	3.09467	Moderate	GARS_N	GARS_A	GARS_C	AIRS	AIRS_C	N/A	N/A	N/A
Q9NQW6	Anln	Anillin	actin binding|protein binding|	nucleoplasm|actomyosin contractile ring|actin cytoskeleton|intracellular membrane-bounded organelle|	1	0	0	0	0	0	0	0	0	0	Known	Non-polyA	N/A	3.097	Moderate	Anillin_N*2	Anillin	PH	N/A	N/A	N/A	N/A	N/A
O95503	Cbx6	Chromobox protein homolog 6	single-stranded RNA binding|protein binding|	heterochromatin|nucleus|nucleoplasm|PcG protein complex|	0	0	0	0	0	1	0	0	0	0	Known	Non-polyA	N/A	3.101	Moderate	Chromo	CBX7_C	N/A	N/A	N/A	N/A	N/A	N/A
Q9HCK8	Chd8	Chromodomain-helicase-DNA-binding protein 8	p53 binding|DNA binding|DNA helicase activity|chromatin binding|protein binding|ATP binding|beta-catenin binding|DNA-dependent ATPase activity|methylated histone binding|histone binding|	nucleus|nucleoplasm|protein complex|MLL1 complex|	1	0	1	0	0	0	0	0	0	0	Known	Non-polyA	ncRNA (Wilkinson B., et al. Translational Psychiatry. 2015.)	3.10533	Moderate	Chromo	Chromo	SNF2_N	Helicase C	BRK	N/A	N/A	N/A
Q96N67	Dock7	Dedicator of cytokinesis protein 7	guanyl-nucleotide exchange factor activity|Rac GTPase binding|	focal adhesion|axon|growth cone|neuron projection|basal part of cell|COP9 signalosome|	1	0	1	0	0	0	0	0	0	0	Known	Non-polyA	N/A	3.10567	Moderate	DUF3398	DOCK-C2	DHR-2	N/A	N/A	N/A	N/A	N/A
Q5VY60	Haus6	HAUS augmin-like complex subunit 6	0	nucleoplasm|cytoplasm|microtubule organizing center|HAUS complex|	1	0	0	0	0	0	0	0	0	0	Known	Non-polyA	N/A	3.10733	Moderate	HAUS6_N	N/A	N/A	N/A	N/A	N/A	N/A	N/A
Q96JM3	Champ1	Chromosome alignment-maintaining phosphoprotein 1	nucleic acid binding|protein binding|metal ion binding|	condensed chromosome kinetochore|condensed chromosome|nucleus|nucleoplasm|cytoplasm|spindle|	1	0	0	0	0	0	0	0	0	0	Known	Non-polyA	N/A	3.10767	Moderate	N/A	N/A	N/A	N/A	N/A	N/A	N/A	N/A
P23526	Ahcy	Adenosylhomocysteinase	adenosylhomocysteinase activity|protein binding|adenyl nucleotide binding|identical protein binding|NAD binding|	nucleus|cytoplasm|cytosol|melanosome|neuron projection|extracellular exosome|	1	0	0	0	1	0	0	0	0	0	Known	Non-polyA	N/A	3.108	Moderate	AdoHcyase*2	AdoHcyase_NAD	N/A	N/A	N/A	N/A	N/A	N/A
Q9Y3I0	Rtcb	tRNA-splicing ligase RtcB homolog	RNA ligase (ATP) activity|protein binding|ATP binding|vinculin binding|poly(A) RNA binding|metal ion binding|	nucleus|nuclear envelope|cytoplasm|endoplasmic reticulum membrane|tRNA-splicing ligase complex|	1	1	1	0	1	0	1	1	0	0	Known	polyA	polyA	3.108	Moderate	RtcB	N/A	N/A	N/A	N/A	N/A	N/A	N/A
Q9UGR2	Zc3h7b	Zinc finger CCCH domain-containing protein 7B	protein binding|poly(A) RNA binding|metal ion binding|	nucleus|	1	1	1	1	0	1	0	0	1	1	Known	polyA	polyA	3.109	Moderate	TPR 8	zf-CCCH*2	N/A	N/A	N/A	N/A	N/A	N/A
Q6Q0C0	Traf7	E3 ubiquitin-protein ligase TRAF7	ubiquitin-protein transferase activity|protein binding|zinc ion binding|ligase activity|	ubiquitin ligase complex|nucleus|cytosol|plasma membrane|cytoplasmic membrane-bounded vesicle|intracellular membrane-bounded organelle|perinuclear region of cytoplasm|	0	0	0	0	0	0	0	0	0	0	Orphan	Non-polyA	N/A	3.10933	Moderate	zf-RING_UBOX	WD40	WD40	WD40	WD40	N/A	N/A	N/A
Q6PCB5	Rsbn1l	Round spermatid basic protein 1-like protein	0	nucleus|	0	0	0	0	0	0	0	0	0	0	Orphan	Non-polyA	N/A	3.10967	Moderate	N/A	N/A	N/A	N/A	N/A	N/A	N/A	N/A
Q9Y4A5	Trrap	Transformation/transcription domain-associated protein	transcription cofactor activity|transcription coactivator activity|protein binding|kinase activity|phosphotransferase activity, alcohol group as acceptor|	PCAF complex|Swr1 complex|nucleus|nucleoplasm|Golgi apparatus|STAGA complex|transcription factor TFTC complex|NuA4 histone acetyltransferase complex|	1	0	1	0	0	0	0	0	0	0	Known	Non-polyA	N/A	3.11167	Moderate	FAT	PI3_PI4_kinase	N/A	N/A	N/A	N/A	N/A	N/A
Q9NYH9	Utp6	U3 small nucleolar RNA-associated protein 6 homolog	snoRNA binding|	nucleolus|small-subunit processome|Pwp2p-containing subcomplex of 90S preribosome|	1	1	1	0	0	1	0	0	0	0	Known	polyA	polyA	3.11333	Moderate	U3_assoc_6	N/A	N/A	N/A	N/A	N/A	N/A	N/A
Q9HAV4	Xpo5	Exportin-5	tRNA binding|RNA binding|mRNA binding|protein binding|Ran GTPase binding|protein transporter activity|poly(A) RNA binding|pre-miRNA binding|pre-miRNA binding|	nucleus|nucleoplasm|cytoplasm|cytosol|RNA nuclear export complex|	1	1	1	1	1	1	0	0	1	1	Known	polyA	polyA	3.11433	Moderate	Xpo1	N/A	N/A	N/A	N/A	N/A	N/A	N/A
O60293	Zfc3h1	Zinc finger C3H1 domain-containing protein	protein binding|poly(A) RNA binding|metal ion binding|	extracellular space|intracellular|	1	0	1	0	0	0	0	0	1	0	Known	polyA	polyA	3.11467	Moderate	zf-C3H1	N/A	N/A	N/A	N/A	N/A	N/A	N/A
Q15361	Ttf1	Transcription termination factor 1	DNA binding|chromatin binding|	nucleus|nucleoplasm|nucleolus|cytoplasm|plasma membrane|	0	0	1	0	0	0	0	0	0	0	Known	Non-polyA	N/A	3.11867	Moderate	Myb_DNA-bind_6	N/A	N/A	N/A	N/A	N/A	N/A	N/A
P46778	Rpl21	60S ribosomal protein L21	RNA binding|structural constituent of ribosome|poly(A) RNA binding|	nucleolus|cytoplasm|cytosol|membrane|cytosolic large ribosomal subunit|	1	1	1	1	1	0	0	1	1	0	Known	polyA	polyA	3.11933	Moderate	Ribosomal_L21e	N/A	N/A	N/A	N/A	N/A	N/A	N/A
Q6ZW49	Paxip1	PAX-interacting protein 1	protein binding|	nucleus|nuclear matrix|histone methyltransferase complex|	0	0	0	0	0	0	0	0	0	0	Orphan	Non-polyA	N/A	3.12633	Moderate	PTCB-BRCT	BRCT*3	N/A	N/A	N/A	N/A	N/A	N/A
Q96PZ0	Pus7	Pseudouridylate synthase 7 homolog	pseudouridine synthase activity|enzyme binding|poly(A) RNA binding|	nucleus|	0	0	1	1	1	1	0	0	1	0	Known	polyA	polyA	3.128	Moderate	TruD	N/A	N/A	N/A	N/A	N/A	N/A	N/A
Q6P2E9	Edc4	Enhancer of mRNA-decapping protein 4	protein binding|	cytoplasmic mRNA processing body|nucleus|nucleoplasm|cytoplasm|cytosol|membrane|intracellular membrane-bounded organelle|	1	0	1	0	0	0	0	0	0	0	Known	Non-polyA	mRNA (Gerstberger, S., et al. Nat. Rev. Genetics. 2008. )	3.129	Moderate	Ge1_WD40	N/A	N/A	N/A	N/A	N/A	N/A	N/A
Q9UHI6	Ddx20	Probable ATP-dependent RNA helicase DDX20	DNA binding|ATP-dependent RNA helicase activity|protein binding|ATP binding|protein domain specific binding|repressing transcription factor binding|	nucleus|nucleoplasm|cytoplasm|cytosol|cytoskeleton|membrane|transcriptional repressor complex|SMN complex|SMN-Sm protein complex|Gemini of coiled bodies|	1	0	1	0	0	1	0	0	0	0	Known	Non-polyA	snRNA (Gerstberger, S., et al. Nat. Rev. Genetics. 2013. )	3.12933	Moderate	DEAD	Helicase C	N/A	N/A	N/A	N/A	N/A	N/A
Q9H9B1	Ehmt1	Histone-lysine N-methyltransferase EHMT1	p53 binding|protein binding|methyltransferase activity|zinc ion binding|protein-lysine N-methyltransferase activity|histone-lysine N-methyltransferase activity|histone methyltransferase activity (H3-K9 specific)|histone methyltransferase activity (H3-K27 specific)|	nucleus|nucleoplasm|chromosome|cytoplasm|plasma membrane|	1	0	0	0	0	0	0	0	0	0	Known	Non-polyA	N/A	3.12967	Moderate	Ank2*3	Pre-SET	SET	N/A	N/A	N/A	N/A	N/A
Q9UPN9	Trim33	E3 ubiquitin-protein ligase TRIM33	DNA binding|ubiquitin-protein transferase activity|protein binding|zinc ion binding|ligase activity|co-SMAD binding|R-SMAD binding|	nucleus|nucleoplasm|intracellular membrane-bounded organelle|	1	0	0	0	0	0	0	0	0	0	Known	Non-polyA	N/A	3.12967	Moderate	zf-RING_UBOX	zf-B_box	PHD	Bromodomain	N/A	N/A	N/A	N/A
P26358	Dnmt1	DNA (cytosine-5)-methyltransferase 1	DNA binding|chromatin binding|RNA binding|DNA (cytosine-5-)-methyltransferase activity|protein binding|transcription factor binding|zinc ion binding|methyl-CpG binding|DNA-methyltransferase activity|	nucleus|nucleoplasm|replication fork|pericentric heterochromatin|	1	0	0	0	0	1	0	0	0	0	Known	Non-polyA	ncRNA (Gerstberger, S., et al. Nat. Rev. Genetics. 2014. )	3.132	Moderate	DMAP_binding	DNMT1-RFD	zf-CXXC	BAH	BAH	DNA_methylase	N/A	N/A
Q14997	Psme4	Proteasome activator complex subunit 4	protein binding|peptidase activator activity|lysine-acetylated histone binding|	nucleus|cytosol|nuclear speck|spermatoproteasome complex|	1	0	0	0	0	0	0	0	0	0	Known	Non-polyA	N/A	3.13267	Moderate	BLM10_mid	DUF3437	N/A	N/A	N/A	N/A	N/A	N/A
P42695	Ncapd3	Condensin-2 complex subunit D3	chromatin binding|protein binding|methylated histone binding|	condensed chromosome, centromeric region|nuclear condensin complex|nucleoplasm|membrane|nuclear pericentric heterochromatin|germinal vesicle|	1	0	1	0	0	0	0	0	0	0	Known	Non-polyA	N/A	3.13267	Moderate	Cnd1	N/A	N/A	N/A	N/A	N/A	N/A	N/A
O14617	Ap3d1	AP-3 complex subunit delta-1	transporter activity|	Golgi membrane|nucleoplasm|lysosomal membrane|Golgi apparatus|endosome membrane|membrane|membrane coat|terminal bouton|	1	0	1	0	0	0	0	0	0	0	Known	Non-polyA	N/A	3.133	Moderate	Adaptin_N	Ap3d1	N/A	N/A	N/A	N/A	N/A	N/A
P15311	Ezr	Ezrin	protein binding|microtubule binding|protein domain specific binding|protein kinase A catalytic subunit binding|protein kinase A regulatory subunit binding|S100 protein binding|poly(A) RNA binding|cell adhesion molecule binding|actin filament binding|	ruffle|uropod|extracellular space|nucleolus|cytoplasm|endosome|cytosol|actin filament|plasma membrane|microvillus|brush border|focal adhesion|actin cytoskeleton|membrane|basolateral plasma membrane|apical plasma membrane|extrinsic component of membrane|filopodium|T-tubule|cortical cytoskeleton|microvillus membrane|vesicle|ruffle membrane|ciliary basal body|cell projection|myelin sheath|cell body|…	1	0	1	1	1	0	0	0	1	0	Known	polyA	polyA	3.14167	Moderate	FERM_N	FERM_M	FERM_C	ERM	N/A	N/A	N/A	N/A
P54886	Aldh18a1	Delta-1-pyrroline-5-carboxylate synthase	glutamate 5-kinase activity|glutamate-5-semialdehyde dehydrogenase activity|protein binding|ATP binding|poly(A) RNA binding|	cytoplasm|mitochondrion|mitochondrial inner membrane|	1	0	1	0	1	0	0	1	1	0	Known	polyA	polyA	3.14233	Moderate	AA_kinase	Aldedh	N/A	N/A	N/A	N/A	N/A	N/A
P26599	Ptbp1	Polypyrimidine tract-binding protein 1	nucleotide binding|RNA binding|protein binding|poly-pyrimidine tract binding|pre-mRNA binding|poly(A) RNA binding|	nucleoplasm|nucleolus|membrane|extracellular exosome|	1	1	1	1	1	1	1	1	1	1	Known	polyA	polyA	3.14767	Moderate	RRM_1	RRM_5*2	RRM_6	N/A	N/A	N/A	N/A	N/A
B0QY89	Eif3l	Eukaryotic translation initiation factor 3 subunit L	translation initiation factor activity|	eukaryotic translation initiation factor 3 complex|eukaryotic 43S preinitiation complex|eukaryotic 48S preinitiation complex|	0	0	1	1	1	1	0	0	1	1	Known	polyA	polyA	3.14833	Moderate	Paf67	N/A	N/A	N/A	N/A	N/A	N/A	N/A
Q8N9N2-2	Ascc1	Isoform 2 of Activating signal cointegrator 1 complex subunit 1	RNA binding|protein binding|	nucleoplasm|transcription factor complex|cytoplasm|	0	0	0	0	0	1	0	0	0	0	Known	Non-polyA	pre-mRNA (Knierim E., et al. Am. J. Hum. Genet. 2016.)	3.15133	Moderate	KH_1	AKAP7_NLS	N/A	N/A	N/A	N/A	N/A	N/A
Q96FW1	Otub1	Ubiquitin thioesterase OTUB1	ubiquitin-specific protease activity|protein binding|NEDD8-specific protease activity|ubiquitin protein ligase binding|ubiquitin binding|	nucleus|cytoplasm|extracellular exosome|	1	0	0	0	0	0	0	0	0	0	Known	Non-polyA	N/A	3.15167	Moderate	Peptidase_C65	N/A	N/A	N/A	N/A	N/A	N/A	N/A
O00178	Gtpbp1	GTP-binding protein 1	GTPase activity|GTP binding|poly(A) RNA binding|	cytoplasmic exosome (RNase complex)|cytosol|membrane|	0	0	1	0	0	1	0	0	1	0	Known	polyA	polyA	3.15967	Moderate	GTP_EFTU	N/A	N/A	N/A	N/A	N/A	N/A	N/A
P52732	Kif11	Kinesin-like protein KIF11	microtubule motor activity|ATP binding|microtubule binding|ATP-dependent microtubule motor activity, plus-end-directed|protein kinase binding|protein complex binding|	cytoplasm|spindle|cytosol|kinesin complex|microtubule|membrane|spindle pole|spindle microtubule|	1	0	1	0	0	0	0	0	0	0	Known	Non-polyA	mRNA (Song T., et al. J. Cell. Sci. 2015. )	3.16133	Moderate	Kinesin	Microtub_bind	N/A	N/A	N/A	N/A	N/A	N/A
P40939	Hadha	Trifunctional enzyme subunit alpha, mitochondrial	fatty-acyl-CoA binding|3-hydroxyacyl-CoA dehydrogenase activity|acetyl-CoA C-acetyltransferase activity|enoyl-CoA hydratase activity|protein binding|long-chain-enoyl-CoA hydratase activity|long-chain-3-hydroxyacyl-CoA dehydrogenase activity|protein complex binding|NAD binding|	mitochondrion|mitochondrial inner membrane|mitochondrial fatty acid beta-oxidation multienzyme complex|mitochondrial nucleoid|	1	0	1	0	0	0	0	0	0	0	Known	Non-polyA	miRNA (Kakumani P.K., et al. BBRC.2015.)	3.163	Moderate	ECH_1	3HCDH_N	3HCDH	3HCDH	N/A	N/A	N/A	N/A
Q9H6R4	Nol6	Nucleolar protein 6	protein binding|poly(A) RNA binding|	condensed nuclear chromosome|nucleus|nucleolus|mitochondrion|small-subunit processome|CURI complex|UTP-C complex|	1	1	1	0	0	1	0	0	1	0	Known	polyA	polyA	3.164	Moderate	Nrap	Nrap_D2	Nrap_D3	Nrap_D4	Nrap_D5	Nrap_D6	N/A	N/A
Q92547	Topbp1	DNA topoisomerase 2-binding protein 1	DNA binding|protein binding|protein C-terminus binding|identical protein binding|	condensed nuclear chromosome|spindle pole|male germ cell nucleus|nucleus|chromosome|cytoplasm|Golgi apparatus|centrosome|actin cytoskeleton|PML body|	1	0	0	0	0	0	0	0	0	0	Known	Non-polyA	N/A	3.16467	Moderate	BRCT*6	N/A	N/A	N/A	N/A	N/A	N/A	N/A
P31939	Atic	Bifunctional purine biosynthesis protein PURH	IMP cyclohydrolase activity|phosphoribosylaminoimidazolecarboxamide formyltransferase activity|protein homodimerization activity|	mitochondrion|cytosol|membrane|extracellular exosome|	1	0	0	0	0	0	0	0	0	0	Known	Non-polyA	N/A	3.165	Moderate	MGS	AICARFT_IMPCHas	N/A	N/A	N/A	N/A	N/A	N/A
P14373	Trim27	Zinc finger protein RFP	nucleic acid binding|DNA binding|transmembrane receptor protein tyrosine kinase activity|ubiquitin-protein transferase activity|protein binding|zinc ion binding|ligase activity|metal ion binding|	nucleus|nucleoplasm|cytoplasm|endosome|early endosome|integral component of plasma membrane|membrane|PML body|nuclear membrane|retromer complex|	1	0	0	0	0	0	0	0	0	0	Known	Non-polyA	N/A	3.16733	Moderate	zf-C3HC4_4	zf-B_box	PRY	SPRY	N/A	N/A	N/A	N/A
Q09028	Rbbp4	Histone-binding protein RBBP4	protein binding|histone binding|histone deacetylase binding|RNA polymerase II core promoter proximal region sequence-specific DNA binding|RNA polymerase II distal enhancer sequence-specific DNA binding|DNA-dependent ATPase activity|nucleosomal DNA binding|	nuclear chromatin|nucleus|nucleoplasm|Sin3 complex|NuRD complex|NURF complex|CAF-1 complex|ESC/E(Z) complex|protein complex|	1	0	0	0	0	0	0	0	0	0	Known	Non-polyA	N/A	3.16767	Moderate	CAF1C_H4-bd	WD40*5	N/A	N/A	N/A	N/A	N/A	N/A
P55201	Brpf1	Peregrin	DNA binding|protein binding|zinc ion binding|	nucleus|nucleoplasm|cytoplasm|MOZ/MORF histone acetyltransferase complex|	0	0	1	0	0	0	0	0	0	0	Known	Non-polyA	N/A	3.16767	Moderate	EPL1	PHD_2	zf-HC5HC2H_2	Bromodomain	PWWP	N/A	N/A	N/A
Q9Y265	Ruvbl1	RuvB-like 1	DNA helicase activity|protein binding|ATP binding|ATPase activity|	Swr1 complex|nucleus|nucleoplasm|cytoplasm|Golgi apparatus|microtubule organizing center|membrane|nuclear matrix|Ino80 complex|NuA4 histone acetyltransferase complex|intracellular membrane-bounded organelle|extracellular exosome|MLL1 complex|	1	0	1	0	0	0	0	0	0	0	Known	Non-polyA	mRNA (Gerstberger, S., et al. Nat. Rev. Genetics. 2010. )	3.168	Moderate	TIP49	TIP49_C	N/A	N/A	N/A	N/A	N/A	N/A
Q9NTI5	Pds5b	Sister chromatid cohesion protein PDS5 homolog B	DNA binding|protein binding|ATP binding|	chromosome, centromeric region|chromatin|nucleus|nucleoplasm|chromosome|cytosol|	0	0	0	0	0	0	0	0	0	0	Orphan	Non-polyA	N/A	3.17033	Moderate	N/A	N/A	N/A	N/A	N/A	N/A	N/A	N/A
Q9BWE0	Repin1	Replication initiator 1	DNA binding|poly(A) RNA binding|metal ion binding|	nucleus|nucleoplasm|nuclear origin of replication recognition complex|lipid particle|cytosolic ribosome|nuclear membrane|	0	0	0	0	0	0	0	0	1	0	Known	polyA	polyA	3.17067	Moderate	zf-C2H2*10	N/A	N/A	N/A	N/A	N/A	N/A	N/A
P22314	Uba1	Ubiquitin-like modifier-activating enzyme 1	ubiquitin activating enzyme activity|ubiquitin-protein transferase activity|protein binding|ATP binding|poly(A) RNA binding|	nucleus|cytoplasm|mitochondrion|cytosol|extracellular exosome|heterochromatin|lysosomal membrane|endosome membrane|desmosome|rough endoplasmic reticulum membrane|	1	0	1	1	1	0	0	0	1	0	Known	polyA	polyA	3.171	Moderate	ThiF*2	E1_FCCH	E1_4HB	UBA_e1_thiolCys	E1_UFD	N/A	N/A	N/A
Q9Y483	Mtf2	Metal-response element-binding transcription factor 2	DNA binding|zinc ion binding|methylated histone binding|	nucleus|nucleoplasm|cytoplasm|ESC/E(Z) complex|	0	0	0	0	0	0	0	0	0	0	Orphan	Non-polyA	N/A	3.17167	Moderate	Tudor_2	PHD	Mtf2_C	N/A	N/A	N/A	N/A	N/A
Q6P0N0	Mis18bp1	Mis18-binding protein 1	DNA binding|protein binding|	chromosome, centromeric region|nucleoplasm|	0	0	0	0	0	0	0	0	0	0	Orphan	Non-polyA	N/A	3.17433	Moderate	SANTA	Myb_DNA-binding	N/A	N/A	N/A	N/A	N/A	N/A
Q9NRL2	Baz1a	Bromodomain adjacent to zinc finger domain protein 1A	protein binding|zinc ion binding|histone acetyltransferase activity|	nuclear chromosome|CHRAC|ACF complex|	1	0	1	0	0	0	0	0	0	0	Known	Non-polyA	N/A	3.17667	Moderate	WAC_Acf1_DNA_bd	DDT	WHIM1	WSD	PHD	Bromodomain	N/A	N/A
Q6P3X3	Ttc27	Tetratricopeptide repeat protein 27	N/A	N/A	0	0	0	0	0	0	0	0	0	0	Orphan	Non-polyA	N/A	3.179	Moderate	TPR_2	N/A	N/A	N/A	N/A	N/A	N/A	N/A
Q13547	Hdac1	Histone deacetylase 1	transcription regulatory region sequence-specific DNA binding|core promoter binding|RNA polymerase II repressing transcription factor binding|RNA polymerase II transcription corepressor activity|sequence-specific DNA binding transcription factor activity|histone deacetylase activity|protein binding|transcription factor binding|deacetylase activity|enzyme binding|NAD-dependent histone deacetylase …	histone deacetylase complex|chromatin|nuclear chromatin|nucleus|nucleoplasm|cytoplasm|cytosol|Sin3 complex|NuRD complex|protein complex|	1	0	0	0	0	0	0	0	0	0	Known	Non-polyA	pre-mRNA (Khan D.H., et al. Nucleic Acid Res. 2013. )	3.185	Moderate	Hist_deacetyl	N/A	N/A	N/A	N/A	N/A	N/A	N/A
E9PD53	Smc4	Structural maintenance of chromosomes protein	ATP binding|	nucleoplasm|chromosome|cytoplasm|	1	0	1	0	1	0	0	0	0	0	Known	Non-polyA	N/A	3.18567	Moderate	SMC_C	SMC_hinge	N/A	N/A	N/A	N/A	N/A	N/A
P52701	Msh6	DNA mismatch repair protein Msh6	chromatin binding|protein binding|DNA-dependent ATPase activity|mismatched DNA binding|methylated histone binding|protein homodimerization activity|magnesium ion binding|four-way junction DNA binding|double-stranded DNA binding|protein binding|ATP binding|ATPase activity|mismatched DNA binding|guanine/thymine mispair binding|single guanine insertion binding|single thymine insertion binding|oxidiz…	nuclear chromosome|nuclear chromatin|nucleoplasm|cytoplasm|Golgi apparatus|plasma membrane|MutSalpha complex|intracellular membrane-bounded organelle|	1	0	0	0	0	0	0	0	0	0	Known	Non-polyA	N/A	3.18633	Moderate	PWWP	Muts I-V	N/A	N/A	N/A	N/A	N/A	N/A
P51610	Hcfc1	Host cell factor 1	RNA polymerase II distal enhancer sequence-specific DNA binding transcription factor activity involved in positive regulation of transcription|chromatin binding|sequence-specific DNA binding transcription factor activity|transcription coactivator activity|protein binding|identical protein binding|histone acetyltransferase activity (H4-K5 specific)|histone acetyltransferase activity (H4-K8 specifi…	histone acetyltransferase complex|nucleus|nucleoplasm|cytoplasm|mitochondrion|membrane|axon|dendrite|neuronal cell body|Set1C/COMPASS complex|MLL5-L complex|MLL1 complex|Ada2/Gcn5/Ada3 transcription activator complex|SAGA-type complex|	1	0	1	0	0	0	0	0	0	0	Known	Non-polyA	N/A	3.18733	Moderate	Kelch_1	Kelch_3	N/A	N/A	N/A	N/A	N/A	N/A
Q8NC60	Noa1	Nitric oxide-associated protein 1	GTPase activity|protein binding|GTP binding|poly(A) RNA binding|	mitochondrion|extrinsic component of mitochondrial inner membrane|	0	1	1	0	0	0	0	0	0	1	Known	polyA	polyA	3.18767	Moderate	MMR_HSR1	N/A	N/A	N/A	N/A	N/A	N/A	N/A
P38919	Eif4a3	Eukaryotic initiation factor 4A-III	mRNA binding|ATP-dependent RNA helicase activity|protein binding|ATP binding|poly(A) binding|poly(A) RNA binding|	nucleoplasm|cytoplasm|cytosol|membrane|nuclear speck|exon-exon junction complex|catalytic step 2 spliceosome|	1	1	1	1	1	1	0	0	1	1	Known	polyA	polyA	3.18867	Moderate	DEAD	Helicase_C	N/A	N/A	N/A	N/A	N/A	N/A
Q96DT7	Zbtb10	Zinc finger and BTB domain-containing protein 10	DNA binding|protein binding|metal ion binding|	nucleoplasm|	0	0	0	0	0	0	0	0	0	0	Orphan	Non-polyA	N/A	3.191	Moderate	BTB	zf-H2C2_5	N/A	N/A	N/A	N/A	N/A	N/A
Q9NV06	Dcaf13	DDB1- and CUL4-associated factor 13	poly(A) RNA binding|	nucleolus|small-subunit processome|Cul4-RING E3 ubiquitin ligase complex|	1	1	1	1	0	0	1	0	1	1	Known	polyA	polyA	3.19133	Moderate	WD40*3	eIF2A	Sof1	N/A	N/A	N/A	N/A	N/A
Q9UBW7	Zmym2	Zinc finger MYM-type protein 2	zinc ion binding|ubiquitin conjugating enzyme binding|	cytosol|PML body|	1	0	0	0	0	0	0	0	0	0	Known	Non-polyA	N/A	3.19133	Moderate	zf-FCS*8	DUF3504	N/A	N/A	N/A	N/A	N/A	N/A
Q9UPU5	Usp24	Ubiquitin carboxyl-terminal hydrolase 24	cysteine-type endopeptidase activity|ubiquitin-specific protease activity|	N/A	1	0	1	0	0	0	0	0	0	0	Known	Non-polyA	N/A	3.19233	Moderate	UCH	DUF3517	N/A	N/A	N/A	N/A	N/A	N/A
O75717	Wdhd1	WD repeat and HMG-box DNA-binding protein 1	DNA binding|chromatin binding|RNA binding|protein binding|RNA polymerase binding|	chromosome, centromeric region|nucleoplasm|cytoplasm|	1	0	0	0	0	1	0	0	0	0	Known	Non-polyA	ncRNA (Heish C., et al. Nucleic. Acids. Res. 2011.)	3.19267	Moderate	WD40*2	ANAPC4_WD40	Mcl1_mid	N/A	N/A	N/A	N/A	N/A
Q9NZJ4	Sacs	Sacsin	Hsp70 protein binding|chaperone binding|proteasome binding|	nucleus|cytoplasm|mitochondrion|axon|dendrite|cell body fiber|	1	0	0	0	0	0	0	0	0	0	Known	Non-polyA	N/A	3.19667	Moderate	ubiquitin	HEPN	N/A	N/A	N/A	N/A	N/A	N/A
O14929	Hat1	Histone acetyltransferase type B catalytic subunit	histone acetyltransferase activity|protein binding|H4 histone acetyltransferase activity|histone binding|	nuclear chromatin|nucleus|nucleoplasm|cytoplasm|nuclear matrix|intracellular membrane-bounded organelle|protein complex|	1	0	0	0	0	0	0	0	0	0	Known	Non-polyA	N/A	3.19867	Moderate	Hat1_N	N/A	N/A	N/A	N/A	N/A	N/A	N/A
P24752	Acat1	Acetyl-CoA acetyltransferase, mitochondrial	acetyl-CoA C-acetyltransferase activity|enzyme binding|protein homodimerization activity|metal ion binding|coenzyme binding|	mitochondrion|mitochondrial inner membrane|mitochondrial matrix|extracellular exosome|	1	0	0	0	1	0	0	1	0	0	Known	polyA	polyA	3.20033	Moderate	Thiolase_N	Thiolase_C	N/A	N/A	N/A	N/A	N/A	N/A
Q86UV5	Usp48	Ubiquitin carboxyl-terminal hydrolase 48	cysteine-type endopeptidase activity|ubiquitin-specific protease activity|	nucleoplasm|cytoplasm|mitochondrion|	0	0	0	0	0	0	0	0	0	0	Orphan	Non-polyA	N/A	3.20067	Moderate	UCH	N/A	N/A	N/A	N/A	N/A	N/A	N/A
F5H2F4	Mthfd1	C-1-tetrahydrofolate synthase, cytoplasmic	formate-tetrahydrofolate ligase activity|methylenetetrahydrofolate dehydrogenase (NADP+) activity|ATP binding|	cytosol|	1	0	1	0	0	0	0	1	0	0	Known	polyA	polyA	3.20067	Moderate	THF_DHG_CYH	THF_DHG_CYH_C	FTHFS	N/A	N/A	N/A	N/A	N/A
P35520	Cbs	Cystathionine beta-synthase	cystathionine beta-synthase activity|protein binding|oxygen binding|enzyme binding|heme binding|pyridoxal phosphate binding|ubiquitin protein ligase binding|identical protein binding|protein homodimerization activity|metal ion binding|nitrite reductase (NO-forming) activity|carbon monoxide binding|nitric oxide binding|modified amino acid binding|S-adenosyl-L-methionine binding|	nucleus|nucleolus|cytoplasm|cytosol|intracellular membrane-bounded organelle|	0	0	0	0	0	0	0	0	0	0	Orphan	Non-polyA	N/A	3.20167	Moderate	PALP	CBS	N/A	N/A	N/A	N/A	N/A	N/A
P17987	Tcp1	T-complex protein 1 subunit alpha	protein binding|ATP binding|ubiquitin protein ligase binding|poly(A) RNA binding|unfolded protein binding|	pericentriolar material|acrosomal vesicle|zona pellucida receptor complex|nuclear heterochromatin|Golgi apparatus|centrosome|cytosol|chaperonin-containing T-complex|microtubule|myelin sheath|cell body|extracellular exosome|	1	0	1	1	1	0	0	1	0	0	Known	polyA	polyA	3.20167	Moderate	Cpn60_TCP1	N/A	N/A	N/A	N/A	N/A	N/A	N/A
P68104	Eef1a1	Elongation factor 1-alpha 1	tRNA binding|translation elongation factor activity|GTPase activity|protein binding|GTP binding|protein kinase binding|poly(A) RNA binding|	extracellular space|nucleus|nucleolus|cytoplasm|cytosol|eukaryotic translation elongation factor 1 complex|membrane|cortical actin cytoskeleton|ruffle membrane|myelin sheath|extracellular exosome|nucleus|	0	0	1	1	1	1	0	0	1	0	Known	polyA	polyA	3.202	Moderate	GTP_EFTU	GTP_EFTU_D2	GTP_EFTU_D3	N/A	N/A	N/A	N/A	N/A
F8WAJ0	Ddx31	RNA helicase	RNA binding|ATP-dependent RNA helicase activity|ATP binding|	nucleolus|Golgi apparatus|intracellular membrane-bounded organelle|	0	1	1	1	1	1	0	0	1	1	Known	polyA	polyA	3.20333	Moderate	DEAD	Helicase_C	DUF4217	N/A	N/A	N/A	N/A	N/A
A0A0B4J1V9	Hells	Helicase, lymphoid-specific, isoform CRA_b	chromatin binding|helicase activity|ATP binding|	nucleus|pericentric heterochromatin|	0	0	0	0	0	0	0	0	0	0	Orphan	Non-polyA	N/A	3.20333	Moderate	SNF2_N	Helicase C	N/A	N/A	N/A	N/A	N/A	N/A
Q5T4S7	Ubr4	E3 ubiquitin-protein ligase UBR4	ubiquitin-protein transferase activity|protein binding|calmodulin binding|zinc ion binding|ligase activity|	nucleoplasm|cytoplasm|centrosome|membrane|integral component of membrane|	1	0	1	0	0	0	0	0	0	0	Known	Non-polyA	N/A	3.20567	Moderate	zf-UBR	E3_UbLigase_R4	N/A	N/A	N/A	N/A	N/A	N/A
O60318	Mcm3ap	Germinal-center associated nuclear protein	DNA binding|transferase activity, transferring acyl groups|	nucleus|nuclear pore|nucleoplasm|cytoplasm|cytosol|nuclear membrane|	1	0	0	0	0	0	0	0	0	0	Known	Non-polyA	N/A	3.212	Moderate	NupH_GANP	SAC3_GANP	CID_GANP	MCM3AP_GANP	N/A	N/A	N/A	N/A
Q8TEP8-3	Cep192	Isoform 3 of Centrosomal protein of 192 kDa	protein binding|phosphatase binding|	pericentriolar material|cytoplasm|centrosome|centriole|cytosol|	1	0	0	0	0	0	0	0	0	0	Known	Non-polyA	N/A	3.21267	Moderate	N/A	N/A	N/A	N/A	N/A	N/A	N/A	N/A
Q9H6S0	Ythdc2	Probable ATP-dependent RNA helicase YTHDC2	ATP-dependent RNA helicase activity|protein binding|ATP binding|RNA-dependent ATPase activity|poly(A) RNA binding|RNA polymerase binding|	cytoplasm|endoplasmic reticulum|endoplasmic reticulum|	1	1	1	1	0	1	0	0	1	1	Known	polyA	polyA	3.213	Moderate	R3H	DEAD	Helicase C	HA2	OB_NTP_bind	YTH	YTH	N/A
P13489	Rnh1	Ribonuclease inhibitor	protein binding|ribonuclease inhibitor activity|	cytoplasm|angiogenin-PRI complex|extracellular exosome|	1	0	1	0	0	0	0	1	0	0	Known	polyA	polyA	3.214	Moderate	LRR_RI_capping	LRR_6	LRR_6	N/A	N/A	N/A	N/A	N/A
O95696	Brd1	Bromodomain-containing protein 1	zinc ion binding|histone binding|	nucleus|nucleoplasm|dendrite|perikaryon|MOZ/MORF histone acetyltransferase complex|	0	0	0	0	0	0	0	0	0	0	Orphan	Non-polyA	N/A	3.21467	Moderate	EPL1	PHD_2	zf-HC5HC2H_2	Bromodomain	PWWP	N/A	N/A	N/A
Q8NDF8	Papd5	Non-canonical poly(A) RNA polymerase PAPD5	DNA binding|DNA-directed DNA polymerase activity|polynucleotide adenylyltransferase activity|poly(A) RNA binding|metal ion binding|	nucleolus|cytoplasm|	0	1	1	1	0	0	0	0	1	0	Known	polyA	polyA	3.21933	Moderate	NTP_transf_2	PAP_assoc	N/A	N/A	N/A	N/A	N/A	N/A
Q15047	Setdb1	Histone-lysine N-methyltransferase SETDB1	DNA binding|protein binding|zinc ion binding|histone-lysine N-methyltransferase activity|	nuclear chromatin|nucleus|nucleoplasm|cytoplasm|plasma membrane|intracellular membrane-bounded organelle|	1	0	0	0	0	0	0	0	0	0	Known	Non-polyA	N/A	3.22033	Moderate	DUF5604	TUDOR_5	Tudor_4	MBD	Pre-SET	SET	N/A	N/A
O95163	Ikbkap	Elongator complex protein 1	signal transducer activity|protein binding|phosphorylase kinase regulator activity|RNA polymerase II core binding|	histone acetyltransferase complex|nucleolus|cytoplasm|transcription elongation factor complex|Elongator holoenzyme complex|	1	0	1	0	0	0	0	0	0	0	Known	Non-polyA	N/A	3.22267	Moderate	IKI3	N/A	N/A	N/A	N/A	N/A	N/A	N/A
Q13315	Atm	Serine-protein kinase ATM	DNA binding|protein serine/threonine kinase activity|DNA-dependent protein kinase activity|protein binding|ATP binding|1-phosphatidylinositol-3-kinase activity|protein complex binding|histone serine kinase activity|protein dimerization activity|protein N-terminus binding|	nucleoplasm|spindle|cytoplasmic membrane-bounded vesicle|chromosome, telomeric region|	1	0	0	0	0	0	0	0	0	0	Known	Non-polyA	N/A	3.22333	Moderate	TAN	FAT	PI3_PI4_kinase	FATC	N/A	N/A	N/A	N/A
Q9ULJ3	Zbtb21	Zinc finger and BTB domain-containing protein 21	RNA polymerase II regulatory region sequence-specific DNA binding|protein binding|methyl-CpG binding|metal ion binding|sequence-specific DNA binding RNA polymerase II transcription factor activity|	nucleus|	0	0	0	0	0	0	0	0	0	0	Orphan	Non-polyA	N/A	3.22567	Moderate	BTB	zf-C2H2*2	zf_C2H2_6	N/A	N/A	N/A	N/A	N/A
Q13838	Ddx39b	Spliceosome RNA helicase DDX39B	ATP-dependent RNA helicase activity|protein binding|ATP binding|RNA-dependent ATPase activity|U6 snRNA binding|U4 snRNA binding|ATP-dependent protein binding|poly(A) RNA binding|	transcription export complex|nucleus|nucleoplasm|spliceosomal complex|nuclear speck|U4 snRNP|U6 snRNP|cytoplasm|	1	0	1	0	0	1	1	0	0	1	Known	polyA	polyA	3.22767	Moderate	DEAD	Helicase_C	N/A	N/A	N/A	N/A	N/A	N/A
Q6DCA0	AMMECR1L	AMMECR1-like protein	N/A	N/A	0	0	0	0	0	0	0	0	0	0	Orphan	Non-polyA	N/A	3.22767	Moderate	AMMECR1	N/A	N/A	N/A	N/A	N/A	N/A	N/A
P20700	Lmnb1	Lamin-B1	structural molecule activity|phospholipase binding|	nuclear envelope|nuclear inner membrane|lamin filament|nucleoplasm|membrane|nuclear matrix|nuclear membrane|	1	0	1	0	0	0	0	0	0	0	Known	Non-polyA	N/A	3.22833	Moderate	Filament	LTD	N/A	N/A	N/A	N/A	N/A	N/A
P46940	Iqgap1	Ras GTPase-activating-like protein IQGAP1	GTPase inhibitor activity|GTPase activator activity|calcium ion binding|protein binding|calmodulin binding|phosphatidylinositol-3,4,5-trisphosphate binding|protein kinase binding|protein phosphatase binding|protein domain specific binding|protein complex binding|protein serine/threonine kinase activator activity|S100 protein binding|Rac GTPase binding|	ruffle|nucleoplasm|cytoplasm|cytosol|microtubule|actin filament|plasma membrane|focal adhesion|lateral plasma membrane|cell junction|axon|growth cone|midbody|extrinsic component of cytoplasmic side of plasma membrane|slit diaphragm|cytoplasmic ribonucleoprotein granule|neuron projection|extracellular exosome|actin cytoskeleton|microtubule cytoskeleton|	1	0	0	0	1	0	0	0	0	1	Known	polyA	polyA	3.232	Moderate	CH	IQ*4	RasGAP	RasGAP_C	N/A	N/A	N/A	N/A
P58317	Znf121	Zinc finger protein 121	DNA binding|sequence-specific DNA binding transcription factor activity|metal ion binding|	nucleus|	0	0	0	0	0	0	0	0	0	0	Orphan	Non-polyA	N/A	3.23233	Moderate	zf-C2H2*9	N/A	N/A	N/A	N/A	N/A	N/A	N/A
Q14204	Dync1h1	Cytoplasmic dynein 1 heavy chain 1	microtubule motor activity|protein binding|ATP binding|ATPase activity|poly(A) RNA binding|dynein light intermediate chain binding|	centrosome|cytosol|cytoplasmic dynein complex|microtubule|membrane|filopodium|extracellular exosome|	1	0	1	1	1	0	0	0	1	0	Known	polyA	polyA	3.23267	Moderate	DHC_N1	DHC_N2	AAA_6	AAA_5	AAA_7	AAA_8	MT	AAA_9
Q13642-1	Fhl1	Isoform 1 of Four and a half LIM domains protein 1	protein binding|zinc ion binding|ion channel binding|	nucleus|cytoplasm|cytosol|plasma membrane|focal adhesion|	1	0	0	0	0	0	0	0	0	0	Known	Non-polyA	N/A	3.23333	Moderate	LIM*3	N/A	N/A	N/A	N/A	N/A	N/A	N/A
Q96DI7	Snrnp40	U5 small nuclear ribonucleoprotein 40 kDa protein	protein binding|poly(A) RNA binding|	nucleoplasm|U5 snRNP|small nucleolar ribonucleoprotein complex|cytoplasm|catalytic step 2 spliceosome|	0	0	1	0	0	0	0	0	1	0	Known	polyA	polyA	3.23467	Moderate	WD40*7	N/A	N/A	N/A	N/A	N/A	N/A	N/A
Q16531	Ddb1	DNA damage-binding protein 1	DNA binding|protein binding|damaged DNA binding|	extracellular space|nucleus|nucleoplasm|cytoplasm|Cul4A-RING E3 ubiquitin ligase complex|Cul4B-RING E3 ubiquitin ligase complex|extracellular exosome|Cul4-RING E3 ubiquitin ligase complex|	1	0	1	0	0	0	0	0	0	0	Known	Non-polyA	N/A	3.23533	Moderate	MMS1_N	CPSF_A	N/A	N/A	N/A	N/A	N/A	N/A
Q8IUF8	Mina	Ribosomal oxygenase 2	RNA polymerase II transcription factor binding transcription repressor activity|metal ion binding|dioxygenase activity|	nucleus|transcription factor complex|nucleolus|cytoplasm|cytosol|	0	0	0	0	0	0	0	0	0	0	Orphan	Non-polyA	N/A	3.236	Moderate	Cupin_4	N/A	N/A	N/A	N/A	N/A	N/A	N/A
Q15154	Pcm1	Pericentriolar material 1 protein	protein binding|identical protein binding|	pericentriolar material|cytoplasm|centrosome|cytosol|membrane|nuclear membrane|centriolar satellite|ciliary basal body|protein complex|nonmotile primary cilium|centrosome|	1	0	1	0	0	0	0	0	0	0	Known	Non-polyA	N/A	3.238	Moderate	PCM1_C	N/A	N/A	N/A	N/A	N/A	N/A	N/A
Q14974	Kpnb1	Importin subunit beta-1	protein binding|nuclear localization sequence binding|zinc ion binding|Ran GTPase binding|protein transporter activity|enzyme binding|protein domain specific binding|poly(A) RNA binding|	nuclear envelope|nuclear pore|nucleoplasm|cytoplasm|cytosol|membrane|nuclear membrane|extracellular exosome|endoplasmic reticulum tubular network|	1	0	1	1	1	0	0	0	0	0	Known	polyA	polyA	3.23933	Moderate	IBN_N	N/A	N/A	N/A	N/A	N/A	N/A	N/A
E9PHM2	Lars2	Probable leucine--tRNA ligase, mitochondrial	aminoacyl-tRNA editing activity|leucine-tRNA ligase activity|ATP binding|	mitochondrion|cytosol|	0	0	0	0	0	0	0	0	0	0	Orphan	Non-polyA	N/A	3.23933	Moderate	tRNA-synt_1	tRNA-synt_1	tRNA-synt_1	Anticodon_1	N/A	N/A	N/A	N/A
Q6ZRQ5	Mms22l	Protein MMS22-like	protein binding|	nucleoplasm|nuclear replication fork|FACT complex|MCM complex|	0	0	0	0	0	0	0	0	0	0	Orphan	Non-polyA	N/A	3.24033	Moderate	MMS22L_N	MMS22L_C	N/A	N/A	N/A	N/A	N/A	N/A
Q96GC5	Mrpl48	39S ribosomal protein L48, mitochondrial	protein binding|	mitochondrial inner membrane|mitochondrial ribosome|	0	0	1	0	0	0	0	0	0	0	Known	Non-polyA	N/A	3.24067	Moderate	Ribosomal_S10	N/A	N/A	N/A	N/A	N/A	N/A	N/A
Q9Y5T5	Usp16	Ubiquitin carboxyl-terminal hydrolase 16	transcription coactivator activity|cysteine-type endopeptidase activity|ubiquitin-specific protease activity|zinc ion binding|histone binding|ubiquitin binding|	nucleus|cytoplasm|	0	0	0	0	0	0	0	0	0	0	Orphan	Non-polyA	N/A	3.24167	Moderate	zf-UBP	UCH	N/A	N/A	N/A	N/A	N/A	N/A
Q9NZB2	Fam120a	Constitutive coactivator of PPAR-gamma-like protein 1	poly(A) RNA binding|	cytoplasm|plasma membrane|membrane|	1	1	1	1	1	1	1	1	1	1	Known	polyA	polyA	3.24333	Moderate	N/A	N/A	N/A	N/A	N/A	N/A	N/A	N/A
F5H5D3	Tuba1c	Tubulin alpha chain	GTPase activity|structural constituent of cytoskeleton|GTP binding|	cytoplasm|microtubule|	1	0	1	0	0	0	0	0	0	0	Known	Non-polyA	N/A	3.24367	Moderate	Tubulin	Tubulin C	N/A	N/A	N/A	N/A	N/A	N/A
P61326	Magoh	Protein mago nashi homolog	protein binding|poly(A) RNA binding|	nucleus|nucleoplasm|cytosol|nuclear speck|exon-exon junction complex|catalytic step 2 spliceosome|	0	0	0	1	0	1	0	0	0	0	Known	polyA	polyA	3.24433	Moderate	Mago_nashi	N/A	N/A	N/A	N/A	N/A	N/A	N/A
Q01968-2	Ocrl	Isoform B of Inositol polyphosphate 5-phosphatase OCRL-1	phosphatidylinositol-4,5-bisphosphate 5-phosphatase activity|GTPase activator activity|protein binding|Rac GTPase binding|inositol phosphate phosphatase activity|	photoreceptor outer segment|nucleus|cytoplasm|early endosome|Golgi stack|Golgi-associated vesicle|trans-Golgi network|cytosol|plasma membrane|coated pit|clathrin-coated vesicle|phagocytic vesicle membrane|early endosome membrane|extracellular exosome|	1	0	0	0	0	0	0	0	0	0	Known	Non-polyA	N/A	3.248	Moderate	OCRL_clath_bd	Exo_endo_phos	RhoGAP	N/A	N/A	N/A	N/A	N/A
A6NFI3	Znf316	Zinc finger protein 316	DNA binding|metal ion binding|	nucleus|	0	0	0	0	0	0	0	0	0	0	Orphan	Non-polyA	N/A	3.24833	Moderate	KRAB	zf-C2H2*13	N/A	N/A	N/A	N/A	N/A	N/A
Q8TCS8	Pnpt1	Polyribonucleotide nucleotidyltransferase 1, mitochondrial	3'-5'-exoribonuclease activity|polyribonucleotide nucleotidyltransferase activity|protein binding|poly(U) RNA binding|poly(G) binding|miRNA binding|poly(A) RNA binding|	cytoplasm|mitochondrion|mitochondrial intermembrane space|membrane|mitochondrial degradosome|	0	0	1	1	0	1	0	0	0	0	Known	polyA	polyA	3.24933	Moderate	RNase_PH	RNase_PH_C	RNPase	RNase_PH	KH_1	S1	N/A	N/A
Q9P0U3	Senp1	Sentrin-specific protease 1	endopeptidase activity|protein binding|SUMO-specific protease activity|	nucleus|nucleoplasm|cytoplasm|focal adhesion|nuclear membrane|	0	0	0	0	0	0	0	0	0	0	Orphan	Non-polyA	N/A	3.252	Moderate	Peptidase_C48	N/A	N/A	N/A	N/A	N/A	N/A	N/A
M0R210	Rps16	40S ribosomal protein S16	structural constituent of ribosome|	ribosome|	1	1	1	1	1	1	0	1	0	1	Known	polyA	polyA	3.25267	Moderate	Ribosomal_S9	N/A	N/A	N/A	N/A	N/A	N/A	N/A
O95453	Parn	Poly(A)-specific ribonuclease PARN	nucleotide binding|mRNA 3'-UTR binding|nuclease activity|poly(A)-specific ribonuclease activity|protein binding|protein kinase binding|poly(A) RNA binding|metal ion binding|	nucleus|nucleolus|cytoplasm|cytosol|	0	0	1	0	0	1	0	0	1	0	Known	polyA	polyA	3.25267	Moderate	CAF1	R3H	RNA bind	N/A	N/A	N/A	N/A	N/A
Q96M89	CCDC138	Coiled-coil domain-containing protein 138	N/A	N/A	0	0	0	0	0	0	0	0	0	0	Orphan	Non-polyA	N/A	3.25533	Moderate	N/A	N/A	N/A	N/A	N/A	N/A	N/A	N/A
Q63HN8	Rnf213	E3 ubiquitin-protein ligase RNF213	ubiquitin-protein transferase activity|protein binding|zinc ion binding|ligase activity|ATPase activity|	nucleolus|cytoplasm|membrane|	1	0	0	0	0	0	0	0	0	0	Known	Non-polyA	N/A	3.25533	Moderate	zf-C3HC4	N/A	N/A	N/A	N/A	N/A	N/A	N/A
Q8IYB8	Supv3l1	ATP-dependent RNA helicase SUPV3L1, mitochondrial	DNA binding|DNA helicase activity|RNA binding|double-stranded RNA binding|ATP-dependent RNA helicase activity|helicase activity|protein binding|ATP binding|3'-5' RNA helicase activity|protein homodimerization activity|poly(A) RNA binding|	nucleus|mitochondrion|mitochondrial matrix|mitochondrial nucleoid|mitochondrial degradosome|	0	1	1	1	0	1	1	0	1	0	Known	polyA	polyA	3.25567	Moderate	Suv3_N	Helicase C	Suv3_C_1	Suv3_C	N/A	N/A	N/A	N/A
Q96ME7	Znf512	Zinc finger protein 512	DNA binding|metal ion binding|	nucleus|nucleoplasm|	0	0	0	0	0	0	0	0	0	0	Orphan	Non-polyA	N/A	3.256	Moderate	zf-C2H2	N/A	N/A	N/A	N/A	N/A	N/A	N/A
P21333	Flna	Filamin-A	glycoprotein binding|signal transducer activity|protein kinase C binding|protein binding|transcription factor binding|Rho GTPase binding|Ral GTPase binding|small GTPase binding|mu-type opioid receptor binding|Fc-gamma receptor I complex binding|protein homodimerization activity|poly(A) RNA binding|SMAD binding|Rac GTPase binding|actin filament binding|	extracellular region|nucleus|nucleolus|cytoplasm|trans-Golgi network|cytosol|actin filament|plasma membrane|focal adhesion|actin cytoskeleton|membrane|cortical cytoskeleton|Myb complex|actin filament bundle|neuronal cell body|dendritic shaft|perinuclear region of cytoplasm|extracellular exosome|apical dendrite|	1	1	1	1	0	0	0	1	1	1	Known	polyA	polyA	3.25633	Moderate	CH	CH	filamin*23	N/A	N/A	N/A	N/A	N/A
Q01780	Exosc10	Exosome component 10	nucleotide binding|exoribonuclease activity|protein binding|3'-5' exonuclease activity|poly(A) RNA binding|	nuclear exosome (RNase complex)|exosome (RNase complex)|nucleus|nucleoplasm|nucleolus|cytoplasm|membrane|transcriptionally active chromatin|	1	1	1	1	0	1	1	0	1	0	Known	polyA	polyA	3.25667	Moderate	PMC2NT	DNA_pol_A_exo1	HRDC	N/A	N/A	N/A	N/A	N/A
Q13395	Tarbp1	Probable methyltransferase TARBP1	RNA binding|RNA methyltransferase activity|	nucleus|	1	0	0	0	0	0	0	0	0	0	Known	Non-polyA	viral RNA	3.25867	Moderate	SpoU_methylase	N/A	N/A	N/A	N/A	N/A	N/A	N/A
E7EQZ4	Smn1	Survival motor neuron protein	RNA binding|	spliceosomal complex|cytoplasm|	0	0	0	0	0	1	0	0	0	0	Known	Non-polyA	pre-mRNA (Lotti F., et al. Cell. 2012.)	3.25933	Moderate	SMN	N/A	N/A	N/A	N/A	N/A	N/A	N/A
Q7L576	Cyfip1	Cytoplasmic FMR1-interacting protein 1	protein binding|protein complex binding|Rac GTPase binding|actin filament binding|Rac GTPase binding|	ruffle|cytosol|mRNA cap binding complex|focal adhesion|lamellipodium|SCAR complex|neuron projection|synapse|perinuclear region of cytoplasm|extracellular exosome|	1	0	1	0	0	1	0	0	0	0	Known	Non-polyA	mRNA (Rubeis S.D.,et al. Neuron.2013.)	3.26167	Moderate	DUF1394	FragX_IP	N/A	N/A	N/A	N/A	N/A	N/A
Q6VMQ6	Atf7ip	Activating transcription factor 7-interacting protein 1	transcription corepressor activity|protein binding|ATPase activity|	nucleus|nucleoplasm|transcription factor complex|cytoplasm|	1	0	0	0	0	0	0	0	0	0	Known	Non-polyA	N/A	3.262	Moderate	Fn3_4	ATF7IP_BD	N/A	N/A	N/A	N/A	N/A	N/A
C9IZ01	Gfm1	Elongation factor G, mitochondrial	translation elongation factor activity|GTPase activity|GTP binding|	intracellular|	0	0	0	0	0	1	0	0	1	0	Known	polyA	polyA	3.264	Moderate	GTP_EFTU	GTP_EFTU_D2	EFG_II	EFG_IV	N/A	N/A	N/A	N/A
P36969	Gpx4	Phospholipid hydroperoxide glutathione peroxidase, mitochondrial	glutathione peroxidase activity|phospholipid-hydroperoxide glutathione peroxidase activity|	nucleus|nuclear envelope|mitochondrion|mitochondrial inner membrane|cytosol|extracellular exosome|	0	0	0	0	0	0	0	0	0	0	Orphan	Non-polyA	N/A	3.26433	Moderate	GSHPx	N/A	N/A	N/A	N/A	N/A	N/A	N/A
Q9Y3T9	Noc2l	Nucleolar complex protein 2 homolog	chromatin binding|transcription corepressor activity|protein binding|nucleosome binding|histone binding|poly(A) RNA binding|repressing transcription factor binding|	nucleus|nucleoplasm|nucleolus|	1	1	1	1	1	0	0	0	1	0	Known	polyA	polyA	3.26467	Moderate	Noc2	N/A	N/A	N/A	N/A	N/A	N/A	N/A
F5H1D6	Pole	DNA polymerase epsilon catalytic subunit A	nucleotide binding|DNA binding|DNA-directed DNA polymerase activity|zinc ion binding|3'-5' exonuclease activity|	nucleoplasm|cytoplasm|plasma membrane|epsilon DNA polymerase complex|	0	0	0	0	0	0	0	0	0	0	Orphan	Non-polyA	N/A	3.265	Moderate	DNA_pol_B_exo1	DNA_pol_B	DUF1744	N/A	N/A	N/A	N/A	N/A
P26640	Vars	Valine--tRNA ligase	aminoacyl-tRNA editing activity|valine-tRNA ligase activity|protein binding|ATP binding|	mitochondrion|cytosol|cytosol|	1	0	1	0	1	0	0	0	0	0	Known	Non-polyA	tRNA	3.266	Moderate	GST_C	tRNA-synt_1	Anticodon_1	N/A	N/A	N/A	N/A	N/A
P15170-2	Gspt1	Isoform 2 of Eukaryotic peptide chain release factor GTP-binding subunit ERF3A	translation release factor activity|GTPase activity|protein binding|GTP binding|poly(A) RNA binding|	intracellular|	1	0	0	1	0	1	0	1	1	0	Known	polyA	polyA	3.26633	Moderate	GTP_EFTU	GTP_EFTU_D2	GTP_EFTU_D3	N/A	N/A	N/A	N/A	N/A
Q9NVI1	Fanci	Fanconi anemia group I protein	DNA binding|protein binding|DNA polymerase binding|	nucleus|nucleoplasm|cytoplasm|plasma membrane|membrane|	1	0	1	0	0	0	0	0	0	0	Known	Non-polyA	ssRNA (Liang Z., et al. Cell Rep. 2019.)	3.268	Moderate	FANCI_S1-cap	FANCI_S1-4	FANCI_HD1-2	N/A	N/A	N/A	N/A	N/A
O43776	Nars	Asparagine--tRNA ligase, cytoplasmic	nucleic acid binding|asparagine-tRNA ligase activity|ATP binding|	cytoplasm|mitochondrion|cytosol|extracellular exosome|	1	0	1	0	1	0	0	0	0	0	Known	Non-polyA	tRNA	3.26867	Moderate	tRNA_anti-codon	tRNA-synt_2	N/A	N/A	N/A	N/A	N/A	N/A
O95347	Smc2	Structural maintenance of chromosomes protein 2	protein binding|ATP binding|protein heterodimerization activity|	nuclear chromosome|condensed chromosome|condensin complex|nucleus|nucleoplasm|cytoplasm|cytosol|extracellular exosome|	1	0	1	0	0	0	0	0	0	0	Known	Non-polyA	N/A	3.27033	Moderate	SMC_N*2	SMC_hinge	N/A	N/A	N/A	N/A	N/A	N/A
Q9ULC4	Mcts1	Malignant T-cell-amplified sequence 1	translation initiation factor activity|	cytoplasm|plasma membrane|cytosolic small ribosomal subunit|	0	0	0	0	0	1	0	0	0	0	Known	Non-polyA	tRNA (Ahmed Y.L. Plos Biol. 2018.)	3.27067	Moderate	Pre-PUA	PUA	N/A	N/A	N/A	N/A	N/A	N/A
Q9NWT1	Pak1ip1	p21-activated protein kinase-interacting protein 1	protein binding|	nucleoplasm|nucleolus|plasma membrane|	0	0	1	0	0	0	0	0	0	0	Known	Non-polyA	N/A	3.272	Moderate	WD40	WD40	WD40	N/A	N/A	N/A	N/A	N/A
P49588	Aars	Alanine--tRNA ligase, cytoplasmic	tRNA binding|aminoacyl-tRNA editing activity|alanine-tRNA ligase activity|ATP binding|zinc ion binding|	cytoplasm|cytosol|membrane|extracellular exosome|	1	0	0	0	1	1	0	0	0	0	Known	Non-polyA	tRNA (Sun L., et al. J. Am. Chem. Soc. 2016.)	3.272	Moderate	tRNA-synt_2c	tRNA_SAD	DHHA1	N/A	N/A	N/A	N/A	N/A
P50990	Cct8	T-complex protein 1 subunit theta	protein binding|ATP binding|ATPase activity, coupled|unfolded protein binding|	zona pellucida receptor complex|cytoplasm|centrosome|cytosol|chaperonin-containing T-complex|microtubule|aggresome|cell body|intermediate filament cytoskeleton|extracellular exosome|	1	0	1	0	0	0	0	0	0	0	Known	Non-polyA	N/A	3.274	Moderate	Cpn60_TCP1	N/A	N/A	N/A	N/A	N/A	N/A	N/A
Q8IZT6	Aspm	Abnormal spindle-like microcephaly-associated protein	calmodulin binding|	nucleus|cytoplasm|midbody|microtubule minus-end|meiotic spindle|mitotic spindle pole|	0	0	1	0	0	0	0	0	0	0	Known	Non-polyA	N/A	3.27467	Moderate	ASH	CH	IQ*40	N/A	N/A	N/A	N/A	N/A
Q9P2J5	Lars	Leucine--tRNA ligase, cytoplasmic	aminoacyl-tRNA editing activity|leucine-tRNA ligase activity|protein binding|ATP binding|methionine-tRNA ligase activity|	nucleus|cytoplasm|cytosol|	1	0	0	0	1	0	0	0	0	0	Known	Non-polyA	tRNA (Gerstberger, S., et al. Nat. Rev. Genetics. 2014. )	3.276	Moderate	tRNA-synt_1*2	Anticodon_1	N/A	N/A	N/A	N/A	N/A	N/A
Q8WXH0	Syne2	Nesprin-2	actin binding|protein binding|actin filament binding|	nucleus|nuclear envelope|nuclear outer membrane|nucleoplasm|cytoplasm|mitochondrion|focal adhesion|integral component of membrane|aggresome|sarcoplasmic reticulum|Z disc|lamellipodium membrane|filopodium membrane|nuclear membrane|nuclear lumen|sarcoplasmic reticulum membrane|LINC complex|intermediate filament cytoskeleton|extracellular exosome|	1	0	1	0	0	0	0	0	0	0	Known	Non-polyA	N/A	3.27933	Moderate	CH	CH	Spectrin	Spectrin	Spectrin	KASH	N/A	N/A
O15294	Ogt	UDP-N-acetylglucosamine--peptide N-acetylglucosaminyltransferase 110 kDa subunit	protein binding|phosphatidylinositol-3,4,5-trisphosphate binding|enzyme activator activity|acetylglucosaminyltransferase activity|protein N-acetylglucosaminyltransferase activity|protein O-GlcNAc transferase activity|histone acetyltransferase activity (H4-K5 specific)|histone acetyltransferase activity (H4-K8 specific)|histone acetyltransferase activity (H4-K16 specific)|	histone acetyltransferase complex|nucleus|nucleoplasm|cytoplasm|mitochondrion|microtubule organizing center|cytosol|plasma membrane|MLL5-L complex|	0	0	0	0	0	0	0	0	0	0	Orphan	Non-polyA	N/A	3.28033	Moderate	TPR11*4	TPR8*2	TPR1	TPR16	N/A	N/A	N/A	N/A
O94901-9	Sun1	Isoform 9 of SUN domain-containing protein 1	protein binding|lamin binding|protein anchor|	acrosomal membrane|nuclear envelope|integral component of nuclear inner membrane|nuclear membrane|LINC complex|intracellular membrane-bounded organelle|	1	0	0	0	0	0	0	0	0	0	Known	Non-polyA	mRNA (Li P., et al. Sci. Rep. 2017.)	3.282	Moderate	N/A	N/A	N/A	N/A	N/A	N/A	N/A	N/A
Q9Y3A5	Sbds	Ribosome maturation protein SBDS	protein binding|microtubule binding|rRNA binding|ribosome binding|poly(A) RNA binding|	spindle pole|nucleus|nucleoplasm|nucleolus|cytoplasm|	0	0	1	0	0	1	0	0	1	0	Known	polyA	polyA	3.28933	Moderate	SBDS	SBDS C	N/A	N/A	N/A	N/A	N/A	N/A
G5E9D5	Elac2	ElaC homolog 2 (E. coli), isoform CRA_a	3'-tRNA processing endoribonuclease activity|	nucleoplasm|	1	0	1	1	0	0	0	1	1	0	Known	polyA	polyA	3.28933	Moderate	Lactamase_B_4	Lactamase_B_2	N/A	N/A	N/A	N/A	N/A	N/A
P61956	Sumo2	Small ubiquitin-related modifier 2	protein binding|SUMO transferase activity|ubiquitin protein ligase binding|poly(A) RNA binding|	nucleus|nucleoplasm|PML body|	1	1	0	1	0	0	1	0	0	0	Known	polyA	polyA	3.28967	Moderate	Rad60-SLD	N/A	N/A	N/A	N/A	N/A	N/A	N/A
P49327	Fasn	Fatty acid synthase	fatty acid synthase activity|[acyl-carrier-protein] S-acetyltransferase activity|[acyl-carrier-protein] S-malonyltransferase activity|3-oxoacyl-[acyl-carrier-protein] synthase activity|3-oxoacyl-[acyl-carrier-protein] reductase (NADPH) activity|3-hydroxypalmitoyl-[acyl-carrier-protein] dehydratase activity|enoyl-[acyl-carrier-protein] reductase (NADPH, B-specific) activity|oleoyl-[acyl-carrier-pr…	cytoplasm|mitochondrion|Golgi apparatus|cytosol|plasma membrane|membrane|melanosome|glycogen granule|extracellular exosome|	1	1	1	1	0	0	0	0	1	1	Known	polyA	polyA	3.292	Moderate	ketoacyl-synt	ketoacyl-synt C	Acyl_transf_1	KAsynt_C_assoc	PS-DH	Methyltransf_12	ADH_zinc_N	KR
O14578-4	Cit	Isoform 4 of Citron Rho-interacting kinase	protein serine/threonine kinase activity|protein binding|ATP binding|SH3 domain binding|PDZ domain binding|metal ion binding|scaffold protein binding|	ruffle|vacuole|cytosol|actin cytoskeleton|membrane|	1	0	0	0	0	0	0	0	0	0	Known	Non-polyA	N/A	3.29767	Moderate	Pkinase	PH	CNH	N/A	N/A	N/A	N/A	N/A
P38398	Brca1	Breast cancer type 1 susceptibility protein	DNA binding|damaged DNA binding|transcription coactivator activity|RNA binding|ubiquitin-protein transferase activity|protein binding|zinc ion binding|tubulin binding|ligase activity|enzyme binding|ubiquitin protein ligase binding|transcription regulatory region DNA binding|androgen receptor binding|	ubiquitin ligase complex|condensed nuclear chromosome|nucleus|nucleoplasm|chromosome|cytoplasm|plasma membrane|gamma-tubulin ring complex|ribonucleoprotein complex|BRCA1-BARD1 complex|protein complex|BRCA1-A complex|	0	0	0	0	0	1	0	0	0	0	Known	Non-polyA	ncRNA (Gerstberger, S., et al. Nat. Rev. Genetics. 2014. )	3.299	Moderate	zf-C3HC4	BRCT_assoc	BRCT*2	N/A	N/A	N/A	N/A	N/A
Q9UBL3	Ash2l	Set1/Ash2 histone methyltransferase complex subunit ASH2	DNA binding|protein binding|transcription regulatory region DNA binding|metal ion binding|euchromatin binding|histone methyltransferase activity (H3-K4 specific)|	nucleus|nucleoplasm|nuclear euchromatin|histone methyltransferase complex|Set1C/COMPASS complex|	0	0	0	0	0	0	0	0	0	0	Orphan	Non-polyA	N/A	3.29967	Moderate	SPRY	N/A	N/A	N/A	N/A	N/A	N/A	N/A
P33992	Mcm5	DNA replication licensing factor MCM5	DNA helicase activity|chromatin binding|DNA replication origin binding|protein binding|ATP binding|	nucleus|nucleoplasm|membrane|MCM complex|	1	0	1	0	1	0	0	0	0	0	Known	Non-polyA	N/A	3.30067	Moderate	MCM_N	MCM_OB	MCM	N/A	N/A	N/A	N/A	N/A
Q12789	Gtf3c1	General transcription factor 3C polypeptide 1	protein binding|DNA binding|	transcription factor TFIIIC complex|nucleus|nucleoplasm|nucleolus|membrane|ribonucleoprotein complex|	1	0	1	0	0	0	0	0	0	0	Known	Non-polyA	rRNA (Lagna G,.,)	3.302	Moderate	B-block_TFIIIC	N/A	N/A	N/A	N/A	N/A	N/A	N/A
P42858	Htt	Huntingtin	p53 binding|receptor binding|protein binding|profilin binding|transcription factor binding|dynactin binding|identical protein binding|ion channel binding|dynein intermediate chain binding|beta-tubulin binding|diazepam binding|	nucleus|nucleoplasm|cytoplasm|mitochondrion|late endosome|autophagosome|endoplasmic reticulum|Golgi apparatus|centriole|cytosol|postsynaptic density|inclusion body|clathrin-coated vesicle|axon|dendrite|cytoplasmic vesicle membrane|neuronal cell body|protein complex|neuronal ribonucleoprotein granule|	1	0	0	0	0	0	0	0	0	0	Known	Non-polyA	N/A	3.30267	Moderate	DUF3652	N/A	N/A	N/A	N/A	N/A	N/A	N/A
Q70CQ2	Usp34	Ubiquitin carboxyl-terminal hydrolase 34	cysteine-type endopeptidase activity|ubiquitin-specific protease activity|protein binding|	nucleus|cytoplasm|cytosol|	1	0	0	0	0	0	0	0	0	0	Known	Non-polyA	N/A	3.30267	Moderate	UCH	DUF3517	N/A	N/A	N/A	N/A	N/A	N/A
P52948	Nup98	Nuclear pore complex protein Nup98-Nup96	transporter activity|protein binding|structural constituent of nuclear pore|peptide binding|	nuclear envelope|nuclear pore|nucleoplasm|cytosol|nuclear pore outer ring|nuclear membrane|nuclear periphery|nuclear inclusion body|nuclear pore nuclear basket|kinetochore|	1	0	0	0	0	1	0	0	0	0	Known	Non-polyA	mRNA (Iwamoto M., et al. Genes to Cells. 2010.)	3.30533	Moderate	Nucleoporin2	Nup96	N/A	N/A	N/A	N/A	N/A	N/A
E9PF10	Nup155	Nuclear pore complex protein Nup155	structural constituent of nuclear pore|	nuclear pore|	0	0	0	0	0	0	0	0	0	0	Orphan	Non-polyA	N/A	3.30733	Moderate	Nucleoporin_N	Nucleoporin_C	N/A	N/A	N/A	N/A	N/A	N/A
Q8TD26	Chd6	Chromodomain-helicase-DNA-binding protein 6	transcription cofactor binding|DNA binding|ATP binding|ATP-dependent helicase activity|DNA-dependent ATPase activity|	nucleoplasm|DNA-directed RNA polymerase II, core complex|	0	0	0	0	0	0	0	0	0	0	Orphan	Non-polyA	N/A	3.30767	Moderate	Chromo*2	SNF2_N	Helicase C	N/A	N/A	N/A	N/A	N/A
P42285	Skiv2l2	Superkiller viralicidic activity 2-like 2	RNA helicase activity|protein binding|ATP binding|poly(A) RNA binding|	nucleus|nucleoplasm|nucleolus|catalytic step 2 spliceosome|exosome (RNase complex)|	1	1	1	0	0	0	1	0	1	1	Known	polyA	polyA	3.31	Moderate	DEAD	Helicase C	rRNA_proc-arch	DSHCT	N/A	N/A	N/A	N/A
P20585	Msh3	DNA mismatch repair protein Msh3	Y-form DNA binding|heteroduplex DNA loop binding|double-strand/single-strand DNA junction binding|protein binding|ATP binding|DNA-dependent ATPase activity|centromeric DNA binding|enzyme binding|guanine/thymine mispair binding|protein homodimerization activity|oxidized purine DNA binding|single-stranded DNA binding|mismatched DNA binding|dinucleotide insertion or deletion binding|single guanine i…	nuclear chromosome|nucleus|nucleoplasm|membrane|MutSbeta complex|	1	0	0	0	0	0	0	0	0	0	Known	Non-polyA	N/A	3.31167	Moderate	MutS_I	MutS_II	MutS_III	MutS_IV	N/A	N/A	N/A	N/A
Q9UKM9	Raly	RNA-binding protein Raly	nucleotide binding|RNA binding|protein binding|poly(A) RNA binding|	nucleus|catalytic step 2 spliceosome|	1	1	1	1	1	1	1	1	1	0	Known	polyA	polyA	3.31233	Moderate	RRM_1	N/A	N/A	N/A	N/A	N/A	N/A	N/A
Q13535	Atr	Serine/threonine-protein kinase ATR	DNA binding|protein kinase activity|protein serine/threonine kinase activity|protein binding|ATP binding|MutLalpha complex binding|MutSalpha complex binding|protein dimerization activity|	XY body|nucleoplasm|chromosome|Golgi apparatus|PML body|	1	0	0	0	0	0	0	0	0	0	Known	Non-polyA	N/A	3.31733	Moderate	UME	FAT	PI3_PI4_kinase	FATC	N/A	N/A	N/A	N/A
Q8N3U4	Stag2	Cohesin subunit SA-2	RNA polymerase II transcription regulatory region sequence-specific DNA binding transcription factor activity involved in positive regulation of transcription|chromatin binding|protein binding|	chromosome, centromeric region|chromatin|nucleus|nucleoplasm|chromosome|nucleolus|cytosol|plasma membrane|actin cytoskeleton|membrane|intermediate filament cytoskeleton|	0	0	1	0	0	0	0	0	0	0	Known	Non-polyA	N/A	3.31833	Moderate	STAG	N/A	N/A	N/A	N/A	N/A	N/A	N/A
Q02241	Kif23	Kinesin-like protein KIF23	microtubule motor activity|protein binding|ATP binding|microtubule binding|ATPase activity|	nucleus|nucleoplasm|centrosome|spindle|cytosol|kinesin complex|microtubule|focal adhesion|midbody|intercellular bridge|mitotic spindle|centralspindlin complex|	1	0	0	0	0	0	0	0	0	0	Known	Non-polyA	N/A	3.31833	Moderate	Kinesin	MKLP1_Arf_bdg	N/A	N/A	N/A	N/A	N/A	N/A
Q9NQH7	Xpnpep3	Probable Xaa-Pro aminopeptidase 3	aminopeptidase activity|metallopeptidase activity|manganese ion binding|	mitochondrion|extracellular exosome|	0	0	0	0	0	0	0	0	0	0	Orphan	Non-polyA	N/A	3.32167	Moderate	AMP_N	Peptidase_M24	N/A	N/A	N/A	N/A	N/A	N/A
Q9HB71	Cacybp	Calcyclin-binding protein	protein binding|protein homodimerization activity|	nuclear envelope lumen|nucleoplasm|cytoplasm|beta-catenin destruction complex|neuron projection|cell body|extracellular exosome|	1	0	1	0	1	0	0	0	0	0	Known	Non-polyA	N/A	3.32233	Moderate	Siah-Interact_N	CS	SGS	N/A	N/A	N/A	N/A	N/A
Q5SVZ6	Zmym1	Zinc finger MYM-type protein 1	nucleic acid binding|zinc ion binding|protein dimerization activity|	nucleus|	0	0	0	0	0	0	0	0	0	0	Orphan	Non-polyA	N/A	3.32267	Moderate	zf-FCS*2	DUF4371	Dimer_Tnp_hAT	N/A	N/A	N/A	N/A	N/A
O14980	Xpo1	Exportin-1	RNA binding|transporter activity|nucleocytoplasmic transporter activity|protein binding|Ran GTPase binding|protein transporter activity|protein domain specific binding|	kinetochore|nucleus|nuclear envelope|annulate lamellae|nucleoplasm|nucleolus|cytoplasm|cytosol|Cajal body|membrane|ribonucleoprotein complex|nuclear membrane|intracellular membrane-bounded organelle|	1	0	1	0	1	1	0	0	0	0	Known	Non-polyA	diverse (Sendino M., et al. Cancer Drug Resist. 2018.)	3.32567	Moderate	IBN_N	Xpo1	CRM1_C	N/A	N/A	N/A	N/A	N/A
Q13310-2	Pabpc4	Isoform 2 of Polyadenylate-binding protein 4	nucleotide binding|protein binding|poly(A) binding|poly(U) RNA binding|poly(A) RNA binding|poly(C) RNA binding|	nucleus|cytoplasm|cytoplasmic stress granule|ribonucleoprotein complex|	1	1	1	1	1	1	1	1	1	1	Known	polyA	polyA	3.326	Moderate	RRM 1*4	PABP	N/A	N/A	N/A	N/A	N/A	N/A
Q00688	Fkbp3	Peptidyl-prolyl cis-trans isomerase FKBP3	peptidyl-prolyl cis-trans isomerase activity|receptor activity|protein binding|FK506 binding|poly(A) RNA binding|	nucleus|cytoplasm|endoplasmic reticulum membrane|	1	1	1	0	0	0	0	1	1	0	Known	polyA	polyA	3.32733	Moderate	BTHB	FKBP_C	N/A	N/A	N/A	N/A	N/A	N/A
Q01831	Xpc	DNA repair protein complementing XP-C cells	heteroduplex DNA loop binding|bubble DNA binding|damaged DNA binding|single-stranded DNA binding|protein binding|	nucleotide-excision repair factor 2 complex|nucleus|nucleoplasm|nucleolus|cytoplasm|plasma membrane|extracellular exosome|XPC complex|	0	0	0	0	0	0	0	0	0	0	Orphan	Non-polyA	N/A	3.335	Moderate	Rad4	BHD_1	BHD_2	BHD_3	N/A	N/A	N/A	N/A
Q4G0J3	Larp7	La-related protein 7	nucleotide binding|protein binding|poly(A) RNA binding|	nucleus|nucleoplasm|cytoplasm|Golgi apparatus|ribonucleoprotein complex|	1	1	1	1	0	1	0	0	1	0	Known	polyA	polyA	3.33633	Moderate	La	RRM 1	RRM_3	N/A	N/A	N/A	N/A	N/A
Q6IQ32	Adnp2	Activity-dependent neuroprotector homeobox protein 2	DNA binding|protein binding|metal ion binding|	nucleus|	1	0	0	0	0	0	0	0	0	0	Known	Non-polyA	N/A	3.33967	Moderate	N/A	N/A	N/A	N/A	N/A	N/A	N/A	N/A
Q5VZL5	Zmym4	Zinc finger MYM-type protein 4	DNA binding|protein binding|zinc ion binding|	nucleus|nucleoplasm|nucleolus|cytoplasm|	1	0	0	0	0	0	0	0	0	0	Known	Non-polyA	N/A	3.34167	Moderate	zf-FCS*5	DUF3504	N/A	N/A	N/A	N/A	N/A	N/A
Q3L8U1	Chd9	Chromodomain-helicase-DNA-binding protein 9	DNA binding|helicase activity|protein binding|ATP binding|	nucleus|nucleoplasm|cytoplasm|plasma membrane|	0	0	0	0	0	0	0	0	0	0	Orphan	Non-polyA	N/A	3.34233	Moderate	Chromo*2	SNF2_N	Helicase_C	BRK*2	N/A	N/A	N/A	N/A
Q9Y285	Farsa	Phenylalanine--tRNA ligase alpha subunit	tRNA binding|phenylalanine-tRNA ligase activity|protein binding|ATP binding|poly(A) RNA binding|	cytoplasm|cytosol|phenylalanine-tRNA ligase complex|membrane|	1	1	1	1	0	1	0	0	0	1	Known	polyA	polyA	3.346	Moderate	PheRS_DBD1	PheRS_DBD2	PheRS_DBD3	tRNA-synt_2d	N/A	N/A	N/A	N/A
Q9UKA9-3	Ptbp2	Isoform 3 of Polypyrimidine tract-binding protein 2	nucleotide binding|mRNA binding|poly(A) RNA binding|	spliceosomal complex|	0	1	1	1	1	1	1	0	1	0	Known	polyA	polyA	3.34967	Moderate	N/A	N/A	N/A	N/A	N/A	N/A	N/A	N/A
Q9NYP9	Mis18a	Protein Mis18-alpha	protein binding|	chromosome, centromeric region|nucleus|nucleoplasm|cytoplasm|	0	0	0	0	0	0	0	0	0	0	Orphan	Non-polyA	N/A	3.352	Moderate	Yippee-Mis18	N/A	N/A	N/A	N/A	N/A	N/A	N/A
O60264	Smarca5	SWI/SNF-related matrix-associated actin-dependent regulator of chromatin subfamily A member 5	DNA binding|helicase activity|protein binding|ATP binding|ATPase activity|nucleosome binding|histone binding|	condensed chromosome|nucleus|nucleoplasm|chromatin silencing complex|nucleolus|NURF complex|RSF complex|nuclear replication fork|	1	0	0	0	0	0	0	0	0	1	Known	polyA	polyA	3.35233	Moderate	DBINO	SNF2_N	Helicase C	HAND	SLIDE	N/A	N/A	N/A
P13639	Eef2	Elongation factor 2	translation elongation factor activity|GTPase activity|protein binding|GTP binding|protein kinase binding|poly(A) RNA binding|	nucleus|cytoplasm|cytosol|polysome|plasma membrane|membrane|aggresome|ribonucleoprotein complex|extracellular exosome|	1	1	1	1	1	1	0	1	1	1	Known	polyA	polyA	3.353	Moderate	GTP_EFTU	GTP_EFTU_D2	EFG_II	EFG_IV	EFG_C	N/A	N/A	N/A
A0A0C4DGG9	Chd4	Chromodomain-helicase-DNA-binding protein 4	DNA binding|ATP binding|microtubule binding|ATP-dependent helicase activity|zinc ion binding|	NuRD complex|	0	0	0	0	0	0	0	0	0	1	Known	polyA	polyA	3.358	Moderate	CHDNT	PHD*2	Chromo	SNF2_N	DUF1087	Helicase_C	CHDCT2	DUF1086
Q9GZT3	Slirp	SRA stem-loop-interacting RNA-binding protein, mitochondrial	nucleotide binding|protein binding|poly(A) RNA binding|	acrosomal vesicle|nucleus|mitochondrion|ribonucleoprotein complex|sperm flagellum|perinuclear region of cytoplasm|	1	1	1	1	0	1	1	1	0	1	Known	polyA	polyA	3.35833	Moderate	RRM_1	N/A	N/A	N/A	N/A	N/A	N/A	N/A
Q8WUM0	Nup133	Nuclear pore complex protein Nup133	nucleocytoplasmic transporter activity|protein binding|	nuclear envelope|nuclear pore|cytosol|membrane|nuclear pore outer ring|nuclear membrane|condensed chromosome kinetochore|condensed chromosome outer kinetochore|	1	0	0	0	0	0	0	0	0	0	Known	Non-polyA	mRNA (Vasu S., et al. J. Cell. Biol. 2001.)	3.359	Moderate	Nucleoporin_C	N/A	N/A	N/A	N/A	N/A	N/A	N/A
P24928	Polr2a	DNA-directed RNA polymerase II subunit RPB1	DNA binding|DNA-directed RNA polymerase activity|RNA-directed RNA polymerase activity|protein binding|ubiquitin protein ligase binding|poly(A) RNA binding|metal ion binding|RNA polymerase II activity|protein binding|	nucleus|nucleoplasm|DNA-directed RNA polymerase II, core complex|nucleolus|Prp19 complex|	1	1	1	1	0	0	1	0	0	0	Known	polyA	polyA	3.35967	Moderate	RNA_pol_Rpb1_1-7	RNA_pol_Rpb1_R*29	N/A	N/A	N/A	N/A	N/A	N/A
Q9NW08	Polr3b	DNA-directed RNA polymerase III subunit RPC2	DNA binding|ribonucleoside binding|metal ion binding|RNA polymerase III activity|	nucleoplasm|DNA-directed RNA polymerase III complex|cytosol|	0	0	0	0	0	0	0	0	0	0	Orphan	Non-polyA	N/A	3.362	Moderate	RNA_pol_Rpb2_1-7	N/A	N/A	N/A	N/A	N/A	N/A	N/A
Q9NRN7	Aasdhppt	L-aminoadipate-semialdehyde dehydrogenase-phosphopantetheinyl transferase	magnesium ion binding|protein binding|holo-[acyl-carrier-protein] synthase activity|	cytosol|extracellular exosome|	1	0	0	0	0	0	0	0	0	0	Known	Non-polyA	N/A	3.363	Moderate	ACPS	N/A	N/A	N/A	N/A	N/A	N/A	N/A
Q9H4L7-2	Smarcad1	Isoform 2 of SWI/SNF-related matrix-associated actin-dependent regulator of chromatin subfamily A containing DEAD/H box 1	nucleic acid binding|DNA binding|helicase activity|protein binding|ATP binding|	heterochromatin|nucleoplasm|nuclear matrix|site of double-strand break|nuclear replication fork|	0	0	0	0	0	0	0	0	0	0	Orphan	Non-polyA	N/A	3.36333	Moderate	SNF2_N	Helicase C	N/A	N/A	N/A	N/A	N/A	N/A
Q9NVU7	Sdad1	Protein SDA1 homolog	0	nucleus|nucleolus|	0	1	1	0	0	0	0	0	0	1	Known	polyA	polyA	3.36967	Moderate	NUC130_3NT	SDA1*2	N/A	N/A	N/A	N/A	N/A	N/A
P30050	Rpl12	60S ribosomal protein L12	structural constituent of ribosome|protein binding|rRNA binding|poly(A) RNA binding|	cytosol|focal adhesion|membrane|cytosolic large ribosomal subunit|extracellular exosome|	1	1	1	1	1	1	0	1	0	1	Known	polyA	polyA	3.37133	Moderate	Ribosomal_L11_N	Ribosomal_L11	N/A	N/A	N/A	N/A	N/A	N/A
O95758	Ptbp3	Polypyrimidine tract-binding protein 3	nucleotide binding|RNA binding|poly(A) RNA binding|	nucleus|	1	1	1	0	1	1	1	1	0	1	Known	polyA	polyA	3.37133	Moderate	RRM_1	RRM_5*2	RRM_6	N/A	N/A	N/A	N/A	N/A
Q14149	Morc3	MORC family CW-type zinc finger protein 3	zinc ion binding|	nucleoplasm|PML body|intermediate filament cytoskeleton|	0	0	0	0	0	1	0	0	0	0	Known	Non-polyA	N/A	3.37333	Moderate	HATPase_c_3	Morc6_S5	zf-CW	N/A	N/A	N/A	N/A	N/A
P46063	Recql	ATP-dependent DNA helicase Q1	DNA binding|DNA helicase activity|ATP-dependent DNA helicase activity|protein binding|ATP binding|annealing helicase activity|ATP-dependent 3'-5' DNA helicase activity|	nucleus|nucleoplasm|membrane|	0	0	0	0	0	0	0	0	0	0	Orphan	Non-polyA	N/A	3.378	Moderate	DEAD	Helicase C	RecQ_Zn_bind	N/A	N/A	N/A	N/A	N/A
P30260	Cdc27	Cell division cycle protein 27 homolog	protein binding|protein phosphatase binding|	nucleus|nucleoplasm|anaphase-promoting complex|cytoplasm|centrosome|spindle|cytosol|spindle microtubule|	0	0	0	0	0	0	0	0	0	0	Orphan	Non-polyA	N/A	3.379	Moderate	ANAPC3	TPR1	TPR1	N/A	N/A	N/A	N/A	N/A
Q15046	Kars	Lysine--tRNA ligase	tRNA binding|lysine-tRNA ligase activity|protein binding|ATP binding|amino acid binding|metal ion binding|	extracellular region|nucleus|cytoplasm|mitochondrion|mitochondrial matrix|cytosol|plasma membrane|microtubule cytoskeleton|aminoacyl-tRNA synthetase multienzyme complex|	1	0	1	0	1	1	0	0	0	0	Known	Non-polyA	tRNA (Guzzo C.M., et al. Biochem. Biophys. Res. Commun. 2008.)	3.38933	Moderate	tRNA_anti-codon	tRNA-synt_2	N/A	N/A	N/A	N/A	N/A	N/A
Q13045	Flii	Protein flightless-1 homolog	actin binding|protein binding|	nucleoplasm|cytoplasm|microtubule organizing center|brush border|focal adhesion|	1	0	0	0	0	0	0	0	0	0	Known	Non-polyA	N/A	3.39167	Moderate	LRR_8*2	LRR_4	Gelsolin*4	N/A	N/A	N/A	N/A	N/A
Q9NXF1	Tex10	Testis-expressed protein 10	protein binding|	nucleolus|cytoplasm|integral component of membrane|nuclear membrane|MLL1 complex|	1	1	1	0	0	0	0	0	0	1	Known	polyA	polyA	3.39333	Moderate	Ipi1_N	N/A	N/A	N/A	N/A	N/A	N/A	N/A
Q9NSE4	Iars2	Isoleucine--tRNA ligase, mitochondrial	aminoacyl-tRNA editing activity|isoleucine-tRNA ligase activity|ATP binding|	cytoplasm|mitochondrion|mitochondrial matrix|cytosol|	1	0	0	0	0	1	0	0	0	0	Known	Non-polyA	tRNA (Florentz C., et al. Cell. Mol. Life. Sci. 2003.)	3.39467	Moderate	tRNA-synt_1	Anticodon_1	zf-FPG_IleRS	N/A	N/A	N/A	N/A	N/A
Q14694	Usp10	Ubiquitin carboxyl-terminal hydrolase 10	p53 binding|cysteine-type endopeptidase activity|ubiquitin-specific protease activity|protein binding|ion channel binding|poly(A) RNA binding|	nucleus|nucleoplasm|cytoplasm|early endosome|	1	1	1	1	0	0	1	0	1	1	Known	polyA	polyA	3.39567	Moderate	PAM2	UCH	N/A	N/A	N/A	N/A	N/A	N/A
Q15393	Sf3b3	Splicing factor 3B subunit 3	RNA binding|protein binding|	nucleoplasm|spliceosomal complex|U12-type spliceosomal complex|small nuclear ribonucleoprotein complex|catalytic step 2 spliceosome|	1	0	1	0	0	0	0	0	0	0	Known	Non-polyA	pre-mRNA (Chen K., et al. Clin. Cancer. Res. 2017.)	3.39833	Moderate	MMS1_N	CPSF_A	N/A	N/A	N/A	N/A	N/A	N/A
O00567	Nop56	Nucleolar protein 56	RNA binding|protein binding|snoRNA binding|poly(A) RNA binding|	nucleoplasm|nucleolus|small nucleolar ribonucleoprotein complex|cytoplasm|membrane|box C/D snoRNP complex|small-subunit processome|pre-snoRNP complex|	1	1	1	1	1	1	1	1	1	1	Known	polyA	polyA	3.4	Moderate	NOP5NT	Nop	N/A	N/A	N/A	N/A	N/A	N/A
P30101	Pdia3	Protein disulfide-isomerase A3	protein disulfide isomerase activity|cysteine-type endopeptidase activity|phospholipase C activity|protein binding|disulfide oxidoreductase activity|poly(A) RNA binding|	nucleus|endoplasmic reticulum|endoplasmic reticulum lumen|smooth endoplasmic reticulum|focal adhesion|cell surface|melanosome|myelin sheath|extracellular exosome|	1	1	1	0	1	0	0	1	1	0	Known	polyA	polyA	3.401	Moderate	Thioredoxin*2	Thioredoxin_6	N/A	N/A	N/A	N/A	N/A	N/A
Q14146	Urb2	Unhealthy ribosome biogenesis protein 2 homolog	N/A	nucleus|nucleolus|aggresome|	1	0	1	0	0	0	0	0	0	0	Known	Non-polyA	rRNA (Wang H., et al. New. Phytol. 2018.)	3.405	Moderate	Urb2	N/A	N/A	N/A	N/A	N/A	N/A	N/A
P53350	Plk1	Serine/threonine-protein kinase PLK1	protein kinase activity|protein serine/threonine kinase activity|protein binding|ATP binding|microtubule binding|anaphase-promoting complex binding|kinase activity|protein kinase binding|	kinetochore|chromatin|synaptonemal complex|spindle pole|condensed nuclear chromosome outer kinetochore|nucleus|nucleoplasm|nucleolus|cytoplasm|centrosome|spindle|cytosol|microtubule cytoskeleton|midbody|spindle midzone|spindle microtubule|	1	0	0	0	0	0	0	0	0	0	Known	Non-polyA	N/A	3.407	Moderate	Pkinase	POLO_box*2	N/A	N/A	N/A	N/A	N/A	N/A
P13010	Xrcc5	X-ray repair cross-complementing protein 5	DNA binding|damaged DNA binding|double-stranded DNA binding|ATP-dependent DNA helicase activity|protein binding|ATP binding|protein C-terminus binding|ubiquitin protein ligase binding|telomeric DNA binding|transcription regulatory region DNA binding|poly(A) RNA binding|double-stranded telomeric DNA binding|5'-deoxyribose-5-phosphate lyase activity|	nuclear telomere cap complex|nuclear chromosome, telomeric region|nucleus|nucleoplasm|nucleolus|cytosol|plasma membrane|membrane|Ku70:Ku80 complex|nonhomologous end joining complex|	1	1	1	1	1	1	0	1	1	1	Known	polyA	polyA	3.41067	Moderate	Ku_N	Ku	Ku_C	Ku_PK_bind	N/A	N/A	N/A	N/A
Q9Y2X9	Znf281	Zinc finger protein 281	RNA polymerase II core promoter proximal region sequence-specific DNA binding|core promoter binding|RNA polymerase II core promoter proximal region sequence-specific DNA binding transcription factor activity involved in negative regulation of transcription|sequence-specific DNA binding transcription factor activity|transcription corepressor activity|protein binding|sequence-specific DNA binding|t…	nucleus|nucleoplasm|	0	0	0	0	0	0	0	0	0	0	Orphan	Non-polyA	N/A	3.41267	Moderate	zf-C2H2	N/A	N/A	N/A	N/A	N/A	N/A	N/A
E9PF18	Hadh	Hydroxyacyl-coenzyme A dehydrogenase, mitochondrial	3-hydroxyacyl-CoA dehydrogenase activity|NAD+ binding|	nucleoplasm|mitochondrion|	0	0	0	0	0	0	0	0	0	0	Orphan	Non-polyA	N/A	3.41333	Moderate	3HCDH_N	3HCDH	N/A	N/A	N/A	N/A	N/A	N/A
Q4VCS5	Amot	Angiomotin	receptor activity|protein binding|angiostatin binding|	stress fiber|ruffle|cytoplasm|cytosol|actin filament|bicellular tight junction|external side of plasma membrane|cell surface|integral component of membrane|lamellipodium|endocytic vesicle|COP9 signalosome|	0	0	0	0	0	0	0	0	0	0	Orphan	Non-polyA	N/A	3.41433	Moderate	Angiomotin_C	N/A	N/A	N/A	N/A	N/A	N/A	N/A
Q9H9Y6	Polr1b	DNA-directed RNA polymerase I subunit RPA2	DNA binding|protein binding|ribonucleoside binding|metal ion binding|RNA polymerase I activity|	nucleoplasm|nucleolus|DNA-directed RNA polymerase I complex|cytoplasm|	1	0	0	0	0	0	0	0	0	0	Known	Non-polyA	rRNA (Drygin D., et al. Cancer Res. 2011.)	3.41533	Moderate	RNA_pol_Rpb2_1-7	N/A	N/A	N/A	N/A	N/A	N/A	N/A
Q9UG63	Abcf2	ATP-binding cassette sub-family F member 2	transporter activity|ATP binding|ATPase activity|	mitochondrial envelope|membrane|ATP-binding cassette (ABC) transporter complex|	1	1	1	0	0	0	0	0	0	0	Known	polyA	polyA	3.41633	Moderate	ABC_tran*2	ABC_tran_Xtn	N/A	N/A	N/A	N/A	N/A	N/A
O60287	Urb1	Nucleolar pre-ribosomal-associated protein 1	poly(A) RNA binding|	nucleolus|	1	1	1	1	0	0	1	0	1	1	Known	polyA	polyA	3.41933	Moderate	Npa1	NopRA1	N/A	N/A	N/A	N/A	N/A	N/A
Q99549	Mphosph8	M-phase phosphoprotein 8	protein binding|methylated histone binding|	nuclear nucleosome|nucleus|nucleoplasm|nuclear heterochromatin|nucleolus|cytoplasm|plasma membrane|extracellular exosome|	0	0	0	0	0	0	0	0	0	0	Orphan	Non-polyA	N/A	3.42167	Moderate	Chromo	Ank2	N/A	N/A	N/A	N/A	N/A	N/A
Q9BXJ9	Naa15	N-alpha-acetyltransferase 15, NatA auxiliary subunit	protein binding|N-acetyltransferase activity|ribosome binding|poly(A) RNA binding|acetyltransferase activity|ribosome binding|	nucleus|transcription factor complex|cytoplasm|membrane|NatA complex|	1	1	1	0	0	0	0	0	1	0	Known	polyA	polyA	3.42233	Moderate	TPR_8	NARP1	N/A	N/A	N/A	N/A	N/A	N/A
P54132	Blm	Bloom syndrome protein	bubble DNA binding|p53 binding|single-stranded DNA binding|ATP-dependent DNA helicase activity|helicase activity|protein binding|ATP binding|ATP-dependent helicase activity|four-way junction helicase activity|ATPase activity|annealing helicase activity|ATP-dependent 3'-5' DNA helicase activity|G-quadruplex DNA binding|	nuclear chromosome|lateral element|male germ cell nucleus|nucleus|nucleoplasm|replication fork|nucleolus|cytoplasm|nuclear matrix|PML body|pronucleus|chromosome, telomeric region|PML body|	1	0	0	0	0	0	0	0	0	0	Known	Non-polyA	rRNA (Grierson P.M., et al. Hum. Mol. Genet. 2012.)	3.42267	Moderate	BLM_N	BDHCT	BDHCT_assoc	DEAD	Helicase C	RecQ_Zn_bind	RQC	HRDC
Q9Y2X3	Nop58	Nucleolar protein 58	protein binding|snoRNA binding|poly(A) RNA binding|	nucleus|nucleolus|small nucleolar ribonucleoprotein complex|cytoplasm|Cajal body|membrane|box C/D snoRNP complex|small-subunit processome|pre-snoRNP complex|	1	1	1	1	1	1	1	1	1	1	Known	polyA	polyA	3.425	Moderate	NOP5NT	Nop	N/A	N/A	N/A	N/A	N/A	N/A
P18754	Rcc1	Regulator of chromosome condensation	chromatin binding|Ran guanyl-nucleotide exchange factor activity|protein binding|nucleosomal DNA binding|histone binding|	nuclear chromatin|condensed nuclear chromosome|nucleus|nucleoplasm|cytoplasm|nuclear membrane|	1	0	1	0	0	0	0	0	0	0	Known	Non-polyA	N/A	3.42733	Moderate	RCC1*7	N/A	N/A	N/A	N/A	N/A	N/A	N/A
Q03188	Cenpc	Centromere protein C	DNA binding|centromeric DNA binding|	kinetochore|condensed chromosome kinetochore|condensed nuclear chromosome, centromeric region|nucleus|nucleoplasm|pericentric heterochromatin|cytoplasm|cytosol|	0	0	0	0	0	0	0	0	0	0	Orphan	Non-polyA	N/A	3.431	Moderate	CENP_C_N	CENP-C_mid	CENP-C_C	N/A	N/A	N/A	N/A	N/A
Q9BQ75	Cmss1	Protein CMSS1	poly(A) RNA binding|	N/A	0	1	0	0	0	0	0	0	0	1	Known	polyA	polyA	3.431	Moderate	CMS1	N/A	N/A	N/A	N/A	N/A	N/A	N/A
Q8TED0	Utp15	U3 small nucleolar RNA-associated protein 15 homolog	snoRNA binding|poly(A) RNA binding|	nucleus|nucleolus|cytoplasm|cell junction|small-subunit processome|t-UTP complex|	1	1	1	1	1	0	1	0	1	1	Known	polyA	polyA	3.43167	Moderate	WD40*4	UTP15_C	N/A	N/A	N/A	N/A	N/A	N/A
Q9BY44	Eif2a	Eukaryotic translation initiation factor 2A	tRNA binding|translation initiation factor activity|protein binding|ribosome binding|	extracellular space|cytoplasm|eukaryotic translation initiation factor 2 complex|blood microparticle|	1	1	1	0	1	1	0	0	0	0	Known	polyA	polyA	3.435	Moderate	eIF2A	N/A	N/A	N/A	N/A	N/A	N/A	N/A
O75643	Snrnp200	U5 small nuclear ribonucleoprotein 200 kDa helicase	ATP-dependent RNA helicase activity|protein binding|ATP binding|ATP-dependent helicase activity|identical protein binding|poly(A) RNA binding|	nucleus|nucleoplasm|spliceosomal complex|U5 snRNP|membrane|catalytic step 2 spliceosome|	1	0	1	1	0	0	0	0	1	1	Known	polyA	polyA	3.435	Moderate	Helicase_PWI	DEAD *2	Helicase C	Sec63 *2	N/A	N/A	N/A	N/A
Q99714	Hsd17b10	3-hydroxyacyl-CoA dehydrogenase type-2	beta-amyloid binding|3-hydroxyacyl-CoA dehydrogenase activity|estradiol 17-beta-dehydrogenase activity|steroid binding|protein binding|cholate 7-alpha-dehydrogenase activity|acetoacetyl-CoA reductase activity|testosterone dehydrogenase [NAD(P)] activity|estrogen receptor binding|identical protein binding|poly(A) RNA binding|3-hydroxy-2-methylbutyryl-CoA dehydrogenase activity|NAD binding|	cytoplasm|mitochondrion|mitochondrial inner membrane|mitochondrial matrix|endoplasmic reticulum|plasma membrane|	1	0	0	1	1	1	0	0	0	0	Known	polyA	polyA	3.438	Moderate	adh_short	N/A	N/A	N/A	N/A	N/A	N/A	N/A
A5YKK6	Cnot1	CCR4-NOT transcription complex subunit 1	protein binding|protein domain specific binding|estrogen receptor binding|protein complex scaffold|retinoic acid receptor binding|poly(A) RNA binding|armadillo repeat domain binding|poly(A)-specific ribonuclease activity|	cytoplasmic mRNA processing body|extracellular space|nucleoplasm|peroxisomal membrane|cytosol|membrane|CCR4-NOT complex|	1	1	1	1	0	0	0	0	1	1	Known	polyA	polyA	3.441	Moderate	CNOT1_HEAT	CNOT1_TTP_bind	CNOT1_CAF1_bind	DUF3819	Not1	N/A	N/A	N/A
Q06265	Exosc9	Exosome complex component RRP45	3'-5'-exoribonuclease activity|RNA binding|protein binding|AU-rich element binding|poly(A) RNA binding|exoribonuclease activity|	nuclear exosome (RNase complex)|exosome (RNase complex)|nuclear chromosome|nucleus|nucleoplasm|nucleolus|cytoplasm|cytosol|intermediate filament cytoskeleton|extracellular exosome|nucleolus|	0	0	0	0	0	1	0	0	1	1	Known	polyA	polyA	3.443	Moderate	RNase_PH	RNase_PH_C	N/A	N/A	N/A	N/A	N/A	N/A
P46777	Rpl5	60S ribosomal protein L5	RNA binding|structural constituent of ribosome|protein binding|5S rRNA binding|poly(A) RNA binding|	nucleus|nucleolus|cytoplasm|cytosol|focal adhesion|membrane|cytosolic large ribosomal subunit|ribonucleoprotein complex|extracellular exosome|	1	1	1	1	1	1	1	1	1	1	Known	polyA	polyA	3.44467	Moderate	Ribosomal_L18p	Ribosomal_L18_c	N/A	N/A	N/A	N/A	N/A	N/A
P26196	Ddx6	Probable ATP-dependent RNA helicase DDX6	RNA helicase activity|ATP-dependent RNA helicase activity|helicase activity|protein binding|ATP binding|protein domain specific binding|poly(A) RNA binding|	cytoplasmic mRNA processing body|cytoplasm|cytosol|cytoplasmic stress granule|membrane|RISC complex|intracellular membrane-bounded organelle|	1	1	1	1	1	1	0	0	1	1	Known	polyA	polyA	3.44533	Moderate	DEAD	Helicase_C	N/A	N/A	N/A	N/A	N/A	N/A
Q96DN5	Tbc1d31	TBC1 domain family member 31	0	centrosome|	0	0	1	0	0	0	0	0	0	0	Known	Non-polyA	N/A	3.44633	Moderate	RabGAP-TBC	N/A	N/A	N/A	N/A	N/A	N/A	N/A
Q9NVP1	Ddx18	ATP-dependent RNA helicase DDX18	ATP-dependent RNA helicase activity|protein binding|ATP binding|poly(A) RNA binding|	nucleolus|membrane|	1	1	1	1	1	1	1	0	1	1	Known	polyA	polyA	3.44867	Moderate	DEAD	Helicase_C	DUF4217	N/A	N/A	N/A	N/A	N/A
Q13263	Trim28	Transcription intermediary factor 1-beta	DNA binding|transcription coactivator activity|transcription corepressor activity|protein kinase activity|ubiquitin-protein transferase activity|protein binding|zinc ion binding|ligase activity|ubiquitin protein ligase binding|Krueppel-associated box domain binding|poly(A) RNA binding|chromo shadow domain binding|sequence-specific DNA binding transcription factor activity|sequence-specific DNA bi…	nucleus|nucleoplasm|nuclear euchromatin|nuclear heterochromatin|RNA polymerase II transcription factor complex|	1	0	1	1	1	0	0	0	0	0	Known	polyA	polyA	3.44867	Moderate	zf-RING_5	zf-B_box*2	PHD	N/A	N/A	N/A	N/A	N/A
Q9UNQ2	Dimt1	Probable dimethyladenosine transferase	rRNA (adenine-N6,N6-)-dimethyltransferase activity|poly(A) RNA binding|18S rRNA (adenine(1779)-N(6)/adenine(1780)-N(6))-dimethyltransferase activity|	nucleus|nucleolus|cytoplasm|	0	1	1	0	0	1	0	0	0	0	Known	polyA	polyA	3.44933	Moderate	RrnaAD	N/A	N/A	N/A	N/A	N/A	N/A	N/A
A2RRP1	Nbas	Neuroblastoma-amplified sequence	SNARE binding|	nucleolus|cytoplasm|endoplasmic reticulum|endoplasmic reticulum membrane|Golgi apparatus|membrane|nuclear membrane|Dsl1p complex|	1	0	0	0	0	0	0	0	0	0	Known	Non-polyA	mRNA (Longman D., et al. BioRxiv. 2020.)	3.45267	Moderate	Nbas_N	Sec39	Sec39	N/A	N/A	N/A	N/A	N/A
Q9NX20	Mrpl16	39S ribosomal protein L16, mitochondrial	structural constituent of ribosome|rRNA binding|	mitochondrial inner membrane|mitochondrial large ribosomal subunit|	0	0	1	0	0	1	1	0	0	0	Known	polyA	polyA	3.45333	Moderate	Ribosomal_L16	N/A	N/A	N/A	N/A	N/A	N/A	N/A
Q9BPX3	Ncapg	Condensin complex subunit 3	protein binding|	condensin complex|nucleus|cytoplasm|centrosome|cytosol|actin cytoskeleton|membrane|	1	0	0	0	0	0	0	0	0	0	Known	Non-polyA	N/A	3.45367	Moderate	Cnd3	N/A	N/A	N/A	N/A	N/A	N/A	N/A
Q8WYP5	Ahctf1	Protein ELYS	DNA binding|sequence-specific DNA binding transcription factor activity|	nucleus|nucleoplasm|cytosol|nuclear matrix|nuclear membrane|extracellular exosome|condensed chromosome kinetochore|chromatin|nuclear pore|nuclear pore outer ring|	1	0	1	0	0	0	0	0	0	0	Known	Non-polyA	mRNA (Scholz B.A., et al. Nat. Genetics. 2019.)	3.45467	Moderate	ELYS-bb	ELSY	N/A	N/A	N/A	N/A	N/A	N/A
P63165	Sumo1	Small ubiquitin-related modifier 1	protein binding|transcription factor binding|potassium channel regulator activity|SUMO transferase activity|ubiquitin protein ligase binding|ion channel binding|poly(A) RNA binding|	heterochromatin|fibrillar center|XY body|nucleus|nuclear pore|nucleoplasm|nucleolus|cytoplasm|plasma membrane|PML body|nuclear speck|dendrite|nuclear membrane|synapse|voltage-gated potassium channel complex|PML body|	0	0	0	0	0	0	1	0	1	0	Known	polyA	polyA	3.46	Moderate	Rad60-SLD	N/A	N/A	N/A	N/A	N/A	N/A	N/A
Q8ND82	Znf280c	Zinc finger protein 280C	RNA polymerase II regulatory region sequence-specific DNA binding|metal ion binding|sequence-specific DNA binding RNA polymerase II transcription factor activity|	nucleus|	0	0	0	0	0	0	0	0	0	0	Orphan	Non-polyA	N/A	3.46033	Moderate	DUF4195	N/A	N/A	N/A	N/A	N/A	N/A	N/A
B5MCF9	Pes1	Pescadillo homolog	ribonucleoprotein complex binding|	nucleus|nucleoplasm|chromosome|nucleolus|cytoplasm|preribosome, large subunit precursor|	0	0	0	1	0	0	0	0	1	1	Known	polyA	polyA	3.462	Moderate	Pescadillo_N	BRCT 2	N/A	N/A	N/A	N/A	N/A	N/A
Q96HA1	Pom121	Nuclear envelope pore membrane protein POM 121	protein binding|	nuclear envelope|nuclear pore|endoplasmic reticulum membrane|nuclear membrane|	0	0	0	0	0	0	0	0	0	0	Orphan	Non-polyA	N/A	3.46633	Moderate	Pom121	N/A	N/A	N/A	N/A	N/A	N/A	N/A
P46013	Mki67	Proliferation marker protein Ki-67	protein binding|ATP binding|protein C-terminus binding|poly(A) RNA binding|	chromosome, centromeric region|condensed chromosome|nucleus|nucleolus|cytoplasm|membrane|	1	1	1	0	0	0	1	0	1	0	Known	polyA	polyA	3.467	Moderate	FHA	PP1 bind	KI67R*8	N/A	N/A	N/A	N/A	N/A
Q15021	Ncapd2	Condensin complex subunit 1	chromatin binding|protein binding|histone binding|	condensed chromosome, centromeric region|condensed chromosome|condensin complex|condensin core heterodimer|nuclear condensin complex|nucleus|nucleoplasm|cytoplasm|cytosol|membrane|nuclear chromosome|cytoplasm|	1	0	1	0	1	0	0	0	0	0	Known	Non-polyA	N/A	3.46767	Moderate	Cnd1_N	Cnd1	N/A	N/A	N/A	N/A	N/A	N/A
P40227	Cct6a	T-complex protein 1 subunit zeta	protein binding|ATP binding|poly(A) RNA binding|unfolded protein binding|	acrosomal vesicle|zona pellucida receptor complex|cytoplasm|cytosol|chaperonin-containing T-complex|microtubule|cell body|extracellular exosome|	1	0	1	0	1	0	0	0	1	0	Known	polyA	polyA	3.46767	Moderate	Cpn60_TCP1	N/A	N/A	N/A	N/A	N/A	N/A	N/A
P46781	Rps9	40S ribosomal protein S9	structural constituent of ribosome|protein binding|rRNA binding|poly(A) RNA binding|translation regulator activity|	nucleus|nucleolus|cytoplasm|cytosol|ribosome|focal adhesion|membrane|cytosolic small ribosomal subunit|ribonucleoprotein complex|extracellular exosome|	1	1	1	0	1	1	0	1	1	1	Known	polyA	polyA	3.46967	Moderate	Ribosomal_S4	S4	N/A	N/A	N/A	N/A	N/A	N/A
Q92616	Gcn1l1	eIF-2-alpha kinase activator GCN1	translation factor activity, RNA binding|poly(A) RNA binding|	cytoplasm|ribosome|membrane|	1	0	0	1	1	0	0	1	0	0	Known	polyA	polyA	3.47	Moderate	N/A	N/A	N/A	N/A	N/A	N/A	N/A	N/A
O43592	Xpot	Exportin-T	tRNA binding|Ran GTPase binding|	nucleoplasm|cytoplasm|nuclear pore|	1	0	1	0	1	1	0	0	0	0	Known	Non-polyA	tRNA (Kutay U., et al. Mol. Biol. Cell. 1998.)	3.47033	Moderate	IBN_N	Xpo1	N/A	N/A	N/A	N/A	N/A	N/A
P54577	Yars	Tyrosine--tRNA ligase, cytoplasmic	tRNA binding|tyrosine-tRNA ligase activity|signal transducer activity|interleukin-8 receptor binding|ATP binding|poly(A) RNA binding|isoleucine-tRNA ligase activity|	extracellular space|nucleus|cytoplasm|cytosol|	1	0	1	0	0	1	0	1	1	0	Known	polyA	polyA	3.47067	Moderate	tRNA-synt_1b	tRNA bind	N/A	N/A	N/A	N/A	N/A	N/A
Q9H4L4	Senp3	Sentrin-specific protease 3	endopeptidase activity|protein binding|SUMO-specific protease activity|	nucleus|nucleolus|cytoplasm|MLL1 complex|	1	0	0	0	0	0	0	0	0	0	Known	Non-polyA	rRNA (Haindl M., et al. EMBO Rep. 2008.)	3.47233	Moderate	Peptidase_C48	N/A	N/A	N/A	N/A	N/A	N/A	N/A
Q5UIP0	Rif1	Telomere-associated protein RIF1	N/A	chromosome, telomeric region|female pronucleus|male pronucleus|nucleus|cytoplasm|spindle|plasma membrane|	1	0	1	0	0	0	1	0	0	0	Known	polyA	polyA	3.47367	Moderate	Rif1_N	N/A	N/A	N/A	N/A	N/A	N/A	N/A
Q6P2Q9	Prpf8	Pre-mRNA-processing-splicing factor 8	second spliceosomal transesterification activity|protein binding|U6 snRNA binding|U1 snRNA binding|U2 snRNA binding|U5 snRNA binding|poly(A) RNA binding|K63-linked polyubiquitin binding|pre-mRNA intronic binding|	nucleus|nucleoplasm|U5 snRNP|membrane|nuclear speck|catalytic step 2 spliceosome|	1	1	1	1	1	1	0	0	1	1	Known	polyA	polyA	3.47433	Moderate	PRO8NT	PROCN	RRM_4	U5_2-snRNA_bdg	U6-snRNA_bdg	PRP8_domainIV	JAB	PROCT
Q68CQ4	Diexf	Digestive organ expansion factor homolog	protein binding|rRNA binding|U3 snoRNA binding|poly(A) RNA binding|	nucleolus|small-subunit processome|	0	1	1	0	0	0	1	0	1	0	Known	polyA	polyA	3.47767	Moderate	UTP25	N/A	N/A	N/A	N/A	N/A	N/A	N/A
Q8TF68	Znf384	Zinc finger protein 384	DNA binding|metal ion binding|	nucleus|	0	0	0	0	0	0	0	0	0	0	Orphan	Non-polyA	N/A	3.47767	Moderate	zf-C2H2*7	N/A	N/A	N/A	N/A	N/A	N/A	N/A
Q9HC35	Eml4	Echinoderm microtubule-associated protein-like 4	N/A	cytoplasm|microtubule|membrane|mitotic spindle|	1	0	1	0	0	0	0	1	0	0	Known	polyA	polyA	3.47767	Moderate	HELP	WD40*6	N/A	N/A	N/A	N/A	N/A	N/A
Q9ULK4	Med23	Mediator of RNA polymerase II transcription subunit 23	transcription coactivator activity|protein binding|ubiquitin protein ligase activity|	ubiquitin ligase complex|nucleoplasm|transcription factor complex|mediator complex|	1	0	0	0	0	0	0	0	0	0	Known	Non-polyA	N/A	3.47933	Moderate	Med23	N/A	N/A	N/A	N/A	N/A	N/A	N/A
P18077	Rpl35a	60S ribosomal protein L35a	tRNA binding|structural constituent of ribosome|poly(A) RNA binding|	mitochondrion|cytosol|membrane|cytosolic large ribosomal subunit|extracellular exosome|	0	1	1	1	0	0	0	0	1	1	Known	polyA	polyA	3.482	Moderate	Ribosomal_L35Ae	N/A	N/A	N/A	N/A	N/A	N/A	N/A
A6NHR9	Smchd1	Structural maintenance of chromosomes flexible hinge domain-containing protein 1	ATP binding|	Barr body|	1	0	0	0	0	0	0	0	0	0	Known	Non-polyA	N/A	3.48267	Moderate	HATPase_c_3	SMC_hinge	N/A	N/A	N/A	N/A	N/A	N/A
Q5SY16	Nol9	Polynucleotide 5'-hydroxyl-kinase NOL9	RNA binding|protein binding|ATP binding|polynucleotide 5'-hydroxyl-kinase activity|	nucleus|nucleolus|membrane|	1	1	1	0	0	1	0	0	0	1	Known	polyA	polyA	3.48767	Moderate	CLP1_P	N/A	N/A	N/A	N/A	N/A	N/A	N/A
Q7L2E3-2	Dhx30	Isoform 2 of Putative ATP-dependent RNA helicase DHX30	chromatin binding|double-stranded RNA binding|ATP-dependent RNA helicase activity|protein binding|ATP binding|poly(A) RNA binding|	cytoplasm|mitochondrion|mitochondrial nucleoid|	1	1	1	1	1	1	0	1	1	1	Known	polyA	polyA	3.493	Moderate	DEAD	Helicase_C	HA2	OB_NTP_bind	N/A	N/A	N/A	N/A
Q9NU22	Mdn1	Midasin	protein binding|ATP binding|ATPase activity|unfolded protein binding|	nucleus|nucleolus|cytoplasm|membrane|intermediate filament cytoskeleton|	1	0	1	0	0	0	0	0	0	0	Known	Non-polyA	N/A	3.49367	Moderate	AAA5*8	AAA_lid_7*3	AAA_lid_5	N/A	N/A	N/A	N/A	N/A
C9J6P4	Zc3hav1	Zinc finger CCCH-type antiviral protein 1	NAD+ ADP-ribosyltransferase activity|metal ion binding|	cytoplasm|	0	0	0	1	0	1	1	0	1	0	Known	polyA	polyA	3.49567	Moderate	HTH 53	zf-CCCH_8	WWE	PARP	N/A	N/A	N/A	N/A
Q9Y295	Drg1	Developmentally-regulated GTP-binding protein 1	protein binding|GTP binding|transcription factor binding|identical protein binding|	cytoplasm|polysome|membrane|	1	1	1	0	0	0	0	0	0	1	Known	polyA	polyA	3.50033	Moderate	MMR_HSR1	MMR_HSR1_Xtn	TGS	N/A	N/A	N/A	N/A	N/A
Q99661	Kif2c	Kinesin-like protein KIF2C	microtubule motor activity|protein binding|ATP binding|ATPase activity|centromeric DNA binding|microtubule plus-end binding|	chromosome, centromeric region|condensed chromosome kinetochore|nucleus|cytosol|kinesin complex|microtubule cytoskeleton|membrane|microtubule plus-end|kinetochore|cytoplasmic microtubule|	1	0	1	0	0	0	0	0	0	0	Known	Non-polyA	N/A	3.502	Moderate	Kinesin	N/A	N/A	N/A	N/A	N/A	N/A	N/A
O14744	Prmt5	Protein arginine N-methyltransferase 5	core promoter sequence-specific DNA binding|transcription corepressor activity|protein binding|methyltransferase activity|histone-arginine N-methyltransferase activity|protein complex binding|protein-arginine omega-N symmetric methyltransferase activity|ribonucleoprotein complex binding|protein heterodimerization activity|	nucleus|nucleoplasm|cytoplasm|cytosol|methylosome|	1	0	0	0	1	0	0	0	0	0	Known	Non-polyA	N/A	3.50233	Moderate	PRMT5_TIM	PRMT5	PRMT5_C	N/A	N/A	N/A	N/A	N/A
P63010	Ap2b1	AP-2 complex subunit beta	signal sequence binding|protein binding|protein transporter activity|clathrin binding|protein complex binding|clathrin adaptor activity|	trans-Golgi network|cytosol|plasma membrane|membrane|AP-2 adaptor complex|endocytic vesicle membrane|clathrin-coated endocytic vesicle membrane|intracellular membrane-bounded organelle|	1	0	1	0	0	0	0	0	0	0	Known	Non-polyA	N/A	3.50267	Moderate	Adaptin_N	Alpha_adaptinC2	B2-adapt-app_C	N/A	N/A	N/A	N/A	N/A
Q07065	Ckap4	Cytoskeleton-associated protein 4	poly(A) RNA binding|	endoplasmic reticulum|endoplasmic reticulum membrane|lipid particle|cytoskeleton|plasma membrane|membrane|integral component of membrane|perinuclear region of cytoplasm|extracellular exosome|	1	1	1	1	0	0	0	0	1	1	Known	polyA	polyA	3.50367	Moderate	N/A	N/A	N/A	N/A	N/A	N/A	N/A	N/A
P57740	Nup107	Nuclear pore complex protein Nup107	nucleocytoplasmic transporter activity|protein binding|structural constituent of nuclear pore|	condensed chromosome kinetochore|nuclear envelope|nuclear pore|nucleoplasm|centrosome|cytosol|membrane|nuclear pore outer ring|nuclear membrane|nuclear periphery|kinetochore|	1	0	0	0	0	0	0	0	0	0	Known	Non-polyA	mRNA (Guan Y., et al. J. Cell. Mol. Med. 2019.)	3.50433	Moderate	Nup84_Nup100	N/A	N/A	N/A	N/A	N/A	N/A	N/A
Q8TEQ6	Gemin5	Gem-associated protein 5	protein binding|snRNA binding|poly(A) RNA binding|	nucleus|nucleoplasm|cytoplasm|cytosol|membrane|nuclear body|SMN complex|SMN-Sm protein complex|Gemini of coiled bodies|	1	0	1	0	1	1	0	0	1	1	Known	polyA	polyA	3.50533	Moderate	WD40*3	ANAPC4_WD40*2	N/A	N/A	N/A	N/A	N/A	N/A
A0A087WVQ6	Cltc	Clathrin heavy chain	structural molecule activity|protein kinase binding|	mitochondrion|clathrin coat of trans-Golgi network vesicle|clathrin coat of coated pit|myelin sheath|	0	0	0	1	0	1	0	0	0	0	Known	polyA	polyA	3.50733	Moderate	Clathrin_propel*5	Clathrin-link	Clathrin-H-link	Clathrin*7	N/A	N/A	N/A	N/A
O75153	Cluh	Clustered mitochondria protein homolog	mRNA binding|	cytoplasm|	1	1	1	0	0	1	0	0	0	0	Known	polyA	polyA	3.50733	Moderate	Clu N	Clu	eIF3_p135	TPR_10	TPR_12	N/A	N/A	N/A
P15880	Rps2	40S ribosomal protein S2	mRNA binding|structural constituent of ribosome|protein binding|fibroblast growth factor binding|enzyme binding|poly(A) RNA binding|	nucleus|nucleoplasm|cytoplasm|cytosol|focal adhesion|membrane|cytosolic small ribosomal subunit|extracellular exosome|nucleolus|	1	1	1	1	1	1	0	1	1	1	Known	polyA	polyA	3.50767	Moderate	Ribosoma_S5	Ribosoma_S5_C	N/A	N/A	N/A	N/A	N/A	N/A
Q9Y2L1	Dis3	Exosome complex exonuclease RRP44	3'-5'-exoribonuclease activity|RNA binding|endonuclease activity|guanyl-nucleotide exchange factor activity|protein binding|	nuclear exosome (RNase complex)|cytoplasmic exosome (RNase complex)|exosome (RNase complex)|nucleoplasm|cytosol|membrane|nucleolus|	1	0	1	0	0	1	0	0	0	0	Known	Non-polyA	snoRNA (Szczepinska T., et al. Genome Res. 2015.)	3.509	Moderate	PIN_4	Rrp44_CSD1	OB_Dis3	RNB	Rrp44_S1	N/A	N/A	N/A
O60306	Aqr	Intron-binding protein aquarius	protein binding|poly(A) RNA binding|	nucleus|nucleoplasm|membrane|catalytic step 2 spliceosome|	1	1	1	1	1	1	1	1	1	1	Known	polyA	polyA	3.50933	Moderate	AAA_11	AAA_12	N/A	N/A	N/A	N/A	N/A	N/A
Q9Y4B6	Vprbp	DDB1- and CUL4-associated factor 1	protein binding|ATP binding|histone kinase activity (H2A-T120 specific)|	nucleus|nucleolus|cytoplasm|COP9 signalosome|	1	0	0	0	0	0	0	0	0	0	Known	Non-polyA	N/A	3.51267	Moderate	N/A	N/A	N/A	N/A	N/A	N/A	N/A	N/A
O15213	Wdr46	WD repeat-containing protein 46	poly(A) RNA binding|	nucleolus|90S preribosome|small-subunit processome|	1	1	1	1	1	0	1	0	0	1	Known	polyA	polyA	3.53	Moderate	BING4CT	N/A	N/A	N/A	N/A	N/A	N/A	N/A
Q8NE71	Abcf1	ATP-binding cassette sub-family F member 1	protein binding|ATP binding|translation factor activity, RNA binding|translation activator activity|ATPase activity|ribosome binding|poly(A) RNA binding|	nuclear envelope|nucleoplasm|cytoplasm|cytosol|ribosome|membrane|polysomal ribosome|	1	1	1	1	1	0	0	1	1	1	Known	polyA	polyA	3.53133	Moderate	ABC_tran*2	ABC_tran_Xtn	N/A	N/A	N/A	N/A	N/A	N/A
Q8N5C6	Srbd1	S1 RNA-binding domain-containing protein 1	RNA binding|	N/A	0	1	0	0	0	1	0	1	0	1	Known	polyA	polyA	3.53333	Moderate	TEX N	Tex_YqgF	HHH 9	HHH 3	S1	N/A	N/A	N/A
Q5JTW2	Cep78	Centrosomal protein of 78 kDa	0	centrosome|cytosol|	0	0	0	0	0	0	0	0	0	0	Orphan	Non-polyA	N/A	3.53633	Moderate	LRR_6	LRR_6	N/A	N/A	N/A	N/A	N/A	N/A
Q9NR30	Ddx21	Nucleolar RNA helicase 2	double-stranded RNA binding|ATP-dependent RNA helicase activity|protein binding|ATP binding|rRNA binding|snoRNA binding|poly(A) RNA binding|7SK snRNA binding|	nucleus|nucleoplasm|nucleolus|membrane|	1	1	1	1	1	1	1	1	1	1	Known	polyA	polyA	3.538	Moderate	DEAD	Helicase_C	GUCT	N/A	N/A	N/A	N/A	N/A
Q9H0S4	Ddx47	Probable ATP-dependent RNA helicase DDX47	ATP-dependent RNA helicase activity|protein binding|ATP binding|poly(A) RNA binding|	nucleolus|membrane|	1	1	1	1	1	1	0	0	1	1	Known	polyA	polyA	3.53833	Moderate	DEAD	Helicase_C	N/A	N/A	N/A	N/A	N/A	N/A
Q92621	Nup205	Nuclear pore complex protein Nup205	protein binding|structural constituent of nuclear pore|	nuclear envelope|nuclear pore|nucleoplasm|cytoplasm|membrane|nuclear membrane|nuclear periphery|	1	0	1	0	0	0	0	0	0	0	Known	Non-polyA	tRNA (Ikegami K., et al. Mol. Cell. 2013.)	3.54267	Moderate	Nup192	N/A	N/A	N/A	N/A	N/A	N/A	N/A
Q9BSC4	Nol10	Nucleolar protein 10	poly(A) RNA binding|	nucleolus|	1	1	1	1	0	0	1	0	1	0	Known	polyA	polyA	3.54467	Moderate	NUC153	N/A	N/A	N/A	N/A	N/A	N/A	N/A
Q14258	Trim25	E3 ubiquitin/ISG15 ligase TRIM25	sequence-specific DNA binding transcription factor activity|protein binding|zinc ion binding|acid-amino acid ligase activity|poly(A) RNA binding|ubiquitin protein ligase activity involved in ERAD pathway|	nucleoplasm|cytoplasm|cytosol|	1	1	1	0	1	0	0	1	1	1	Known	polyA	polyA	3.54567	Moderate	zf-RING_UBOX	PRY	SPRY	N/A	N/A	N/A	N/A	N/A
Q9H8H0	Nol11	Nucleolar protein 11	protein binding|poly(A) RNA binding|	nucleolus|t-UTP complex|	0	1	1	1	0	0	0	0	1	0	Known	polyA	polyA	3.546	Moderate	NUC205	N/A	N/A	N/A	N/A	N/A	N/A	N/A
Q02880	Top2b	DNA topoisomerase 2-beta	chromatin binding|DNA topoisomerase type II (ATP-hydrolyzing) activity|protein kinase C binding|ATP binding|protein C-terminus binding|DNA binding, bending|enzyme binding|histone deacetylase binding|metal ion binding|protein heterodimerization activity|	nucleus|nucleoplasm|cytoplasm|cytosol|DNA topoisomerase complex (ATP-hydrolyzing)|nucleolus|nucleoid|heterochromatin|	1	0	1	0	0	0	0	0	0	0	Known	Non-polyA	N/A	3.547	Moderate	HATPase_c	DNA_gyraseB	Toprim	TOPRIM_C	DNA_topoisoIV	DTHCT	N/A	N/A
P09874	Parp1	Poly [ADP-ribose] polymerase 1	DNA binding|chromatin binding|NAD+ ADP-ribosyltransferase activity|protein binding|transcription factor binding|zinc ion binding|enzyme binding|protein kinase binding|identical protein binding|poly(A) RNA binding|protein N-terminus binding|NAD binding|R-SMAD binding|	nucleus|nuclear envelope|nucleoplasm|transcription factor complex|nucleolus|mitochondrion|membrane|protein complex|	1	0	1	1	1	0	0	0	1	1	Known	polyA	polyA	3.54933	Moderate	zf-PARP*2	PADR1	BRCT	WGR	PARP_reg	PARP	N/A	N/A
Q9NY93	Ddx56	Probable ATP-dependent RNA helicase DDX56	ATP-dependent RNA helicase activity|ATP binding|poly(A) RNA binding|	nucleolus|membrane|	1	1	1	0	1	1	1	1	1	1	Known	polyA	polyA	3.55067	Moderate	DEAD	Helicase_C	N/A	N/A	N/A	N/A	N/A	N/A
A0A087WVM4	Mthfd1l	Monofunctional C1-tetrahydrofolate synthase, mitochondrial	formate-tetrahydrofolate ligase activity|ATP binding|methenyltetrahydrofolate cyclohydrolase activity|methylenetetrahydrofolate dehydrogenase (NADP+) activity|	cytosol|	1	0	0	0	0	0	0	0	0	0	Known	Non-polyA	miRNA (Minguzzi S., et al. Hum. Mutat. 2014.)	3.55667	Moderate	THF_DHG_CYH	THF_DHG_CYH_C	FTHFS	N/A	N/A	N/A	N/A	N/A
Q9UIG0	Baz1b	Tyrosine-protein kinase BAZ1B	chromatin binding|protein tyrosine kinase activity|non-membrane spanning protein tyrosine kinase activity|protein binding|ATP binding|zinc ion binding|histone kinase activity|lysine-acetylated histone binding|vitamin D receptor activator activity|	condensed chromosome|pericentric heterochromatin|nuclear replication fork|	1	1	0	0	0	0	0	1	0	0	Known	polyA	polyA	3.557	Moderate	WAC_Acf1_DNA_bd	WHIM1	WSD	PHD	Bromodomain	N/A	N/A	N/A
Q9UQ80	Pa2g4	Proliferation-associated protein 2G4	DNA binding|sequence-specific DNA binding transcription factor activity|protein binding|ubiquitin protein ligase binding|poly(A) RNA binding|	nucleus|nucleoplasm|nucleolus|cytoplasm|membrane|ribonucleoprotein complex|extracellular exosome|	1	1	1	0	1	1	0	0	1	1	Known	polyA	polyA	3.55867	Moderate	Peptidase_M24	N/A	N/A	N/A	N/A	N/A	N/A	N/A
Q9Y3B9	Rrp15	RRP15-like protein	0	nucleus|nucleolus|mitochondrion|	1	1	1	0	0	0	0	0	0	0	Known	polyA	polyA	3.56	Moderate	Rrp15p	N/A	N/A	N/A	N/A	N/A	N/A	N/A
Q9GZR7	Ddx24	ATP-dependent RNA helicase DDX24	RNA helicase activity|ATP-dependent RNA helicase activity|ATP binding|poly(A) RNA binding|	nucleolus|membrane|	1	1	1	1	0	1	1	0	1	1	Known	polyA	polyA	3.564	Moderate	DEAD	Helicase C	N/A	N/A	N/A	N/A	N/A	N/A
Q10567	Ap1b1	AP-1 complex subunit beta-1	transporter activity|protein binding|protein transporter activity|protein kinase binding|	Golgi membrane|lysosomal membrane|cytosol|clathrin adaptor complex|cytoplasmic vesicle membrane|clathrin-coated endocytic vesicle membrane|trans-Golgi network membrane|	1	0	0	0	0	0	0	0	0	0	Known	Non-polyA	N/A	3.56633	Moderate	Adaptin_N	B2-adapt-app_C	Alpha_adaptinC2	N/A	N/A	N/A	N/A	N/A
F2Z2E2	Iqgap3	Ras GTPase-activating-like protein IQGAP3	GTPase activator activity|	intracellular|	0	0	0	0	0	0	0	0	0	0	Orphan	Non-polyA	N/A	3.56833	Moderate	CH	IQ*4	RasGAP	RasGAP_C	N/A	N/A	N/A	N/A
P41252	Iars	Isoleucine--tRNA ligase, cytoplasmic	aminoacyl-tRNA editing activity|isoleucine-tRNA ligase activity|protein binding|ATP binding|GTPase binding|	nucleoplasm|cytoplasm|cytosol|membrane|extracellular exosome|	1	0	1	0	1	1	0	0	0	0	Known	Non-polyA	tRNA (Shiba K., et al. PNAS. 1994.)	3.56867	Moderate	tRNA-synt_1	Anticodon_1	N/A	N/A	N/A	N/A	N/A	N/A
Q9Y4C8	Rbm19	Probable RNA-binding protein 19	nucleotide binding|poly(A) RNA binding|	nucleus|nucleoplasm|chromosome|nucleolus|cytoplasm|membrane|	1	1	1	1	0	1	1	1	1	1	Known	polyA	polyA	3.56867	Moderate	RRM_1	RRM_1	RRM_1	RRM_1	RRM_1	RRM_1	N/A	N/A
C9J2Y9	Polr2b	DNA-directed RNA polymerase subunit beta	DNA binding|ribonucleoside binding|RNA polymerase II activity|	nucleoplasm|	0	0	0	1	0	0	1	0	1	1	Known	polyA	polyA	3.57267	Moderate	RNA_pol_Rpb2_1-7	N/A	N/A	N/A	N/A	N/A	N/A	N/A
Q8IY37	Dhx37	Probable ATP-dependent RNA helicase DHX37	ATP-dependent RNA helicase activity|ATP binding|poly(A) RNA binding|	nucleolus|cytoplasm|	1	0	1	0	0	1	0	0	0	0	Known	Non-polyA	snoRNA (Gerstberger, S., et al. Nat. Rev. Genetics. 2014. )	3.57333	Moderate	DEAD	Helicase C	HA2	OB_NTP_bind	N/A	N/A	N/A	N/A
Q96QD9	Fyttd1	UAP56-interacting factor	mRNA binding|protein binding|poly(A) RNA binding|	nucleoplasm|nuclear speck|	0	1	1	1	1	1	1	0	0	1	Known	polyA	polyA	3.57533	Moderate	FYTT	N/A	N/A	N/A	N/A	N/A	N/A	N/A
Q8IZH2	Xrn1	5'-3' exoribonuclease 1	DNA binding|protein binding|5'-3' exonuclease activity|poly(A) RNA binding|	cytoplasmic mRNA processing body|nucleus|cytoplasm|Golgi apparatus|cytosol|plasma membrane|membrane|intermediate filament cytoskeleton|	1	0	1	1	0	1	0	0	1	1	Known	polyA	polyA	3.57767	Moderate	XRN N	XRN M	XRN1_D1	XRN1_D2_D3	SH3 12	N/A	N/A	N/A
Q7Z2Z2	Eftud1	Elongation factor-like GTPase 1	translation elongation factor activity|GTPase activity|GTP binding|ribosome binding|	N/A	0	0	0	0	0	0	0	0	0	0	Orphan	Non-polyA	N/A	3.58567	Moderate	GTP_EFTU	EFG_II	EFG_C	N/A	N/A	N/A	N/A	N/A
Q15058	Kif14	Kinesin-like protein KIF14	microtubule motor activity|protein binding|ATP binding|microtubule binding|ATP-dependent microtubule motor activity, plus-end-directed|tubulin binding|ATPase activity|protein kinase binding|PDZ domain binding|	nucleus|cytosol|kinesin complex|microtubule|membrane|midbody|spindle midzone|plasma membrane|	1	0	1	0	0	0	0	0	0	0	Known	Non-polyA	N/A	3.592	Moderate	Kinesin	Kinesin_assoc	FHA	N/A	N/A	N/A	N/A	N/A
Q93008	Usp9x	Probable ubiquitin carboxyl-terminal hydrolase FAF-X	cysteine-type endopeptidase activity|ubiquitin-specific protease activity|protein binding|cysteine-type peptidase activity|co-SMAD binding|	cytoplasm|cytosol|membrane|growth cone|apical part of cell|	1	0	1	0	0	0	0	0	0	0	Known	Non-polyA	mRNA (Li Z., et al. Nucleic Acid Research. 2018.)	3.60467	Moderate	UCH	N/A	N/A	N/A	N/A	N/A	N/A	N/A
O00411	Polrmt	DNA-directed RNA polymerase, mitochondrial	DNA binding|DNA-directed RNA polymerase activity|protein binding|poly(A) RNA binding|	mitochondrion|mitochondrial matrix|mitochondrial nucleoid|	1	1	1	1	1	0	0	0	1	1	Known	polyA	polyA	3.605	Moderate	RPOL_N	RNA_pol	N/A	N/A	N/A	N/A	N/A	N/A
Q9NRX1	Pno1	RNA-binding protein PNO1	poly(A) RNA binding|	nucleus|nucleolus|	1	1	1	1	0	1	0	0	0	0	Known	polyA	polyA	3.61133	Moderate	N/A	N/A	N/A	N/A	N/A	N/A	N/A	N/A
P43246	Msh2	DNA mismatch repair protein Msh2	Y-form DNA binding|heteroduplex DNA loop binding|double-strand/single-strand DNA junction binding|DNA binding|protein binding|protein C-terminus binding|DNA-dependent ATPase activity|centromeric DNA binding|enzyme binding|protein kinase binding|guanine/thymine mispair binding|protein homodimerization activity|magnesium ion binding|four-way junction DNA binding|double-stranded DNA binding|single-s…	nuclear chromosome|nucleoplasm|membrane|MutSalpha complex|MutSbeta complex|	1	0	1	0	0	0	0	0	0	0	Known	Non-polyA	N/A	3.61833	Moderate	MutS I-V	N/A	N/A	N/A	N/A	N/A	N/A	N/A
Q9HCE1	Mov10	Putative helicase MOV-10	helicase activity|protein binding|ATP binding|poly(A) RNA binding|	cytoplasmic mRNA processing body|extracellular space|cytosol|	1	1	1	1	1	1	1	0	1	1	Known	polyA	polyA	3.62067	Moderate	AAA_11*2	AAA_12	N/A	N/A	N/A	N/A	N/A	N/A
P26641	Eef1g	Elongation factor 1-gamma	translation elongation factor activity|protein binding|	nucleus|cytoplasm|cytosol|membrane|extracellular exosome|endoplasmic reticulum|	1	1	1	0	1	1	0	0	0	1	Known	polyA	polyA	3.623	Moderate	GST_N	GST_C	EF1G	N/A	N/A	N/A	N/A	N/A
Q13185	Cbx3	Chromobox protein homolog 3	protein binding|enzyme binding|protein domain specific binding|identical protein binding|histone methyltransferase binding|	chromosome, centromeric region|condensed chromosome, centromeric region|chromatin|nucleus|nuclear envelope|nuclear inner membrane|nucleoplasm|nuclear euchromatin|nuclear heterochromatin|spindle|chromocenter|nuclear pericentric heterochromatin|	1	0	1	0	1	0	0	0	0	0	Known	Non-polyA	N/A	3.63433	Moderate	Chromo	Chromo_shadow	N/A	N/A	N/A	N/A	N/A	N/A
P49790	Nup153	Nuclear pore complex protein Nup153	DNA binding|transporter activity|nucleocytoplasmic transporter activity|protein binding|zinc ion binding|Ran GTPase binding|structural constituent of nuclear pore|identical protein binding|protein anchor|	nuclear pore|nuclear lamina|nucleoplasm|nucleolus|cytoplasm|nuclear membrane|nuclear periphery|nuclear inclusion body|nuclear pore nuclear basket|	0	0	0	0	0	0	0	0	0	0	Orphan	Non-polyA	N/A	3.64333	Moderate	Nup153	zf-RanBP*4	Nup_retrotrp_bd	N/A	N/A	N/A	N/A	N/A
P78344	Eif4g2	Eukaryotic translation initiation factor 4 gamma 2	translation initiation factor activity|protein binding|translation factor activity, RNA binding|poly(A) RNA binding|	cytosol|membrane|eukaryotic translation initiation factor 4F complex|	1	1	1	1	1	1	0	1	1	1	Known	polyA	polyA	3.64367	Moderate	MIF4G	MA3	W2	N/A	N/A	N/A	N/A	N/A
P55884	Eif3b	Eukaryotic translation initiation factor 3 subunit B	nucleotide binding|translation initiation factor activity|protein binding|translation initiation factor binding|protein complex scaffold|translation initiation factor activity|	nucleoplasm|cytoplasm|cytosol|eukaryotic translation initiation factor 3 complex|eukaryotic 43S preinitiation complex|eukaryotic 48S preinitiation complex|extracellular exosome|eukaryotic translation initiation factor 3 complex, eIF3m|	1	0	1	0	1	1	0	0	0	0	Known	Non-polyA	mRNA (Feng X., et al. Int. J. Biol. Sci. 2018.)	3.647	Moderate	RRM_1	eIF2A	N/A	N/A	N/A	N/A	N/A	N/A
Q9BZE4	Gtpbp4	Nucleolar GTP-binding protein 1	GTPase activity|protein binding|GTP binding|poly(A) RNA binding|	nucleus|nucleolus|cytoplasm|Golgi apparatus|membrane|nuclear membrane|perinuclear region of cytoplasm|	1	1	1	1	1	0	1	1	1	1	Known	polyA	polyA	3.64867	Moderate	NOG1	NOGCT	N/A	N/A	N/A	N/A	N/A	N/A
Q92900	Upf1	Regulator of nonsense transcripts 1	DNA binding|chromatin binding|RNA binding|ATP-dependent RNA helicase activity|helicase activity|protein binding|ATP binding|zinc ion binding|poly(A) RNA binding|	chromatin|cytoplasmic mRNA processing body|nucleus|nucleoplasm|cytoplasm|cytosol|exon-exon junction complex|supraspliceosomal complex|	1	1	1	1	1	1	0	1	1	1	Known	polyA	polyA	3.65933	Moderate	UPF1_Zn_bind	AAA_11	AAA_12	N/A	N/A	N/A	N/A	N/A
Q92667	Akap1	A-kinase anchor protein 1, mitochondrial	RNA binding|protein binding|microtubule binding|protein kinase binding|protein domain specific binding|protein phosphatase 2B binding|protein complex scaffold|protein kinase A regulatory subunit binding|poly(A) RNA binding|beta-tubulin binding|	mitochondrion|mitochondrial outer membrane|mitochondrial matrix|lipid particle|cytosol|membrane|integral component of membrane|mitochondrial crista|neuromuscular junction|postsynaptic membrane|	1	1	1	1	0	1	0	0	1	1	Known	polyA	polyA	3.66933	Moderate	KH_1	TUDOR	N/A	N/A	N/A	N/A	N/A	N/A
Q96QE3	Atad5	ATPase family AAA domain-containing protein 5	ATP binding|	nucleus|	0	0	0	0	0	0	0	0	0	0	Orphan	Non-polyA	N/A	3.67333	Moderate	AAA	N/A	N/A	N/A	N/A	N/A	N/A	N/A
P41250	Gars	Glycine--tRNA ligase	glycine-tRNA ligase activity|ATP binding|protein dimerization activity|	nucleoplasm|cytoplasm|mitochondrial matrix|cytosol|secretory granule|axon|extracellular exosome|	1	0	1	0	1	0	0	0	0	0	Known	Non-polyA	tRNA	3.67933	Moderate	WHEP-TRS	tRNA-synt_2b	HGTP_anticodon	N/A	N/A	N/A	N/A	N/A
P61313	Rpl15	60S ribosomal protein L15	RNA binding|structural constituent of ribosome|protein binding|poly(A) RNA binding|	nucleus|cytosol|ribosome|cytosolic large ribosomal subunit|extracellular exosome|	1	1	1	1	1	1	0	1	1	1	Known	polyA	polyA	3.69033	Moderate	Ribosomal_L15e	N/A	N/A	N/A	N/A	N/A	N/A	N/A
Q8N3C0	Ascc3	Activating signal cointegrator 1 complex subunit 3	protein binding|ATP binding|ATP-dependent 3'-5' DNA helicase activity|poly(A) RNA binding|	intracellular|nucleus|nucleoplasm|cytoplasm|Golgi apparatus|membrane|	1	0	1	1	0	0	0	0	0	1	Known	polyA	polyA	3.691	Moderate	DEAD*2	Helicase_C*2	Sec63*2	N/A	N/A	N/A	N/A	N/A
P12956	Xrcc6	X-ray repair cross-complementing protein 6	DNA binding|damaged DNA binding|double-stranded DNA binding|ATP-dependent DNA helicase activity|protein binding|ATP binding|protein C-terminus binding|transcription regulatory region DNA binding|poly(A) RNA binding|5'-deoxyribose-5-phosphate lyase activity|double-stranded telomeric DNA binding|	nuclear telomere cap complex|nucleus|nucleoplasm|transcription factor complex|cytosol|membrane|Ku70:Ku80 complex|nonhomologous end joining complex|	1	1	1	1	1	0	1	1	1	1	Known	polyA	polyA	3.70533	Moderate	Ku_N	Ku	Ku_C	SAP	N/A	N/A	N/A	N/A
O75691	Utp20	Small subunit processome component 20 homolog	protein binding|poly(A) RNA binding|	nucleoplasm|nucleolus|cytoplasm|90S preribosome|preribosome, small subunit precursor|small-subunit processome|	1	1	1	1	0	0	1	0	1	1	Known	polyA	polyA	3.713	Moderate	DRIM	N/A	N/A	N/A	N/A	N/A	N/A	N/A
O75592	Mycbp2	E3 ubiquitin-protein ligase MYCBP2	ubiquitin-protein transferase activity|protein binding|zinc ion binding|ligase activity|protein homodimerization activity|	nucleus|microtubule cytoskeleton|membrane|axon|	1	0	0	0	0	0	0	0	0	0	Known	Non-polyA	N/A	3.71667	Moderate	RCC1_2	RCC1	PHR*2	SH3_3	ANAPC10	zf-RING_2	N/A	N/A
P07814	Eprs	Bifunctional glutamate/proline--tRNA ligase	glutamate-tRNA ligase activity|proline-tRNA ligase activity|protein binding|ATP binding|RNA stem-loop binding|GTPase binding|	cytoplasm|cytosol|membrane|aminoacyl-tRNA synthetase multienzyme complex|ribonucleoprotein complex|GAIT complex|	1	1	1	0	1	1	0	1	0	0	Known	polyA	polyA	3.717	Moderate	GST_C	tRNA-synt_1c	tRNA-synt_1c_C	WHEP-TRS*3	tRNA-synt_2b	HGTP_anticodon	ProRS-C_1	N/A
Q9Y3A2	Utp11l	Probable U3 small nucleolar RNA-associated protein 11	protein binding|poly(A) RNA binding|	extracellular space|nucleolus|cytoplasm|small-subunit processome|	0	1	0	1	0	0	0	0	1	1	Known	polyA	polyA	3.719	Moderate	Utp11	N/A	N/A	N/A	N/A	N/A	N/A	N/A
E9PEJ4	Dlat	Acetyltransferase component of pyruvate dehydrogenase complex	dihydrolipoyllysine-residue acetyltransferase activity|	mitochondrial matrix|pyruvate dehydrogenase complex|	1	0	0	0	0	0	0	1	0	0	Known	polyA	polyA	3.73733	Moderate	Biotin_lipoyl	E3_binding	2-oxoacid_dh	N/A	N/A	N/A	N/A	N/A
Q12769	Nup160	Nuclear pore complex protein Nup160	nucleocytoplasmic transporter activity|protein binding|	nuclear envelope|nuclear pore|cytosol|nuclear pore outer ring|kinetochore|	1	0	1	0	1	0	0	0	0	0	Known	Non-polyA	mRNA (Vasu S., et al. J. Cell. Sci. 2001.)	3.746	Moderate	Nup160	N/A	N/A	N/A	N/A	N/A	N/A	N/A
P62244	Rps15a	40S ribosomal protein S15a	RNA binding|structural constituent of ribosome|poly(A) RNA binding|	cytoplasm|cytosol|membrane|cytosolic small ribosomal subunit|extracellular exosome|	1	0	1	1	1	0	0	0	1	1	Known	polyA	polyA	3.74733	Moderate	Ribosomal_S8	N/A	N/A	N/A	N/A	N/A	N/A	N/A
O15371	Eif3d	Eukaryotic translation initiation factor 3 subunit D	protein binding|poly(A) RNA binding|translation initiation factor activity|	cytosol|eukaryotic translation initiation factor 3 complex|membrane|eukaryotic 43S preinitiation complex|eukaryotic 48S preinitiation complex|eukaryotic translation initiation factor 3 complex, eIF3m|	1	1	1	1	1	1	0	0	1	1	Known	polyA	polyA	3.75167	Moderate	eIF-3_zeta	N/A	N/A	N/A	N/A	N/A	N/A	N/A
P78527	Prkdc	DNA-dependent protein kinase catalytic subunit	double-stranded DNA binding|protein kinase activity|protein serine/threonine kinase activity|DNA-dependent protein kinase activity|protein binding|ATP binding|transcription factor binding|enzyme binding|poly(A) RNA binding|	nucleoplasm|transcription factor complex|nucleolus|cytosol|DNA-dependent protein kinase-DNA ligase 4 complex|membrane|nonhomologous end joining complex|	1	1	1	1	1	0	1	0	0	1	Known	polyA	polyA	3.75367	Moderate	NUC194	FAT	PI3_PI4_kinase	FATC	N/A	N/A	N/A	N/A
Q5JRX3	Pitrm1	Presequence protease, mitochondrial	metalloendopeptidase activity|enzyme activator activity|zinc ion binding|	mitochondrion|mitochondrial matrix|	1	0	0	0	0	0	0	0	0	0	Known	Non-polyA	N/A	3.75967	Moderate	Peptidase_M16	Peptidase_M16_C	M16C_assoc	Peptidase_M16_C	N/A	N/A	N/A	N/A
Q86YT6	Mib1	E3 ubiquitin-protein ligase MIB1	ubiquitin-protein transferase activity|protein binding|zinc ion binding|ligase activity|	cytoplasm|centrosome|cytosol|plasma membrane|postsynaptic density|cytoplasmic vesicle|	1	0	0	0	0	0	0	0	0	0	Known	Non-polyA	N/A	3.762	Moderate	MIB_HERC2*2	ZZ	SH3_15*2	Ank2*2	Ank4	Ank5	zf-C3HC4_3*3	N/A
Q8NI36	Wdr36	WD repeat-containing protein 36	poly(A) RNA binding|	nucleolus|small-subunit processome|Pwp2p-containing subcomplex of 90S preribosome|	1	1	1	0	0	0	0	0	1	0	Known	polyA	polyA	3.78667	Moderate	WD40*2	ANAPC4_WD40	UTP21	N/A	N/A	N/A	N/A	N/A
Q7L0Y3	Trmt10c	tRNA methyltransferase 10 homolog C	protein binding|methyltransferase activity|poly(A) RNA binding|	nucleoplasm|mitochondrion|mitochondrial nucleoid|	1	1	1	0	0	1	1	1	0	1	Known	polyA	polyA	3.787	Moderate	tRNA_m1G_MT	N/A	N/A	N/A	N/A	N/A	N/A	N/A
P22087	Fbl	rRNA 2'-O-methyltransferase fibrillarin	RNA binding|protein binding|rRNA methyltransferase activity|poly(A) RNA binding|histone-glutamine methyltransferase activity|	dense fibrillar component|granular component|nucleus|nucleolus|Cajal body|membrane|box C/D snoRNP complex|small-subunit processome|extracellular exosome|	1	1	1	1	1	1	1	0	1	1	Known	polyA	polyA	3.79367	Moderate	Fibrillarin	N/A	N/A	N/A	N/A	N/A	N/A	N/A
Q00341	Hdlbp	Vigilin	protein binding|lipid binding|poly(A) RNA binding|	nucleus|cytoplasm|plasma membrane|high-density lipoprotein particle|	1	1	1	1	1	1	1	1	1	1	Known	polyA	polyA	3.816	Moderate	KH_1*14	N/A	N/A	N/A	N/A	N/A	N/A	N/A
P39023	Rpl3	60S ribosomal protein L3	RNA binding|structural constituent of ribosome|poly(A) RNA binding|	nucleus|nucleoplasm|nucleolus|cytoplasm|cytosol|focal adhesion|cytosolic large ribosomal subunit|extracellular exosome|	1	1	1	1	1	1	0	1	1	1	Known	polyA	polyA	3.81833	Moderate	Ribosomal_L3	N/A	N/A	N/A	N/A	N/A	N/A	N/A
Q9NVV4	Mtpap	Poly(A) RNA polymerase, mitochondrial	magnesium ion binding|UTP binding|polynucleotide adenylyltransferase activity|protein binding|ATP binding|manganese ion binding|identical protein binding|protein homodimerization activity|poly(A) RNA binding|	mitochondrion|intracellular membrane-bounded organelle|	1	1	1	1	0	1	1	0	1	1	Known	polyA	polyA	3.81833	Moderate	RL	PAP_assoc	N/A	N/A	N/A	N/A	N/A	N/A
Q9NZI8	Igf2bp1	Insulin-like growth factor 2 mRNA-binding protein 1	nucleotide binding|mRNA binding|mRNA 3'-UTR binding|protein binding|poly(A) RNA binding|translation regulator activity|mRNA 5'-UTR binding|	nucleus|cytoplasm|cytosol|cytoplasmic stress granule|lamellipodium|filopodium|axon|growth cone|ribonucleoprotein complex|dendritic spine|perinuclear region of cytoplasm|CRD-mediated mRNA stability complex|	0	1	1	1	1	1	1	1	1	1	Known	polyA	polyA	3.82333	Moderate	RRM_1	RRM_6	KH_1*4	N/A	N/A	N/A	N/A	N/A
P49792	Ranbp2	E3 SUMO-protein ligase RanBP2	RNA binding|peptidyl-prolyl cis-trans isomerase activity|protein binding|zinc ion binding|Ran GTPase binding|ligase activity|protein complex binding|	nuclear pore|mitochondrion|cytosol|membrane|nuclear membrane|nuclear inclusion body|nuclear pore cytoplasmic filaments|nuclear pore nuclear basket|	1	0	1	0	0	1	0	1	0	0	Known	polyA	polyA	3.85133	Moderate	Ran_BP1*4	zf-RanBP*8	IR1-M*3	Pro_isomerase	N/A	N/A	N/A	N/A
Q9Y2R4	Ddx52	Probable ATP-dependent RNA helicase DDX52	helicase activity|ATP binding|poly(A) RNA binding|	nucleus|nucleolus|membrane|	1	1	1	1	1	1	1	0	1	1	Known	polyA	polyA	3.868	Moderate	DEAD	Helicase_C	N/A	N/A	N/A	N/A	N/A	N/A
P40429	Rpl13a	60S ribosomal protein L13a	mRNA binding|structural constituent of ribosome|poly(A) RNA binding|	nucleus|nucleolus|cytoplasm|cytosol|focal adhesion|large ribosomal subunit|membrane|cytosolic large ribosomal subunit|ribonucleoprotein complex|GAIT complex|	1	1	1	0	1	1	0	0	1	1	Known	polyA	polyA	3.88267	Moderate	Ribosomal_L13	N/A	N/A	N/A	N/A	N/A	N/A	N/A
Q9UNX4	Wdr3	WD repeat-containing protein 3	snoRNA binding|poly(A) RNA binding|	nucleus|nucleolus|nuclear membrane|small-subunit processome|Pwp2p-containing subcomplex of 90S preribosome|	1	1	1	0	1	1	0	0	1	0	Known	polyA	polyA	3.887	Moderate	ANAPC4_WD40	WD40*7	Utp12	N/A	N/A	N/A	N/A	N/A
P32969	Rpl9	60S ribosomal protein L9	RNA binding|structural constituent of ribosome|protein binding|rRNA binding|	nucleus|nucleolus|cytoplasm|cytosol|ribosome|focal adhesion|membrane|cytosolic large ribosomal subunit|	0	0	1	0	1	1	0	0	0	1	Known	polyA	polyA	3.89133	Moderate	Ribosomal_L6*2	N/A	N/A	N/A	N/A	N/A	N/A	N/A
Q7KZF4	Snd1	Staphylococcal nuclease domain-containing protein 1	transcription cofactor activity|nuclease activity|protein binding|poly(A) RNA binding|	nucleus|cytoplasm|mitochondrion|membrane|RISC complex|melanosome|extracellular exosome|dense body|	1	1	1	1	1	1	1	1	1	1	Known	polyA	polyA	3.897	Moderate	Snase*5	TUDOR	N/A	N/A	N/A	N/A	N/A	N/A
Q14690	Pdcd11	Protein RRP5 homolog	protein binding|transcription factor binding|poly(A) RNA binding|	nucleus|nucleolus|cytosol|small-subunit processome|	1	1	1	0	1	1	0	1	1	1	Known	polyA	polyA	3.91567	Moderate	S1*4	Suf	N/A	N/A	N/A	N/A	N/A	N/A
Q14692	Bms1	Ribosome biogenesis protein BMS1 homolog	ATP binding|poly(A) RNA binding|	nucleus|nucleolus|	1	1	1	1	0	1	1	1	1	1	Known	polyA	polyA	3.92167	Moderate	AARP2CN	RIBIOP_C	N/A	N/A	N/A	N/A	N/A	N/A
P62906	Rpl10a	60S ribosomal protein L10a	structural constituent of ribosome|protein binding|poly(A) RNA binding|	nucleus|nucleolus|cytoplasm|mitochondrion|cytosol|focal adhesion|membrane|cytosolic large ribosomal subunit|extracellular exosome|	1	1	1	1	1	1	0	1	1	1	Known	polyA	polyA	3.943	Moderate	Ribosomal_L1	N/A	N/A	N/A	N/A	N/A	N/A	N/A
Q6DKI1	Rpl7l1	60S ribosomal protein L7-like 1	structural constituent of ribosome|poly(A) RNA binding|	nucleolus|cytosolic large ribosomal subunit|	1	1	1	1	0	1	0	0	1	1	Known	polyA	polyA	3.94333	Moderate	Ribosomal_L30N	Ribosomal_L30	N/A	N/A	N/A	N/A	N/A	N/A
O75534	Csde1	Cold shock domain-containing protein E1	DNA binding|protein binding|poly(A) RNA binding|	cytoplasm|mitochondrial inner membrane|Golgi apparatus|plasma membrane|CRD-mediated mRNA stability complex|	1	1	1	1	1	1	1	1	1	1	Known	polyA	polyA	3.944	Moderate	CSD*5	SUZ-C	N/A	N/A	N/A	N/A	N/A	N/A
Q9NW13	Rbm28	RNA-binding protein 28	nucleotide binding|poly(A) RNA binding|	spliceosomal complex|nucleolus|	1	1	1	1	1	1	1	1	1	1	Known	polyA	polyA	3.95633	Moderate	RRM_1*3	N/A	N/A	N/A	N/A	N/A	N/A	N/A
P62314	Snrpd1	Small nuclear ribonucleoprotein Sm D1	RNA binding|protein binding|poly(A) RNA binding|	nucleus|nucleoplasm|U1 snRNP|U4 snRNP|U12-type spliceosomal complex|cytosol|small nuclear ribonucleoprotein complex|methylosome|pICln-Sm protein complex|SMN-Sm protein complex|catalytic step 2 spliceosome|	0	1	0	1	0	1	0	1	1	1	Known	polyA	polyA	3.994	Moderate	LSM	N/A	N/A	N/A	N/A	N/A	N/A	N/A
P38432	Coil	Coilin	protein binding|protein C-terminus binding|identical protein binding|	nucleus|nucleoplasm|nucleolus|cytoplasm|Cajal body|membrane|	1	0	1	0	0	1	0	0	0	0	Known	Non-polyA	snoRNA (Machyna M., et al. Mol. Cell. 2014.)	4.00667	Moderate	Coilin_N	N/A	N/A	N/A	N/A	N/A	N/A	N/A
P23396	Rps3	40S ribosomal protein S3	damaged DNA binding|mRNA binding|structural constituent of ribosome|DNA-(apurinic or apyrimidinic site) lyase activity|protein binding|oxidized purine nucleobase lesion DNA N-glycosylase activity|enzyme binding|protein kinase binding|poly(A) RNA binding|protein kinase A binding|NF-kappaB binding|iron-sulfur cluster binding|	nucleus|nucleolus|cytoplasm|mitochondrial inner membrane|spindle|cytosol|focal adhesion|membrane|cytosolic small ribosomal subunit|ribonucleoprotein complex|ruffle membrane|extracellular exosome|NF-kappaB complex|	1	1	1	1	1	1	1	1	1	1	Known	polyA	polyA	4.01267	Moderate	KH_2	Ribosomal_S3_C	N/A	N/A	N/A	N/A	N/A	N/A
A0A1B0GUN3	FBRSL1	Fibrosin-1-like protein	N/A	N/A	0	0	0	0	0	0	0	0	0	0	Orphan	Non-polyA	N/A	4.027	Moderate	N/A	N/A	N/A	N/A	N/A	N/A	N/A	N/A
Q9BYD6	Mrpl1	39S ribosomal protein L1, mitochondrial	structural constituent of ribosome|protein binding|poly(A) RNA binding|	nucleoplasm|mitochondrion|mitochondrial inner membrane|large ribosomal subunit|	0	1	1	1	0	1	0	0	1	1	Known	polyA	polyA	4.02833	Moderate	Ribosomal_L1	N/A	N/A	N/A	N/A	N/A	N/A	N/A
P42704	Lrpprc	Leucine-rich PPR motif-containing protein, mitochondrial	single-stranded DNA binding|RNA binding|protein binding|microtubule binding|ubiquitin protein ligase binding|poly(A) RNA binding|beta-tubulin binding|actin filament binding|	condensed nuclear chromosome|nucleus|nuclear inner membrane|nuclear outer membrane|nucleoplasm|mitochondrion|cytoskeleton|microtubule|membrane|ribonucleoprotein complex|mitochondrial nucleoid|perinuclear region of cytoplasm|mitochondrion|	1	1	1	1	1	1	1	1	1	0	Known	polyA	polyA	4.02933	Moderate	PPR*6	N/A	N/A	N/A	N/A	N/A	N/A	N/A
P62316	Snrpd2	Small nuclear ribonucleoprotein Sm D2	protein binding|poly(A) RNA binding|	nucleoplasm|spliceosomal complex|U1 snRNP|U4 snRNP|U12-type spliceosomal complex|cytosol|small nuclear ribonucleoprotein complex|methylosome|pICln-Sm protein complex|SMN-Sm protein complex|extracellular exosome|catalytic step 2 spliceosome|	0	1	1	0	0	0	0	1	1	1	Known	polyA	polyA	4.04033	Moderate	LSM	N/A	N/A	N/A	N/A	N/A	N/A	N/A
P05455	Ssb	Lupus La protein	tRNA binding|nucleotide binding|mRNA binding|protein binding|poly(A) RNA binding|	nucleus|ribonucleoprotein complex|	1	1	1	1	1	1	1	1	1	1	Known	polyA	polyA	4.067	Moderate	La	RRM_1	RRM_3	N/A	N/A	N/A	N/A	N/A
Q9H583	Heatr1	HEAT repeat-containing protein 1	protein binding|snoRNA binding|poly(A) RNA binding|	nucleus|nucleolus|mitochondrion|membrane|90S preribosome|small-subunit processome|t-UTP complex|	1	1	1	1	1	1	0	0	1	0	Known	polyA	polyA	4.07367	Moderate	U3snoRNP10	BP28CT	N/A	N/A	N/A	N/A	N/A	N/A
Q04837	Ssbp1	Single-stranded DNA-binding protein, mitochondrial	chromatin binding|single-stranded DNA binding|protein binding|poly(A) RNA binding|	nucleus|mitochondrion|mitochondrial matrix|mitochondrial nucleoid|extracellular exosome|	0	1	1	1	0	0	0	1	1	1	Known	polyA	polyA	4.11433	Moderate	Ssb	N/A	N/A	N/A	N/A	N/A	N/A	N/A
O76021	Rsl1d1	Ribosomal L1 domain-containing protein 1	poly(A) RNA binding|	nucleolus|membrane|	1	1	1	1	1	1	1	1	1	1	Known	polyA	polyA	4.11733	Moderate	Ribosomal_L1	N/A	N/A	N/A	N/A	N/A	N/A	N/A
K7ERI7	Rpl22	60S ribosomal protein L22	structural constituent of ribosome|	ribosome|	0	0	0	1	0	1	1	0	1	1	Known	polyA	polyA	4.138	Moderate	Ribosomal_L22e	N/A	N/A	N/A	N/A	N/A	N/A	N/A
P18124	Rpl7	60S ribosomal protein L7	DNA binding|RNA binding|mRNA binding|structural constituent of ribosome|protein binding|protein homodimerization activity|poly(A) RNA binding|	nucleus|nucleolus|cytoplasm|cytosol|polysome|focal adhesion|membrane|cytosolic large ribosomal subunit|ribonucleoprotein complex|extracellular exosome|	1	1	1	1	1	1	0	0	1	1	Known	polyA	polyA	4.29567	Moderate	Ribosomal_L30_N	Ribosomal_L30	N/A	N/A	N/A	N/A	N/A	N/A
M0QZC5	Rps11	40S ribosomal protein S11	structural constituent of ribosome|	ribosome|	0	0	0	0	0	1	0	0	1	1	Known	polyA	polyA	4.41767	Moderate	Ribosomal_S17N	Ribosomal_S17	N/A	N/A	N/A	N/A	N/A	N/A
Q8ND04	Smg8	Protein SMG8	protein binding|	cytosol|	1	0	0	0	0	0	0	0	0	1	Known	polyA	polyA	4.55533	Moderate	Smg8_Smg9	N/A	N/A	N/A	N/A	N/A	N/A	N/A

## Sheet: Tab 2.Gold list for sensitivity
Gene symbol	Protein name	GO molecular function	SerIC	RBR-ID	APEX-PS
POLDIP3	polymerase (DNA-directed), delta interacting protein 3 [Source:HGNC Symbol;Acc:23782]	RNA binding,positive regulation of translation,poly(A)+ mRNA export from nucleus	1	0	1
FBL	fibrillarin [Source:HGNC Symbol;Acc:3599]	RNA binding,rRNA processing,tRNA processing,tRNA (adenine-N1-)-methyltransferase activity,tRNA (m1A) methyltransferase complex,tRNA methylation,box C/D snoRNP complex,snoRNA metabolic process	1	1	1
HNRNPC	heterogeneous nuclear ribonucleoprotein C (C1/C2) [Source:HGNC Symbol;Acc:5035]	RNA binding,mRNA binding,spliceosomal complex,catalytic step 2 spliceosome,RNA splicing,mRNA splicing, via spliceosome,ribonucleoprotein complex	1	1	1
HNRNPH3	heterogeneous nuclear ribonucleoprotein H3 (2H9) [Source:HGNC Symbol;Acc:5043]	ribonucleoprotein complex,RNA binding,RNA splicing,mRNA splicing, via spliceosome,RNA processing	1	1	1
HNRNPLL	heterogeneous nuclear ribonucleoprotein L-like [Source:HGNC Symbol;Acc:25127]	RNA binding,mRNA processing,ribonucleoprotein complex,mRNA binding,positive regulation of RNA splicing	1	1	1
CDC40	cell division cycle 40 homolog (S. cerevisiae) [Source:HGNC Symbol;Acc:17350]	spliceosomal complex,catalytic step 2 spliceosome,RNA splicing,mRNA splicing, via spliceosome,mRNA export from nucleus,mRNA 3'-end processing	0	1	1
IPO7	importin 7 [Source:HGNC Symbol;Acc:9852]	.	0	1	1
KARS	lysyl-tRNA synthetase [Source:HGNC Symbol;Acc:6215]	tRNA binding,lysine-tRNA ligase activity,aminoacyl-tRNA synthetase multienzyme complex,lysyl-tRNA aminoacylation,aminoacyl-tRNA ligase activity,tRNA aminoacylation for protein translation,tRNA processing	0	1	1
PRPF3	PRP3 pre-mRNA processing factor 3 homolog (S. cerevisiae) [Source:HGNC Symbol;Acc:17348]	U4/U6 x U5 tri-snRNP complex,mRNA splicing, via spliceosome,mRNA processing,spliceosomal complex,RNA splicing,RNA splicing, via transesterification reactions	0	1	1
PRPF31	PRP31 pre-mRNA processing factor 31 homolog (S. cerevisiae) [Source:HGNC Symbol;Acc:15446]	U4/U6 x U5 tri-snRNP complex,RNA binding,ribonucleoprotein complex binding,snRNP binding,U4 snRNP,U2-type spliceosomal complex,U4atac snRNP,mRNA splicing, via spliceosome	0	1	1
PRPF6	PRP6 pre-mRNA processing factor 6 homolog (S. cerevisiae) [Source:HGNC Symbol;Acc:15860]	RNA binding,ribonucleoprotein complex binding,spliceosomal complex,U4/U6 x U5 tri-snRNP complex,U4/U6 snRNP,catalytic step 2 spliceosome,U5 snRNP,RNA splicing,mRNA splicing, via spliceosome,RNA processing,spliceosomal complex assembly,RNA splicing, via transesterification reactions,RNA localization	0	1	1
RARS	arginyl-tRNA synthetase [Source:HGNC Symbol;Acc:9870]	tRNA binding,aminoacyl-tRNA ligase activity,arginine-tRNA ligase activity,aminoacyl-tRNA synthetase multienzyme complex,tRNA aminoacylation for protein translation,arginyl-tRNA aminoacylation	0	1	1
RPP30	ribonuclease P/MRP 30kDa subunit [Source:HGNC Symbol;Acc:17688]	ribonuclease activity,ribonuclease P activity,nucleolar ribonuclease P complex,tRNA processing	0	1	1
SF3A1	splicing factor 3a, subunit 1, 120kDa [Source:HGNC Symbol;Acc:10765]	RNA binding,RNA processing,spliceosomal complex,catalytic step 2 spliceosome,U2-type spliceosomal complex,mRNA processing,RNA splicing,mRNA splicing, via spliceosome,mRNA 3'-splice site recognition	0	1	1
SF3B2	splicing factor 3b, subunit 2, 145kDa [Source:HGNC Symbol;Acc:10769]	spliceosomal complex,U12-type spliceosomal complex,catalytic step 2 spliceosome,mRNA processing,RNA splicing,mRNA splicing, via spliceosome	0	1	1
SFSWAP	splicing factor, suppressor of white-apricot homolog (Drosophila) [Source:HGNC Symbol;Acc:10790]	RNA binding,RNA processing,mRNA processing,mRNA splice site selection,negative regulation of mRNA splicing, via spliceosome	0	1	1
SNRPB	small nuclear ribonucleoprotein polypeptides B and B1 [Source:HGNC Symbol;Acc:11153]	histone pre-mRNA DCP binding,spliceosomal complex,histone pre-mRNA 3'end processing complex,small nuclear ribonucleoprotein complex,U12-type spliceosomal complex,catalytic step 2 spliceosome,U7 snRNP,RNA metabolic process,RNA splicing,mRNA splicing, via spliceosome,mRNA 3'-end processing,spliceosomal snRNP assembly,ncRNA metabolic process,histone mRNA metabolic process	0	1	1
YARS	tyrosyl-tRNA synthetase [Source:HGNC Symbol;Acc:12840]	tRNA binding,aminoacyl-tRNA ligase activity,tyrosine-tRNA ligase activity,tRNA aminoacylation for protein translation,tyrosyl-tRNA aminoacylation	0	1	1
NOP56	NOP56 ribonucleoprotein [Source:HGNC Symbol;Acc:15911]	RNA binding,snoRNA binding,small nucleolar ribonucleoprotein complex,box C/D snoRNP complex,pre-snoRNP complex,rRNA processing	1	0	1
NOP58	NOP58 ribonucleoprotein [Source:HGNC Symbol;Acc:29926]	snoRNA binding,small nucleolar ribonucleoprotein complex,box C/D snoRNP complex,pre-snoRNP complex,snRNP protein import into nucleus,rRNA processing	1	0	1
RPS18	ribosomal protein S18 [Source:HGNC Symbol;Acc:10401]	RNA binding,structural constituent of ribosome,cytosolic small ribosomal subunit,ribosome,translation,rRNA binding,small ribosomal subunit,ribosome biogenesis,RNA metabolic process,mRNA metabolic process,translational elongation,translational initiation,nuclear-transcribed mRNA catabolic process, nonsense-mediated decay,translational termination	1	0	1
RSL1D1	ribosomal L1 domain containing 1 [Source:HGNC Symbol;Acc:24534]	RNA binding	1	0	1
TRMT10C	tRNA methyltransferase 10 homolog C (S. cerevisiae) [Source:HGNC Symbol;Acc:26022]	tRNA processing,mitochondrial RNA 5'-end processing	1	0	1
TRMT10C	tRNA methyltransferase 10 homolog C (S. cerevisiae) [Source:HGNC Symbol;Acc:26022]	tRNA processing,mitochondrial RNA 5'-end processing	1	0	1
IPO11	importin 11 [Source:HGNC Symbol;Acc:20628]	ribosomal protein import into nucleus	0	0	1
IPO4	importin 4 [Source:HGNC Symbol;Acc:19426]	.	0	0	1
IPO9	importin 9 [Source:HGNC Symbol;Acc:19425]	.	0	0	1
LARS	leucyl-tRNA synthetase [Source:HGNC Symbol;Acc:6512]	aminoacyl-tRNA editing activity,aminoacyl-tRNA ligase activity,leucine-tRNA ligase activity,tRNA aminoacylation for protein translation,leucyl-tRNA aminoacylation	0	0	1
RPL12	ribosomal protein L12 [Source:HGNC Symbol;Acc:10302]	RNA binding,structural constituent of ribosome,ribosome,cytosolic large ribosomal subunit,translation,RNA metabolic process,mRNA metabolic process,translational elongation,translational initiation,nuclear-transcribed mRNA catabolic process, nonsense-mediated decay,translational termination	0	0	1
RPL15	ribosomal protein L15 [Source:HGNC Symbol;Acc:10306]	RNA binding,structural constituent of ribosome,ribosome,cytosolic large ribosomal subunit,translation,RNA metabolic process,mRNA metabolic process,translational elongation,translational initiation,nuclear-transcribed mRNA catabolic process, nonsense-mediated decay,translational termination	0	0	1
RPL3	ribosomal protein L3 [Source:HGNC Symbol;Acc:10332]	structural constituent of ribosome,ribosome,translation,RNA binding,cytosolic large ribosomal subunit,RNA metabolic process,mRNA metabolic process,translational elongation,translational initiation,nuclear-transcribed mRNA catabolic process, nonsense-mediated decay,translational termination	0	0	1
RPLP0	ribosomal protein, large, P0 [Source:HGNC Symbol;Acc:10371]	RNA binding,structural constituent of ribosome,ribosome,ribonucleoprotein complex,cytosolic large ribosomal subunit,translation,ribosome biogenesis,RNA metabolic process,mRNA metabolic process,translational elongation,translational initiation,nuclear-transcribed mRNA catabolic process, nonsense-mediated decay,translational termination	0	0	1
SNRPD1	small nuclear ribonucleoprotein D1 polypeptide 16kDa [Source:HGNC Symbol;Acc:11158]	RNA binding,small nuclear ribonucleoprotein complex,U12-type spliceosomal complex,catalytic step 2 spliceosome,RNA metabolic process,RNA splicing,mRNA splicing, via spliceosome,spliceosomal complex assembly,spliceosomal snRNP assembly,ncRNA metabolic process	0	0	1
XPO5	exportin 5 [Source:HGNC Symbol;Acc:17675]	tRNA binding,RNA binding,gene silencing by RNA	0	0	1
HNRNPA0	heterogeneous nuclear ribonucleoprotein A0 [Source:HGNC Symbol;Acc:5030]	AU-rich element binding,RNA binding,ribonucleoprotein complex,3'-UTR-mediated mRNA stabilization,mRNA processing,RNA splicing,mRNA splicing, via spliceosome	1	1	1
HNRNPA2B1	heterogeneous nuclear ribonucleoprotein A2/B1 [Source:HGNC Symbol;Acc:5033]	RNA binding,pre-mRNA intronic binding,spliceosomal complex,ribonucleoprotein complex,catalytic step 2 spliceosome,mRNA processing,RNA splicing,mRNA splicing, via spliceosome,negative regulation of mRNA splicing, via spliceosome,RNA transport	1	1	1
HNRNPAB	heterogeneous nuclear ribonucleoprotein A/B [Source:HGNC Symbol;Acc:5034]	RNA binding,mRNA binding,ribonucleoprotein complex	1	1	1
HNRNPD	heterogeneous nuclear ribonucleoprotein D (AU-rich element RNA binding protein 1, 37kDa) [Source:HGNC Symbol;Acc:5036]	regulation of mRNA stability,ribonucleoprotein complex,RNA binding,RNA metabolic process,mRNA metabolic process,RNA splicing,mRNA splicing, via spliceosome,RNA processing,RNA catabolic process	1	1	1
HNRNPDL	heterogeneous nuclear ribonucleoprotein D-like [Source:HGNC Symbol;Acc:5037]	RNA binding,poly(A) RNA binding,poly(G) RNA binding,spliceosomal complex,RNA processing	1	1	1
HNRNPH1	heterogeneous nuclear ribonucleoprotein H1 (H) [Source:HGNC Symbol;Acc:5041]	RNA binding,poly(U) RNA binding,catalytic step 2 spliceosome,RNA splicing,mRNA splicing, via spliceosome,RNA processing,regulation of RNA splicing	1	1	1
HNRNPK	heterogeneous nuclear ribonucleoprotein K [Source:HGNC Symbol;Acc:5044]	RNA binding,catalytic step 2 spliceosome,RNA splicing,mRNA splicing, via spliceosome,RNA processing	1	1	1
HNRNPL	heterogeneous nuclear ribonucleoprotein L [Source:HGNC Symbol;Acc:5045]	RNA binding,mRNA processing,ribonucleoprotein complex,RNA splicing,mRNA splicing, via spliceosome,RNA processing	1	1	1
HNRNPM	heterogeneous nuclear ribonucleoprotein M [Source:HGNC Symbol;Acc:5046]	RNA binding,mRNA splicing, via spliceosome,spliceosomal complex,catalytic step 2 spliceosome,RNA splicing,alternative mRNA splicing, via spliceosome	1	1	1
HNRNPR	heterogeneous nuclear ribonucleoprotein R [Source:HGNC Symbol;Acc:5047]	RNA binding,spliceosomal complex,ribonucleoprotein complex,catalytic step 2 spliceosome,mRNA processing,RNA splicing,mRNA splicing, via spliceosome	1	1	1
HNRNPU	heterogeneous nuclear ribonucleoprotein U (scaffold attachment factor A) [Source:HGNC Symbol;Acc:5048]	RNA binding,ribonucleoprotein complex,catalytic step 2 spliceosome,CRD-mediated mRNA stability complex,RNA splicing,mRNA splicing, via spliceosome,RNA processing,CRD-mediated mRNA stabilization	1	1	1
HNRNPUL2	heterogeneous nuclear ribonucleoprotein U-like 2 [Source:HGNC Symbol;Acc:25451]	.	1	1	1
POLR2A	polymerase (RNA) II (DNA directed) polypeptide A, 220kDa [Source:HGNC Symbol;Acc:9187]	RNA-directed RNA polymerase activity,RNA splicing,mRNA splicing, via spliceosome,7-methylguanosine mRNA capping	1	1	1
RTCB	chromosome 22 open reading frame 28 [Source:HGNC Symbol;Acc:26935]	RNA processing,RNA ligase (ATP) activity,tRNA-splicing ligase complex,tRNA splicing, via endonucleolytic cleavage and ligation	1	1	1
SF1	splicing factor 1 [Source:HGNC Symbol;Acc:12950]	RNA binding,ribosome,spliceosomal complex,mRNA splicing, via spliceosome,spliceosomal complex assembly,mRNA 3'-splice site recognition	1	1	1
SF3B1	splicing factor 3b, subunit 1, 155kDa [Source:HGNC Symbol;Acc:10768]	spliceosomal complex,U12-type spliceosomal complex,catalytic step 2 spliceosome,RNA splicing,mRNA splicing, via spliceosome,RNA splicing, via transesterification reactions	1	1	1
SFPQ	splicing factor proline/glutamine-rich [Source:HGNC Symbol;Acc:10774]	RNA binding,mRNA processing,RNA splicing,alternative mRNA splicing, via spliceosome	1	1	1
HEATR1	HEAT repeat containing 1 [Source:HGNC Symbol;Acc:25517]	ribonucleoprotein complex,rRNA processing	0	1	1
PRPF19	PRP19/PSO4 pre-mRNA processing factor 19 homolog (S. cerevisiae) [Source:HGNC Symbol;Acc:17896]	positive regulation of mRNA splicing, via spliceosome,catalytic step 2 spliceosome,mRNA splicing, via spliceosome,spliceosomal complex assembly	0	1	1
PRPF8	PRP8 pre-mRNA processing factor 8 homolog (S. cerevisiae) [Source:HGNC Symbol;Acc:17340]	RNA binding,spliceosomal complex,mRNA splicing, via spliceosome,U6 snRNA binding,U5 snRNA binding,catalytic step 2 spliceosome,U5 snRNP,mRNA processing,RNA splicing,RNA splicing, via transesterification reactions	0	1	1
RPL7L1	ribosomal protein L7-like 1 [Source:HGNC Symbol;Acc:21370]	ribosome	0	1	1
SF3B3	splicing factor 3b, subunit 3, 130kDa [Source:HGNC Symbol;Acc:10770]	spliceosomal complex,small nuclear ribonucleoprotein complex,U12-type spliceosomal complex,catalytic step 2 spliceosome,mRNA processing,RNA splicing,mRNA splicing, via spliceosome,RNA splicing, via transesterification reactions	0	1	1
SNRPA	small nuclear ribonucleoprotein polypeptide A [Source:HGNC Symbol;Acc:11151]	snRNA binding,mRNA splicing, via spliceosome,RNA binding,spliceosomal complex,RNA splicing	0	1	1
HNRNPUL1	heterogeneous nuclear ribonucleoprotein U-like 1 [Source:HGNC Symbol;Acc:17011]	ribonucleoprotein complex,RNA binding,RNA splicing,mRNA splicing, via spliceosome,RNA processing	1	0	1
POLR2B	polymerase (RNA) II (DNA directed) polypeptide B, 140kDa [Source:HGNC Symbol;Acc:9188]	ribonucleoside binding,RNA splicing,mRNA splicing, via spliceosome,7-methylguanosine mRNA capping	1	0	1
RPL22	ribosomal protein L22 [Source:HGNC Symbol;Acc:10315]	structural constituent of ribosome,ribosome,translation,RNA binding,ribonucleoprotein complex,cytosolic large ribosomal subunit,RNA metabolic process,mRNA metabolic process,translational elongation,translational initiation,nuclear-transcribed mRNA catabolic process, nonsense-mediated decay,translational termination	1	0	1
RPL5	ribosomal protein L5 [Source:HGNC Symbol;Acc:10360]	structural constituent of ribosome,5S rRNA binding,ribosome,translation,RNA binding,ribonucleoprotein complex,cytosolic large ribosomal subunit,RNA metabolic process,mRNA metabolic process,rRNA processing,ribosomal large subunit biogenesis,translational elongation,translational initiation,nuclear-transcribed mRNA catabolic process, nonsense-mediated decay,translational termination	1	0	1
RPS3	ribosomal protein S3 [Source:HGNC Symbol;Acc:10420]	RNA binding,structural constituent of ribosome,ribosome,translation,mRNA binding,cytosolic small ribosomal subunit,ribonucleoprotein complex,small ribosomal subunit,RNA metabolic process,mRNA metabolic process,translational elongation,translational initiation,nuclear-transcribed mRNA catabolic process, nonsense-mediated decay,translational termination	1	0	1
CNOT1	CCR4-NOT transcription complex, subunit 1 [Source:HGNC Symbol;Acc:7877]	poly(A)-specific ribonuclease activity,cytoplasmic mRNA processing body,RNA metabolic process,mRNA metabolic process,nuclear-transcribed mRNA catabolic process, deadenylation-dependent decay,nuclear-transcribed mRNA poly(A) tail shortening,regulation of translation,positive regulation of cytoplasmic mRNA processing body assembly,gene silencing by RNA,positive regulation of nuclear-transcribed mRN…	0	0	1
RPS13	ribosomal protein S13 [Source:HGNC Symbol;Acc:10386]	structural constituent of ribosome,ribosome,translation,mRNA binding,cytosolic small ribosomal subunit,RNA metabolic process,mRNA metabolic process,translational elongation,translational initiation,nuclear-transcribed mRNA catabolic process, nonsense-mediated decay,negative regulation of RNA splicing,translational termination	0	0	1
RPS2	ribosomal protein S2 [Source:HGNC Symbol;Acc:10404]	structural constituent of ribosome,ribosome,translation,RNA binding,small ribosomal subunit,mRNA binding,cytosolic small ribosomal subunit,RNA metabolic process,mRNA metabolic process,translational elongation,translational initiation,nuclear-transcribed mRNA catabolic process, nonsense-mediated decay,translational termination	0	0	1
RPS9	ribosomal protein S9 [Source:HGNC Symbol;Acc:10442]	RNA binding,structural constituent of ribosome,rRNA binding,translation regulator activity,cytosolic small ribosomal subunit,ribosome,ribonucleoprotein complex,small ribosomal subunit,translation,RNA metabolic process,mRNA metabolic process,regulation of translation,translational elongation,translational initiation,nuclear-transcribed mRNA catabolic process, nonsense-mediated decay,translational …	0	0	1
RPSA	ribosomal protein SA [Source:HGNC Symbol;Acc:6502]	structural constituent of ribosome,ribosome binding,cytosolic small ribosomal subunit,ribosome,small ribosomal subunit,90S preribosome,ribosomal small subunit assembly,translation,RNA metabolic process,mRNA metabolic process,translational elongation,translational initiation,nuclear-transcribed mRNA catabolic process, nonsense-mediated decay,endonucleolytic cleavage in ITS1 to separate SSU-rRNA fr…	0	0	1
SNRNP200	small nuclear ribonucleoprotein 200kDa (U5) [Source:HGNC Symbol;Acc:30859]	ribonucleoprotein complex,ATP-dependent RNA helicase activity,spliceosomal complex,catalytic step 2 spliceosome,U5 snRNP,RNA splicing,mRNA splicing, via spliceosome,cis assembly of pre-catalytic spliceosome	0	0	1
SNRNP40	small nuclear ribonucleoprotein 40kDa (U5) [Source:HGNC Symbol;Acc:30857]	small nucleolar ribonucleoprotein complex,catalytic step 2 spliceosome,U5 snRNP,RNA splicing,mRNA splicing, via spliceosome,RNA processing,RNA splicing, via transesterification reactions	0	0	1
SNRPD2	small nuclear ribonucleoprotein D2 polypeptide 16.5kDa [Source:HGNC Symbol;Acc:11159]	small nuclear ribonucleoprotein complex,RNA splicing,spliceosomal complex,U12-type spliceosomal complex,catalytic step 2 spliceosome,RNA metabolic process,mRNA splicing, via spliceosome,spliceosomal complex assembly,spliceosomal snRNP assembly,ncRNA metabolic process	0	0	1
XPO1	exportin 1 (CRM1 homolog, yeast) [Source:HGNC Symbol;Acc:12825]	RNA binding,ribonucleoprotein complex,RNA metabolic process,mRNA metabolic process,mRNA transport	0	0	1
XPOT	exportin, tRNA [Source:HGNC Symbol;Acc:12826]	tRNA binding,tRNA export from nucleus	0	0	1
HNRNPA1	heterogeneous nuclear ribonucleoprotein A1 [Source:HGNC Symbol;Acc:5031]	alternative mRNA splicing, via spliceosome,RNA binding,single-stranded RNA binding,spliceosomal complex,ribonucleoprotein complex,catalytic step 2 spliceosome,mRNA processing,RNA splicing,mRNA transport,mRNA splicing, via spliceosome,RNA export from nucleus	1	1	0
HNRNPA3	heterogeneous nuclear ribonucleoprotein A3 [Source:HGNC Symbol;Acc:24941]	RNA binding,ribonucleoprotein complex,catalytic step 2 spliceosome,RNA splicing,mRNA splicing, via spliceosome	1	1	0
HNRNPH2	heterogeneous nuclear ribonucleoprotein H2 (H') [Source:HGNC Symbol;Acc:5042]	RNA binding,ribonucleoprotein complex,RNA splicing,mRNA splicing, via spliceosome	1	1	0
NOP2	NOP2 nucleolar protein [Source:HGNC Symbol;Acc:7867]	RNA binding,rRNA processing	1	1	0
PRPF38A	PRP38 pre-mRNA processing factor 38 (yeast) domain containing A [Source:HGNC Symbol;Acc:25930]	spliceosomal complex,mRNA processing,RNA splicing	1	1	0
PRPF40A	PRP40 pre-mRNA processing factor 40 homolog A (S. cerevisiae) [Source:HGNC Symbol;Acc:16463]	mRNA processing,RNA splicing	1	1	0
PRPF4B	PRP4 pre-mRNA processing factor 4 homolog B (yeast) [Source:HGNC Symbol;Acc:17346]	catalytic step 2 spliceosome,RNA splicing,mRNA splicing, via spliceosome	1	1	0
RPL6	ribosomal protein L6 [Source:HGNC Symbol;Acc:10362]	structural constituent of ribosome,ribosome,translation,RNA binding,cytosolic large ribosomal subunit,RNA metabolic process,mRNA metabolic process,translational elongation,translational initiation,nuclear-transcribed mRNA catabolic process, nonsense-mediated decay,translational termination	1	1	0
RRP1	ribosomal RNA processing 1 homolog (S. cerevisiae) [Source:HGNC Symbol;Acc:18785]	preribosome, small subunit precursor,rRNA processing	1	1	0
RRP1B	ribosomal RNA processing 1 homolog B (S. cerevisiae) [Source:HGNC Symbol;Acc:23818]	preribosome, small subunit precursor,rRNA processing	1	1	0
RRS1	RRS1 ribosome biogenesis regulator homolog (S. cerevisiae) [Source:HGNC Symbol;Acc:17083]	ribosome biogenesis	1	1	0
SF3A3	splicing factor 3a, subunit 3, 60kDa [Source:HGNC Symbol;Acc:10767]	spliceosomal complex,catalytic step 2 spliceosome,mRNA processing,RNA splicing,mRNA splicing, via spliceosome,RNA splicing, via transesterification reactions,mRNA 3'-splice site recognition	1	1	0
CNOT3	CCR4-NOT transcription complex, subunit 3 [Source:HGNC Symbol;Acc:7879]	cytoplasmic mRNA processing body,RNA metabolic process,mRNA metabolic process,nuclear-transcribed mRNA catabolic process, deadenylation-dependent decay,nuclear-transcribed mRNA poly(A) tail shortening,regulation of translation,gene silencing by RNA	0	1	0
POLR1E	polymerase (RNA) I polypeptide E, 53kDa [Source:HGNC Symbol;Acc:17631]	rRNA transcription	0	1	0
POLR2D	polymerase (RNA) II (DNA directed) polypeptide D [Source:HGNC Symbol;Acc:9191]	RNA splicing,mRNA splicing, via spliceosome,7-methylguanosine mRNA capping	0	1	0
POLR2E	polymerase (RNA) II (DNA directed) polypeptide E, 25kDa [Source:HGNC Symbol;Acc:9192]	RNA splicing,mRNA splicing, via spliceosome,7-methylguanosine mRNA capping	0	1	0
POLR2J	polymerase (RNA) II (DNA directed) polypeptide J, 13.3kDa [Source:HGNC Symbol;Acc:9197]	RNA splicing,mRNA splicing, via spliceosome,7-methylguanosine mRNA capping	0	1	0
PRPF38B	PRP38 pre-mRNA processing factor 38 (yeast) domain containing B [Source:HGNC Symbol;Acc:25512]	spliceosomal complex,mRNA processing,RNA splicing	0	1	0
PRPF4	PRP4 pre-mRNA processing factor 4 homolog (yeast) [Source:HGNC Symbol;Acc:17349]	spliceosomal complex,U4/U6 snRNP,RNA splicing,mRNA splicing, via spliceosome,RNA processing,RNA splicing, via transesterification reactions	0	1	0
RPL26	ribosomal protein L26 [Source:HGNC Symbol;Acc:10327]	structural constituent of ribosome,large ribosomal subunit,translation,RNA binding,cytosolic large ribosomal subunit,RNA metabolic process,mRNA metabolic process,rRNA processing,ribosomal large subunit biogenesis,translational elongation,translational initiation,nuclear-transcribed mRNA catabolic process, nonsense-mediated decay,translational termination	0	1	0
RPS19BP1	ribosomal protein S19 binding protein 1 [Source:HGNC Symbol;Acc:28749]	.	0	1	0
RRP9	ribosomal RNA processing 9, small subunit (SSU) processome component, homolog (yeast) [Source:HGNC Symbol;Acc:16829]	RNA binding,small nuclear ribonucleoprotein complex,small nucleolar ribonucleoprotein complex,rRNA processing	0	1	0
SF3A2	splicing factor 3a, subunit 2, 66kDa [Source:HGNC Symbol;Acc:10766]	spliceosomal complex,small nuclear ribonucleoprotein complex,catalytic step 2 spliceosome,mRNA processing,RNA splicing,mRNA splicing, via spliceosome,mRNA 3'-splice site recognition	0	1	0
SF3B5	splicing factor 3b, subunit 5, 10kDa [Source:HGNC Symbol;Acc:21083]	U12-type spliceosomal complex,RNA splicing,mRNA splicing, via spliceosome	0	1	0
SNRNP70	small nuclear ribonucleoprotein 70kDa (U1) [Source:HGNC Symbol;Acc:11150]	RNA binding,spliceosomal complex,mRNA processing,RNA splicing,mRNA splicing, via spliceosome,regulation of RNA splicing	0	1	0
SNRPB2	small nuclear ribonucleoprotein polypeptide B [Source:HGNC Symbol;Acc:11155]	snRNA binding,spliceosomal complex,U2 snRNP,catalytic step 2 spliceosome,mRNA processing,RNA splicing,mRNA splicing, via spliceosome	0	1	0
GAR1	GAR1 ribonucleoprotein homolog (yeast) [Source:HGNC Symbol;Acc:14264]	RNA binding,box H/ACA snoRNP complex,ribosome biogenesis,rRNA processing	1	0	0
HNRNPF	heterogeneous nuclear ribonucleoprotein F [Source:HGNC Symbol;Acc:5039]	RNA binding,single-stranded RNA binding,catalytic step 2 spliceosome,RNA splicing,mRNA splicing, via spliceosome,RNA processing,regulation of RNA splicing	1	0	0
NOP14	NOP14 nucleolar protein [Source:HGNC Symbol;Acc:16821]	snoRNA binding,90S preribosome,rRNA processing,endonucleolytic cleavage in ITS1 to separate SSU-rRNA from 5.8S rRNA and LSU-rRNA from tricistronic rRNA transcript (SSU-rRNA, 5.8S rRNA, LSU-rRNA),endonucleolytic cleavage to generate mature 5'-end of SSU-rRNA from (SSU-rRNA, 5.8S rRNA, LSU-rRNA),endonucleolytic cleavage in 5'-ETS of tricistronic rRNA transcript (SSU-rRNA, 5.8S rRNA, LSU-rRNA),ribos…	1	0	0
NOP16	NOP16 nucleolar protein [Source:HGNC Symbol;Acc:26934]	.	1	0	0
RPL13	ribosomal protein L13 [Source:HGNC Symbol;Acc:10303]	RNA binding,structural constituent of ribosome,ribosome,cytosolic large ribosomal subunit,cytosolic ribosome,translation,RNA metabolic process,mRNA metabolic process,translational elongation,translational initiation,nuclear-transcribed mRNA catabolic process, nonsense-mediated decay,translational termination	1	0	0
RPL31	ribosomal protein L31 [Source:HGNC Symbol;Acc:10334]	structural constituent of ribosome,ribosome,translation,RNA binding,cytosolic large ribosomal subunit,RNA metabolic process,mRNA metabolic process,translational elongation,translational initiation,nuclear-transcribed mRNA catabolic process, nonsense-mediated decay,translational termination	1	0	0
RPL4	ribosomal protein L4 [Source:HGNC Symbol;Acc:10353]	structural constituent of ribosome,ribosome,translation,RNA binding,ribonucleoprotein complex,cytosolic large ribosomal subunit,RNA metabolic process,mRNA metabolic process,translational elongation,translational initiation,nuclear-transcribed mRNA catabolic process, nonsense-mediated decay,translational termination	1	0	0
RPS10	ribosomal protein S10 [Source:HGNC Symbol;Acc:10383]	cytosolic small ribosomal subunit,ribosome,translation,RNA metabolic process,mRNA metabolic process,translational elongation,translational initiation,nuclear-transcribed mRNA catabolic process, nonsense-mediated decay,translational termination	1	0	0
RPS14	ribosomal protein S14 [Source:HGNC Symbol;Acc:10387]	RNA binding,structural constituent of ribosome,translation regulator activity,mRNA 5'-UTR binding,cytosolic small ribosomal subunit,ribosome,ribosomal small subunit assembly,translation,RNA metabolic process,mRNA metabolic process,regulation of translation,translational elongation,translational initiation,nuclear-transcribed mRNA catabolic process, nonsense-mediated decay,translational terminatio…	1	0	0
RRP12	ribosomal RNA processing 12 homolog (S. cerevisiae) [Source:HGNC Symbol;Acc:29100]	.	1	0	0
RRP36	ribosomal RNA processing 36 homolog (S. cerevisiae) [Source:HGNC Symbol;Acc:21374]	rRNA processing,ribosomal small subunit biogenesis	1	0	0
RRP8	ribosomal RNA processing 8, methyltransferase, homolog (yeast) [Source:HGNC Symbol;Acc:29030]	rRNA processing	1	0	0
SF3B4	splicing factor 3b, subunit 4, 49kDa [Source:HGNC Symbol;Acc:10771]	RNA binding,spliceosomal complex,U12-type spliceosomal complex,mRNA processing,RNA splicing,mRNA splicing, via spliceosome,RNA splicing, via transesterification reactions	1	0	0
SNRPG	small nuclear ribonucleoprotein polypeptide G [Source:HGNC Symbol;Acc:11163]	RNA binding,spliceosomal complex,small nuclear ribonucleoprotein complex,U12-type spliceosomal complex,catalytic step 2 spliceosome,U7 snRNP,RNA metabolic process,RNA splicing,mRNA splicing, via spliceosome,spliceosomal complex assembly,mRNA 3'-end processing,spliceosomal snRNP assembly,ncRNA metabolic process,histone mRNA metabolic process	1	0	0
DARS2	aspartyl-tRNA synthetase 2, mitochondrial [Source:HGNC Symbol;Acc:25538]	aminoacyl-tRNA ligase activity,tRNA aminoacylation for protein translation,tRNA binding,aspartate-tRNA ligase activity,tRNA aminoacylation,mitochondrial asparaginyl-tRNA aminoacylation	0	0	0
IPO13	importin 13 [Source:HGNC Symbol;Acc:16853]	.	0	0	0
IPO5	importin 5 [Source:HGNC Symbol;Acc:6402]	ribosomal protein import into nucleus	0	0	0
IPO8	importin 8 [Source:HGNC Symbol;Acc:9853]	.	0	0	0
NARS2	asparaginyl-tRNA synthetase 2, mitochondrial (putative) [Source:HGNC Symbol;Acc:26274]	aminoacyl-tRNA ligase activity,asparagine-tRNA ligase activity,tRNA aminoacylation for protein translation,asparaginyl-tRNA aminoacylation	0	0	0
NOP10	NOP10 ribonucleoprotein [Source:HGNC Symbol;Acc:14378]	snoRNA binding,small nucleolar ribonucleoprotein complex,box H/ACA RNP complex,ribosome biogenesis,rRNA processing	0	0	0
PIH1D1	PIH1 domain containing 1 [Source:HGNC Symbol;Acc:26075]	pre-snoRNP complex,box C/D snoRNP assembly	0	0	0
PRPF18	PRP18 pre-mRNA processing factor 18 homolog (S. cerevisiae) [Source:HGNC Symbol;Acc:17351]	RNA splicing,spliceosomal complex,mRNA processing	0	0	0
PRPF39	PRP39 pre-mRNA processing factor 39 homolog (S. cerevisiae) [Source:HGNC Symbol;Acc:20314]	mRNA processing,RNA splicing,RNA processing	0	0	0
PRPF40B	PRP40 pre-mRNA processing factor 40 homolog B (S. cerevisiae) [Source:HGNC Symbol;Acc:25031]	mRNA processing,RNA splicing	0	0	0
RPL10	ribosomal protein L10 [Source:HGNC Symbol;Acc:10298]	structural constituent of ribosome,ribosome,cytosolic large ribosomal subunit,translation,RNA metabolic process,mRNA metabolic process,translational elongation,translational initiation,nuclear-transcribed mRNA catabolic process, nonsense-mediated decay,translational termination	0	0	0
RPL10L	ribosomal protein L10-like [Source:HGNC Symbol;Acc:17976]	structural constituent of ribosome,ribosome,cytosolic large ribosomal subunit,translation	0	0	0
RPL11	ribosomal protein L11 [Source:HGNC Symbol;Acc:10301]	structural constituent of ribosome,ribosome,translation,RNA binding,rRNA binding,cytosolic large ribosomal subunit,RNA metabolic process,mRNA metabolic process,rRNA processing,ribosomal large subunit biogenesis,translational elongation,translational initiation,nuclear-transcribed mRNA catabolic process, nonsense-mediated decay,translational termination	0	0	0
RPL17	ribosomal protein L17 [Source:HGNC Symbol;Acc:10307]	structural constituent of ribosome,ribosome,cytosolic large ribosomal subunit,large ribosomal subunit,translation,RNA metabolic process,mRNA metabolic process,translational elongation,translational initiation,nuclear-transcribed mRNA catabolic process, nonsense-mediated decay,translational termination	0	0	0
RPL18	ribosomal protein L18 [Source:HGNC Symbol;Acc:10310]	structural constituent of ribosome,ribosome,translation,RNA binding,cytosolic large ribosomal subunit,RNA metabolic process,mRNA metabolic process,translational elongation,translational initiation,nuclear-transcribed mRNA catabolic process, nonsense-mediated decay,translational termination	0	0	0
RPL19	ribosomal protein L19 [Source:HGNC Symbol;Acc:10312]	structural constituent of ribosome,ribosome,translation,cytosolic large ribosomal subunit,RNA binding,RNA metabolic process,mRNA metabolic process,translational elongation,translational initiation,nuclear-transcribed mRNA catabolic process, nonsense-mediated decay,translational termination	0	0	0
RPL23	ribosomal protein L23 [Source:HGNC Symbol;Acc:10316]	structural constituent of ribosome,ribosome,translation,cytosolic large ribosomal subunit,RNA metabolic process,mRNA metabolic process,ribosomal protein import into nucleus,translational elongation,translational initiation,nuclear-transcribed mRNA catabolic process, nonsense-mediated decay,translational termination	0	0	0
RPL30	ribosomal protein L30 [Source:HGNC Symbol;Acc:10333]	structural constituent of ribosome,ribosome,translation,RNA binding,cytosolic large ribosomal subunit,RNA metabolic process,mRNA metabolic process,translational elongation,translational initiation,nuclear-transcribed mRNA catabolic process, nonsense-mediated decay,translational termination	0	0	0
RPL36AL	ribosomal protein L36a-like [Source:HGNC Symbol;Acc:10346]	structural constituent of ribosome,ribosome,translation	0	0	0
RPL7A	ribosomal protein L7a [Source:HGNC Symbol;Acc:10364]	ribosome,ribosome biogenesis,RNA binding,structural constituent of ribosome,cytosolic large ribosomal subunit,polysomal ribosome,translation,RNA metabolic process,mRNA metabolic process,translational elongation,translational initiation,nuclear-transcribed mRNA catabolic process, nonsense-mediated decay,translational termination	0	0	0
RPP14	ribonuclease P/MRP 14kDa subunit [Source:HGNC Symbol;Acc:30327]	RNA binding,ribonuclease activity,ribonuclease P activity,tRNA processing	0	0	0
RPP21	ribonuclease P/MRP 21kDa subunit [Source:HGNC Symbol;Acc:21300]	ribonuclease P activity,tRNA processing	0	0	0
RPP25	ribonuclease P/MRP 25kDa subunit [Source:HGNC Symbol;Acc:30361]	RNA binding,ribonuclease P activity,tRNA processing	0	0	0
RPP25L	ribonuclease P/MRP 25kDa subunit-like [Source:HGNC Symbol;Acc:19909]	.	0	0	0
RPP38	ribonuclease P/MRP 38kDa subunit [Source:HGNC Symbol;Acc:30329]	ribonuclease P activity,nucleolar ribonuclease P complex,tRNA processing	0	0	0
RPP40	ribonuclease P/MRP 40kDa subunit [Source:HGNC Symbol;Acc:20992]	ribonuclease P activity,nucleolar ribonuclease P complex,tRNA processing	0	0	0
RPS15	ribosomal protein S15 [Source:HGNC Symbol;Acc:10388]	structural constituent of ribosome,ribosome,translation,RNA binding,small ribosomal subunit,cytosolic small ribosomal subunit,RNA metabolic process,mRNA metabolic process,rRNA processing,translational elongation,translational initiation,nuclear-transcribed mRNA catabolic process, nonsense-mediated decay,translational termination,ribosomal small subunit biogenesis,ribosomal small subunit export fr…	0	0	0
RPS19	ribosomal protein S19 [Source:HGNC Symbol;Acc:10402]	structural constituent of ribosome,ribosome,translation,cytosolic small ribosomal subunit,ribosomal small subunit assembly,RNA metabolic process,mRNA metabolic process,rRNA processing,translational elongation,translational initiation,nuclear-transcribed mRNA catabolic process, nonsense-mediated decay,translational termination,ribosomal small subunit biogenesis,maturation of SSU-rRNA from tricistr…	0	0	0
RPS25	ribosomal protein S25 [Source:HGNC Symbol;Acc:10413]	RNA binding,structural constituent of ribosome,cytosolic small ribosomal subunit,ribosome,small ribosomal subunit,ribosomal small subunit assembly,translation,RNA metabolic process,mRNA metabolic process,translational elongation,translational initiation,nuclear-transcribed mRNA catabolic process, nonsense-mediated decay,translational termination	0	0	0
RPS27A	ribosomal protein S27a [Source:HGNC Symbol;Acc:10417]	structural constituent of ribosome,cytosolic small ribosomal subunit,ribosome,small ribosomal subunit,translation,RNA metabolic process,mRNA metabolic process,translational elongation,translational initiation,nuclear-transcribed mRNA catabolic process, nonsense-mediated decay,translational termination	0	0	0
RPS27L	ribosomal protein S27-like [Source:HGNC Symbol;Acc:18476]	structural constituent of ribosome,ribosome,translation,cytosolic small ribosomal subunit,translation activator activity,positive regulation of translation	0	0	0
RPS6	ribosomal protein S6 [Source:HGNC Symbol;Acc:10429]	structural constituent of ribosome,ribosome,translation,cytosolic small ribosomal subunit,ribosomal small subunit assembly,ribonucleoprotein complex,small ribosomal subunit,RNA metabolic process,mRNA metabolic process,rRNA processing,translational elongation,translational initiation,nuclear-transcribed mRNA catabolic process, nonsense-mediated decay,translational termination,ribosomal small subun…	0	0	0
RPS7	ribosomal protein S7 [Source:HGNC Symbol;Acc:10440]	RNA binding,structural constituent of ribosome,cytosolic small ribosomal subunit,ribosome,ribonucleoprotein complex,90S preribosome,translation,RNA metabolic process,mRNA metabolic process,rRNA processing,translational elongation,translational initiation,nuclear-transcribed mRNA catabolic process, nonsense-mediated decay,translational termination,ribosomal small subunit biogenesis	0	0	0
RRP7A	ribosomal RNA processing 7 homolog A (S. cerevisiae) [Source:HGNC Symbol;Acc:24286]	RNA binding	0	0	0
RSL24D1	ribosomal L24 domain containing 1 [Source:HGNC Symbol;Acc:18479]	ribosome biogenesis	0	0	0
SARS	seryl-tRNA synthetase [Source:HGNC Symbol;Acc:10537]	aminoacyl-tRNA ligase activity,serine-tRNA ligase activity,tRNA aminoacylation for protein translation,seryl-tRNA aminoacylation,RNA binding,translation,tRNA processing	0	0	0
SHQ1	SHQ1, H/ACA ribonucleoprotein assembly factor [Source:HGNC Symbol;Acc:25543]	ribonucleoprotein complex assembly,negative regulation of rRNA processing	0	0	0
TAF9	TAF9 RNA polymerase II, TATA box binding protein (TBP)-associated factor, 32kDa [Source:HGNC Symbol;Acc:11542]	pre-snoRNP complex	0	0	0
TARSL2	threonyl-tRNA synthetase-like 2 [Source:HGNC Symbol;Acc:24728]	threonine-tRNA ligase activity,aminoacyl-tRNA ligase activity,ligase activity, forming aminoacyl-tRNA and related compounds,threonyl-tRNA aminoacylation,tRNA aminoacylation for protein translation,tRNA aminoacylation	0	0	0
WARS	tryptophanyl-tRNA synthetase [Source:HGNC Symbol;Acc:12729]	aminoacyl-tRNA ligase activity,tRNA aminoacylation for protein translation,tryptophan-tRNA ligase activity,tryptophanyl-tRNA aminoacylation,translation	0	0	0
XPO4	exportin 4 [Source:HGNC Symbol;Acc:17796]	.	0	0	0
XPO6	exportin 6 [Source:HGNC Symbol;Acc:19733]	.	0	0	0
XPO7	exportin 7 [Source:HGNC Symbol;Acc:14108]	mRNA transport	0	0	0
YARS2	tyrosyl-tRNA synthetase 2, mitochondrial [Source:HGNC Symbol;Acc:24249]	aminoacyl-tRNA ligase activity,tyrosine-tRNA ligase activity,tRNA aminoacylation for protein translation,tyrosyl-tRNA aminoacylation,tRNA binding,translation,tRNA aminoacylation,mitochondrial tyrosyl-tRNA aminoacylation	0	0	0

## Sheet: Tab 3. Column definition
Associated Tabs	Column name	Column definition
1, 2	Gene symbol	Gene symbols and synonyms
	Protein name	Protein name
	GO molecular function	The GO molecular function terms. N/A indicates not available.
1	Uniprot accession	Uniprot accesion IDs for the protein group
	GO cellular component	The GO cellular component terms. N/A indicates not available.
	OOPS (Queiroz, R.M.L., et al. Nat. Biotech. 2019)	The RBPs identified by OOPS in Queiroz, R.M.L., et al. Nat. Biotech. 2019. 1 if yes, 0 if no.
	OligodT pulldown (Queiroz, RML., et al Nat. Biotech. 2019)	The RBPs identified by oligodT pulldown in Queiroz, R.M.L., et al. Nat. Biotech. 2019. 1 if yes, 0 if no.
	XRANX (Trendel J.,et al. Cell. 2019)	The RBPs identified by XRANX in Trendel J.,et al. Cell. 2019. 1 if yes, 0 if no.
	OligodT Pulldown (Baltz AG.,et al. Mol Cell.2012)	The RBPs identified by oligodT pulldown in Baltz AG.,et al. Mol Cell.2012. 1 if yes, 0 if no.
	CARIC (Huang R.,et al. PNAS.2019)	The RBPs identified by CARIC in Huang R.,et al. PNAS.2019. 1 if yes, 0 if no.
	GO RNA binding	The RBPs annotated by GO. 1 if yes, 0 if no.
	SerIC nucleus	The nuclear RBPs identified by SerIC in Conrad T., et al. Nat. Commun. 2016. 1 if yes, 0 if no.
	RBD map (Castello A., et al. Mol Cell. 2016)	The RBPs identified by OligodT based RBD profiling in Castello A., et al. Mol Cell. 2016. 1 if yes, 0 if no.
	OligodT Pulldown (Castello A., et al. Cell. 2012)	The RBPs identified by oligodT pulldown in Castello A., et al. Cell. 2012. 1 if yes, 0 if no.
	OligodT Pulldown (Milek M, et al. Genome Res. 2017)	The RBPs identified by oligodT pulldown in Milek M, et al. Genome Res. 2017. 1 if yes, 0 if no.
	known RBP	The RBPs identified by at least one RBP dataset.
	polyA RBP	The RBPs identified by at least one RBP dataset.
	RNA types	The RBPs with information about the RNA types according to the literature. N/A indicates not available.
	Ratio (+FA vs -FA), log2	The mean TMT ratio of FA crosslinking samples compared to the non-crosslinking samples.
	RNA binding affinity	The assignment of RBPs with high and moderate RNA binding affinity according to the ROC cutoff. High if lower than the cutoff value, moderate if higher than the cutoff value.
	Domain 1	The first domain of RBP. N/A indicates not available.
	Domain 2	The second domain of RBP. N/A indicates not available.
	Domain 3	The third domain of RBP. N/A indicates not available.
	Domain 4	The fourth domain of RBP. N/A indicates not available.
	Domain 5	The fifth domain of RBP. N/A indicates not available.
	Domain 6	The sixth domain of RBP. N/A indicates not available.
	Domain 7	The seventh domain of RBP. N/A indicates not available.
	Domain 8	The eighth domain of RBP. N/A indicates not available.
2	SerIC	The gold standard RBPs identified by SerIC. 1 if yes, 0 if no.
	RBR-IR	The gold standard RBPs identified by RBR-ID. 1 if yes, 0 if no.
	APEX-PS	The gold standard RBPs identified by APEX-PS. 1 if yes, 0 if no.

## Sheet: Tab 4. Table legend
Supplementary Dataset 2. The list of nuclear RBPs. The nuclear RBPs are listed in Tab 1, and compared with 10 different RBP datasets. The RBPs identified by at least one dataset were assigned as known RBPs and the remaining ones were assigned as RBP orphans. The RBPs identified by oligodT pulldown based methods are assigned as poly (A) RBPs and the remaining ones are assigned as non-poly (A) RBPs…
