# Supplementary material for: Functional proximity mapping of RNA binding proteins uncovers a mitochondrial mRNA anchor that promotes stress recovery
Source: Research Square preprint supplement (doi:10.21203/rs.3.rs-103196/v1), 2020-11-12
Supplement: Supplementary file 3 [file 97a7771678aef32a10827e28.xlsx]

## Sheet: Tab 1. SYNJ2BP RIP-seq
Gene symbol	Description	Gene_id	Locus	SYNJ2BP IP_FPKM	IgG_FPKM	Fold change
UQCR11	ubiquinol-cytochrome c reductase, complex III subunit XI	ENSG00000267059	chr19:1576638-1605480	6.63799	6.00131e-276	1.10638e+276
RP11-977G19.10		ENSG00000144785	chr12:56665482-56727837	5.76157	1.07863e-191	5.34331e+191
MSH5-SAPCD1	MSH5-SAPCD1 readthrough (NMD candidate)	ENSG00000255152	chr6:31707724-31733365	0.949958	1.09066e-183	8.7125e+182
MTFP1	mitochondrial fission process 1	ENSG00000242114	chr22:30727976-30825045	5.10051	2.71205e-181	1.88037e+181
COG8	component of oligomeric golgi complex 8	ENSG00000213380	chr16:69139466-69442474	12.601	1.84721e-179	6.82047e+179
ZNF709	zinc finger protein 709	ENSG00000196826	chr19:12490002-12750912	1.30223	1.14608e-153	1.13603e+153
RP11-196G11.1		ENSG00000255439	chr16:31085742-31107301	26.2825	6.43193e-121	4.08603e+121
GDF1	growth differentiation factor 1	ENSG00000130283	chr19:18979360-19007536	3.29084	1.39832e-105	2.35308e+105
RP11-343C2.12		ENSG00000272617	chr16:69139466-69442474	14.1986	8.76851e-88	1.61925e+88
FLJ00104		ENSG00000205047	chr16:87634131-87799598	1.19371	1.30714e-86	9.13315e+85
C17orf80	chromosome 17 open reading frame 80	ENSG00000141219	chr17:71161115-71258491	17.1141	1.39263e-72	1.2288e+73
NAA60	N(alpha)-acetyltransferase 60, NatF catalytic subunit	ENSG00000262621	chr16:3415098-3627401	0.904513	6.91011e-40	1.30931e+39
RP11-1035H13.3		ENSG00000260342	chr16:18792616-18813000	26.8401	3.28653e-28	8.16647e+28
CCDC3	coiled-coil domain containing 3	ENSG00000151468	chr10:12938624-13180291	11.5657	6.13245e-27	1.88602e+27
RP4-583P15.15		ENSG00000273154	chr20:62289162-62374858	0.748607	5.89674e-24	1.26949e+23
PET117	PET117 homolog	ENSG00000232838	chr20:18118516-18169031	7.6293	1.95763e-21	3.89712e+21
RAB5IF	chromosome 20 open reading frame 24	ENSG00000101084	chr20:34894257-35274619	2.07935	3.5281e-21	5.89355e+20
CSNK1G1	casein kinase 1 gamma 1	ENSG00000169118	chr15:64457715-64679886	5.00072	6.21887e-17	8.04142e+16
RP11-544M22.13		ENSG00000270149	chr1:160965000-161008780	3.02204	4.91673e-16	6146557285640000
MRPS17	mitochondrial ribosomal protein S17	ENSG00000249773	chr7:55954969-56067874	8.36407	5.90279e-14	141696750298000
HOXD11	homeobox D11	ENSG00000128713	chr2:176968943-176984670	9.8294	2.31028e-12	4254716074740
BROX	BRO1 domain and CAAX motif containing	ENSG00000162819	chr1:222841354-222946483	6.40198	1.56011e-10	4.10368e+10
ZSCAN23	zinc finger and SCAN domain containing 23	ENSG00000187987	chr6:28393286-28411279	25.5597	2.31586e-09	1.10368e+10
TMEM50A	transmembrane protein 50A	ENSG00000183726	chr1:25568727-25756683	13.5481	1.85359e-09	7.30886e+09
PCDHGB3	protocadherin gamma subfamily B, 3	ENSG00000262209	chr5:140710251-140892546	4.32082	6.15076e-10	7.02475e+09
ARMCX5	armadillo repeat containing, X-linked 5	ENSG00000125962	chrX:101854095-101973607	10.5981	2.32276e-09	4.56257e+09
RP11-244H3.4		ENSG00000271741	chr1:35439956-35497569	12.2772	5.46959e-09	2.24458e+09
PCDHGC5	protocadherin gamma subfamily C, 5	ENSG00000240764	chr5:140710251-140892546	1.48951	7.29004e-10	2.04322e+09
FBXO16	F-box protein 16	ENSG00000214050	chr8:28203101-28347835	16.2366	1.44478e-08	1.12385e+09
ERCC5	excision repair cross-complementation group 5	ENSG00000134899	chr13:103451398-103528345	35.9442	4.31231e-08	8.33554e+08
TRIT1	tRNA isopentenyltransferase 1	ENSG00000043514	chr1:40306705-40349183	64.3771	8.51124e-08	7.56361e+08
PHLPP2	PH domain and leucine rich repeat protein phosphatase 2	ENSG00000040199	chr16:71657610-71758604	9.85479	2.58521e-07	3.81188e+07
BET1L	Bet1 golgi vesicular membrane trafficking protein like	ENSG00000177951	chr11:120810-207428	10.7706	4.14329e-07	2.59944e+07
PDPR	pyruvate dehydrogenase phosphatase regulatory subunit	ENSG00000090857	chr16:70147528-70221264	13.5535	9.72359e-07	1.39388e+07
SULT4A1	sulfotransferase family 4A member 1	ENSG00000130540	chr22:44220386-44258398	17.9066	2.22494e-06	8.04801e+06
TNS3	tensin 3	ENSG00000136205	chr7:47314751-47622156	9.15739	1.15692e-06	7.91523e+06
NFKBIL1	NFKB inhibitor like 1	ENSG00000204498	chr6:31496493-31527677	21.1536	4.10787e-06	5.1495e+06
HLA-A	major histocompatibility complex, class I, A	ENSG00000206503	chr6:29867167-29913661	1.59525	5.07113e-07	3.14581e+06
OCLN	occludin	ENSG00000197822	chr5:68773298-69006341	22.4058	7.45791e-06	3.00431e+06
MAST2	microtubule associated serine/threonine kinase 2	ENSG00000086015	chr1:46252658-46501796	29.4505	1.38569e-05	2.1254e+06
CTSZ	cathepsin Z	ENSG00000101160	chr20:57570239-57582302	16.4355	1.49388e-05	1.10017e+06
ARHGAP42	Rho GTPase activating protein 42	ENSG00000165895	chr11:100554892-100862668	6.99259	6.46113e-06	1.08225e+06
SLMO1		ENSG00000141391	chr18:12407894-12432237	1.22339	1.36397e-06	896908
RP6-24A23.6		ENSG00000260548	chrX:107963178-107982133	9.09262	1.07958e-05	842256
ACSS1	acyl-CoA synthetase short-chain family member 1	ENSG00000154930	chr20:24986867-25039616	7.69691	1.22312e-05	629305
ZCCHC3	zinc finger CCHC-type containing 3	ENSG00000177764	chr20:277736-280965	4.29771	8.10296e-06	530392
LSM11	LSM11, U7 small nuclear RNA associated	ENSG00000155858	chr5:157170702-157187717	2.35044	6.40231e-06	367122
IFITM1	interferon induced transmembrane protein 1	ENSG00000185885	chr11:307630-315272	2.72169	9.55261e-06	284921
CREBL2	cAMP responsive element binding protein-like 2	ENSG00000111269	chr12:12764760-12798042	14.6121	5.81434e-05	251309
KCTD9	potassium channel tetramerization domain containing 9	ENSG00000104756	chr8:25285363-25315992	1.91072	7.84725e-06	243489
FGF11	fibroblast growth factor 11	ENSG00000161958	chr17:7323421-7361026	12.1467	7.0209e-05	173010
RP11-77K12.1		ENSG00000261717	chr16:75327595-75499773	9.85925	6.93925e-05	142076
C20orf27	chromosome 20 open reading frame 27	ENSG00000101220	chr20:3734145-3749035	9.65549	6.8714e-05	140518
ACYP1	acylphosphatase 1, erythrocyte (common) type	ENSG00000119640	chr14:75519923-75545126	126.699	0.00115788	109426
GNL3L	guanine nucleotide binding protein-like 3 (nucleolar)-like	ENSG00000130119	chrX:54556643-54589229	5.71374	6.62478e-05	86247.8
PEA15	phosphoprotein enriched in astrocytes 15	ENSG00000162734	chr1:160171988-160185166	32.841	0.000431945	76031
RTN3	reticulon 3	ENSG00000133318	chr11:63448917-63527363	24.9918	0.000353955	70605.8
SLC35B3	solute carrier family 35 member B3	ENSG00000124786	chr6:8413299-8435800	4.65589	0.000159715	29151.9
MAPK11	mitogen-activated protein kinase 11	ENSG00000185386	chr22:50702141-50709196	3.00495	0.000104256	28822.3
CTD-2207O23.3		ENSG00000268861	chr19:7413847-7537364	2.09597	8.52876e-05	24574.9
NLRC5	NLR family, CARD domain containing 5	ENSG00000140853	chr16:57023396-57117443	5.58353	0.000300647	18571.5
MFSD3	major facilitator superfamily domain containing 3	ENSG00000167700	chr8:145734418-145736611	12.169	0.000704156	17282.2
GALNT4	polypeptide N-acetylgalactosaminyltransferase 4	ENSG00000257594	chr12:89813494-89934079	2.08461	0.000355533	5863.31
SPRYD7	SPRY domain containing 7	ENSG00000123178	chr13:50486837-50510637	5.20943	0.000927839	5614.73
ATP6V1G2-DDX39B	ATP6V1G2-DDX39B readthrough (NMD candidate)	ENSG00000254870	chr6:31496493-31527677	6.77929	0.00120788	5612.39
PTTG1IP	pituitary tumor-transforming 1 interacting protein	ENSG00000183255	chr21:46269499-46293818	20.7548	0.00687954	3016.79
RP11-51F16.8		ENSG00000125695	chr17:61780191-61896677	0.619188	0.000226976	2727.95
KLF6	Kruppel-like factor 6	ENSG00000067082	chr10:3818187-3827473	18.8893	0.0262243	720.298
GPR98		ENSG00000164199	chr5:89811427-90460038	7.00379	0.0125495	558.092
AK1	adenylate kinase 1	ENSG00000106992	chr9:130628758-130667687	94.8843	0.241007	393.699
DIABLO	diablo, IAP-binding mitochondrial protein	ENSG00000184047	chr12:122688089-122751068	79.7206	0.210845	378.102
ZBTB24	zinc finger and BTB domain containing 24	ENSG00000112365	chr6:109765264-109804440	2.10742	0.00590894	356.649
CAMK1D	calcium/calmodulin dependent protein kinase ID	ENSG00000183049	chr10:12391480-12877545	21.2319	0.0637609	332.991
SHPK	sedoheptulokinase	ENSG00000197417	chr17:3468737-3539616	12.8141	0.0433209	295.796
ZNF260	zinc finger protein 260	ENSG00000254004	chr19:37001596-37119499	74.0311	0.261802	282.775
PPP1R37	protein phosphatase 1 regulatory subunit 37	ENSG00000104866	chr19:45574757-45808541	24.6981	0.0880876	280.382
NDST1	N-deacetylase/N-sulfotransferase 1	ENSG00000070614	chr5:149855093-149937773	18.0633	0.064764	278.911
SCRIB	scribbled planar cell polarity protein	ENSG00000180900	chr8:144873089-144897549	1842.38	6.89526	267.195
INPP5K	inositol polyphosphate-5-phosphatase K	ENSG00000132376	chr17:1397864-1420182	36.3508	0.186802	194.596
RNASEK-C17orf49	RNASEK-C17orf49 readthrough	ENSG00000161939	chr17:6757179-6922978	50.6746	0.330577	153.291
LDOC1L	leucine zipper, down-regulated in cancer 1-like	ENSG00000188636	chr22:44888451-44894178	12.7325	0.0954679	133.37
RBM18	RNA binding motif protein 18	ENSG00000119446	chr9:124999902-125085743	2.11554	0.0159097	132.972
EXTL3	exostosin like glycosyltransferase 3	ENSG00000012232	chr8:28457985-28613116	45.515	0.359754	126.517
ZWILCH	zwilch kinetochore protein	ENSG00000174442	chr15:66790354-66858317	41.2079	0.328481	125.45
GRHL1	grainyhead like transcription factor 1	ENSG00000134317	chr2:10085340-10142411	11.8765	0.0971947	122.192
EGLN1	egl-9 family hypoxia-inducible factor 1	ENSG00000135766	chr1:231499496-231560790	50.1032	0.440756	113.676
CRAMP1L		ENSG00000007545	chr16:1662325-1752281	10.054	0.0903761	111.246
ZNF571	zinc finger protein 571	ENSG00000180479	chr19:37988062-38210691	134.859	1.24301	108.494
SIM1	single-minded family bHLH transcription factor 1	ENSG00000112246	chr6:100832890-100912805	36.3764	0.349378	104.118
PITPNM1	phosphatidylinositol transfer protein, membrane associated 1	ENSG00000110697	chr11:67259238-67273734	14.6801	0.143217	102.502
SPAG16	sperm associated antigen 16	ENSG00000144451	chr2:214149102-215548970	46.2539	0.463186	99.8603
SNX12	sorting nexin 12	ENSG00000147164	chrX:70279093-70288273	45.7536	0.458217	99.8513
KIAA1211	KIAA1211	ENSG00000109265	chr4:57036360-57194791	25.3141	0.257493	98.3096
MPDZ	multiple PDZ domain crumbs cell polarity complex component	ENSG00000107186	chr9:13105702-13279589	1010.25	10.3152	97.9375
PVRL1		ENSG00000110400	chr11:119479134-119599794	17.3139	0.179363	96.5296
GALNT6	polypeptide N-acetylgalactosaminyltransferase 6	ENSG00000139629	chr12:51745030-51902980	9.49647	0.100903	94.1155
NDUFS7	NADH:ubiquinone oxidoreductase core subunit S7	ENSG00000115286	chr19:1383525-1396466	99.4994	1.05767	94.0744
D2HGDH	D-2-hydroxyglutarate dehydrogenase	ENSG00000180902	chr2:242673993-242708231	48.8769	0.526191	92.888
NTN1	netrin 1	ENSG00000065320	chr17:8924858-9147317	7.86533	0.0881108	89.2661
EVI5L	ecotropic viral integration site 5 like	ENSG00000142459	chr19:7895118-7929862	61.3884	0.689273	89.0621
RASA2	RAS p21 protein activator 2	ENSG00000155903	chr3:141205888-141334184	24.5017	0.280169	87.4532
C14orf80	chromosome 14 open reading frame 80	ENSG00000185347	chr14:105952653-105965912	51.0207	0.595086	85.7366
ATP6AP1	ATPase H+ transporting accessory protein 1	ENSG00000071553	chrX:153656977-153664862	39.7038	0.467566	84.9157
ATP5E	ATP synthase, H+ transporting, mitochondrial F1 complex, epsilon subunit	ENSG00000124172	chr20:57594308-57617964	27.7331	0.32702	84.8052

## Sheet: Tab 2. Column Definition 
1	Gene symbol	Gene symbols and synonyms
	Description	Gene descriptions for the transcripts
	Gene ID	Gene IDs for the transcripts
	Locus	Chromosomal locus for the transcripts
	SYNJ2BP IP_FPKM	The FPKM valude of SYNJ2BP IP sample
	IgG_FPKM	The FPKM valude of IgG sample
	Fold change	The enrichment ratios of SYNJ2BP clients

## Sheet: Tab 3. Table legend
Supplementary Dataset 6. The list of SYNJ2BP mRNA clients. The mRNA clients of SYNJ2BP are listed in Tab 1. The relative enrichment of each mRNA was obtained from the fold change of gene-level FPKM (fragments per kilobase of transcript per million mapped reads) values.
