# Supplementary material for: Functional proximity mapping of RNA binding proteins uncovers a mitochondrial mRNA anchor that promotes stress recovery
Source: Research Square preprint supplement (doi:10.21203/rs.3.rs-103196/v1), 2020-11-12
Supplement: Supplementary file 4 [file b24621222571597342e6dd20.xlsx]

## Sheet: Tab 1. Unfiltered protein list
Uniprot accession	Gene symbol	Protein name	GO biological process	GO cellular component	Log2(127C/126C)	Log2(128N/126C)	Log2(127C/127N)	Log2(128N/127N)	Log2(129C/128C)	Log2(130N/128C)	Log2(131N/130C)	Log2(131C/130C)	Log2(129C/131C)	Log2(130N/131C)	Log2(127C/131N)	Log2(128N/131N)
Q14204	DYNC1H1	Cytoplasmic dynein 1 heavy chain 1	G2/M transition of mitotic cell cycle;mitotic cell cycle;transport;organelle organization;microtubule-based movement;mitotic spindle organization;metabolic process;antigen processing and presentation of exogenous peptide antigen via MHC class II;cytoplasmic mRNA processing body assembly;stress granule assembly;establishment of spindle localization;	centrosome;cytosol;cytoplasmic dynein complex;microtubule;membrane;filopodium;extracellular exosome;	3.364	3.559	2.801	2.987	2.606	2.689	3.44	3.341	-0.626	-0.57	-0.501	-0.257
P78527	PRKDC	DNA-dependent protein kinase catalytic subunit	telomere maintenance;double-strand break repair via homologous recombination;somitogenesis;negative regulation of protein phosphorylation;B cell lineage commitment;pro-B cell differentiation;T cell lineage commitment;negative regulation of immunoglobulin production;positive regulation of immune system process;DNA repair;double-strand break repair;double-strand break repair via nonhomologous end j…	nucleoplasm;transcription factor complex;nucleolus;cytosol;DNA-dependent protein kinase-DNA ligase 4 complex;membrane;nonhomologous end joining complex;	3.114	3.292	3.597	3.779	2.618	2.673	3.182	3.111	-0.283	-0.223	-0.273	-0.042
Q8WXH0	SYNE2	Nesprin-2	nuclear envelope organization;nuclear migration;establishment or maintenance of cell polarity;fibroblast migration;positive regulation of cell migration;nuclear migration along microfilament;protein localization to nucleus;centrosome localization;cytoskeletal anchoring at nuclear membrane;	nucleus;nuclear envelope;nuclear outer membrane;nucleoplasm;cytoplasm;mitochondrion;focal adhesion;integral component of membrane;aggresome;sarcoplasmic reticulum;Z disc;lamellipodium membrane;filopodium membrane;nuclear membrane;nuclear lumen;sarcoplasmic reticulum membrane;LINC complex;intermediate filament cytoskeleton;extracellular exosome;	3.389	3.571	3.318	3.503	2.835	2.895	3.479	3.371	-0.491	-0.455	-0.714	-0.478
P49792	RANBP2	E3 SUMO-protein ligase RanBP2	mitotic cell cycle;protein peptidyl-prolyl isomerization;response to amphetamine;carbohydrate metabolic process;protein folding;protein import into nucleus;mitotic nuclear envelope disassembly;small GTPase mediated signal transduction;hexose transport;gene expression;regulation of glucose transport;glucose transport;viral process;protein sumoylation;viral life cycle;viral transcription;cytokine-m…	nuclear pore;mitochondrion;cytosol;membrane;nuclear membrane;nuclear inclusion body;nuclear pore cytoplasmic filaments;nuclear pore nuclear basket;	4.26	4.393	3.63	3.813	3.061	3.16	3.671	3.578	-0.658	-0.612	-0.597	-0.427
P21333	FLNA	Filamin-A	epithelial to mesenchymal transition;platelet degranulation;adenylate cyclase-inhibiting dopamine receptor signaling pathway;small GTPase mediated signal transduction;blood coagulation;negative regulation of transcription from RNA polymerase I promoter;platelet activation;actin cytoskeleton reorganization;cell junction assembly;protein localization to cell surface;negative regulation of protein c…	extracellular region;nucleus;nucleolus;cytoplasm;trans-Golgi network;cytosol;actin filament;plasma membrane;focal adhesion;actin cytoskeleton;membrane;cortical cytoskeleton;Myb complex;actin filament bundle;neuronal cell body;dendritic shaft;perinuclear region of cytoplasm;extracellular exosome;apical dendrite;	3.513	3.655	3.182	3.336	2.8	2.922	3.839	3.778	-1.421	-1.319	-1.65	-1.524
P46013	MKI67	Proliferation marker protein Ki-67	DNA metabolic process;meiotic nuclear division;cell proliferation;response to organic cyclic compound;hyaluronan metabolic process;organ regeneration;cellular response to heat;	chromosome, centromeric region;condensed chromosome;nucleus;nucleolus;cytoplasm;membrane;	3.177	3.322	4.076	4.213	2.977	2.982	3.162	3.049	-0.241	-0.24	-0.777	-0.594
Q99996	AKAP9	A-kinase anchor protein 9	G2/M transition of mitotic cell cycle;mitotic cell cycle;transport;organelle organization;signal transduction;synaptic transmission;spermatogenesis;positive regulation of peptidyl-serine phosphorylation;Sertoli cell development;regulation of membrane repolarization;regulation of ventricular cardiac muscle cell membrane repolarization;cellular response to cAMP;regulation of heart rate by cardiac c…	pericentriolar material;Golgi apparatus;cis-Golgi network;centrosome;cytosol;cytoskeleton;voltage-gated potassium channel complex;ciliary basal body;intracellular membrane-bounded organelle;	4.003	4.156	3.648	3.832	3.078	3.156	3.578	3.444	-0.386	-0.339	-0.569	-0.339
P15924	DSP	Desmoplakin	desmosome organization;ventricular compact myocardium morphogenesis;apoptotic process;cellular component disassembly involved in execution phase of apoptosis;epidermis development;programmed cell death;peptide cross-linking;keratinocyte differentiation;adherens junction organization;wound healing;intermediate filament organization;protein localization to adherens junction;bundle of His cell-Purki…	cornified envelope;nucleus;cytoplasm;plasma membrane;fascia adherens;intercalated disc;basolateral plasma membrane;desmosome;extracellular exosome;intermediate filament;	3.507	3.614	3.195	3.346	2.652	2.741	3.4	3.261	-0.635	-0.589	-0.63	-0.48
O95613	PCNT	Pericentrin	G2/M transition of mitotic cell cycle;microtubule cytoskeleton organization;mitotic cell cycle;organelle organization;cilium assembly;positive regulation of intracellular protein transport;	cytoplasm;centrosome;centriole;cytosol;microtubule;membrane;centriolar satellite;	3.637	3.781	2.945	3.083	2.793	2.845	3.135	3.032	-0.086	-0.06	-0.151	0.03
P35579	MYH9	Myosin-9	meiotic spindle organization;cytokinesis;angiogenesis;in utero embryonic development;establishment of T cell polarity;membrane protein ectodomain proteolysis;phagocytosis, engulfment;integrin-mediated signaling pathway;small GTPase mediated signal transduction;axon guidance;myoblast fusion;regulation of cell shape;protein transport;actin filament-based movement;platelet formation;monocyte differe…	stress fiber;ruffle;uropod;nucleus;cytoplasm;spindle;actomyosin contractile ring;cytosol;plasma membrane;brush border;cell-cell adherens junction;actin cytoskeleton;membrane;myosin II complex;cell leading edge;neuromuscular junction;cleavage furrow;actomyosin;protein complex;extracellular exosome;myosin II filament;immunological synapse;plasma membrane;focal adhesion;COP9 signalosome;integrin com…	3.037	3.228	3.095	3.248	2.764	2.879	3.686	3.606	-1.179	-1.099	-1.512	-1.346
Q9Y490	TLN1	Talin-1	platelet degranulation;movement of cell or subcellular component;muscle contraction;cytoskeletal anchoring at plasma membrane;cell-cell junction assembly;cell-substrate junction assembly;axon guidance;blood coagulation;viral process;platelet activation;cortical actin cytoskeleton organization;endoplasmic reticulum unfolded protein response;IRE1-mediated unfolded protein response;cellular protein …	ruffle;extracellular region;cytoplasm;microtubule organizing center;cytosol;plasma membrane;cell-cell junction;focal adhesion;cell surface;ruffle membrane;extracellular exosome;	3.166	3.332	3.265	3.453	2.725	2.805	3.451	3.388	-0.873	-0.818	-1.156	-0.925
Q92616	GCN1	eIF-2-alpha kinase activator GCN1	translation;regulation of translation;	cytoplasm;ribosome;membrane;	3.293	3.508	3.385	3.649	2.731	2.791	3.32	3.271	-0.648	-0.573	-0.714	-0.417
Q6P2Q9	PRPF8	Pre-mRNA-processing-splicing factor 8	spliceosomal tri-snRNP complex assembly;RNA splicing, via transesterification reactions;mRNA splicing, via spliceosome;mRNA processing;RNA splicing;gene expression;	nucleus;nucleoplasm;U5 snRNP;membrane;nuclear speck;catalytic step 2 spliceosome;	3.001	3.209	3.218	3.44	2.503	2.582	3.063	2.952	-0.137	-0.077	-0.214	0.038
A0A087WVQ6	CLTC	Clathrin heavy chain	intracellular protein transport;vesicle-mediated transport;	mitochondrion;clathrin coat of trans-Golgi network vesicle;clathrin coat of coated pit;myelin sheath;	3.635	3.833	2.681	2.882	2.752	2.867	3.74	3.682	-1.058	-0.99	-1.057	-0.807
Q9Y520-4	PRRC2C	Isoform 4 of Protein PRRC2C	hematopoietic progenitor cell differentiation;	membrane;	4.091	4.092	3.804	3.813	3.029	3.152	3.587	3.458	-0.652	-0.56	-0.705	-0.66
P42704	LRPPRC	Leucine-rich PPR motif-containing protein, mitochondrial	negative regulation of mitochondrial RNA catabolic process;transcription, DNA-templated;regulation of transcription, DNA-templated;mitochondrion transport along microtubule;mRNA transport;regulation of mitochondrial translation;	condensed nuclear chromosome;nucleus;nuclear inner membrane;nuclear outer membrane;nucleoplasm;mitochondrion;cytoskeleton;microtubule;membrane;ribonucleoprotein complex;mitochondrial nucleoid;perinuclear region of cytoplasm;mitochondrion;	2.784	3.007	4.048	4.279	2.674	2.721	2.93	2.852	-0.049	-0.01	-0.714	-0.442
P48634	PRRC2A	Protein PRRC2A		nucleus;cytoplasm;membrane;intracellular membrane-bounded organelle;extracellular exosome;	3.764	3.798	3.25	3.253	2.762	2.927	3.428	3.249	-0.532	-0.42	-0.611	-0.63
P49327	FASN	Fatty acid synthase	osteoblast differentiation;acetyl-CoA metabolic process;energy reserve metabolic process;fatty acid metabolic process;fatty acid biosynthetic process;vitamin metabolic process;water-soluble vitamin metabolic process;pantothenate metabolic process;triglyceride biosynthetic process;mammary gland development;positive regulation of cellular metabolic process;long-chain fatty-acyl-CoA biosynthetic pro…	cytoplasm;mitochondrion;Golgi apparatus;cytosol;plasma membrane;membrane;melanosome;glycogen granule;extracellular exosome;	3.546	3.72	2.758	2.978	2.688	2.788	3.393	3.294	-0.467	-0.382	-0.341	-0.091
Q86UP2	KTN1	Kinectin	microtubule-based movement;small GTPase mediated signal transduction;	endoplasmic reticulum;endoplasmic reticulum membrane;integral component of plasma membrane;membrane;integral component of membrane;	3.963	4.12	4.254	4.347	3.353	3.409	3.698	3.528	-0.439	-0.394	-0.888	-0.691
Q9NU22	MDN1	Midasin	protein complex assembly;metabolic process;	nucleus;nucleolus;cytoplasm;membrane;intermediate filament cytoskeleton;	3.063	3.29	3.069	3.324	2.523	2.571	3.115	3.035	-0.338	-0.281	-0.368	-0.111
Q14152	EIF3A	Eukaryotic translation initiation factor 3 subunit A	formation of translation preinitiation complex;formation of cytoplasmic translation initiation complex;translation;translational initiation;regulation of translational initiation;gene expression;cellular protein metabolic process;	nucleus;nucleolus;cytoplasm;cytosol;eukaryotic translation initiation factor 3 complex;membrane;eukaryotic 43S preinitiation complex;eukaryotic 48S preinitiation complex;eukaryotic translation initiation factor 3 complex, eIF3m;	2.677	2.778	3.634	3.813	2.465	2.559	2.944	2.751	-0.345	-0.248	-0.72	-0.651
Q09666	AHNAK	Neuroblast differentiation-associated protein AHNAK	regulation of RNA splicing;protein oligomerization;regulation of voltage-gated calcium channel activity;	nucleus;cytoplasm;lysosomal membrane;cytosol;plasma membrane;focal adhesion;actin cytoskeleton;membrane;T-tubule;vesicle;sarcolemma;costamere;cell-cell contact zone;extracellular exosome;membrane raft;	3.362	3.573	3.404	3.695	2.845	2.95	3.772	3.678	-1.387	-1.297	-1.707	-1.435
Q15149	PLEC	Plectin	apoptotic process;cellular component disassembly involved in execution phase of apoptosis;programmed cell death;extracellular matrix organization;hemidesmosome assembly;cell junction assembly;	cytoplasm;cytosol;plasma membrane;brush border;focal adhesion;sarcoplasm;hemidesmosome;sarcolemma;costamere;intermediate filament cytoskeleton;extracellular exosome;	3.005	3.196	2.712	2.867	2.388	2.487	3.414	3.249	-0.939	-0.838	-1.126	-0.994
P20700	LMNB1	Lamin-B1	apoptotic process;cellular component disassembly involved in execution phase of apoptosis;programmed cell death;	nuclear envelope;nuclear inner membrane;lamin filament;nucleoplasm;membrane;nuclear matrix;nuclear membrane;	2.439	2.504	3.556	3.663	2.287	2.325	2.715	2.573	0.035	0.063	-0.343	-0.241
O75592	MYCBP2	E3 ubiquitin-protein ligase MYCBP2	transcription, DNA-templated;regulation of transcription, DNA-templated;protein ubiquitination;branchiomotor neuron axon guidance;central nervous system projection neuron axonogenesis;regulation of protein localization;negative regulation of protein catabolic process;regulation of cytoskeleton organization;	nucleus;microtubule cytoskeleton;membrane;axon;	3.567	3.767	3.743	3.854	2.712	2.754	3.329	3.233	-0.361	-0.302	-0.256	-0.111
Q14980-2	NUMA1	Isoform 2 of Nuclear mitotic apparatus protein 1	G2/M transition of mitotic cell cycle;establishment of mitotic spindle orientation;mitotic cell cycle;nucleus organization;mitotic nuclear division;cell division;meiotic cell cycle;lung epithelial cell differentiation;	Golgi membrane;spindle pole;nucleus;nucleoplasm;chromosome;cytoplasm;spindle;cytosol;spindle microtubule;nuclear matrix;dendrite;neuronal cell body;apical part of cell;extracellular exosome;	2.71	2.851	3.412	3.517	2.576	2.678	3.125	2.918	-0.3	-0.275	-0.772	-0.696
P09874	PARP1	Poly [ADP-ribose] polymerase 1	negative regulation of transcription from RNA polymerase II promoter;telomere maintenance;DNA repair;base-excision repair;double-strand break repair;transcription, DNA-templated;transcription from RNA polymerase II promoter;transcription initiation from RNA polymerase II promoter;protein ADP-ribosylation;mitochondrion organization;transforming growth factor beta receptor signaling pathway;gene ex…	nucleus;nuclear envelope;nucleoplasm;transcription factor complex;nucleolus;mitochondrion;membrane;protein complex;	3.208	3.372	4.322	4.515	3.103	3.151	3.169	3.104	-0.153	-0.124	-0.82	-0.64
Q00341	HDLBP	Vigilin	lipid transport;cholesterol metabolic process;	nucleus;cytoplasm;plasma membrane;high-density lipoprotein particle;	3.002	3.186	4.248	4.341	2.68	2.784	3.041	2.943	-0.568	-0.526	-0.574	-0.38
F1T0I1	SEC16A	Protein transport protein sec16	COPII vesicle coating;	Golgi membrane;	4.484	4.548	3.19	3.292	2.865	2.917	3.411	3.298	-0.27	-0.192	0.087	0.226
H3BPE1	MACF1	Microtubule-actin cross-linking factor 1, isoforms 1/2/3/5	cell cycle arrest;metabolic process;Wnt signaling pathway;	cytoskeleton;	3.2	3.368	3.08	3.327	2.658	2.726	3.458	3.34	-0.795	-0.751	-1.102	-0.857
Q14008	CKAP5	Cytoskeleton-associated protein 5	G2/M transition of mitotic cell cycle;mitotic cell cycle;organelle organization;spindle organization;mitotic nuclear division;small GTPase mediated signal transduction;establishment or maintenance of microtubule cytoskeleton polarity;RNA transport;centrosome organization;cell division;	spindle pole;centrosome;cytosol;membrane;protein complex;gamma-tubulin complex;microtubule cytoskeleton;microtubule plus-end;	3.316	3.519	3.721	3.97	2.912	2.992	3.465	3.325	-0.723	-0.651	-1.102	-0.843
P49454	CENPF	Centromere protein F	G2/M transition of mitotic cell cycle;mitotic cell cycle;chromosome segregation;mitotic nuclear division;mitotic spindle assembly checkpoint;small GTPase mediated signal transduction;muscle organ development;cell proliferation;regulation of G2/M transition of mitotic cell cycle;protein transport;regulation of striated muscle tissue development;cell differentiation;response to drug;negative regula…	chromosome, centromeric region;kinetochore;spindle pole;condensed chromosome outer kinetochore;nucleus;nuclear envelope;nucleoplasm;cytoplasm;spindle;cytosol;nuclear matrix;midbody;pronucleus;perinuclear region of cytoplasm;chromatin;	3.577	3.823	3.511	3.72	2.768	2.792	3.549	3.437	-0.701	-0.639	-0.625	-0.366
A5YKK6	CNOT1	CCR4-NOT transcription complex subunit 1	negative regulation of transcription from RNA polymerase II promoter;nuclear-transcribed mRNA catabolic process, deadenylation-dependent decay;nuclear-transcribed mRNA poly(A) tail shortening;transcription, DNA-templated;multicellular organismal development;gene expression;positive regulation of cytoplasmic mRNA processing body assembly;negative regulation of translation;negative regulation of in…	cytoplasmic mRNA processing body;extracellular space;nucleoplasm;peroxisomal membrane;cytosol;membrane;CCR4-NOT complex;	3.697	3.83	3.46	3.7	2.874	2.945	3.65	3.581	-0.944	-0.889	-0.988	-0.77
Q14690	PDCD11	Protein RRP5 homolog	rRNA processing;mRNA processing;	nucleus;nucleolus;cytosol;small-subunit processome;	2.848	3.103	4.14	4.286	2.615	2.714	2.987	2.919	-0.245	-0.165	-0.716	-0.419
Q4VCS5	AMOT	Angiomotin	vasculogenesis;in utero embryonic development;gastrulation with mouth forming second;establishment of cell polarity involved in ameboidal cell migration;chemotaxis;cell-cell junction assembly;negative regulation of angiogenesis;actin cytoskeleton organization;regulation of cell migration;negative regulation of GTPase activity;cellular protein localization;hippo signaling;positive regulation of em…	stress fiber;ruffle;cytoplasm;cytosol;actin filament;bicellular tight junction;external side of plasma membrane;cell surface;integral component of membrane;lamellipodium;endocytic vesicle;COP9 signalosome;	4.399	4.467	3.468	3.52	3.107	3.222	3.851	3.676	-0.803	-0.686	-0.808	-0.707
E7EUU4	EIF4G1	Eukaryotic translation initiation factor 4 gamma 1		cytoplasm;	3.951	4.107	3.668	3.728	3.097	3.198	3.767	3.667	-0.965	-0.883	-1.141	-1.041
P46821	MAP1B	Microtubule-associated protein 1B	microtubule bundle formation;cellular process;dendrite development;negative regulation of intracellular transport;positive regulation of axon extension;mitochondrion transport along microtubule;axon extension;establishment of monopolar cell polarity;	photoreceptor outer segment;cytoplasm;cytosol;microtubule;microtubule associated complex;plasma membrane;cell junction;dendritic spine;neuronal postsynaptic density;	4.033	4.275	4.062	4.286	3.161	3.223	3.79	3.657	-0.769	-0.723	-1.07	-0.881
Q92900	UPF1	Regulator of nonsense transcripts 1	nuclear-transcribed mRNA catabolic process, nonsense-mediated decay;nuclear-transcribed mRNA catabolic process;DNA replication;DNA repair;mRNA export from nucleus;regulation of translational termination;dosage compensation by inactivation of X chromosome;gene expression;histone mRNA catabolic process;	chromatin;cytoplasmic mRNA processing body;nucleus;nucleoplasm;cytoplasm;cytosol;exon-exon junction complex;supraspliceosomal complex;	3.664	3.857	3.749	3.908	2.94	3.025	3.558	3.446	-0.75	-0.678	-0.943	-0.774
O75643	SNRNP200	U5 small nuclear ribonucleoprotein 200 kDa helicase	cis assembly of pre-catalytic spliceosome;mRNA splicing, via spliceosome;osteoblast differentiation;RNA splicing;gene expression;	nucleus;nucleoplasm;spliceosomal complex;U5 snRNP;membrane;catalytic step 2 spliceosome;	3.088	3.285	3.319	3.533	2.581	2.668	3.177	3.128	-0.277	-0.223	-0.229	0.016
Q08211	DHX9	ATP-dependent RNA helicase A	mRNA splicing, via spliceosome;osteoblast differentiation;RNA processing;circadian rhythm;RNA splicing;gene expression;positive regulation of type I interferon production;DNA duplex unwinding;cellular response to heat;innate immune response;CRD-mediated mRNA stabilization;	nucleus;nucleoplasm;nucleolus;cytoplasm;centrosome;cytosol;membrane;ribonucleoprotein complex;cytoplasmic ribonucleoprotein granule;CRD-mediated mRNA stability complex;	2.882	3.035	3.675	3.867	2.469	2.559	2.996	2.833	-0.219	-0.192	-0.601	-0.362
Q9H583	HEATR1	HEAT repeat-containing protein 1	maturation of SSU-rRNA from tricistronic rRNA transcript (SSU-rRNA, 5.8S rRNA, LSU-rRNA);positive regulation of transcription from RNA polymerase I promoter;	nucleus;nucleolus;mitochondrion;membrane;90S preribosome;small-subunit processome;t-UTP complex;	3.071	3.315	3.965	4.199	2.577	2.665	3.11	3.061	-0.343	-0.232	-0.529	-0.229
A8MQ02	AFDN	Afadin	signal transduction;	nucleoplasm;cytoplasm;plasma membrane;cell junction;	3.27	3.447	2.96	3.13	2.813	2.896	3.817	3.729	-1.541	-1.45	-1.964	-1.822
P04264	KRT1	Keratin, type II cytoskeletal 1	complement activation, lectin pathway;retina homeostasis;response to oxidative stress;fibrinolysis;regulation of angiogenesis;negative regulation of inflammatory response;establishment of skin barrier;	extracellular space;nucleus;cytoskeleton;plasma membrane;membrane;extracellular matrix;keratin filament;extracellular exosome;blood microparticle;	0.017	0.217	-0.202	0.032	0.079	-0.149	1.447	1.287	0.231	-0.096	0.078	0.254
P08670	VIM	Vimentin	apoptotic process;cellular component disassembly involved in execution phase of apoptosis;movement of cell or subcellular component;positive regulation of gene expression;negative regulation of neuron projection development;programmed cell death;astrocyte development;viral process;muscle filament sliding;intermediate filament organization;Bergmann glial cell differentiation;SMAD protein signal tr…	cytoplasm;peroxisome;cytosol;cytoskeleton;intermediate filament;focal adhesion;cell leading edge;neuron projection;intermediate filament cytoskeleton;extracellular exosome;plasma membrane;	3.62	3.679	2.077	2.286	3.404	3.546	2.952	2.743	1.059	1.102	-0.092	0.13
O75691	UTP20	Small subunit processome component 20 homolog	endonucleolytic cleavage in ITS1 to separate SSU-rRNA from 5.8S rRNA and LSU-rRNA from tricistronic rRNA transcript (SSU-rRNA, 5.8S rRNA, LSU-rRNA);endonucleolytic cleavage to generate mature 5'-end of SSU-rRNA from (SSU-rRNA, 5.8S rRNA, LSU-rRNA);endonucleolytic cleavage in 5'-ETS of tricistronic rRNA transcript (SSU-rRNA, 5.8S rRNA, LSU-rRNA);rRNA processing;negative regulation of cell prolifer…	nucleoplasm;nucleolus;cytoplasm;90S preribosome;preribosome, small subunit precursor;small-subunit processome;	2.92	3.085	3.983	4.213	2.59	2.626	3.025	2.899	-0.187	-0.16	-0.446	-0.179
Q9BQG0	MYBBP1A	Myb-binding protein 1A	osteoblast differentiation;transcription, DNA-templated;regulation of transcription, DNA-templated;nucleocytoplasmic transport;respiratory electron transport chain;circadian regulation of gene expression;cellular response to glucose starvation;negative regulation of transcription, DNA-templated;positive regulation of cell cycle arrest;DNA biosynthetic process;intrinsic apoptotic signaling pathway…	nucleus;nucleolus;cytoplasm;membrane;NLS-dependent protein nuclear import complex;intracellular membrane-bounded organelle;	2.508	2.712	3.836	3.909	2.371	2.431	2.611	2.395	-0.011	0.062	-0.625	-0.42
O00571	DDX3X	ATP-dependent RNA helicase DDX3X	transcription, DNA-templated;translational initiation;chromosome segregation;extrinsic apoptotic signaling pathway via death domain receptors;response to virus;RNA secondary structure unwinding;positive regulation of gene expression;viral process;negative regulation of translation;positive regulation of cell growth;negative regulation of cell growth;negative regulation of protein complex assembly…	nucleus;cytoplasm;mitochondrial outer membrane;cytoplasmic stress granule;nuclear speck;extracellular exosome;eukaryotic translation initiation factor 3 complex;cytosolic small ribosomal subunit;	3.019	3.218	3.263	3.443	2.7	2.802	3.181	3.067	-0.443	-0.377	-0.984	-0.807
Q7L2E3	DHX30	Putative ATP-dependent RNA helicase DHX30	RNA processing;	cytoplasm;mitochondrion;mitochondrial nucleoid;	2.926	3.123	3.739	4.012	2.61	2.693	3.027	2.922	-0.218	-0.172	-0.719	-0.392
Q96SN8	CDK5RAP2	CDK5 regulatory subunit-associated protein 2	G2/M transition of mitotic cell cycle;establishment of mitotic spindle orientation;microtubule cytoskeleton organization;mitotic cell cycle;microtubule bundle formation;organelle organization;chromosome segregation;brain development;neurogenesis;regulation of neuron differentiation;negative regulation of neuron differentiation;positive regulation of transcription, DNA-templated;negative regulatio…	pericentriolar material;spindle pole;cytoplasm;Golgi apparatus;centrosome;cytosol;cytoskeleton;microtubule;cell junction;perinuclear region of cytoplasm;extracellular exosome;	4.191	4.38	3.41	3.633	3.097	3.168	3.536	3.354	-0.271	-0.207	-0.395	-0.185
Q02880	TOP2B	DNA topoisomerase 2-beta	resolution of meiotic recombination intermediates;sister chromatid segregation;neuron migration;DNA topological change;DNA unwinding involved in DNA replication;axonogenesis;forebrain development;mitotic DNA integrity checkpoint;	nucleus;nucleoplasm;cytoplasm;cytosol;DNA topoisomerase complex (ATP-hydrolyzing);nucleolus;nucleoid;heterochromatin;	2.828	3.08	3.963	4.1	2.735	2.781	3.004	2.887	-0.244	-0.189	-0.79	-0.578
A0A0C4DG89	DDX46	Probable ATP-dependent RNA helicase DDX46	mRNA splicing, via spliceosome;regulation of gene expression;RNA secondary structure unwinding;		2.428	2.577	2.193	2.359	2.528	2.607	2.817	2.651	-0.059	0.001	-0.362	-0.248
O14646	CHD1	Chromodomain-helicase-DNA-binding protein 1	chromatin remodeling;transcription, DNA-templated;regulation of transcription from RNA polymerase II promoter;DNA duplex unwinding;positive regulation by host of viral transcription;	nucleus;cytoplasm;	2.731	2.849	2.614	2.723	2.482	2.516	2.857	2.64	-0.004	0.022	-0.347	-0.177
P07814	EPRS	Bifunctional glutamate/proline--tRNA ligase	tRNA aminoacylation for protein translation;glutamyl-tRNA aminoacylation;prolyl-tRNA aminoacylation;protein complex assembly;gene expression;negative regulation of translation;cellular response to interferon-gamma;	cytoplasm;cytosol;membrane;aminoacyl-tRNA synthetase multienzyme complex;ribonucleoprotein complex;GAIT complex;	3.141	3.242	3.753	3.856	2.85	2.925	3.373	3.24	-0.572	-0.511	-0.847	-0.683
Q13813	SPTAN1	Spectrin alpha chain, non-erythrocytic 1	apoptotic process;cellular component disassembly involved in execution phase of apoptosis;axon guidance;programmed cell death;actin filament capping;	cytosol;fascia adherens;spectrin;microtubule cytoskeleton;membrane;lateral plasma membrane;Z disc;cuticular plate;intracellular membrane-bounded organelle;extracellular exosome;extracellular vesicle;	3.103	3.296	3.059	3.333	2.736	2.841	3.771	3.643	-1.382	-1.348	-1.78	-1.549
Q7KZF4	SND1	Staphylococcal nuclease domain-containing protein 1	osteoblast differentiation;transcription, DNA-templated;regulation of transcription, DNA-templated;viral process;posttranscriptional gene silencing by RNA;nucleic acid phosphodiester bond hydrolysis;	nucleus;cytoplasm;mitochondrion;membrane;RISC complex;melanosome;extracellular exosome;dense body;	3.064	3.195	4.249	4.359	2.423	2.523	2.924	2.799	-0.674	-0.608	-0.323	-0.167
P27816	MAP4	Microtubule-associated protein 4	mitotic spindle organization;microtubule sliding;establishment of spindle orientation;cell division;	cytoplasm;microtubule;microtubule associated complex;plasma membrane;microtubule cytoskeleton;extracellular exosome;mitotic spindle;	3.785	3.951	4.228	4.359	3.209	3.302	3.532	3.398	-0.208	-0.218	-0.712	-0.539
Q5VT06	CEP350	Centrosome-associated protein 350	microtubule anchoring;	nucleoplasm;cytoplasm;centrosome;spindle;membrane;	3.845	3.933	3.236	3.391	2.74	2.779	3.196	3.1	-0.323	-0.271	-0.415	-0.199
Q01082	SPTBN1	Spectrin beta chain, non-erythrocytic 1	mitotic cytokinesis;plasma membrane organization;common-partner SMAD protein phosphorylation;SMAD protein import into nucleus;axon guidance;Golgi to plasma membrane protein transport;actin filament capping;membrane assembly;protein targeting to plasma membrane;positive regulation of interleukin-2 secretion;regulation of protein localization to plasma membrane;positive regulation of protein locali…	nucleolus;cytoplasm;cytosol;spectrin;spectrin-associated cytoskeleton;axolemma;M band;cuticular plate;extracellular exosome;neuronal postsynaptic density;	3.017	3.238	2.99	3.203	2.704	2.766	3.681	3.441	-1.181	-1.037	-1.558	-1.504
O60841	EIF5B	Eukaryotic translation initiation factor 5B	translation;translational initiation;regulation of translational initiation;gene expression;cellular protein metabolic process;	cytoplasm;cytosol;nucleus;	3.158	3.354	1.473	1.65	2.534	2.644	2.997	2.937	-0.431	-0.344	-0.388	-0.177
Q9UQ35	SRRM2	Serine/arginine repetitive matrix protein 2	mRNA splicing, via spliceosome;	nucleoplasm;Cajal body;nuclear speck;catalytic step 2 spliceosome;	2.614	2.672	2.538	2.666	2.285	2.429	2.794	2.719	-0.314	-0.266	-0.561	-0.459
P52272	HNRNPM	Heterogeneous nuclear ribonucleoprotein M	alternative mRNA splicing, via spliceosome;mRNA splicing, via spliceosome;RNA splicing;gene expression;	nucleoplasm;spliceosomal complex;nucleolus;integral component of plasma membrane;membrane;nuclear matrix;extracellular matrix;paraspeckles;extracellular exosome;catalytic step 2 spliceosome;	2.599	2.719	3.812	3.849	2.478	2.56	2.813	2.656	-0.066	-0.032	-0.835	-0.684
Q9P2E9	RRBP1	Ribosome-binding protein 1	osteoblast differentiation;translation;protein transport;	endoplasmic reticulum;ribosome;membrane;integral component of endoplasmic reticulum membrane;	3.662	3.795	2.421	2.629	2.952	3.039	3.265	3.13	-0.307	-0.268	-0.548	-0.363
Q15154	PCM1	Pericentriolar material 1 protein	G2/M transition of mitotic cell cycle;mitotic cell cycle;organelle organization;interkinetic nuclear migration;cytoplasmic microtubule organization;microtubule anchoring;microtubule anchoring at centrosome;nonmotile primary cilium assembly;intraciliary transport involved in cilium morphogenesis;cilium assembly;negative regulation of neurogenesis;centrosome organization;protein localization to cen…	pericentriolar material;cytoplasm;centrosome;cytosol;membrane;nuclear membrane;centriolar satellite;ciliary basal body;protein complex;nonmotile primary cilium;centrosome;	4.467	4.468	3.271	3.299	3.186	3.267	3.392	3.282	-0.006	0.064	-0.005	0.126
Q14789	GOLGB1	Golgin subfamily B member 1	Golgi organization;	Golgi membrane;endoplasmic reticulum-Golgi intermediate compartment;Golgi apparatus;Golgi stack;cis-Golgi network;membrane;integral component of membrane;	3.318	3.494	3.089	3.245	2.836	2.909	3.514	3.409	-0.653	-0.59	-1.125	-0.915
Q9HCE1	MOV10	Putative helicase MOV-10	transcription, DNA-templated;regulation of transcription, DNA-templated;epidermal growth factor receptor signaling pathway;Notch signaling pathway;fibroblast growth factor receptor signaling pathway;mRNA cleavage involved in gene silencing by miRNA;Fc-epsilon receptor signaling pathway;innate immune response;neurotrophin TRK receptor signaling pathway;phosphatidylinositol-mediated signaling;	cytoplasmic mRNA processing body;extracellular space;cytosol;	3.266	3.394	4.067	4.268	2.661	2.806	3.29	3.126	-0.567	-0.454	-0.733	-0.584
P43243	MATR3	Matrin-3	posttranscriptional regulation of gene expression;	nuclear inner membrane;nucleoplasm;membrane;nuclear matrix;	2.844	2.911	3.545	3.599	2.584	2.605	2.986	2.824	-0.26	-0.192	-0.818	-0.737
Q7Z6Z7	HUWE1	E3 ubiquitin-protein ligase HUWE1	protein polyubiquitination;base-excision repair;protein monoubiquitination;histone ubiquitination;cell differentiation;protein ubiquitination involved in ubiquitin-dependent protein catabolic process;positive regulation of protein targeting to mitochondrion;	nucleus;nucleoplasm;cytoplasm;membrane;extracellular exosome;	3.045	3.147	2.692	2.814	2.308	2.424	3.23	3.032	-0.595	-0.544	-0.435	-0.25
F8VPD4	CAD	CAD protein	urea cycle;'de novo' pyrimidine nucleobase biosynthetic process;arginine biosynthetic process;glutamine metabolic process;	nucleus;nucleoplasm;cytoplasm;plasma membrane;	3.353	3.544	2.566	2.864	2.492	2.596	3.32	3.239	-0.565	-0.491	-0.418	-0.163
Q12906-7	ILF3	Isoform 7 of Interleukin enhancer-binding factor 3	transcription, DNA-templated;protein phosphorylation;negative regulation of translation;negative regulation of viral genome replication;negative regulation of transcription, DNA-templated;positive regulation of transcription, DNA-templated;defense response to virus;	nucleus;nucleoplasm;nucleolus;cytoplasm;mitochondrion;membrane;ribonucleoprotein complex;	2.721	2.826	3.865	3.98	2.491	2.551	2.867	2.787	-0.286	-0.216	-0.813	-0.73
O43707	ACTN4	Alpha-actinin-4	response to hypoxia;platelet degranulation;blood coagulation;protein transport;vesicle transport along actin filament;platelet activation;positive regulation of cell migration;positive regulation of sodium:proton antiporter activity;peroxisome proliferator activated receptor signaling pathway;regulation of apoptotic process;retinoic acid receptor signaling pathway;positive regulation of pinocytos…	stress fiber;extracellular region;extracellular space;intracellular;nucleus;cytoplasm;cell-cell junction;focal adhesion;Z disc;ribonucleoprotein complex;cortical cytoskeleton;platelet alpha granule lumen;pseudopodium;neuron projection;protein complex;perinuclear region of cytoplasm;extracellular exosome;actin cytoskeleton;	3.43	3.569	2.997	3.193	3.066	3.198	4.024	3.897	-1.654	-1.514	-2.239	-2.099
P18583-5	SON	Isoform D of Protein SON	microtubule cytoskeleton organization;cytokinesis;mRNA processing;RNA splicing;negative regulation of apoptotic process;regulation of RNA splicing;regulation of cell cycle;	nucleoplasm;nuclear speck;	2.424	2.527	2.236	2.265	2.026	2.09	2.608	2.381	-0.144	-0.061	-0.091	0.02
Q6PKG0	LARP1	La-related protein 1	translational initiation;cell proliferation;positive regulation of macroautophagy;TOR signaling;positive regulation of translation;	nucleoplasm;cytoplasm;membrane;TORC1 complex;	3.755	3.888	3.987	4.12	3.023	3.1	3.577	3.442	-0.53	-0.486	-0.902	-0.722
Q9NR30	DDX21	Nucleolar RNA helicase 2	osteoblast differentiation;rRNA processing;transcription from RNA polymerase II promoter;response to virus;RNA secondary structure unwinding;response to exogenous dsRNA;	nucleus;nucleoplasm;nucleolus;membrane;	2.718	2.809	3.723	3.922	2.5	2.521	2.769	2.672	-0.242	-0.199	-0.797	-0.597
Q8IY81	FTSJ3	pre-rRNA processing protein FTSJ3	enzyme-directed rRNA 2'-O-methylation;	nucleus;nucleolus;preribosome, small subunit precursor;	0.602	0.734	3.892	3.916	0.572	0.55	1.067	0.911	0.024	-0.017	-0.198	-0.132
P46940	IQGAP1	Ras GTPase-activating-like protein IQGAP1	regulation of cytokine production;energy reserve metabolic process;signal transduction;epidermal growth factor receptor signaling pathway;small GTPase mediated signal transduction;fibroblast growth factor receptor signaling pathway;negative regulation of GTPase activity;negative regulation of dephosphorylation;cellular response to platelet-derived growth factor stimulus;positive regulation of GTP…	ruffle;nucleoplasm;cytoplasm;cytosol;microtubule;actin filament;plasma membrane;focal adhesion;lateral plasma membrane;cell junction;axon;growth cone;midbody;extrinsic component of cytoplasmic side of plasma membrane;slit diaphragm;cytoplasmic ribonucleoprotein granule;neuron projection;extracellular exosome;actin cytoskeleton;microtubule cytoskeleton;	2.945	3.234	3.163	3.469	2.784	2.897	3.361	3.336	-0.824	-0.705	-1.39	-1.11
Q9Y4L1	HYOU1	Hypoxia up-regulated protein 1	response to ischemia;receptor-mediated endocytosis;endoplasmic reticulum unfolded protein response;response to endoplasmic reticulum stress;IRE1-mediated unfolded protein response;cellular protein metabolic process;cellular response to hypoxia;negative regulation of hypoxia-induced intrinsic apoptotic signaling pathway;negative regulation of endoplasmic reticulum stress-induced neuron intrinsic a…	extracellular region;endoplasmic reticulum;endoplasmic reticulum lumen;smooth endoplasmic reticulum;focal adhesion;membrane;endoplasmic reticulum chaperone complex;extracellular exosome;endocytic vesicle lumen;	2.515	2.827	1.965	2.262	3.061	3.126	3.232	3.127	-0.513	-0.459	-1.627	-1.342
Q93008	USP9X	Probable ubiquitin carboxyl-terminal hydrolase FAF-X	negative regulation of transcription from RNA polymerase II promoter;in utero embryonic development;neuron migration;transcription, DNA-templated;transcription initiation from RNA polymerase II promoter;chromosome segregation;mitotic nuclear division;transforming growth factor beta receptor signaling pathway;female gamete generation;post-embryonic development;gene expression;protein deubiquitinat…	cytoplasm;cytosol;membrane;growth cone;apical part of cell;	3.898	4.108	3.234	3.398	2.89	3.008	3.675	3.582	-0.743	-0.676	-0.675	-0.444
Q07157	TJP1	Tight junction protein ZO-1	blastocyst formation;apoptotic process;cellular component disassembly involved in execution phase of apoptosis;cell-cell junction assembly;sensory perception of sound;programmed cell death;hippo signaling;membrane organization;establishment of endothelial intestinal barrier;cell-cell signaling involved in cell-cell junction organization;	nucleus;cytoplasm;cytosol;plasma membrane;cell-cell adherens junction;gap junction;bicellular tight junction;intercalated disc;basolateral plasma membrane;apical plasma membrane;apicolateral plasma membrane;cell junction;apical junction complex;apical part of cell;intercellular canaliculus;	3.674	3.66	2.739	2.883	2.895	3.002	3.853	3.755	-1.245	-1.117	-1.548	-1.504
Q5JSZ5	PRRC2B	Protein PRRC2B			3.863	3.955	3.477	3.648	2.822	2.896	3.553	3.414	-0.624	-0.537	-0.775	-0.591
Q8TDD1	DDX54	ATP-dependent RNA helicase DDX54	transcription, DNA-templated;regulation of transcription, DNA-templated;RNA processing;RNA secondary structure unwinding;RNA metabolic process;intracellular estrogen receptor signaling pathway;negative regulation of nucleic acid-templated transcription;	nucleus;nucleolus;membrane;	1.459	1.603	3.808	3.871	1.425	1.534	1.889	1.837	-0.062	-0.016	-0.574	-0.372
P46939	UTRN	Utrophin	positive regulation of cell-matrix adhesion;muscle contraction;muscle organ development;regulation of sodium ion transmembrane transporter activity;	nucleoplasm;cytoplasm;cytoskeleton;plasma membrane;dystrophin-associated glycoprotein complex;membrane;cell junction;filopodium;filopodium membrane;neuromuscular junction;sarcolemma;protein complex;postsynaptic membrane;extracellular exosome;contractile ring;	3.101	3.293	2.857	2.98	2.602	2.702	3.602	3.474	-1.091	-0.977	-1.354	-1.231
Q8WWM7	ATXN2L	Ataxin-2-like protein	regulation of cytoplasmic mRNA processing body assembly;stress granule assembly;	cytoplasm;cytoplasmic stress granule;membrane;nuclear speck;	4.501	4.556	3.615	3.749	3.16	3.29	3.826	3.671	-0.775	-0.692	-0.825	-0.702
P13639	EEF2	Elongation factor 2	hematopoietic progenitor cell differentiation;translation;translational elongation;gene expression;peptidyl-diphthamide biosynthetic process from peptidyl-histidine;post-translational protein modification;cellular protein metabolic process;positive regulation of translation;	nucleus;cytoplasm;cytosol;polysome;plasma membrane;membrane;aggresome;ribonucleoprotein complex;extracellular exosome;	3.285	3.414	3.468	3.661	2.77	2.844	3.455	3.417	-0.771	-0.671	-0.856	-0.656
O75533	SF3B1	Splicing factor 3B subunit 1	RNA splicing, via transesterification reactions;mRNA splicing, via spliceosome;blastocyst formation;RNA splicing;anterior/posterior pattern specification;gene expression;	chromatin;nucleus;nucleoplasm;spliceosomal complex;U12-type spliceosomal complex;nuclear matrix;nuclear speck;small nuclear ribonucleoprotein complex;catalytic step 2 spliceosome;	2.64	2.769	3.78	3.985	2.505	2.548	2.946	2.799	-0.173	-0.118	-0.753	-0.609
Q6P2E9	EDC4	Enhancer of mRNA-decapping protein 4	nuclear-transcribed mRNA catabolic process, deadenylation-dependent decay;gene expression;exonucleolytic nuclear-transcribed mRNA catabolic process involved in deadenylation-dependent decay;	cytoplasmic mRNA processing body;nucleus;nucleoplasm;cytoplasm;cytosol;membrane;intracellular membrane-bounded organelle;	3.699	3.805	3.407	3.626	2.944	3.018	3.768	3.664	-1.038	-0.932	-1.272	-1.05
Q8WUM4	PDCD6IP	Programmed cell death 6-interacting protein	cell separation after cytokinesis;apoptotic process;regulation of centrosome duplication;protein transport;viral process;viral life cycle;viral budding via host ESCRT complex;ubiquitin-independent protein catabolic process via the multivesicular body sorting pathway;positive regulation of exosomal secretion;regulation of extracellular exosome assembly;positive regulation of extracellular exosome …	immunological synapse;cytoplasm;microtubule organizing center;cytosol;focal adhesion;membrane;melanosome;myelin sheath;extracellular exosome;endoplasmic reticulum exit site;extracellular vesicle;	4.464	4.562	3.25	3.354	3.277	3.326	3.929	3.778	-0.831	-0.797	-0.954	-0.762
A0A0C4DGG9	CHD4	Chromodomain-helicase-DNA-binding protein 4	chromatin organization;regulation of transcription, DNA-templated;metabolic process;spindle assembly;	NuRD complex;	2.975	3.136	3.72	3.774	2.719	2.786	3.053	2.929	-0.296	-0.222	-0.807	-0.579
P13645	KRT10	Keratin, type I cytoskeletal 10	keratinocyte differentiation;cellular response to calcium ion;	extracellular space;nucleus;cytoplasm;intermediate filament;membrane;keratin filament;extracellular exosome;	0.196	0.324	0.001	0.13	-0.232	-0.659	1.548	1.446	0.147	-0.159	0.017	0.241
P22626	HNRNPA2B1	Heterogeneous nuclear ribonucleoproteins A2/B1	negative regulation of transcription from RNA polymerase II promoter;mRNA splicing, via spliceosome;mRNA processing;RNA splicing;gene expression;negative regulation of mRNA splicing, via spliceosome;RNA transport;	nucleus;nucleoplasm;spliceosomal complex;cytoplasm;membrane;ribonucleoprotein complex;catalytic step 2 spliceosome;	2.575	2.596	3.392	3.352	2.476	2.564	2.803	2.619	-0.192	-0.156	-0.888	-0.808
O75179	ANKRD17	Ankyrin repeat domain-containing protein 17	blood vessel maturation;regulation of DNA replication;viral process;defense response to bacterium;positive regulation of I-kappaB kinase/NF-kappaB signaling;innate immune response;positive regulation of cell cycle;negative regulation of smooth muscle cell differentiation;positive regulation of G1/S transition of mitotic cell cycle;positive regulation of MDA-5 signaling pathway;positive regulation…	chromatin;nucleus;cytoplasm;membrane;	3.641	3.803	3.577	3.842	2.701	2.792	3.354	3.304	-0.748	-0.652	-0.688	-0.455
O15042	U2SURP	U2 snRNP-associated SURP motif-containing protein	RNA processing;	nucleus;nucleoplasm;	2.105	2.299	1.048	1.204	2.298	2.396	2.542	2.376	-0.096	0.022	-0.543	-0.321
Q9Y5B9	SUPT16H	FACT complex subunit SPT16	DNA replication;DNA repair;nucleosome disassembly;transcription from RNA polymerase II promoter;transcription elongation from RNA polymerase II promoter;gene expression;viral process;positive regulation of DNA-templated transcription, elongation;positive regulation of viral transcription;	nucleus;nucleoplasm;chromosome;	2.637	2.757	3.236	3.359	2.387	2.484	2.882	2.797	-0.285	-0.254	-0.679	-0.494
P11940	PABPC1	Polyadenylate-binding protein 1	nuclear-transcribed mRNA catabolic process, nonsense-mediated decay;nuclear-transcribed mRNA catabolic process, deadenylation-dependent decay;nuclear-transcribed mRNA poly(A) tail shortening;mRNA splicing, via spliceosome;mRNA polyadenylation;translation;translational initiation;gene expression;gene silencing by RNA;cellular protein metabolic process;positive regulation of translation;mRNA stabil…	nucleus;cytoplasm;cytosol;focal adhesion;cytoplasmic stress granule;membrane;ribonucleoprotein complex;cytoplasmic ribonucleoprotein granule;extracellular exosome;catalytic step 2 spliceosome;	4.21	4.294	3.378	3.504	3.222	3.331	3.934	3.849	-1.07	-1.02	-1.395	-1.237
Q8N3C0	ASCC3	Activating signal cointegrator 1 complex subunit 3	DNA repair;DNA dealkylation involved in DNA repair;transcription, DNA-templated;regulation of transcription, DNA-templated;cell proliferation;DNA duplex unwinding;	intracellular;nucleus;nucleoplasm;cytoplasm;Golgi apparatus;membrane;	3.435	3.62	3.372	3.513	2.822	2.861	3.348	3.249	-0.447	-0.369	-0.54	-0.281
P61978-3	HNRNPK	Isoform 3 of Heterogeneous nuclear ribonucleoprotein K	mRNA splicing, via spliceosome;transcription from RNA polymerase II promoter;RNA processing;signal transduction;RNA splicing;gene expression;regulation of low-density lipoprotein particle clearance;viral process;positive regulation of low-density lipoprotein particle receptor biosynthetic process;positive regulation of transcription from RNA polymerase II promoter;positive regulation of receptor-…	nuclear chromatin;podosome;nucleus;nucleoplasm;cytoplasm;focal adhesion;membrane;cell projection;extracellular exosome;catalytic step 2 spliceosome;	2.713	2.788	3.718	3.685	2.552	2.596	2.86	2.676	-0.125	-0.098	-0.812	-0.7
Q5SW79	CEP170	Centrosomal protein of 170 kDa		cytoplasm;centrosome;centriole;spindle;microtubule;nuclear membrane;	3.56	3.599	3.295	3.368	2.887	3.054	3.417	3.198	-0.583	-0.476	-0.956	-0.87
P02545	LMNA	Prelamin-A/C	mitotic cell cycle;apoptotic process;cellular component disassembly involved in execution phase of apoptosis;mitotic nuclear envelope disassembly;mitotic nuclear envelope reassembly;spermatogenesis;muscle organ development;programmed cell death;regulation of cell migration;establishment or maintenance of microtubule cytoskeleton polarity;endoplasmic reticulum unfolded protein response;protein loc…	nucleus;nuclear envelope;lamin filament;nuclear lamina;nucleoplasm;cytoplasm;cytosol;intermediate filament;nuclear matrix;nuclear speck;nuclear membrane;perinuclear region of cytoplasm;	2.293	2.397	3.47	3.517	2.323	2.414	2.69	2.511	-0.032	0.042	-0.488	-0.365
P35527	KRT9	Keratin, type I cytoskeletal 9	spermatogenesis;epidermis development;skin development;intermediate filament organization;	extracellular space;nucleus;intermediate filament;membrane;extracellular exosome;	-0.057	0.198	-0.639	-0.311	0.33	0.151	1.48	1.153	0.291	0.058	0.059	0.365
Q00839	HNRNPU	Heterogeneous nuclear ribonucleoprotein U	mRNA splicing, via spliceosome;osteoblast differentiation;RNA processing;RNA splicing;gene expression;circadian regulation of gene expression;CRD-mediated mRNA stabilization;	nucleus;nucleoplasm;cell surface;membrane;ribonucleoprotein complex;cytoplasmic ribonucleoprotein granule;CRD-mediated mRNA stability complex;catalytic step 2 spliceosome;	2.568	2.763	3.668	3.853	2.561	2.624	2.893	2.825	-0.069	-0.034	-0.641	-0.479
Q96GQ7	DDX27	Probable ATP-dependent RNA helicase DDX27	RNA secondary structure unwinding;	nucleus;	1.276	1.473	4.158	4.317	1.291	1.283	1.759	1.758	-0.106	-0.106	-0.637	-0.408
P38159	RBMX	RNA-binding motif protein, X chromosome	regulation of alternative mRNA splicing, via spliceosome;mRNA splicing, via spliceosome;osteoblast differentiation;transcription from RNA polymerase II promoter;mRNA splice site selection;membrane protein ectodomain proteolysis;RNA splicing;gene expression;positive regulation of transcription from RNA polymerase II promoter;negative regulation of mRNA splicing, via spliceosome;positive regulation…	extracellular space;nucleus;nucleoplasm;nuclear euchromatin;membrane;ribonucleoprotein complex;supraspliceosomal complex;extracellular exosome;catalytic step 2 spliceosome;	1.928	1.888	2.588	2.517	2.475	2.563	2.656	2.306	0.184	0.355	-0.908	-0.977
P08238	HSP90AB1	Heat shock protein HSP 90-beta	placenta development;protein folding;response to unfolded protein;axon guidance;response to salt stress;virion attachment to host cell;positive regulation of protein binding;negative regulation of proteasomal ubiquitin-dependent protein catabolic process;positive regulation of protein import into nucleus, translocation;cellular response to heat;nucleotide-binding domain, leucine rich repeat conta…	nucleoplasm;cytoplasm;mitochondrion;cytosol;cell surface;membrane;inclusion body;basolateral plasma membrane;apical plasma membrane;brush border membrane;melanosome;extracellular exosome;COP9 signalosome;	2.764	2.938	2.894	3.036	2.703	2.801	3.198	3.08	-0.462	-0.411	-1	-0.872
P19338	NCL	Nucleolin	angiogenesis;endocytosis;spermatogenesis;positive regulation of tumor necrosis factor production;negative regulation of apoptotic process;positive regulation of transcription from RNA polymerase II promoter;cellular response to lipopolysaccharide;liver regeneration;positive regulation of transcription of nuclear large rRNA transcript from RNA polymerase I promoter;regulation of rRNA processing;po…	fibrillar center;dense fibrillar component;nucleus;nucleoplasm;nucleolus;cell cortex;cell surface;membrane;ribonucleoprotein complex;cytoplasmic ribonucleoprotein granule;extracellular exosome;	2.784	3.083	2.506	2.776	2.812	2.91	3.226	3.08	-0.367	-0.3	-0.839	-0.558
Q9BZE4	GTPBP4	Nucleolar GTP-binding protein 1	regulation of cyclin-dependent protein serine/threonine kinase activity;osteoblast differentiation;negative regulation of DNA replication;negative regulation of cell proliferation;negative regulation of cell-cell adhesion;negative regulation of cell migration;negative regulation of protein ubiquitination;negative regulation of collagen binding;ribosome biogenesis;protein stabilization;	nucleus;nucleolus;cytoplasm;Golgi apparatus;membrane;nuclear membrane;perinuclear region of cytoplasm;	2.458	2.58	3.775	3.837	2.268	2.337	2.646	2.546	-0.17	-0.144	-0.634	-0.461
P18206	VCL	Vinculin	morphogenesis of an epithelium;platelet degranulation;movement of cell or subcellular component;muscle contraction;cell adhesion;cell-matrix adhesion;blood coagulation;lamellipodium assembly;platelet activation;negative regulation of cell migration;adherens junction assembly;protein localization to cell surface;apical junction assembly;axon extension;platelet aggregation;epithelial cell-cell adhe…	extracellular region;cell;cytosol;cytoskeleton;plasma membrane;brush border;cell-cell junction;adherens junction;cell-cell adherens junction;zonula adherens;fascia adherens;focal adhesion;actin cytoskeleton;cell-substrate junction;costamere;protein complex;membrane raft;extracellular exosome;outer dense plaque of desmosome;inner dense plaque of desmosome;extracellular vesicle;terminal web;	3.409	3.567	3.117	3.272	2.897	3.009	3.81	3.724	-1.304	-1.234	-1.777	-1.596
O14980	XPO1	Exportin-1	ribosomal large subunit export from nucleus;ribosomal small subunit export from nucleus;negative regulation of transcription from RNA polymerase II promoter;mitotic cell cycle;protein export from nucleus;transforming growth factor beta receptor signaling pathway;small GTPase mediated signal transduction;gene expression;regulation of centrosome duplication;viral process;viral life cycle;negative r…	kinetochore;nucleus;nuclear envelope;annulate lamellae;nucleoplasm;nucleolus;cytoplasm;cytosol;Cajal body;membrane;ribonucleoprotein complex;nuclear membrane;intracellular membrane-bounded organelle;	3.675	3.841	3.321	3.621	2.949	3.058	3.725	3.611	-0.974	-0.854	-1.271	-0.938
Q92945	KHSRP	Far upstream element-binding protein 2	RNA splicing, via transesterification reactions;transcription, DNA-templated;regulation of transcription, DNA-templated;mRNA processing;mRNA catabolic process;RNA splicing;gene expression;mRNA transport;regulation of miRNA metabolic process;	nucleoplasm;cytosol;cytoplasmic stress granule;membrane;	3.405	3.447	3.728	3.867	2.867	2.97	3.279	3.181	-0.376	-0.294	-0.765	-0.776
P23246	SFPQ	Splicing factor, proline- and glutamine-rich	negative regulation of transcription from RNA polymerase II promoter;alternative mRNA splicing, via spliceosome;double-strand break repair via homologous recombination;transcription, DNA-templated;mRNA processing;RNA splicing;regulation of circadian rhythm;negative regulation of circadian rhythm;positive regulation of sister chromatid cohesion;negative regulation of transcription, DNA-templated;r…	chromatin;nucleus;nucleoplasm;cytoplasm;nuclear matrix;paraspeckles;RNA polymerase II transcription factor complex;	2.514	2.52	3.259	3.281	2.246	2.315	2.696	2.56	-0.201	-0.123	-0.709	-0.693
Q13428-3	TCOF1	Isoform 3 of Treacle protein	skeletal system development;transport;transcription of nuclear large rRNA transcript from RNA polymerase I promoter;	nucleus;nucleolus;cytoplasm;	2.345	2.437	1.002	1.05	2.403	2.453	2.682	2.46	-0.095	0.009	-0.461	-0.43
C9J2Y9	POLR2B	DNA-directed RNA polymerase subunit beta	transcription from RNA polymerase II promoter;	nucleoplasm;	2.987	3.217	3.721	3.911	2.605	2.694	3.007	2.92	-0.222	-0.165	-0.705	-0.46
Q9NZI8	IGF2BP1	Insulin-like growth factor 2 mRNA-binding protein 1	gene expression;regulation of mRNA stability involved in response to stress;negative regulation of translation;pallium cell proliferation in forebrain;regulation of cytokine biosynthetic process;mRNA transport;CRD-mediated mRNA stabilization;neuronal stem cell maintenance;	nucleus;cytoplasm;cytosol;cytoplasmic stress granule;lamellipodium;filopodium;axon;growth cone;ribonucleoprotein complex;dendritic spine;perinuclear region of cytoplasm;CRD-mediated mRNA stability complex;	2.795	2.945	4.026	4.162	2.541	2.608	2.928	2.837	-0.337	-0.261	-0.752	-0.59
Q5T4S7	UBR4	E3 ubiquitin-protein ligase UBR4	viral process;protein ubiquitination involved in ubiquitin-dependent protein catabolic process;	nucleoplasm;cytoplasm;centrosome;membrane;integral component of membrane;	3.361	3.494	2.813	2.981	2.618	2.723	3.306	3.163	-0.592	-0.6	-0.543	-0.337
Q8WTT2	NOC3L	Nucleolar complex protein 3 homolog	fat cell differentiation;	nucleus;nucleolus;nuclear speck;	0.908	1.095	4.358	4.355	1.21	1.215	1.635	1.553	-0.182	-0.174	-0.487	-0.284
Q14692	BMS1	Ribosome biogenesis protein BMS1 homolog	ribosome assembly;	nucleus;nucleolus;	2.961	3.158	3.989	4.176	2.589	2.688	2.992	2.875	-0.07	-0.035	-0.586	-0.328
Q15058	KIF14	Kinesin-like protein KIF14	regulation of cell growth;microtubule-based movement;mitotic metaphase plate congression;small GTPase mediated signal transduction;positive regulation of cell proliferation;regulation of G2/M transition of mitotic cell cycle;cerebellar granular layer structural organization;cerebellar Purkinje cell layer structural organization;cerebellar cortex development;hippocampus development;olfactory bulb …	nucleus;cytosol;kinesin complex;microtubule;membrane;midbody;spindle midzone;plasma membrane;	3.801	4.042	3.564	3.7	3.103	3.169	3.678	3.376	-0.587	-0.546	-0.885	-0.65
Q9NZB2	FAM120A	Constitutive coactivator of PPAR-gamma-like protein 1		cytoplasm;plasma membrane;membrane;	3.67	3.79	3.695	3.808	2.668	2.775	3.494	3.238	-0.657	-0.566	-0.759	-0.663
Q14157	UBAP2L	Ubiquitin-associated protein 2-like	binding of sperm to zona pellucida;hematopoietic stem cell homeostasis;	PcG protein complex;Ada2/Gcn5/Ada3 transcription activator complex;	4.247	4.262	3.447	3.559	3.337	3.435	3.845	3.794	-0.984	-0.907	-1.384	-1.28
P12956	XRCC6	X-ray repair cross-complementing protein 6	telomere maintenance;DNA ligation;DNA repair;double-strand break repair;double-strand break repair via nonhomologous end joining;DNA recombination;transcription, DNA-templated;viral process;positive regulation of type I interferon production;DNA duplex unwinding;innate immune response;negative regulation of transcription, DNA-templated;positive regulation of transcription, DNA-templated;positive …	nuclear telomere cap complex;nucleus;nucleoplasm;transcription factor complex;cytosol;membrane;Ku70:Ku80 complex;nonhomologous end joining complex;	2.633	2.906	4.085	4.251	2.761	2.82	2.957	2.85	-0.199	-0.173	-0.932	-0.627
P11387	TOP1	DNA topoisomerase 1	DNA replication;DNA topological change;chromatin remodeling;chromosome segregation;circadian rhythm;programmed cell death;viral process;phosphorylation;circadian regulation of gene expression;embryonic cleavage;response to drug;	cytoplasmic mRNA processing body;nucleus;nucleoplasm;nucleolus;replication fork protection complex;perikaryon;nuclear chromosome;	2.811	3.046	1.077	1.347	2.629	2.701	2.878	2.764	-0.218	-0.173	-0.858	-0.652
O43390	HNRNPR	Heterogeneous nuclear ribonucleoprotein R	mRNA splicing, via spliceosome;mRNA processing;RNA splicing;gene expression;	nucleoplasm;spliceosomal complex;cytoplasm;ribonucleoprotein complex;catalytic step 2 spliceosome;nucleolus;	3.064	3.332	4.005	4.193	2.889	2.96	3.291	3.193	-0.546	-0.502	-1.166	-0.93
Q9H3S7	PTPN23	Tyrosine-protein phosphatase non-receptor type 23	negative regulation of epithelial cell migration;protein transport;peptidyl-tyrosine dephosphorylation;ubiquitin-dependent protein catabolic process via the multivesicular body sorting pathway;cilium morphogenesis;positive regulation of homophilic cell adhesion;positive regulation of adherens junction organization;positive regulation of early endosome to late endosome transport;	nucleus;nucleoplasm;cytoplasm;endosome;early endosome;cytoplasmic membrane-bounded vesicle;ciliary basal body;extracellular exosome;	3.685	3.853	2.655	2.717	2.643	2.672	3.404	3.281	-0.642	-0.514	-0.624	-0.413
P41252	IARS	Isoleucine--tRNA ligase, cytoplasmic	osteoblast differentiation;tRNA aminoacylation for protein translation;isoleucyl-tRNA aminoacylation;regulation of translational fidelity;gene expression;	nucleoplasm;cytoplasm;cytosol;membrane;extracellular exosome;	3.073	3.251	3.094	3.267	2.553	2.662	3.291	3.234	-0.644	-0.581	-0.811	-0.553
P24928	POLR2A	DNA-directed RNA polymerase II subunit RPB1	mRNA splicing, via spliceosome;transcription, RNA-templated;DNA repair;transcription-coupled nucleotide-excision repair;nucleotide-excision repair;regulation of transcription, DNA-templated;transcription from RNA polymerase II promoter;transcription initiation from RNA polymerase II promoter;transcription elongation from RNA polymerase II promoter;7-methylguanosine mRNA capping;RNA splicing;gene …	nucleus;nucleoplasm;DNA-directed RNA polymerase II, core complex;nucleolus;Prp19 complex;	2.985	3.189	3.76	3.853	2.526	2.568	2.929	2.779	-0.141	-0.06	-0.387	-0.264
A6NHR9	SMCHD1	Structural maintenance of chromosomes flexible hinge domain-containing protein 1	chromosome organization;inactivation of X chromosome by DNA methylation;	Barr body;	3.069	3.259	3.349	3.542	2.7	2.765	3.231	3.123	-0.308	-0.234	-0.59	-0.38
Q5JRA6	MIA3	Transport and Golgi organization protein 1 homolog	chondrocyte development;positive regulation of leukocyte migration;exocytosis;negative regulation of cell adhesion;protein transport;collagen fibril organization;negative regulation of cell migration;positive regulation of bone mineralization;wound healing;	endoplasmic reticulum membrane;membrane;integral component of membrane;intracellular membrane-bounded organelle;	4.324	4.46	3.219	3.331	3.089	3.142	3.442	3.303	-0.29	-0.267	-0.287	-0.076
Q12923	PTPN13	Tyrosine-protein phosphatase non-receptor type 13	protein dephosphorylation;regulation of phosphatidylinositol 3-kinase signaling;peptidyl-tyrosine dephosphorylation;	nucleus;cytoplasm;cytoskeleton;plasma membrane;lamellipodium;neuron projection;cell body;extracellular exosome;	3.604	3.762	3.387	3.545	2.721	2.768	3.687	3.607	-1.066	-0.978	-1.291	-1.056
P60842	EIF4A1	Eukaryotic initiation factor 4A-I	nuclear-transcribed mRNA catabolic process, deadenylation-dependent decay;nuclear-transcribed mRNA poly(A) tail shortening;translation;translational initiation;gene expression;regulation of gene expression;RNA secondary structure unwinding;viral process;cytokine-mediated signaling pathway;organ regeneration;cellular protein metabolic process;	cytoplasm;cytosol;membrane;eukaryotic translation initiation factor 4F complex;extracellular exosome;nucleus;	3.007	3.207	2.978	3.084	2.696	2.789	3.329	3.234	-0.772	-0.678	-1.16	-0.978
Q14671	PUM1	Pumilio homolog 1	post-Golgi vesicle-mediated transport;spermatogenesis;adult locomotory behavior;posttranscriptional gene silencing;stem cell differentiation;regulation of cell cycle;regulation of gene silencing by miRNA;membrane organization;mRNA destabilization;positive regulation of RIG-I signaling pathway;positive regulation of gene silencing by miRNA;	cytoplasmic mRNA processing body;cytosol;cytoplasmic stress granule;	4.022	4.231	3.548	3.629	2.945	3.066	3.763	3.586	-0.872	-0.793	-0.918	-0.86
O14654	IRS4	Insulin receptor substrate 4	signal transduction;insulin receptor signaling pathway;positive regulation of signal transduction;regulation of lipid metabolic process;	cytosol;plasma membrane;	3.559	3.767	2.912	2.988	2.818	2.87	3.561	3.447	-0.697	-0.642	-0.788	-0.679
O00203	AP3B1	AP-3 complex subunit beta-1	protein targeting to lysosome;intracellular protein transport;blood coagulation;anterograde axon cargo transport;melanosome organization;antigen processing and presentation, exogenous lipid antigen via MHC class Ib;anterograde synaptic vesicle transport;positive regulation of NK T cell differentiation;	lysosomal membrane;Golgi apparatus;membrane;AP-3 adaptor complex;clathrin-coated vesicle membrane;	3.124	3.316	2.764	2.917	2.743	2.822	3.142	3.03	-0.317	-0.269	-0.546	-0.298
A0A0A0MTC1	RNF213	E3 ubiquitin-protein ligase RNF213			3.303	3.479	3.399	3.452	2.515	2.596	3.326	3.212	-0.573	-0.482	-0.514	-0.306
Q99613	EIF3C	Eukaryotic translation initiation factor 3 subunit C	formation of translation preinitiation complex;translation;translational initiation;regulation of translational initiation;gene expression;cellular protein metabolic process;	cytosol;eukaryotic translation initiation factor 3 complex;eukaryotic 43S preinitiation complex;eukaryotic 48S preinitiation complex;	3.107	3.155	3.448	3.516	2.499	2.582	3.265	3.203	-0.82	-0.754	-1.103	-0.969
Q96I24	FUBP3	Far upstream element-binding protein 3	transcription, DNA-templated;transcription from RNA polymerase II promoter;positive regulation of gene expression;positive regulation of transcription, DNA-templated;positive regulation of transcription from RNA polymerase II promoter;	nucleus;cytoplasm;membrane;	3.346	3.499	3.43	3.606	2.875	2.991	3.494	3.371	-0.634	-0.559	-1.088	-0.923
Q9GZR7	DDX24	ATP-dependent RNA helicase DDX24	RNA secondary structure unwinding;RNA metabolic process;	nucleolus;membrane;	2.643	2.668	3.565	3.427	2.32	2.459	2.602	2.513	0.029	0.044	-0.512	-0.464
Q9P2J5	LARS	Leucine--tRNA ligase, cytoplasmic	tRNA aminoacylation for protein translation;leucyl-tRNA aminoacylation;regulation of translational fidelity;gene expression;methionyl-tRNA aminoacylation;	nucleus;cytoplasm;cytosol;	3.002	3.273	3.428	3.667	2.68	2.729	3.285	3.211	-0.586	-0.534	-0.929	-0.638
P11142	HSPA8	Heat shock cognate 71 kDa protein	mRNA splicing, via spliceosome;transcription, DNA-templated;protein folding;post-Golgi vesicle-mediated transport;response to unfolded protein;synaptic transmission;neurotransmitter secretion;axon guidance;RNA splicing;gene expression;viral process;cellular response to heat;protein refolding;negative regulation of transcription, DNA-templated;ATP metabolic process;positive regulation of mRNA spli…	Prp19 complex;extracellular space;intracellular;nucleus;nucleoplasm;spliceosomal complex;nucleolus;cytosol;plasma membrane;focal adhesion;membrane;ribonucleoprotein complex;melanosome;myelin sheath;clathrin-sculpted gamma-aminobutyric acid transport vesicle membrane;extracellular exosome;blood microparticle;ubiquitin ligase complex;	3.025	3.235	2.922	3.1	2.838	2.913	3.505	3.441	-0.817	-0.767	-1.249	-1.086
Q9BVJ6	UTP14A	U3 small nucleolar RNA-associated protein 14 homolog A	rRNA processing;	nucleolus;small-subunit processome;	2.658	2.857	3.915	4.226	2.598	2.61	3.037	2.907	-0.39	-0.377	-1.058	-0.729
P26599	PTBP1	Polypyrimidine tract-binding protein 1	alternative mRNA splicing, via spliceosome;regulation of alternative mRNA splicing, via spliceosome;mRNA splicing, via spliceosome;mRNA processing;RNA splicing;gene expression;negative regulation of RNA splicing;positive regulation of transcription from RNA polymerase II promoter;negative regulation of mRNA splicing, via spliceosome;negative regulation of muscle cell differentiation;	nucleoplasm;nucleolus;membrane;extracellular exosome;	2.827	3.011	3.521	3.842	2.648	2.727	3.035	2.938	-0.32	-0.263	-0.969	-0.632
P36578	RPL4	60S ribosomal protein L4	nuclear-transcribed mRNA catabolic process, nonsense-mediated decay;cytoplasmic translation;translation;translational initiation;translational elongation;translational termination;SRP-dependent cotranslational protein targeting to membrane;gene expression;viral process;viral life cycle;viral transcription;cellular protein metabolic process;	nucleus;nucleolus;cytoplasm;cytosol;focal adhesion;membrane;cytosolic large ribosomal subunit;ribonucleoprotein complex;extracellular exosome;	2.509	2.585	4.415	4.465	2.216	2.307	2.495	2.307	0.081	0.147	-0.151	0.005
Q08945	SSRP1	FACT complex subunit SSRP1	DNA replication;DNA repair;chromatin remodeling;regulation of transcription, DNA-templated;transcription from RNA polymerase II promoter;transcription elongation from RNA polymerase II promoter;gene expression;viral process;positive regulation of viral transcription;	nucleus;nucleoplasm;chromosome;nucleolus;cytoplasm;	2.996	3.207	1.834	2.119	2.853	2.925	3.132	3.055	-0.248	-0.173	-0.616	-0.377
P35658	NUP214	Nuclear pore complex protein Nup214	mitotic cell cycle;carbohydrate metabolic process;mRNA export from nucleus;protein import into nucleus;protein export from nucleus;mitotic nuclear envelope disassembly;hexose transport;gene expression;regulation of glucose transport;glucose transport;viral process;protein sumoylation;viral life cycle;viral transcription;cytokine-mediated signaling pathway;cellular response to heat;post-translatio…	nucleus;nuclear pore;nucleoplasm;cytosol;focal adhesion;intracellular membrane-bounded organelle;	3.692	3.812	3.275	3.414	2.962	3.078	3.563	3.484	-0.707	-0.671	-0.983	-0.797
O75122-3	CLASP2	Isoform 3 of CLIP-associating protein 2	microtubule cytoskeleton organization;mitotic cell cycle;vesicle targeting;microtubule nucleation;negative regulation of microtubule depolymerization;Golgi organization;mitotic nuclear division;establishment or maintenance of cell polarity;small GTPase mediated signal transduction;axon guidance;regulation of gastrulation;positive regulation of epithelial cell migration;regulation of epithelial to…	condensed chromosome kinetochore;cytoplasm;Golgi apparatus;trans-Golgi network;microtubule organizing center;kinetochore microtubule;cytosol;microtubule;cytoplasmic microtubule;plasma membrane;cell cortex;membrane;cell leading edge;ruffle membrane;basal cortex;microtubule;focal adhesion;	3.736	3.835	3.333	3.388	2.906	2.993	3.665	3.492	-0.599	-0.508	-0.826	-0.728
Q14160	SCRIB	Protein scribble homolog	neural tube closure;positive regulation of receptor recycling;asymmetric protein localization;cell proliferation;viral process;synaptic vesicle targeting;single organismal cell-cell adhesion;cell migration;cochlear nucleus development;establishment of apical/basal cell polarity;wound healing;positive regulation of apoptotic process;astrocyte cell migration;negative regulation of mitotic cell cycl…	nucleoplasm;plasma membrane;cell-cell junction;cell-cell adherens junction;basolateral plasma membrane;lamellipodium;Scrib-APC-beta-catenin complex;myelin sheath abaxonal region;extracellular exosome;plasma membrane;cell leading edge;presynaptic membrane;postsynaptic membrane;	3.16	3.261	2.764	3.025	2.599	2.769	3.703	3.614	-1.238	-1.085	-1.604	-1.436
Q8NI27	THOC2	THO complex subunit 2	mRNA processing;mRNA export from nucleus;RNA splicing;poly(A)+ mRNA export from nucleus;viral mRNA export from host cell nucleus;	transcription export complex;THO complex;THO complex part of transcription export complex;nucleoplasm;nuclear speck;	2.932	3.122	2.013	2.28	2.767	2.872	2.973	2.789	-0.18	-0.125	-0.8	-0.575
P10809	HSPD1	60 kDa heat shock protein, mitochondrial	response to hypoxia;detection of misfolded protein;B cell cytokine production;MyD88-dependent toll-like receptor signaling pathway;positive regulation of T cell mediated immune response to tumor cell;'de novo' protein folding;activation of cysteine-type endopeptidase activity involved in apoptotic process;response to unfolded protein;response to heat;response to cold;viral process;response to lip…	extracellular space;cytoplasm;mitochondrion;mitochondrial inner membrane;mitochondrial matrix;early endosome;rough endoplasmic reticulum;Golgi apparatus;cytosol;plasma membrane;coated pit;cell surface;membrane;mitochondrial crista;coated vesicle;secretory granule;zymogen granule;myelin sheath;protein complex;membrane raft;lipopolysaccharide receptor complex;extracellular exosome;cyclin-dependent …	2.238	2.421	3.12	3.255	2.515	2.604	2.755	2.635	0.097	0.136	-0.625	-0.37
O15078	CEP290	Centrosomal protein of 290 kDa	G2/M transition of mitotic cell cycle;mitotic cell cycle;organelle organization;establishment or maintenance of cell polarity;protein transport;regulation of cAMP metabolic process;hindbrain development;otic vesicle formation;cilium assembly;eye photoreceptor cell development;photoreceptor cell maintenance;positive regulation of transcription, DNA-templated;pronephros development;retina developme…	photoreceptor outer segment;nucleus;cytoplasm;centrosome;cytosol;membrane;photoreceptor connecting cilium;centriolar satellite;ciliary transition zone;TCTN-B9D complex;protein complex;gamma-tubulin complex;centrosome;	3.832	3.998	3.488	3.666	3.012	3.062	3.605	3.335	-0.394	-0.339	-0.731	-0.541
P49588	AARS	Alanine--tRNA ligase, cytoplasmic	hair follicle development;tRNA modification;tRNA aminoacylation for protein translation;alanyl-tRNA aminoacylation;regulation of translational fidelity;protein folding;tRNA processing;gene expression;cerebellar Purkinje cell layer development;endoplasmic reticulum unfolded protein response;response to amino acid;negative regulation of neuron apoptotic process;neuromuscular process controlling bal…	cytoplasm;cytosol;membrane;extracellular exosome;	3.422	3.623	3.3	3.436	2.912	3.031	3.624	3.549	-0.907	-0.819	-1.206	-0.996
O75534	CSDE1	Cold shock domain-containing protein E1	regulation of transcription, DNA-templated;male gonad development;nuclear-transcribed mRNA catabolic process, no-go decay;	cytoplasm;mitochondrial inner membrane;Golgi apparatus;plasma membrane;CRD-mediated mRNA stability complex;	3.3	3.362	3.711	3.814	2.812	2.938	3.408	3.397	-0.738	-0.704	-1.079	-0.904
Q07954	LRP1	Prolow-density lipoprotein receptor-related protein 1	retinoid metabolic process;receptor-mediated endocytosis;protein kinase C-activating G-protein coupled receptor signaling pathway;aging;phototransduction, visible light;cell proliferation;positive regulation of cholesterol efflux;negative regulation of neuron projection development;negative regulation of smooth muscle cell migration;negative regulation of Wnt signaling pathway;positive regulation…	nucleolus;cytoplasm;lysosomal membrane;endosome;plasma membrane;integral component of plasma membrane;coated pit;focal adhesion;clathrin-coated vesicle;dendrite;endocytic vesicle membrane;neuronal cell body;receptor complex;	2.807	3.019	3.017	3.263	2.38	2.467	3	2.813	-0.255	-0.205	-0.572	-0.283
O43143	DHX15	Pre-mRNA-splicing factor ATP-dependent RNA helicase DHX15	mRNA processing;RNA splicing;	nucleus;nucleoplasm;U12-type spliceosomal complex;nucleolus;cytoplasm;U2-type post-mRNA release spliceosomal complex;	3.027	3.317	3.599	3.805	2.697	2.784	3.128	3.003	-0.338	-0.271	-0.763	-0.481
P53992	SEC24C	Protein transport protein Sec24C	antigen processing and presentation of peptide antigen via MHC class I;intracellular protein transport;ER to Golgi vesicle-mediated transport;protein N-linked glycosylation via asparagine;antigen processing and presentation of exogenous peptide antigen via MHC class II;post-translational protein modification;cellular protein metabolic process;small molecule metabolic process;COPII vesicle coating…	Golgi membrane;endoplasmic reticulum membrane;cytosol;ER to Golgi transport vesicle membrane;COPII vesicle coat;perinuclear region of cytoplasm;	4.75	4.92	2.464	2.67	3.14	3.267	3.83	3.784	-0.633	-0.511	-0.482	-0.216
Q9BUQ8	DDX23	Probable ATP-dependent RNA helicase DDX23	cis assembly of pre-catalytic spliceosome;RNA splicing, via transesterification reactions;mRNA splicing, via spliceosome;RNA splicing;gene expression;RNA secondary structure unwinding;	nucleus;nucleoplasm;U5 snRNP;nucleolus;mitochondrion;plasma membrane;extracellular exosome;catalytic step 2 spliceosome;	2.998	3.182	1.162	1.34	2.404	2.535	2.801	2.751	-0.322	-0.289	-0.767	-0.532
Q14683	SMC1A	Structural maintenance of chromosomes protein 1A	mitotic sister chromatid segregation;mitotic cell cycle;mRNA splicing, via spliceosome;DNA repair;mitotic spindle organization;sister chromatid cohesion;mitotic sister chromatid cohesion;mitotic cell cycle checkpoint;meiotic nuclear division;RNA splicing;response to radiation;gene expression;protein sumoylation;stem cell maintenance;negative regulation of DNA endoreduplication;signal transduction…	chromosome, centromeric region;kinetochore;condensed chromosome kinetochore;condensed nuclear chromosome;nucleus;nucleoplasm;chromosome;nucleolus;cytoplasm;cytosol;cohesin core heterodimer;meiotic cohesin complex;	2.836	3.042	3.553	3.772	2.835	2.899	3.175	3.037	-0.27	-0.224	-0.862	-0.691
Q9Y2W1	THRAP3	Thyroid hormone receptor-associated protein 3	regulation of alternative mRNA splicing, via spliceosome;nuclear-transcribed mRNA catabolic process;transcription initiation from RNA polymerase II promoter;mRNA processing;circadian rhythm;RNA splicing;intracellular steroid hormone receptor signaling pathway;androgen receptor signaling pathway;positive regulation of circadian rhythm;positive regulation of transcription, DNA-templated;positive re…	nucleus;nucleoplasm;mediator complex;extracellular exosome;exon-exon junction complex;	2.599	2.608	1.364	1.347	2.38	2.528	2.769	2.52	-0.067	0.059	-0.22	-0.234
O00567	NOP56	Nucleolar protein 56	rRNA modification;rRNA processing;	nucleoplasm;nucleolus;small nucleolar ribonucleoprotein complex;cytoplasm;membrane;box C/D snoRNP complex;small-subunit processome;pre-snoRNP complex;	2.809	2.907	3.77	3.857	2.587	2.66	2.918	2.803	-0.148	-0.09	-0.685	-0.554
Q9BVP2	GNL3	Guanine nucleotide-binding protein-like 3	cell proliferation;regulation of cell proliferation;ribosome biogenesis;positive regulation of pri-miRNA transcription from RNA polymerase II promoter;	extracellular space;nucleus;nucleoplasm;nucleolus;membrane;	1.519	1.758	4.278	4.398	1.464	1.48	1.909	1.782	-0.112	-0.081	-0.661	-0.481
O94979	SEC31A	Protein transport protein Sec31A	antigen processing and presentation of peptide antigen via MHC class I;ER to Golgi vesicle-mediated transport;protein transport;protein N-linked glycosylation via asparagine;antigen processing and presentation of exogenous peptide antigen via MHC class II;endoplasmic reticulum unfolded protein response;IRE1-mediated unfolded protein response;post-translational protein modification;cellular protei…	Golgi membrane;cytoplasm;endoplasmic reticulum;endoplasmic reticulum membrane;cytosol;ER to Golgi transport vesicle membrane;vesicle coat;COPII vesicle coat;ER to Golgi transport vesicle;intracellular membrane-bounded organelle;perinuclear region of cytoplasm;endoplasmic reticulum exit site;	4.085	4.282	2.504	2.658	3.033	3.161	3.549	3.514	-0.525	-0.427	-0.519	-0.369
P42694	HELZ	Probable helicase with zinc finger domain	metabolic process;	nucleus;membrane;	3.575	3.723	3.182	3.387	2.711	2.826	3.578	3.52	-0.789	-0.729	-0.921	-0.682
P51991	HNRNPA3	Heterogeneous nuclear ribonucleoprotein A3	mRNA splicing, via spliceosome;RNA splicing;gene expression;mRNA transport;	nucleus;nucleoplasm;cytoplasm;ribonucleoprotein complex;ribonucleoprotein granule;neuron projection;catalytic step 2 spliceosome;	2.623	2.589	3.449	3.308	2.443	2.494	2.767	2.558	-0.171	-0.102	-0.85	-0.886
P46100	ATRX	Transcriptional regulator ATRX	DNA repair;DNA methylation;DNA recombination;nucleosome assembly;DNA replication-independent nucleosome assembly;chromatin remodeling;transcription, DNA-templated;regulation of transcription, DNA-templated;spermatogenesis;positive regulation of nuclear cell cycle DNA replication;DNA damage response, signal transduction by p53 class mediator;forebrain development;replication fork processing;positi…	nucleus;nucleoplasm;nuclear heterochromatin;PML body;telomeric heterochromatin;SWI/SNF superfamily-type complex;	2.756	2.892	2.874	2.955	2.472	2.546	2.873	2.726	-0.122	-0.052	-0.459	-0.255
Q9NW13	RBM28	RNA-binding protein 28	mRNA processing;RNA splicing;	spliceosomal complex;nucleolus;	2.57	2.744	4.252	4.333	2.564	2.615	2.714	2.558	-0.004	0.032	-0.651	-0.529
P17480	UBTF	Nucleolar transcription factor 1	chromatin silencing at rDNA;chromatin remodeling;regulation of transcription from RNA polymerase I promoter;transcription from RNA polymerase I promoter;transcription initiation from RNA polymerase I promoter;transcription elongation from RNA polymerase I promoter;termination of RNA polymerase I transcription;gene expression;regulation of gene expression, epigenetic;negative regulation of gene ex…	fibrillar center;nucleoplasm;nucleolus;	2.816	2.948	3.247	3.371	2.522	2.61	2.931	2.765	-0.003	0.06	-0.363	-0.251
P46087	NOP2	Probable 28S rRNA (cytosine(4447)-C(5))-methyltransferase	rRNA processing;positive regulation of cell proliferation;methylation;	nucleolus;	2.122	2.238	3.964	4.077	2.159	2.216	2.208	2.063	-0.016	0.012	-0.68	-0.611
Q9H307	PNN	Pinin	mRNA splicing, via spliceosome;transcription, DNA-templated;regulation of transcription, DNA-templated;cell adhesion;	nucleoplasm;intermediate filament;plasma membrane;cell-cell junction;membrane;nuclear speck;desmosome;catalytic step 2 spliceosome;exon-exon junction complex;	2.688	2.604	3.163	3.206	2.561	2.619	2.768	2.647	0.048	0.115	-0.214	-0.149
Q8WYP5	AHCTF1	Protein ELYS	mitotic cell cycle;cytokinesis;regulation of transcription, DNA-templated;small GTPase mediated signal transduction;protein transport;mRNA transport;nuclear pore complex assembly;	nucleus;nucleoplasm;cytosol;nuclear matrix;nuclear membrane;extracellular exosome;condensed chromosome kinetochore;chromatin;nuclear pore;nuclear pore outer ring;	3.177	3.301	3.443	3.559	2.605	2.644	3.155	3	-0.362	-0.256	-0.477	-0.381
Q9UPN4	CEP131	Centrosomal protein of 131 kDa	G2/M transition of mitotic cell cycle;mitotic cell cycle;organelle organization;multicellular organismal development;spermatogenesis;positive regulation of cell proliferation;regulation of centrosome duplication;cell differentiation;intraciliary transport involved in cilium morphogenesis;positive regulation of intracellular protein transport;	acrosomal vesicle;nucleus;nucleoplasm;centrosome;centriole;microtubule organizing center;cytosol;cilium;microtubule cytoskeleton;nuclear membrane;centriolar satellite;intracellular membrane-bounded organelle;intercellular bridge;centrosome;	3.953	3.835	3.36	3.358	2.946	3.003	3.37	3.057	-0.033	0.052	-0.193	-0.177
Q03701	CEBPZ	CCAAT/enhancer-binding protein zeta	transcription from RNA polymerase II promoter;positive regulation of transcription from RNA polymerase II promoter;	nucleus;	2.126	2.305	4.228	4.349	2.186	2.274	2.566	2.525	-0.309	-0.26	-0.882	-0.678
Q7Z2W4	ZC3HAV1	Zinc finger CCCH-type antiviral protein 1	metabolic process;response to virus;positive regulation of type I interferon production;positive regulation of interferon-alpha production;positive regulation of interferon-beta production;suppression by virus of host molecular function;positive regulation of I-kappaB kinase/NF-kappaB signaling;negative regulation of viral genome replication;innate immune response;regulation of defense response t…	nucleus;cytoplasm;lysosome;late endosome;Golgi apparatus;	4.121	4.167	3.46	3.546	3.178	3.306	3.723	3.562	-0.545	-0.431	-0.622	-0.535
Q12830	BPTF	Nucleosome-remodeling factor subunit BPTF	negative regulation of transcription from RNA polymerase II promoter;embryonic placenta development;chromatin remodeling;transcription, DNA-templated;regulation of transcription, DNA-templated;brain development;endoderm development;anterior/posterior pattern specification;positive regulation of transcription, DNA-templated;	nucleus;nucleoplasm;cytoplasm;NURF complex;extracellular exosome;	2.507	2.657	2.064	2.234	2.207	2.337	2.894	2.712	0.119	0.195	-0.046	0.178
P56192	MARS	Methionine--tRNA ligase, cytoplasmic	tRNA aminoacylation for protein translation;methionyl-tRNA aminoacylation;gene expression;	cytoplasm;mitochondrion;cytosol;membrane;extracellular exosome;	3.077	3.369	3.284	3.55	2.615	2.713	3.285	3.191	-0.698	-0.61	-0.996	-0.672
C9JZR2	CTNND1	Catenin delta-1	single organismal cell-cell adhesion;	plasma membrane;	3.407	3.506	2.747	2.81	2.688	2.85	3.811	3.651	-1.4	-1.269	-1.618	-1.563
Q14247	CTTN	Src substrate cortactin	intracellular protein transport;receptor-mediated endocytosis;substrate-dependent cell migration, cell extension;small GTPase mediated signal transduction;actin filament polymerization;regulation of axon extension;positive regulation of actin filament polymerization;actin cytoskeleton reorganization;positive regulation of smooth muscle contraction;focal adhesion assembly;neuron projection morphog…	ruffle;podosome;cytoplasm;cytoskeleton;coated pit;focal adhesion;cell cortex;lamellipodium;cortical cytoskeleton;dendritic spine;extracellular exosome;mitotic spindle midzone;actin filament;voltage-gated potassium channel complex;growth cone;	4.29	4.337	3.223	3.282	3.151	3.264	3.826	3.729	-0.689	-0.617	-0.884	-0.791
Q06787-6	FMR1	Isoform 5 of Synaptic functional regulator FMR1	central nervous system development;negative regulation of translation;negative regulation of translational initiation;mRNA transport;	nucleus;nucleoplasm;nucleolus;cytoplasm;polysome;mRNA cap binding complex;cytoplasmic stress granule;membrane;dendrite;cytoplasmic ribonucleoprotein granule;polysomal ribosome;	3.329	3.399	3.269	3.412	2.737	2.821	3.509	3.408	-0.823	-0.787	-1.13	-1.021
Q01780	EXOSC10	Exosome component 10	nuclear-transcribed mRNA catabolic process, nonsense-mediated decay;maturation of 5.8S rRNA;nuclear-transcribed mRNA catabolic process;dosage compensation by inactivation of X chromosome;nuclear mRNA surveillance;CUT catabolic process;nuclear polyadenylation-dependent rRNA catabolic process;histone mRNA catabolic process;nuclear retention of unspliced pre-mRNA at the site of transcription;RNA pho…	nuclear exosome (RNase complex);exosome (RNase complex);nucleus;nucleoplasm;nucleolus;cytoplasm;membrane;transcriptionally active chromatin;	2.879	3.051	4.027	4.096	2.605	2.689	2.952	2.829	-0.338	-0.276	-0.808	-0.566
Q8NE71	ABCF1	ATP-binding cassette sub-family F member 1	translation;translational initiation;inflammatory response;positive regulation of translation;transmembrane transport;ribosome biogenesis;	nuclear envelope;nucleoplasm;cytoplasm;cytosol;ribosome;membrane;polysomal ribosome;	3.032	3.153	3.877	4.019	2.73	2.763	3.18	3.045	-0.398	-0.358	-0.866	-0.725
Q5JTH9	RRP12	RRP12-like protein		nucleolus;integral component of membrane;nuclear membrane;	1.73	1.824	3.906	4.057	1.577	1.633	2.181	2.021	-0.111	-0.121	-0.341	-0.277
P53396	ACLY	ATP-citrate synthase	acetyl-CoA metabolic process;citrate metabolic process;energy reserve metabolic process;fatty acid biosynthetic process;lipid biosynthetic process;coenzyme A metabolic process;triglyceride biosynthetic process;positive regulation of cellular metabolic process;long-chain fatty-acyl-CoA biosynthetic process;cellular lipid metabolic process;cellular carbohydrate metabolic process;small molecule meta…	nucleoplasm;cytoplasm;mitochondrion;cytosol;plasma membrane;citrate lyase complex;membrane;extracellular exosome;	3.01	3.249	2.942	3.217	2.599	2.672	3.278	3.15	-0.383	-0.35	-0.593	-0.316
Q9H0A0	NAT10	RNA cytidine acetyltransferase	metabolic process;	nucleus;nucleolus;membrane;	2.596	2.779	3.66	3.79	2.41	2.463	2.777	2.698	-0.192	-0.173	-0.669	-0.403
Q9UIG0	BAZ1B	Tyrosine-protein kinase BAZ1B	heart morphogenesis;double-strand break repair;chromatin assembly or disassembly;transcription, DNA-templated;regulation of transcription, DNA-templated;cellular response to DNA damage stimulus;histone phosphorylation;peptidyl-tyrosine phosphorylation;chromatin-mediated maintenance of transcription;positive regulation of receptor activity;	condensed chromosome;pericentric heterochromatin;nuclear replication fork;	2.728	2.96	3.745	3.88	2.683	2.68	2.893	2.84	-0.232	-0.265	-0.985	-0.782
P07910-2	HNRNPC	Isoform C1 of Heterogeneous nuclear ribonucleoproteins C1/C2	mRNA splicing, via spliceosome;osteoblast differentiation;RNA splicing;gene expression;ATP-dependent chromatin remodeling;3'-UTR-mediated mRNA stabilization;	nuclear chromatin;nucleus;nucleoplasm;spliceosomal complex;cytosol;membrane;protein complex;extracellular exosome;catalytic step 2 spliceosome;	2.507	2.743	3.626	3.821	2.626	2.748	2.979	2.922	-0.568	-0.52	-1.292	-1.147
P23588	EIF4B	Eukaryotic translation initiation factor 4B	nuclear-transcribed mRNA catabolic process, deadenylation-dependent decay;nuclear-transcribed mRNA poly(A) tail shortening;translation;translational initiation;regulation of translational initiation;insulin receptor signaling pathway;gene expression;cellular protein metabolic process;	cytosol;eukaryotic translation initiation factor 4F complex;	3.868	3.804	3.035	2.904	2.872	3.073	3.778	3.444	-0.649	-0.45	-0.807	-0.925
Q6PD62	CTR9	RNA polymerase-associated protein CTR9 homolog	negative regulation of transcription from RNA polymerase II promoter;endodermal cell fate commitment;inner cell mass cell differentiation;trophectodermal cell differentiation;blastocyst growth;transcription, DNA-templated;JAK-STAT cascade;histone monoubiquitination;Wnt signaling pathway;stem cell maintenance;positive regulation of transcription elongation from RNA polymerase II promoter;histone H…	Cdc73/Paf1 complex;nuclear speck;transcriptionally active chromatin;	2.78	2.984	2.975	3.151	2.53	2.633	2.888	2.776	-0.137	-0.107	-0.541	-0.268
P53621	COPA	Coatomer subunit alpha	intracellular protein transport;retrograde vesicle-mediated transport, Golgi to ER;pancreatic juice secretion;COPI coating of Golgi vesicle;membrane organization;	extracellular space;cytoplasm;cytosol;membrane;COPI vesicle coat;extracellular exosome;	3.24	3.5	3.173	3.267	2.628	2.763	3.393	3.331	-0.558	-0.49	-0.602	-0.395
P33176	KIF5B	Kinesin-1 heavy chain	microtubule-based movement;cytoplasm organization;axon guidance;protein localization;cytoskeleton-dependent intracellular transport;positive regulation of synaptic transmission, GABAergic;stress granule disassembly;regulation of membrane potential;positive regulation of potassium ion transport;cellular protein metabolic process;vesicle transport along microtubule;plus-end-directed vesicle transpo…	cytoplasm;microtubule organizing center;kinesin complex;microtubule;membrane;endocytic vesicle;vesicle;ciliary rootlet;neuron projection;perinuclear region of cytoplasm;	2.964	3.156	2.813	2.955	2.316	2.49	3.294	3.191	-0.88	-0.755	-1.185	-1.119
Q13263	TRIM28	Transcription intermediary factor 1-beta	negative regulation of transcription from RNA polymerase II promoter;epithelial to mesenchymal transition;DNA repair;transcription initiation from RNA polymerase II promoter;embryo implantation;gene expression;protein ubiquitination;protein sumoylation;positive regulation of transcription factor import into nucleus;DNA methylation involved in embryo development;innate immune response;positive reg…	nucleus;nucleoplasm;nuclear euchromatin;nuclear heterochromatin;RNA polymerase II transcription factor complex;	3.211	3.494	3.684	3.927	2.995	3.119	3.387	3.236	-0.426	-0.358	-1.051	-0.745
F5H5D3	TUBA1C	Tubulin alpha chain	microtubule-based process;metabolic process;protein polymerization;	cytoplasm;microtubule;	3.701	3.923	3.046	3.255	3.028	3.167	3.876	3.841	-1.123	-1.035	-1.463	-1.233
Q96N67	DOCK7	Dedicator of cytokinesis protein 7	microtubule cytoskeleton organization;hematopoietic progenitor cell differentiation;small GTPase mediated signal transduction;axonogenesis;interkinetic nuclear migration;neuron projection development;positive regulation of peptidyl-serine phosphorylation;pigmentation;establishment of neuroblast polarity;regulation of neurogenesis;activation of GTPase activity;	focal adhesion;axon;growth cone;neuron projection;basal part of cell;COP9 signalosome;	3.426	3.587	3.065	3.271	2.803	2.852	3.599	3.461	-0.789	-0.781	-0.928	-0.761
O76094	SRP72	Signal recognition particle subunit SRP72	translation;SRP-dependent cotranslational protein targeting to membrane;gene expression;response to drug;cellular protein metabolic process;	nucleolus;cytoplasm;endoplasmic reticulum;signal recognition particle, endoplasmic reticulum targeting;cytosol;plasma membrane;	1.812	1.934	4.327	4.376	1.662	1.667	1.411	1.306	-0.202	-0.173	-0.562	-0.46
B0QY89	EIF3L	Eukaryotic translation initiation factor 3 subunit L	formation of translation preinitiation complex;regulation of translational initiation;	eukaryotic translation initiation factor 3 complex;eukaryotic 43S preinitiation complex;eukaryotic 48S preinitiation complex;	3.809	4.028	3.432	3.594	3.043	3.186	3.912	3.799	-1.223	-1.16	-1.444	-1.262
Q92499	DDX1	ATP-dependent RNA helicase DDX1	spliceosomal complex assembly;double-strand break repair;transcription, DNA-templated;regulation of transcription, DNA-templated;tRNA splicing, via endonucleolytic cleavage and ligation;regulation of translational initiation;multicellular organismal development;response to virus;RNA secondary structure unwinding;DNA duplex unwinding;response to exogenous dsRNA;nucleic acid phosphodiester bond hyd…	nucleus;nucleoplasm;cytoplasm;cytoplasmic stress granule;membrane;ribonucleoprotein complex;cleavage body;tRNA-splicing ligase complex;	3.2	3.356	3.214	3.439	2.85	2.982	3.531	3.456	-0.799	-0.728	-1.171	-0.979
A0A087X0P0	CENPE	Centromere-associated protein E	microtubule-based movement;metabolic process;	kinesin complex;microtubule;	3.755	3.945	3.451	3.661	2.669	2.827	3.744	3.379	-0.781	-0.74	-0.764	-0.504
Q99700	ATXN2	Ataxin-2	negative regulation of receptor internalization;regulation of translation;regulation of cytoplasmic mRNA processing body assembly;RNA metabolic process;cerebellar Purkinje cell differentiation;cytoplasmic mRNA processing body assembly;stress granule assembly;negative regulation of multicellular organism growth;neuron projection morphogenesis;homeostasis of number of cells;RNA transport;neuromuscu…	nucleoplasm;cytoplasm;Golgi apparatus;trans-Golgi network;polysome;cytoplasmic stress granule;membrane;ribonucleoprotein complex;perinuclear region of cytoplasm;	4.077	4.105	3.456	3.568	2.975	3.082	3.598	3.549	-0.589	-0.453	-0.604	-0.626
Q9Y2X3	NOP58	Nucleolar protein 58	rRNA modification;rRNA processing;snRNP protein import into nucleus;cell growth;	nucleus;nucleolus;small nucleolar ribonucleoprotein complex;cytoplasm;Cajal body;membrane;box C/D snoRNP complex;small-subunit processome;pre-snoRNP complex;	2.744	2.928	3.606	3.803	2.532	2.633	2.902	2.737	-0.24	-0.202	-0.838	-0.616
P14618	PKM	Pyruvate kinase PKM	response to hypoxia;liver development;carbohydrate metabolic process;glucose metabolic process;ATP biosynthetic process;response to nutrient;response to gravity;programmed cell death;response to muscle inactivity;phosphorylation;organ regeneration;response to insulin;pyruvate biosynthetic process;skeletal muscle tissue regeneration;small molecule metabolic process;canonical glycolysis;	nucleus;cytoplasm;mitochondrion;cytosol;plasma membrane;cilium;extracellular matrix;vesicle;myelin sheath;extracellular exosome;extracellular vesicle;	2.542	2.869	2.724	2.976	2.483	2.511	3.047	2.992	-0.216	-0.196	-0.499	-0.231
P22102	GART	Trifunctional purine biosynthetic protein adenosine-3	brainstem development;purine nucleobase metabolic process;'de novo' IMP biosynthetic process;glycine metabolic process;purine nucleobase biosynthetic process;purine ribonucleoside monophosphate biosynthetic process;response to organic substance;response to inorganic substance;cerebellum development;cerebral cortex development;methylation;small molecule metabolic process;tetrahydrofolate biosynthe…	cytosol;extracellular exosome;	3.089	3.188	2.801	2.921	2.39	2.496	3.263	3.093	-0.473	-0.418	-0.554	-0.471
Q13823	GNL2	Nucleolar GTP-binding protein 2	ribosome biogenesis;	nucleus;nucleolus;membrane;	0.565	0.651	3.385	3.515	0.906	0.91	1.022	0.895	-0.063	-0.029	-0.61	-0.524
Q8NCM8	DYNC2H1	Cytoplasmic dynein 2 heavy chain 1	organelle organization;Golgi organization;determination of left/right symmetry;asymmetric protein localization;dorsal/ventral pattern formation;protein processing;antigen processing and presentation of exogenous peptide antigen via MHC class II;spinal cord motor neuron differentiation;embryonic limb morphogenesis;forebrain development;intraciliary retrograde transport;cilium assembly;positive reg…	Golgi apparatus;cytosol;microtubule;plasma membrane;axoneme;dynein complex;motile primary cilium;apical part of cell;extracellular exosome;primary cilium;ciliary tip;	3.1	3.397	3.097	3.328	2.575	2.627	3.37	3.257	-0.664	-0.59	-0.517	-0.314
Q99848	EBNA1BP2	Probable rRNA-processing protein EBP2	ribosome biogenesis;	nucleus;nucleolus;membrane;	-0.169	-0.206	3.891	3.882	0.17	0.05	0.237	0.163	0.251	0.187	-0.474	-0.477
P35221	CTNNA1	Catenin alpha-1	ovarian follicle development;actin filament organization;cell adhesion;establishment or maintenance of cell polarity;small GTPase mediated signal transduction;negative regulation of neuroblast proliferation;aging;male gonad development;gap junction assembly;axon regeneration;cell junction assembly;adherens junction organization;cellular protein localization;odontogenesis of dentin-containing toot…	acrosomal vesicle;cytosol;plasma membrane;cell-cell junction;zonula adherens;focal adhesion;intercalated disc;actin cytoskeleton;catenin complex;lamellipodium;	3.233	3.342	3.174	3.322	2.934	3.01	3.873	3.855	-1.502	-1.375	-2.025	-1.882
P22314	UBA1	Ubiquitin-like modifier-activating enzyme 1	cellular response to DNA damage stimulus;protein ubiquitination;modification-dependent protein catabolic process;	nucleus;cytoplasm;mitochondrion;cytosol;extracellular exosome;heterochromatin;lysosomal membrane;endosome membrane;desmosome;rough endoplasmic reticulum membrane;	3.01	3.192	3.126	3.283	2.574	2.699	3.34	3.23	-0.536	-0.484	-0.898	-0.649
P52732	KIF11	Kinesin-like protein KIF11	microtubule-based movement;spindle organization;mitotic spindle organization;chromosome segregation;mitotic nuclear division;mitotic centrosome separation;blood coagulation;metabolic process;antigen processing and presentation of exogenous peptide antigen via MHC class II;regulation of mitotic centrosome separation;cell division;mitotic spindle assembly;	cytoplasm;spindle;cytosol;kinesin complex;microtubule;membrane;spindle pole;spindle microtubule;	3.73	3.895	3.419	3.633	2.953	3.02	3.86	3.752	-1.067	-1.04	-1.293	-1.047
Q8TEQ6	GEMIN5	Gem-associated protein 5	spliceosomal snRNP assembly;mRNA splicing, via spliceosome;protein complex assembly;gene expression;ncRNA metabolic process;	nucleus;nucleoplasm;cytoplasm;cytosol;membrane;nuclear body;SMN complex;SMN-Sm protein complex;Gemini of coiled bodies;	3.467	3.679	3.492	3.656	2.736	2.826	3.441	3.322	-0.743	-0.656	-0.874	-0.683
P60709	ACTB	Actin, cytoplasmic 1	retina homeostasis;chromatin organization;protein folding;movement of cell or subcellular component;small GTPase mediated signal transduction;axon guidance;blood coagulation;substantia nigra development;cell junction assembly;adherens junction organization;Fc-gamma receptor signaling pathway involved in phagocytosis;ATP-dependent chromatin remodeling;cellular protein metabolic process;innate immu…	nuclear chromatin;extracellular space;nucleoplasm;cytoplasm;cytosol;cytoskeleton;plasma membrane;focal adhesion;membrane;ribonucleoprotein complex;cortical cytoskeleton;NuA4 histone acetyltransferase complex;cytoplasmic ribonucleoprotein granule;myelin sheath;protein complex;extracellular exosome;MLL5-L complex;blood microparticle;dense body;	2.766	2.959	2.632	2.789	2.492	2.603	3.515	3.337	-0.713	-0.661	-0.822	-0.687
P78371	CCT2	T-complex protein 1 subunit beta	protein folding;binding of sperm to zona pellucida;cellular protein metabolic process;'de novo' posttranslational protein folding;chaperone-mediated protein complex assembly;toxin transport;	zona pellucida receptor complex;cytoplasm;cytosol;chaperonin-containing T-complex;microtubule;myelin sheath;cell body;extracellular exosome;	3.001	3.232	3.042	3.293	2.716	2.792	3.361	3.211	-0.443	-0.382	-0.827	-0.569
P05023	ATP1A1	Sodium/potassium-transporting ATPase subunit alpha-1	regulation of the force of heart contraction;regulation of sodium ion transport;cellular sodium ion homeostasis;regulation of blood pressure;potassium ion import;dephosphorylation;cellular potassium ion homeostasis;negative regulation of glucocorticoid biosynthetic process;ion transmembrane transport;sodium ion export from cell;response to drug;negative regulation of heart contraction;positive re…	endosome;endoplasmic reticulum;Golgi apparatus;plasma membrane;sodium:potassium-exchanging ATPase complex;caveola;intercalated disc;membrane;integral component of membrane;basolateral plasma membrane;apical plasma membrane;T-tubule;sarcolemma;melanosome;myelin sheath;protein complex;extracellular exosome;neuronal postsynaptic density;extracellular vesicle;	2.999	3.175	2.933	3.125	2.536	2.606	3.366	3.203	-0.659	-0.572	-0.554	-0.448
P50990	CCT8	T-complex protein 1 subunit theta	protein folding;binding of sperm to zona pellucida;cellular protein metabolic process;pore complex assembly;'de novo' posttranslational protein folding;toxin transport;	zona pellucida receptor complex;cytoplasm;centrosome;cytosol;chaperonin-containing T-complex;microtubule;aggresome;cell body;intermediate filament cytoskeleton;extracellular exosome;	2.898	3.084	2.998	3.169	2.676	2.765	3.248	3.144	-0.484	-0.444	-0.875	-0.641
Q14966	ZNF638	Zinc finger protein 638	transcription, DNA-templated;regulation of transcription, DNA-templated;RNA splicing;	nucleoplasm;cytoplasm;nuclear speck;intracellular membrane-bounded organelle;	3.24	3.357	3.469	3.729	2.834	2.891	3.335	3.149	-0.357	-0.277	-0.705	-0.596
Q6Y7W6	GIGYF2	GRB10-interacting GYF protein 2	feeding behavior;adult locomotory behavior;post-embryonic development;negative regulation of translation;spinal cord motor neuron differentiation;mitotic G1 DNA damage checkpoint;multicellular organism growth;cellular protein metabolic process;insulin-like growth factor receptor signaling pathway;homeostasis of number of cells within a tissue;musculoskeletal movement;neuromuscular process control…	cytoplasm;membrane;	3.37	3.446	3.274	3.306	2.652	2.725	3.499	3.294	-0.896	-0.826	-1.152	-0.989
P07437	TUBB	Tubulin beta chain	G2/M transition of mitotic cell cycle;mitotic cell cycle;movement of cell or subcellular component;organelle organization;microtubule-based process;metabolic process;cellular process;cytoskeleton-dependent intracellular transport;natural killer cell mediated cytotoxicity;spindle assembly;protein polymerization;cell division;	nucleus;nuclear envelope lumen;cytosol;cytoskeleton;microtubule;cytoplasmic ribonucleoprotein granule;cell body;extracellular exosome;	2.715	3.069	2.51	2.82	2.531	2.644	3.417	3.355	-0.97	-0.923	-1.44	-1.133
Q9Y6Y8	SEC23IP	SEC23-interacting protein	acrosome assembly;intracellular protein transport;Golgi organization;single fertilization;	cytoplasm;endoplasmic reticulum-Golgi intermediate compartment;cis-Golgi network;ER to Golgi transport vesicle membrane;intracellular membrane-bounded organelle;endoplasmic reticulum exit site;perinuclear endoplasmic reticulum;	3.673	3.942	2.9	3.08	2.98	3.071	3.489	3.428	-0.556	-0.462	-0.656	-0.524
P05455	SSB	Lupus La protein	tRNA modification;histone mRNA metabolic process;	nucleus;ribonucleoprotein complex;	2.386	2.607	4.371	4.485	2.629	2.656	2.678	2.578	0.011	0.052	-0.732	-0.531
P55265	ADAR	Double-stranded RNA-specific adenosine deaminase	osteoblast differentiation;in utero embryonic development;hematopoietic progenitor cell differentiation;somatic diversification of immune receptors via somatic mutation;adenosine to inosine editing;mRNA processing;protein import into nucleus;protein export from nucleus;response to virus;gene expression;base conversion or substitution editing;mRNA modification;cytokine-mediated signaling pathway;e…	nucleus;nucleoplasm;nucleolus;cytoplasm;membrane;supraspliceosomal complex;	3.114	3.266	3.42	3.44	2.574	2.699	3.249	3.096	-0.423	-0.395	-0.816	-0.623
O14578-4	CIT	Isoform 4 of Citron Rho-interacting kinase	mitotic sister chromatid segregation;cytokinesis;protein phosphorylation;mitotic nuclear division;metaphase/anaphase transition of mitotic cell cycle;small GTPase mediated signal transduction;spermatogenesis;dendrite development;positive regulation of cytokinesis;generation of neurons;negative regulation of dendrite morphogenesis;	ruffle;vacuole;cytosol;actin cytoskeleton;membrane;	3.423	3.566	3.441	3.621	2.679	2.732	3.414	3.265	-0.717	-0.626	-0.797	-0.526
Q6ZU80	CEP128	Centrosomal protein of 128 kDa		spindle pole;cytoplasm;centriole;microtubule organizing center;	3.709	3.49	3.166	3.142	2.931	3.03	3.304	3.163	-0.223	-0.17	-0.71	-0.671
Q92667	AKAP1	A-kinase anchor protein 1, mitochondrial	blood coagulation;negative regulation of cardiac muscle hypertrophy;negative regulation of protein dephosphorylation;negative regulation of NFAT protein import into nucleus;cellular response to cAMP;cellular response to peptide hormone stimulus;	mitochondrion;mitochondrial outer membrane;mitochondrial matrix;lipid particle;cytosol;membrane;integral component of membrane;mitochondrial crista;neuromuscular junction;postsynaptic membrane;	4.722	4.8	3.597	3.708	3.323	3.419	2.96	2.769	1.169	1.222	1.03	1.125
Q9UPQ9-1	TNRC6B	Isoform 2 of Trinucleotide repeat-containing gene 6B protein	regulation of translation;epidermal growth factor receptor signaling pathway;Notch signaling pathway;fibroblast growth factor receptor signaling pathway;gene expression;posttranscriptional gene silencing;gene silencing by RNA;Fc-epsilon receptor signaling pathway;innate immune response;neurotrophin TRK receptor signaling pathway;phosphatidylinositol-mediated signaling;positive regulation of nucle…	cytoplasmic mRNA processing body;cytosol;	3.895	3.912	3.517	3.45	2.911	2.943	3.525	3.307	-0.559	-0.408	-0.485	-0.498
Q15393	SF3B3	Splicing factor 3B subunit 3	RNA splicing, via transesterification reactions;mRNA splicing, via spliceosome;mRNA processing;protein complex assembly;RNA splicing;gene expression;negative regulation of protein catabolic process;	nucleoplasm;spliceosomal complex;U12-type spliceosomal complex;small nuclear ribonucleoprotein complex;catalytic step 2 spliceosome;	3.037	3.17	3.088	3.278	2.518	2.613	3.215	3.16	-0.276	-0.213	-0.192	0.045
Q9NVP1	DDX18	ATP-dependent RNA helicase DDX18	RNA secondary structure unwinding;	nucleolus;membrane;	2.544	2.727	4.135	4.32	2.439	2.491	2.763	2.716	-0.276	-0.209	-0.892	-0.619
P38646	HSPA9	Stress-70 protein, mitochondrial	protein folding;protein export from nucleus;protein targeting to mitochondrion;response to toxic substance;negative regulation of apoptotic process;cellular protein metabolic process;cellular response to interleukin-1;	nucleolus;cytoplasm;mitochondrion;focal adhesion;mitochondrial nucleoid;myelin sheath;extracellular exosome;	2.633	2.763	2.253	2.479	2.434	2.474	2.74	2.619	-0.001	-0.027	-0.474	-0.241
B4DXZ6	FXR1	Fragile X mental retardation syndrome-related protein 1	negative regulation of translation;	nucleus;cytoplasm;	3.619	3.733	3.477	3.539	2.838	2.967	3.736	3.649	-1.034	-0.931	-1.352	-1.132
P02751	FN1	Fibronectin	angiogenesis;regulation of protein phosphorylation;platelet degranulation;acute-phase response;cell-substrate junction assembly;cell adhesion;calcium-independent cell-matrix adhesion;blood coagulation;positive regulation of cell proliferation;regulation of cell shape;response to wounding;positive regulation of gene expression;positive regulation of peptidase activity;peptide cross-linking;extrace…	extracellular region;fibrinogen complex;basal lamina;extracellular space;endoplasmic reticulum-Golgi intermediate compartment;apical plasma membrane;extracellular matrix;platelet alpha granule lumen;extracellular exosome;blood microparticle;extracellular matrix;	2.429	2.583	1.014	1.118	1.702	1.782	3.559	3.385	-1.477	-1.28	-1.531	-1.412
Q86V48	LUZP1	Leucine zipper protein 1	ventricular septum development;neural fold bending;artery development;	nucleus;membrane;extracellular exosome;	3.357	3.336	2.962	2.987	2.607	2.733	3.531	3.141	-0.475	-0.321	-1.032	-1.131
P55072	VCP	Transitional endoplasmic reticulum ATPase	DNA repair;double-strand break repair;ER to Golgi vesicle-mediated transport;activation of cysteine-type endopeptidase activity involved in apoptotic process;cellular response to DNA damage stimulus;protein ubiquitination;protein N-linked glycosylation via asparagine;viral genome replication;translesion synthesis;ER-associated ubiquitin-dependent protein catabolic process;endoplasmic reticulum un…	proteasome complex;Hrd1p ubiquitin ligase complex;nucleus;nucleoplasm;cytoplasm;endoplasmic reticulum;endoplasmic reticulum membrane;lipid particle;cytosol;VCP-NPL4-UFD1 AAA ATPase complex;site of double-strand break;myelin sheath;intracellular membrane-bounded organelle;perinuclear region of cytoplasm;extracellular exosome;VCP-NSFL1C complex;	3.678	3.86	3.071	3.241	3.133	3.185	3.542	3.445	-0.524	-0.516	-0.946	-0.665
P14866	HNRNPL	Heterogeneous nuclear ribonucleoprotein L	mRNA splicing, via spliceosome;RNA processing;RNA splicing;gene expression;	nucleus;nucleoplasm;cytoplasm;membrane;ribonucleoprotein complex;pronucleus;extracellular exosome;	2.349	2.404	3.735	3.765	2.35	2.409	2.486	2.406	-0.042	0.009	-0.639	-0.617
Q8IZH2	XRN1	5'-3' exoribonuclease 1	nuclear-transcribed mRNA catabolic process, deadenylation-dependent decay;nuclear-transcribed mRNA catabolic process;gene expression;rRNA catabolic process;exonucleolytic nuclear-transcribed mRNA catabolic process involved in deadenylation-dependent decay;nuclear mRNA surveillance;histone mRNA catabolic process;nucleic acid phosphodiester bond hydrolysis;	cytoplasmic mRNA processing body;nucleus;cytoplasm;Golgi apparatus;cytosol;plasma membrane;membrane;intermediate filament cytoskeleton;	3.409	3.656	3.636	3.779	2.79	2.887	3.462	3.376	-0.519	-0.453	-0.84	-0.562
Q92621	NUP205	Nuclear pore complex protein Nup205	protein import into nucleus, docking;mitotic cell cycle;carbohydrate metabolic process;nucleocytoplasmic transport;mitotic nuclear envelope disassembly;hexose transport;gene expression;regulation of glucose transport;glucose transport;viral process;protein sumoylation;viral life cycle;viral transcription;cytokine-mediated signaling pathway;cellular response to heat;post-translational protein modi…	nuclear envelope;nuclear pore;nucleoplasm;cytoplasm;membrane;nuclear membrane;nuclear periphery;	3.506	3.466	3.009	3.146	2.629	2.712	3.468	3.347	-0.64	-0.516	-0.59	-0.348
Q5UIP0	RIF1	Telomere-associated protein RIF1	telomere maintenance;cellular response to DNA damage stimulus;cell cycle;stem cell maintenance;positive regulation of double-strand break repair via nonhomologous end joining;	chromosome, telomeric region;female pronucleus;male pronucleus;nucleus;cytoplasm;spindle;plasma membrane;	3.259	3.474	3.451	3.821	2.728	2.866	3.444	3.302	-0.646	-0.601	-0.961	-0.626
P50851-2	LRBA	Isoform 2 of Lipopolysaccharide-responsive and beige-like anchor protein	endosomal transport;	lysosome;endoplasmic reticulum;Golgi apparatus;plasma membrane;endomembrane system;membrane;integral component of membrane;cytoplasmic membrane-bounded vesicle;extrinsic component of membrane;	3.308	3.442	2.435	2.562	2.597	2.678	3.271	3.189	-0.495	-0.404	-0.265	-0.096
O94901-9	SUN1	Isoform 9 of SUN domain-containing protein 1	nuclear envelope organization;synapsis;cytoskeletal anchoring at nuclear membrane;nuclear matrix anchoring at nuclear membrane;	acrosomal membrane;nuclear envelope;integral component of nuclear inner membrane;nuclear membrane;LINC complex;intracellular membrane-bounded organelle;	3.286	3.348	3.395	3.474	2.54	2.651	3.241	2.979	-0.297	-0.204	-0.568	-0.321
Q9Y4C8	RBM19	Probable RNA-binding protein 19	multicellular organismal development;positive regulation of embryonic development;	nucleus;nucleoplasm;chromosome;nucleolus;cytoplasm;membrane;	2.828	3.065	3.743	3.943	2.517	2.602	2.951	2.771	-0.166	-0.127	-0.783	-0.654
Q14151	SAFB2	Scaffold attachment factor B2	transcription, DNA-templated;regulation of transcription, DNA-templated;	nucleoplasm;cytoplasm;intracellular membrane-bounded organelle;extracellular exosome;	2.849	2.797	2.66	2.469	2.06	2.125	2.688	2.33	-0.076	0.089	-0.42	-0.653
Q5T6F2	UBAP2	Ubiquitin-associated protein 2			3.959	4.11	3.505	3.707	3.067	3.256	3.603	3.528	-0.621	-0.491	-0.755	-0.613
Q8IUD2	ERC1	ELKS/Rab6-interacting/CAST family member 1	regulation of transcription, DNA-templated;I-kappaB phosphorylation;multicellular organismal development;protein transport;retrograde transport, endosome to Golgi;positive regulation of NF-kappaB transcription factor activity;	Golgi membrane;cytoplasm;IkappaB kinase complex;presynaptic membrane;synapse;presynaptic active zone;	3.501	3.772	3.304	3.58	2.938	2.988	3.709	3.624	-1.04	-1.017	-1.578	-1.375
P14923	JUP	Junction plakoglobin	desmosome assembly;cytoskeletal anchoring at plasma membrane;single organismal cell-cell adhesion;cell migration;cell junction assembly;adherens junction organization;adherens junction assembly;regulation of cell proliferation;positive regulation of protein import into nucleus;regulation of cell fate specification;skin development;cell-cell junction organization;vascular endothelial growth factor…	nucleus;cytoplasm;cytosol;cytoskeleton;intermediate filament;plasma membrane;cell-cell junction;cell-cell adherens junction;zonula adherens;focal adhesion;cytoplasmic side of plasma membrane;intercalated disc;catenin complex;Z disc;desmosome;protein-DNA complex;extracellular exosome;gamma-catenin-TCF7L2 complex;hemidesmosome;	2.742	2.913	2.266	2.501	2.24	2.243	3.425	3.35	-1.214	-1.148	-1.404	-1.257
Q9H6S0	YTHDC2	Probable ATP-dependent RNA helicase YTHDC2	RNA processing;response to tumor necrosis factor;positive regulation by host of viral genome replication;response to interleukin-1;	cytoplasm;endoplasmic reticulum;endoplasmic reticulum;	3.161	3.382	3.448	3.691	2.789	2.832	3.218	3.106	-0.456	-0.405	-0.821	-0.642
Q14684	RRP1B	Ribosomal RNA processing protein 1 homolog B	rRNA processing;negative regulation of phosphatase activity;	euchromatin;heterochromatin;nucleus;nucleolus;cytosol;preribosome, small subunit precursor;	2.518	2.549	3.927	3.956	2.49	2.604	2.762	2.599	-0.179	-0.121	-0.76	-0.702
Q86YZ3	HRNR	Hornerin	hematopoietic progenitor cell differentiation;keratinization;cell envelope organization;establishment of skin barrier;	cornified envelope;nucleus;cytoplasm;cell envelope;keratohyalin granule;perinuclear region of cytoplasm;extracellular exosome;	-0.919	-0.771	-1.741	-1.434	-0.597	-0.748	0.199	-0.31	0.586	0.451	0.509	0.782
Q96PK6	RBM14	RNA-binding protein 14	DNA replication;DNA repair;DNA recombination;transcription, DNA-templated;response to hormone;histone deacetylation;intracellular estrogen receptor signaling pathway;glucocorticoid receptor signaling pathway;positive regulation of transcription from RNA polymerase II promoter;negative regulation of centriole replication;	nucleoplasm;transcription factor complex;nucleolus;mediator complex;ribonucleoprotein complex;	2.831	2.82	2.844	2.892	2.435	2.466	2.73	2.466	0.055	0.099	-0.411	-0.43
P40939	HADHA	Trifunctional enzyme subunit alpha, mitochondrial	fatty acid beta-oxidation;phospholipid metabolic process;response to insulin;cardiolipin acyl-chain remodeling;response to drug;cellular lipid metabolic process;small molecule metabolic process;glycerophospholipid biosynthetic process;	mitochondrion;mitochondrial inner membrane;mitochondrial fatty acid beta-oxidation multienzyme complex;mitochondrial nucleoid;	2.942	3.162	3.064	3.303	2.632	2.739	3.087	2.992	-0.281	-0.167	-0.573	-0.351
Q02878	RPL6	60S ribosomal protein L6	ribosomal large subunit assembly;nuclear-transcribed mRNA catabolic process, nonsense-mediated decay;cytoplasmic translation;regulation of transcription, DNA-templated;translation;translational initiation;translational elongation;translational termination;SRP-dependent cotranslational protein targeting to membrane;gene expression;viral process;viral life cycle;viral transcription;cellular protein…	nucleus;cytosol;focal adhesion;membrane;cytosolic large ribosomal subunit;cytoplasmic ribonucleoprotein granule;	2.764	2.815	4.476	4.703	2.448	2.495	2.506	2.463	-0.074	-0.03	-0.25	-0.154
P78344	EIF4G2	Eukaryotic translation initiation factor 4 gamma 2	translational initiation;regulation of translational initiation;cell cycle arrest;cell death;cytokine-mediated signaling pathway;	cytosol;membrane;eukaryotic translation initiation factor 4F complex;	3.354	3.637	3.348	3.532	2.959	3.096	3.783	3.718	-1.19	-1.056	-1.564	-1.376
O95714	HERC2	E3 ubiquitin-protein ligase HERC2	DNA repair;intracellular protein transport;cellular response to DNA damage stimulus;spermatogenesis;protein ubiquitination;protein sumoylation;protein ubiquitination involved in ubiquitin-dependent protein catabolic process;positive regulation of GTPase activity;post-translational protein modification;cellular protein metabolic process;	nucleus;nucleoplasm;cytoplasm;mitochondrial inner membrane;centriole;membrane;	3.289	3.602	2.945	3.127	2.772	2.722	3.246	3.049	-0.426	-0.405	-0.364	-0.237
Q5VYK3	ECM29	Proteasome-associated protein ECM29 homolog	ER-associated ubiquitin-dependent protein catabolic process;	nucleus;early endosome;late endosome;multivesicular body;endoplasmic reticulum;endoplasmic reticulum-Golgi intermediate compartment;centrosome;membrane;cytoplasmic membrane-bounded vesicle;ER to Golgi transport vesicle;endocytic vesicle;trans-Golgi network;proteasome complex;	3.25	3.45	3.306	3.61	2.665	2.762	3.307	3.288	-0.736	-0.675	-0.946	-0.641
P55060	CSE1L	Exportin-2	protein export from nucleus;apoptotic process;cell proliferation;	nucleus;nucleoplasm;cytoplasm;membrane;extracellular exosome;	3.018	3.209	3.104	3.29	2.566	2.626	3.346	3.303	-0.863	-0.766	-1.024	-0.748
A0A087WYN9	DHX29	ATP-dependent RNA helicase DHX29	RNA processing;	cytoplasm;mitochondrion;	3.032	3.22	3.7	4.013	2.575	2.568	3.144	3.01	-0.499	-0.45	-0.892	-0.555
P11586	MTHFD1	C-1-tetrahydrofolate synthase, cytoplasmic	histidine biosynthetic process;neural tube closure;purine nucleotide biosynthetic process;methionine metabolic process;one-carbon metabolic process;vitamin metabolic process;water-soluble vitamin metabolic process;heart development;serine family amino acid metabolic process;serine family amino acid biosynthetic process;methionine biosynthetic process;10-formyltetrahydrofolate biosynthetic process…	mitochondrion;cytosol;membrane;extracellular exosome;	2.928	3.064	2.827	2.991	2.504	2.545	3.28	3.103	-0.535	-0.485	-0.761	-0.595
O95487	SEC24B	Protein transport protein Sec24B	neural tube closure;antigen processing and presentation of peptide antigen via MHC class I;outflow tract morphogenesis;intracellular protein transport;ER to Golgi vesicle-mediated transport;vesicle-mediated transport;protein N-linked glycosylation via asparagine;antigen processing and presentation of exogenous peptide antigen via MHC class II;cochlear nucleus development;aorta morphogenesis;post-…	Golgi membrane;endoplasmic reticulum membrane;cytosol;ER to Golgi transport vesicle membrane;membrane;COPII vesicle coat;perinuclear region of cytoplasm;	3.965	4.235	2.594	2.851	2.783	2.836	3.361	3.31	-0.59	-0.505	-0.562	-0.206
P35659	DEK	Protein DEK	regulation of transcription from RNA polymerase II promoter;transcription from RNA polymerase II promoter;signal transduction;chromatin modification;viral genome replication;regulation of double-strand break repair;regulation of double-strand break repair via nonhomologous end joining;	nucleus;contractile fiber;	2.663	2.778	1.6	1.774	2.568	2.656	3.072	2.926	-0.29	-0.282	-0.793	-0.655
O15226	NKRF	NF-kappa-B-repressing factor	transcription, DNA-templated;negative regulation of transcription, DNA-templated;	nucleus;nucleolus;endoplasmic reticulum;	2.917	3.028	3.873	3.86	2.614	2.709	2.992	2.81	-0.275	-0.184	-0.582	-0.544
P67809	YBX1	Nuclease-sensitive element-binding protein 1	negative regulation of transcription from RNA polymerase II promoter;mRNA splicing, via spliceosome;in utero embryonic development;regulation of transcription, DNA-templated;transcription from RNA polymerase II promoter;RNA splicing;gene expression;positive regulation of transcription from RNA polymerase II promoter;negative regulation of striated muscle cell differentiation;positive regulation o…	nucleus;nucleoplasm;U12-type spliceosomal complex;cytoplasm;cytoplasmic stress granule;ribonucleoprotein complex;nuclear membrane;intracellular membrane-bounded organelle;extracellular exosome;CRD-mediated mRNA stability complex;histone pre-mRNA 3'end processing complex;	3.645	3.49	2.741	2.742	3.026	3.243	3.731	3.608	-0.96	-0.755	-1.367	-1.496
O75400	PRPF40A	Pre-mRNA-processing factor 40 homolog A	mRNA processing;cytoskeleton organization;cell cycle;regulation of cell shape;RNA splicing;cell migration;regulation of cytokinesis;cell division;	nucleoplasm;cytoplasm;membrane;nuclear matrix;nuclear speck;	2.481	2.621	2.742	2.829	2.572	2.646	2.809	2.693	-0.011	0.022	-0.425	-0.255
Q08J23	NSUN2	tRNA (cytosine(34)-C(5))-methyltransferase	mitotic nuclear division;spermatid development;tRNA methylation;cell division;	nucleus;nucleolus;cytoplasm;spindle;chromatoid body;	2.717	3.001	3.417	3.679	2.559	2.644	3.011	2.872	-0.229	-0.156	-0.943	-0.607
P26358	DNMT1	DNA (cytosine-5)-methyltransferase 1	negative regulation of transcription from RNA polymerase II promoter;DNA methylation;transcription, DNA-templated;maintenance of DNA methylation;gene expression;positive regulation of gene expression;gene silencing;chromatin modification;DNA methylation on cytosine;regulation of gene expression, epigenetic;regulation of cell proliferation;negative regulation of gene expression, epigenetic;positiv…	nucleus;nucleoplasm;replication fork;pericentric heterochromatin;	2.917	3.096	3.299	3.508	2.58	2.655	3.021	2.711	-0.231	-0.145	-0.624	-0.469
Q9Y2L1	DIS3	Exosome complex exonuclease RRP44	nuclear-transcribed mRNA catabolic process, deadenylation-dependent decay;rRNA processing;mRNA catabolic process;gene expression;rRNA catabolic process;positive regulation of GTPase activity;exonucleolytic nuclear-transcribed mRNA catabolic process involved in deadenylation-dependent decay;CUT catabolic process;nucleic acid phosphodiester bond hydrolysis;RNA phosphodiester bond hydrolysis, exonuc…	nuclear exosome (RNase complex);cytoplasmic exosome (RNase complex);exosome (RNase complex);nucleoplasm;cytosol;membrane;nucleolus;	3.003	3.229	3.379	3.547	2.689	2.822	3.145	3.036	-0.38	-0.305	-0.734	-0.512
O60287	URB1	Nucleolar pre-ribosomal-associated protein 1		nucleolus;	2.905	3.096	3.519	3.861	2.468	2.486	2.953	2.864	-0.247	-0.229	-0.47	-0.233
E9PD53	SMC4	Structural maintenance of chromosomes protein	chromosome organization;	nucleoplasm;chromosome;cytoplasm;	2.926	3.14	3.283	3.501	2.584	2.683	3.26	3.108	-0.621	-0.56	-0.86	-0.651
O60832	DKC1	H/ACA ribonucleoprotein complex subunit 4	box H/ACA snoRNA 3'-end processing;telomere maintenance;rRNA processing;RNA processing;telomere maintenance via telomerase;cell proliferation;rRNA pseudouridine synthesis;snRNA pseudouridine synthesis;positive regulation of telomere maintenance via telomerase;positive regulation of telomerase activity;mRNA pseudouridine synthesis;	nucleus;nucleoplasm;telomerase holoenzyme complex;nucleolus;cytoplasm;Cajal body;box H/ACA snoRNP complex;	2.668	2.75	4.076	4.373	2.402	2.5	2.823	2.752	-0.191	-0.158	-0.583	-0.414
O75367	H2AFY	Core histone macro-H2A.1	negative regulation of transcription from RNA polymerase II promoter;nucleosome assembly;dosage compensation;chromatin modification;regulation of lipid metabolic process;negative regulation of histone phosphorylation;regulation of gene expression, epigenetic;positive regulation of keratinocyte differentiation;negative regulation of gene expression, epigenetic;positive regulation of gene expressio…	nuclear chromosome;nucleosome;nuclear chromatin;condensed chromosome;sex chromatin;Barr body;nucleus;nucleoplasm;pericentric heterochromatin;nucleolus;extracellular exosome;ESC/E(Z) complex;	1.821	2.052	4.215	4.39	2.1	2.145	2.255	2.158	-0.05	-0.001	-0.761	-0.573
Q8N7H5	PAF1	RNA polymerase II-associated factor 1 homolog	negative regulation of transcription from RNA polymerase II promoter;endodermal cell fate commitment;transcription elongation from RNA polymerase II promoter;mRNA polyadenylation;histone monoubiquitination;Wnt signaling pathway;nucleosome positioning;stem cell maintenance;positive regulation of histone methylation;positive regulation of mRNA 3'-end processing;positive regulation of transcription …	cytoplasm;membrane;Cdc73/Paf1 complex;	2.868	3.133	3.347	3.515	2.713	2.739	2.958	2.801	0.035	0.043	-0.466	-0.26
O76021	RSL1D1	Ribosomal L1 domain-containing protein 1	osteoblast differentiation;regulation of protein localization;regulation of apoptotic process;regulation of cellular senescence;	nucleolus;membrane;	2.536	2.689	3.994	4.241	2.525	2.574	2.671	2.581	-0.117	-0.116	-0.882	-0.665
F2Z2U4	TRRAP	Transformation/transcription domain-associated protein	DNA repair;phosphorylation;	nucleoplasm;Golgi apparatus;	2.983	2.925	3.197	3.155	2.433	2.541	2.898	2.58	-0.187	-0.123	-0.24	0.008
P49790	NUP153	Nuclear pore complex protein Nup153	mitotic cell cycle;carbohydrate metabolic process;mitotic nuclear envelope disassembly;hexose transport;gene expression;regulation of glucose transport;protein transport;glucose transport;viral process;protein sumoylation;viral life cycle;viral transcription;cytokine-mediated signaling pathway;cellular response to heat;post-translational protein modification;cellular protein metabolic process;sma…	nuclear pore;nuclear lamina;nucleoplasm;nucleolus;cytoplasm;nuclear membrane;nuclear periphery;nuclear inclusion body;nuclear pore nuclear basket;	3.752	3.937	3.404	3.533	2.939	3.029	3.689	3.516	-0.621	-0.513	-0.751	-0.69
Q15021	NCAPD2	Condensin complex subunit 1	mitotic cell cycle;mitotic chromosome condensation;meiotic chromosome condensation;cell division;chromosome separation;	condensed chromosome, centromeric region;condensed chromosome;condensin complex;condensin core heterodimer;nuclear condensin complex;nucleus;nucleoplasm;cytoplasm;cytosol;membrane;nuclear chromosome;cytoplasm;	3.287	3.561	3.706	3.945	2.839	3	3.476	3.438	-0.681	-0.608	-0.969	-0.7
Q5SSJ5	HP1BP3	Heterochromatin protein 1-binding protein 3	nucleosome assembly;regulation of transcription, DNA-templated;regulation of cell proliferation;heterochromatin organization;cellular response to hypoxia;regulation of nucleus size;	nucleosome;nucleus;chromosome;	1.621	1.82	3.813	3.971	1.822	1.815	1.636	1.578	-0.024	0.006	-0.736	-0.601
Q13439	GOLGA4	Golgin subfamily A member 4	protein targeting to Golgi;vesicle-mediated transport;Golgi to plasma membrane protein transport;positive regulation of axon extension;	Golgi membrane;nucleoplasm;cytoplasm;Golgi apparatus;trans-Golgi network;intracellular membrane-bounded organelle;extracellular exosome;	3.334	3.56	3.18	3.42	2.907	2.931	3.761	3.592	-0.993	-0.933	-1.478	-1.241
P52597	HNRNPF	Heterogeneous nuclear ribonucleoprotein F	mRNA splicing, via spliceosome;RNA processing;RNA splicing;gene expression;regulation of RNA splicing;	nucleus;nucleoplasm;membrane;catalytic step 2 spliceosome;	3.056	3.239	3.494	3.682	2.807	2.883	3.124	3.045	-0.22	-0.177	-0.93	-0.729
Q71RC2	LARP4	La-related protein 4	cytoskeleton organization;regulation of cell morphogenesis;	membrane;	4.817	4.771	3.748	3.712	3.073	3.241	3.433	3.303	-0.167	-0.036	-0.423	-0.077
Q13523	PRPF4B	Serine/threonine-protein kinase PRP4 homolog	mRNA splicing, via spliceosome;protein phosphorylation;RNA splicing;	nucleoplasm;chromosome;catalytic step 2 spliceosome;	2.555	2.906	0.989	1.238	2.595	2.681	2.866	2.753	-0.087	-0.049	-0.55	-0.296
Q5QJE6	DNTTIP2	Deoxynucleotidyltransferase terminal-interacting protein 2	transcription, DNA-templated;regulation of transcription, DNA-templated;	nucleus;nucleolus;	2.613	2.824	3.814	3.953	2.496	2.528	2.917	2.746	-0.249	-0.155	-0.94	-0.808
P13797	PLS3	Plastin-3	bone development;	cytoplasm;	3.306	3.47	3.158	3.247	2.765	2.834	3.705	3.543	-1.055	-1.007	-1.436	-1.251
P49411	TUFM	Elongation factor Tu, mitochondrial	translational elongation;organelle organization;mitochondrial translation;mitochondrial translational elongation;	mitochondrion;membrane;mitochondrial nucleoid;extracellular exosome;	2.584	2.82	2.664	2.84	2.497	2.548	2.738	2.593	-0.119	-0.065	-0.738	-0.444
Q7Z417	NUFIP2	Nuclear fragile X mental retardation-interacting protein 2		nucleus;cytoplasm;membrane;polysomal ribosome;	3.98	4.073	3.664	3.845	3.177	3.218	3.921	3.854	-0.987	-0.944	-1.309	-1.177
Q01804	OTUD4	OTU domain-containing protein 4	protein K48-linked deubiquitination;		3.673	3.804	3.35	3.479	2.777	2.78	3.548	3.368	-0.557	-0.464	-0.689	-0.581
Q96KR1	ZFR	Zinc finger RNA-binding protein	multicellular organismal development;	nucleoplasm;chromosome;cytoplasm;	2.926	3.032	3.649	3.85	2.529	2.6	2.966	2.637	-0.31	-0.208	-0.649	-0.618
Q14444	CAPRIN1	Caprin-1	negative regulation of translation;positive regulation of dendrite morphogenesis;positive regulation of dendritic spine morphogenesis;	cytoplasmic mRNA processing body;cytoplasm;cytosol;integral component of plasma membrane;cytoplasmic stress granule;membrane;dendrite;	4.338	4.48	3.732	3.928	3.457	3.545	4.104	4.081	-1.176	-1.145	-1.689	-1.476
Q6P158	DHX57	Putative ATP-dependent RNA helicase DHX57	RNA processing;	cytoplasm;mitochondrion;	3.339	3.483	3.902	4.177	2.706	2.802	3.217	3.045	-0.444	-0.373	-0.77	-0.596
P23396	RPS3	40S ribosomal protein S3	nuclear-transcribed mRNA catabolic process, nonsense-mediated decay;DNA repair;transcription, DNA-templated;translation;translational initiation;translational elongation;translational termination;regulation of translation;SRP-dependent cotranslational protein targeting to membrane;apoptotic process;cellular response to DNA damage stimulus;mitotic nuclear division;gene expression;viral process;vir…	nucleus;nucleolus;cytoplasm;mitochondrial inner membrane;spindle;cytosol;focal adhesion;membrane;cytosolic small ribosomal subunit;ribonucleoprotein complex;ruffle membrane;extracellular exosome;NF-kappaB complex;	3.031	3.254	4.533	4.791	2.353	2.494	2.813	2.692	-0.708	-0.62	-0.14	0.078
Q9UHI6	DDX20	Probable ATP-dependent RNA helicase DDX20	negative regulation of transcription from RNA polymerase II promoter;spliceosomal tri-snRNP complex assembly;spliceosomal snRNP assembly;RNA processing;gene expression;RNA secondary structure unwinding;ncRNA metabolic process;positive regulation of apoptotic process;oogenesis;regulation of steroid biosynthetic process;	nucleus;nucleoplasm;cytoplasm;cytosol;cytoskeleton;membrane;transcriptional repressor complex;SMN complex;SMN-Sm protein complex;Gemini of coiled bodies;	4.013	4.274	3.865	4.015	2.846	2.989	3.649	3.577	-0.835	-0.796	-0.757	-0.553
Q12789	GTF3C1	General transcription factor 3C polypeptide 1	transcription, DNA-templated;transcription from RNA polymerase III promoter;rRNA transcription;tRNA transcription;gene expression;5S class rRNA transcription from RNA polymerase III type 1 promoter;tRNA transcription from RNA polymerase III promoter;	transcription factor TFIIIC complex;nucleus;nucleoplasm;nucleolus;membrane;ribonucleoprotein complex;	3.168	3.186	3.421	3.499	2.5	2.578	3.167	2.989	-0.349	-0.224	-0.502	-0.335
Q14974	KPNB1	Importin subunit beta-1	protein import into nucleus, translocation;apoptotic DNA fragmentation;protein import into nucleus;NLS-bearing protein import into nucleus;ribosomal protein import into nucleus;apoptotic process;cellular component disassembly involved in execution phase of apoptosis;programmed cell death;viral process;viral life cycle;cytokine-mediated signaling pathway;small molecule metabolic process;intracellu…	nuclear envelope;nuclear pore;nucleoplasm;cytoplasm;cytosol;membrane;nuclear membrane;extracellular exosome;endoplasmic reticulum tubular network;	3.499	3.795	3.504	3.784	3.127	3.207	3.763	3.71	-0.925	-0.837	-1.385	-0.989
M0R2Z9	SUGP2	SURP and G-patch domain-containing protein 2	RNA processing;	nucleoplasm;	2.962	3.214	3.547	3.723	2.697	2.764	3.207	3.12	-0.425	-0.345	-0.942	-0.775
Q9UIQ6	LNPEP	Leucyl-cystinyl aminopeptidase	protein polyubiquitination;antigen processing and presentation of peptide antigen via MHC class I;antigen processing and presentation of exogenous peptide antigen via MHC class I, TAP-independent;proteolysis;signal transduction;cell-cell signaling;female pregnancy;regulation of blood pressure;protein catabolic process;antigen processing and presentation of exogenous peptide antigen via MHC class …	extracellular region;intracellular;lysosomal membrane;cytosol;plasma membrane;integral component of plasma membrane;membrane;cytoplasmic vesicle membrane;early endosome lumen;perinuclear region of cytoplasm;	2.998	3.19	2.524	2.744	2.949	3.001	3.084	3.064	-0.195	-0.125	-0.453	-0.251
P18124	RPL7	60S ribosomal protein L7	nuclear-transcribed mRNA catabolic process, nonsense-mediated decay;maturation of LSU-rRNA from tricistronic rRNA transcript (SSU-rRNA, 5.8S rRNA, LSU-rRNA);cytoplasmic translation;rRNA processing;translation;translational initiation;translational elongation;translational termination;SRP-dependent cotranslational protein targeting to membrane;gene expression;viral process;viral life cycle;viral t…	nucleus;nucleolus;cytoplasm;cytosol;polysome;focal adhesion;membrane;cytosolic large ribosomal subunit;ribonucleoprotein complex;extracellular exosome;	2.934	3.137	4.551	4.669	2.655	2.71	2.938	2.872	-0.264	-0.202	-0.515	-0.301
Q14126	DSG2	Desmoglein-2	desmosome organization;Purkinje myocyte development;apoptotic process;cellular component disassembly involved in execution phase of apoptosis;cell adhesion;homophilic cell adhesion via plasma membrane adhesion molecules;programmed cell death;response to progesterone;maternal process involved in female pregnancy;bundle of His cell-Purkinje myocyte adhesion involved in cell communication;regulation…	plasma membrane;cell-cell junction;cell surface;intercalated disc;integral component of membrane;apical plasma membrane;lateral plasma membrane;desmosome;extracellular exosome;	2.713	2.974	2.548	2.908	2.494	2.539	3.372	3.26	-1.148	-1.027	-1.513	-1.375
Q15397	PUM3	Pumilio homolog 3	regulation of translation;	nucleolus;endoplasmic reticulum;	2.664	2.82	3.949	4.239	2.617	2.669	2.855	2.753	-0.278	-0.202	-1.028	-0.755
P42696	RBM34	RNA-binding protein 34		nucleus;nucleolus;	2.198	2.409	3.806	3.914	2.177	2.237	2.338	2.102	-0.014	-0.027	-0.739	-0.574
Q9UDY2	TJP2	Tight junction protein ZO-2	apoptotic process;cellular component disassembly involved in execution phase of apoptosis;response to organic substance;programmed cell death;hippo signaling;nucleotide phosphorylation;intestinal absorption;establishment of endothelial intestinal barrier;regulation of membrane permeability;	nucleoplasm;cytoplasm;cytosol;plasma membrane;adherens junction;bicellular tight junction;cell junction;	3.343	3.446	2.575	2.591	2.608	2.757	3.755	3.544	-1.32	-1.207	-1.633	-1.539
Q96T58	SPEN	Msx2-interacting protein	negative regulation of transcription from RNA polymerase II promoter;transcription, DNA-templated;Notch signaling pathway;viral process;negative regulation of transcription, DNA-templated;positive regulation of transcription, DNA-templated;positive regulation of neurogenesis;	nucleoplasm;transcriptional repressor complex;extracellular exosome;	2.858	2.847	3.287	3.307	2.211	2.307	2.784	2.526	-0.149	-0.043	-0.385	-0.458
H7BYN4	KIF23	Kinesin-like protein	microtubule-based movement;metabolic process;	nucleoplasm;kinesin complex;microtubule;	3.953	4.017	3.883	3.938	2.954	3.062	3.468	3.403	-0.689	-0.615	-0.94	-0.801
P13010	XRCC5	X-ray repair cross-complementing protein 5	telomere maintenance;DNA repair;double-strand break repair;double-strand break repair via nonhomologous end joining;DNA recombination;transcription, DNA-templated;cell proliferation;viral process;positive regulation of type I interferon production;DNA duplex unwinding;innate immune response;negative regulation of transcription, DNA-templated;positive regulation of neurogenesis;hematopoietic stem …	nuclear telomere cap complex;nuclear chromosome, telomeric region;nucleus;nucleoplasm;nucleolus;cytosol;plasma membrane;membrane;Ku70:Ku80 complex;nonhomologous end joining complex;	2.717	2.964	3.805	3.931	2.527	2.633	2.993	2.977	-0.295	-0.256	-0.754	-0.516
P42285	SKIV2L2	Superkiller viralicidic activity 2-like 2	mRNA splicing, via spliceosome;maturation of 5.8S rRNA;RNA catabolic process;	nucleus;nucleoplasm;nucleolus;catalytic step 2 spliceosome;exosome (RNase complex);	2.695	2.918	3.747	3.889	2.537	2.643	2.931	2.846	-0.299	-0.25	-0.746	-0.409
Q14694	USP10	Ubiquitin carboxyl-terminal hydrolase 10	DNA repair;autophagy;regulation of autophagy;protein deubiquitination;translesion synthesis;DNA damage response, signal transduction by p53 class mediator;proteasome-mediated ubiquitin-dependent protein catabolic process;regulation of proteasomal protein catabolic process;	nucleus;nucleoplasm;cytoplasm;early endosome;	3.692	3.924	3.781	4.034	2.992	3.164	3.624	3.548	-1.058	-0.987	-1.362	-1.041
O95347	SMC2	Structural maintenance of chromosomes protein 2	mitotic cell cycle;mitotic chromosome condensation;meiotic chromosome condensation;meiotic chromosome segregation;cell division;kinetochore organization;	nuclear chromosome;condensed chromosome;condensin complex;nucleus;nucleoplasm;cytoplasm;cytosol;extracellular exosome;	2.934	3.098	3.358	3.535	2.798	2.842	3.416	3.296	-0.512	-0.558	-1.076	-0.878
P35222	CTNNB1	Catenin beta-1	negative regulation of transcription from RNA polymerase II promoter;embryonic axis specification;patterning of blood vessels;branching involved in ureteric bud morphogenesis;in utero embryonic development;gastrulation with mouth forming second;cell fate specification;endodermal cell fate commitment;neuron migration;epithelial to mesenchymal transition;neural plate development;positive regulation…	spindle pole;nucleus;nucleoplasm;transcription factor complex;nuclear euchromatin;cytoplasm;centrosome;cytosol;plasma membrane;cell-cell junction;adherens junction;cell-cell adherens junction;fascia adherens;bicellular tight junction;focal adhesion;cell cortex;membrane;basolateral plasma membrane;lateral plasma membrane;catenin complex;Z disc;lamellipodium;cell junction;beta-catenin destruction c…	3.171	3.277	2.729	2.839	2.789	2.895	3.881	3.813	-1.812	-1.623	-1.951	-1.745
E9PL24	PDE4DIP	Myomegalin			3.977	4.109	3.47	3.624	2.959	2.952	3.612	3.493	-0.567	-0.481	-0.807	-0.65
Q9UN86	G3BP2	Ras GTPase-activating protein-binding protein 2	cytoplasmic sequestering of NF-kappaB;Ras protein signal transduction;mRNA transport;	cytoplasm;	3.573	3.457	3.084	3.066	2.721	2.946	3.703	3.656	-1.154	-0.922	-1.511	-1.442
P50995	ANXA11	Annexin A11	phagocytosis;cell cycle;cell division;response to calcium ion;	nuclear envelope;nucleoplasm;cytoplasm;spindle;membrane;midbody;melanosome;specific granule;azurophil granule;phagocytic vesicle;extracellular exosome;	4.467	4.567	3.131	3.354	3.075	3.204	3.841	3.816	-0.784	-0.744	-0.858	-0.64
P15311	EZR	Ezrin	intestinal D-glucose absorption;sphingosine-1-phosphate signaling pathway;cytoskeletal anchoring at plasma membrane;leukocyte cell-cell adhesion;axon guidance;regulation of cell shape;positive regulation of gene expression;protein kinase A signaling;membrane to membrane docking;microvillus assembly;actin cytoskeleton reorganization;receptor internalization;regulation of microvillus length;positiv…	ruffle;uropod;extracellular space;nucleolus;cytoplasm;endosome;cytosol;actin filament;plasma membrane;microvillus;brush border;focal adhesion;actin cytoskeleton;membrane;basolateral plasma membrane;apical plasma membrane;extrinsic component of membrane;filopodium;T-tubule;cortical cytoskeleton;microvillus membrane;vesicle;ruffle membrane;ciliary basal body;cell projection;myelin sheath;cell body;…	2.473	2.661	3.204	3.327	2.62	2.687	3.15	3.033	-0.633	-0.619	-1.454	-1.244
Q9Y5A9	YTHDF2	YTH domain-containing family protein 2	humoral immune response;regulation of mRNA stability;	cytoplasmic mRNA processing body;	3.958	4.058	3.323	3.451	3.032	3.127	3.684	3.609	-0.976	-0.866	-1.115	-0.955
P12268	IMPDH2	Inosine-5'-monophosphate dehydrogenase 2	purine nucleobase metabolic process;GMP biosynthetic process;purine ribonucleoside monophosphate biosynthetic process;small molecule metabolic process;lymphocyte proliferation;protein homotetramerization;nucleobase-containing small molecule metabolic process;oxidation-reduction process;retina development in camera-type eye;cellular response to interleukin-4;	nucleus;cytoplasm;peroxisomal membrane;cytosol;membrane;extracellular exosome;	2.888	3.132	2.31	2.593	2.536	2.611	3.563	3.447	-0.66	-0.62	-0.879	-0.673
Q8TDN6	BRIX1	Ribosome biogenesis protein BRX1 homolog	ribosomal large subunit assembly;	nucleus;nucleolus;	2.233	2.437	3.7	3.657	2.034	2.221	2.414	2.303	-0.281	-0.188	-0.857	-0.5
J3KPP4	LUC7L3	Cisplatin resistance-associated overexpressed protein, isoform CRA_b	mRNA splice site selection;	nucleoplasm;U1 snRNP;	1.981	1.891	2.353	2.36	1.996	2.133	2.335	2.435	-0.213	-0.122	-0.111	-0.174
Q8NC51	SERBP1	Plasminogen activator inhibitor 1 RNA-binding protein	regulation of apoptotic process;regulation of mRNA stability;	nucleus;cytoplasm;plasma membrane;membrane;perinuclear region of cytoplasm;extracellular exosome;	3.185	3.027	3.865	3.563	2.373	2.512	2.969	2.593	-0.525	-0.421	-0.697	-0.771
Q96AY3	FKBP10	Peptidyl-prolyl cis-trans isomerase FKBP10	protein peptidyl-prolyl isomerization;chaperone-mediated protein folding;	cytoplasm;endoplasmic reticulum lumen;endoplasmic reticulum membrane;	2.681	2.876	1.55	1.723	2.774	2.845	3.195	3.132	-0.405	-0.319	-0.84	-0.695
Q7L576	CYFIP1	Cytoplasmic FMR1-interacting protein 1	small GTPase mediated signal transduction;regulation of cell shape;Rac protein signal transduction;lamellipodium assembly;ruffle organization;Fc-gamma receptor signaling pathway involved in phagocytosis;innate immune response;vascular endothelial growth factor receptor signaling pathway;axon extension;cognition;positive regulation of Arp2/3 complex-mediated actin nucleation;	ruffle;cytosol;mRNA cap binding complex;focal adhesion;lamellipodium;SCAR complex;neuron projection;synapse;perinuclear region of cytoplasm;extracellular exosome;	3.284	3.498	3.012	3.096	2.768	2.839	3.566	3.425	-0.761	-0.695	-0.894	-0.678
P68104	EEF1A1	Elongation factor 1-alpha 1	transcription, DNA-templated;regulation of transcription, DNA-templated;translation;translational elongation;gene expression;cellular protein metabolic process;cellular response to epidermal growth factor stimulus;	extracellular space;nucleus;nucleolus;cytoplasm;cytosol;eukaryotic translation elongation factor 1 complex;membrane;cortical actin cytoskeleton;ruffle membrane;myelin sheath;extracellular exosome;nucleus;	2.464	2.628	2.625	2.851	2.363	2.415	2.83	2.705	-0.241	-0.241	-0.474	-0.156
P08133	ANXA6	Annexin A6	calcium ion transport;regulation of muscle contraction;ion transmembrane transport;protein homooligomerization;mitochondrial calcium ion homeostasis;apoptotic signaling pathway;	mitochondrion;lysosomal membrane;focal adhesion;membrane;late endosome membrane;melanosome;perinuclear region of cytoplasm;extracellular exosome;	3.318	3.616	2.993	3.298	2.979	3.036	3.632	3.544	-0.945	-0.89	-1.369	-1.129
P41250	GARS	Glycine--tRNA ligase	tRNA aminoacylation for protein translation;glycyl-tRNA aminoacylation;gene expression;diadenosine tetraphosphate biosynthetic process;	nucleoplasm;cytoplasm;mitochondrial matrix;cytosol;secretory granule;axon;extracellular exosome;	2.767	2.957	3.616	3.871	2.796	2.887	3.002	2.862	-0.195	-0.121	-0.915	-0.622
O14974	PPP1R12A	Protein phosphatase 1 regulatory subunit 12A	G2/M transition of mitotic cell cycle;mitotic cell cycle;protein dephosphorylation;mitotic nuclear division;small GTPase mediated signal transduction;regulation of cell adhesion;regulation of myosin-light-chain-phosphatase activity;negative regulation of catalytic activity;positive regulation of transcription from RNA polymerase II promoter;regulation of nucleocytoplasmic transport;centrosome org…	kinetochore;nucleoplasm;cytoplasm;centrosome;cytosol;focal adhesion;actin cytoskeleton;contractile fiber;PTW/PP1 phosphatase complex;	3.428	3.5	2.81	2.818	2.691	2.822	3.868	3.677	-1.428	-1.336	-1.894	-1.741
Q13283	G3BP1	Ras GTPase-activating protein-binding protein 1	transport;Ras protein signal transduction;DNA duplex unwinding;negative regulation of canonical Wnt signaling pathway;nucleic acid phosphodiester bond hydrolysis;	nucleus;cytoplasm;cytosol;plasma membrane;focal adhesion;cytoplasmic stress granule;	3.349	3.553	3.398	3.623	3.004	3.154	3.763	3.659	-1.251	-1.125	-1.695	-1.613
Q9NVI1	FANCI	Fanconi anemia group I protein	DNA repair;cell cycle;positive regulation of protein ubiquitination;	nucleus;nucleoplasm;cytoplasm;plasma membrane;membrane;	2.951	3.146	3.345	3.676	2.593	2.703	3.317	3.206	-0.623	-0.526	-0.857	-0.509
Q8ND24	RNF214	RING finger protein 214			4.059	4.176	3.785	3.93	3.224	3.326	3.722	3.467	-0.559	-0.508	-0.965	-0.826
O75970	MPDZ	Multiple PDZ domain protein	cell adhesion;viral process;	cytoplasm;bicellular tight junction;postsynaptic density;apical plasma membrane;apicolateral plasma membrane;dendrite;cytoplasmic vesicle;Schmidt-Lanterman incisure;postsynaptic membrane;	3.23	3.363	2.971	3.103	2.543	2.606	3.491	3.157	-0.842	-0.787	-1.173	-0.932
P09429	HMGB1	High mobility group protein B1	negative regulation of transcription from RNA polymerase II promoter;myeloid dendritic cell activation;dendritic cell chemotaxis;inflammatory response to antigenic stimulus;DNA topological change;apoptotic DNA fragmentation;DNA recombination;chromatin remodeling;regulation of transcription from RNA polymerase II promoter;apoptotic process;cellular component disassembly involved in execution phase…	condensed chromosome;extracellular region;extracellular space;nucleus;nucleoplasm;cell surface;transcriptional repressor complex;	2.727	2.694	2.344	2.343	2.676	2.734	3.002	2.931	-0.665	-0.621	-1.055	-1.079
P30153	PPP2R1A	Serine/threonine-protein phosphatase 2A 65 kDa regulatory subunit A alpha isoform	G2/M transition of mitotic cell cycle;nuclear-transcribed mRNA catabolic process, nonsense-mediated decay;inactivation of MAPK activity;mitotic cell cycle;regulation of DNA replication;regulation of transcription, DNA-templated;protein complex assembly;protein dephosphorylation;ceramide metabolic process;apoptotic process;organelle organization;chromosome segregation;mitotic nuclear envelope reas…	protein phosphatase type 2A complex;chromosome, centromeric region;nucleus;mitochondrion;cytosol;microtubule cytoskeleton;membrane;extracellular exosome;	3.055	3.288	2.769	3.078	2.7	2.831	3.425	3.312	-1.041	-0.944	-1.452	-1.128
Q7Z6E9	RBBP6	E3 ubiquitin-protein ligase RBBP6	in utero embryonic development;multicellular organism growth;protein ubiquitination involved in ubiquitin-dependent protein catabolic process;embryonic organ development;somite development;	nucleoplasm;chromosome;nucleolus;cytoplasm;microtubule organizing center;	2.253	2.538	1.963	2.084	2.39	2.445	2.621	2.514	-0.103	-0.027	-0.786	-0.627
Q92973	TNPO1	Transportin-1	protein import into nucleus, translocation;organelle organization;gene expression;viral process;	nucleus;cytoplasm;cytosol;extracellular exosome;primary cilium;	3.668	3.92	3.098	3.399	2.939	2.992	3.632	3.574	-1.044	-1.031	-1.316	-1.049
Q15050	RRS1	Ribosome biogenesis regulatory protein homolog	ribosomal large subunit export from nucleus;endonucleolytic cleavage in ITS1 to separate SSU-rRNA from 5.8S rRNA and LSU-rRNA from tricistronic rRNA transcript (SSU-rRNA, 5.8S rRNA, LSU-rRNA);hematopoietic progenitor cell differentiation;mitotic metaphase plate congression;ribosomal large subunit biogenesis;	condensed nuclear chromosome;nucleus;nucleolus;endoplasmic reticulum;preribosome, large subunit precursor;	0.519	0.637	3.789	3.691	0.924	0.919	0.858	0.74	0.116	0.136	-0.732	-0.595
Q9Y3I0	RTCB	tRNA-splicing ligase RtcB homolog	in utero embryonic development;placenta development;tRNA splicing, via endonucleolytic cleavage and ligation;	nucleus;nuclear envelope;cytoplasm;endoplasmic reticulum membrane;tRNA-splicing ligase complex;	3.351	3.501	3.335	3.545	3.046	3.127	3.576	3.474	-0.689	-0.624	-1.108	-0.922
Q9C0C2	TNKS1BP1	182 kDa tankyrase-1-binding protein	nuclear-transcribed mRNA catabolic process, deadenylation-dependent decay;nuclear-transcribed mRNA poly(A) tail shortening;telomere maintenance via telomerase;gene expression;	nucleus;nucleoplasm;nuclear telomeric heterochromatin;cytoplasm;cytosol;cytoskeleton;plasma membrane;CCR4-NOT complex;	3.848	3.882	3.136	3.31	2.875	3.069	3.763	3.546	-1.162	-1.113	-1.52	-1.249
O15320	CTAGE5	Endoplasmic reticulum export factor CTAGE5	positive regulation of catalytic activity;	membrane;	3.965	4.048	2.884	3.058	2.692	2.819	3.476	3.359	-0.304	-0.217	-0.325	-0.24
Q9NY93	DDX56	Probable ATP-dependent RNA helicase DDX56	rRNA processing;RNA secondary structure unwinding;	nucleolus;membrane;	2.466	2.667	3.917	3.878	2.338	2.372	2.827	2.792	-0.312	-0.25	-0.898	-0.699
P62424	RPL7A	60S ribosomal protein L7a	nuclear-transcribed mRNA catabolic process, nonsense-mediated decay;translation;translational initiation;translational elongation;translational termination;SRP-dependent cotranslational protein targeting to membrane;gene expression;viral process;viral life cycle;viral transcription;ribosome biogenesis;cellular protein metabolic process;	nucleus;nucleolus;cytoplasm;cytosol;focal adhesion;membrane;cytosolic large ribosomal subunit;polysomal ribosome;extracellular exosome;	2.525	2.611	4.143	4.196	2.345	2.425	2.452	2.237	-0.02	-0.006	-0.305	-0.273
P54577	YARS	Tyrosine--tRNA ligase, cytoplasmic	tRNA aminoacylation for protein translation;tyrosyl-tRNA aminoacylation;apoptotic process;signal transduction;gene expression;isoleucyl-tRNA aminoacylation;	extracellular space;nucleus;cytoplasm;cytosol;	2.737	2.871	3.313	3.432	2.692	2.752	3.044	2.947	-0.374	-0.325	-0.885	-0.7
E9PF10	NUP155	Nuclear pore complex protein Nup155	nucleocytoplasmic transport;	nuclear pore;	3.168	3.29	2.823	2.928	2.354	2.492	3.082	2.899	-0.414	-0.341	-0.353	-0.229
P40222	TXLNA	Alpha-taxilin	exocytosis;cell proliferation;B cell activation;activation of mitophagy in response to mitochondrial depolarization;	extracellular region;cytoplasm;membrane;	3.644	3.802	3.762	3.727	2.889	2.964	3.683	3.517	-0.831	-0.797	-1.093	-0.954
P39023	RPL3	60S ribosomal protein L3	ribosomal large subunit assembly;nuclear-transcribed mRNA catabolic process, nonsense-mediated decay;translation;translational initiation;translational elongation;translational termination;SRP-dependent cotranslational protein targeting to membrane;gene expression;viral process;viral life cycle;viral transcription;cellular protein metabolic process;cellular response to interleukin-4;	nucleus;nucleoplasm;nucleolus;cytoplasm;cytosol;focal adhesion;cytosolic large ribosomal subunit;extracellular exosome;	2.385	2.504	3.942	4.101	2.593	2.65	2.608	2.561	-0.052	-0.037	-0.777	-0.531
Q13085	ACACA	Acetyl-CoA carboxylase 1	tissue homeostasis;acetyl-CoA metabolic process;energy reserve metabolic process;fatty acid biosynthetic process;vitamin metabolic process;water-soluble vitamin metabolic process;biotin metabolic process;carnitine shuttle;triglyceride biosynthetic process;positive regulation of cellular metabolic process;long-chain fatty-acyl-CoA biosynthetic process;cellular lipid metabolic process;multicellular…	nucleolus;cytoplasm;mitochondrion;cytosol;actin cytoskeleton;extracellular exosome;	3.004	3.323	2.206	2.326	2.567	2.552	3.19	3.104	-0.631	-0.6	-0.668	-0.34
Q9Y230	RUVBL2	RuvB-like 2	DNA repair;DNA recombination;chromatin organization;chromatin remodeling;transcription, DNA-templated;protein folding;DNA duplex unwinding;cellular response to UV;positive regulation of histone acetylation;regulation of growth;histone H4 acetylation;histone H2A acetylation;positive regulation of transcription from RNA polymerase II promoter;establishment of protein localization to chromatin;cellu…	Swr1 complex;intracellular;nucleus;nucleoplasm;nuclear euchromatin;cytoplasm;membrane;nuclear matrix;ribonucleoprotein complex;Ino80 complex;NuA4 histone acetyltransferase complex;extracellular exosome;MLL1 complex;	2.993	3.109	2.757	2.889	2.838	2.935	3.562	3.406	-0.801	-0.712	-1.098	-0.937
O14617	AP3D1	AP-3 complex subunit delta-1	eye pigment biosynthetic process;intracellular protein transport;anterograde axon cargo transport;melanosome organization;protein localization to organelle;endosome to melanosome transport;antigen processing and presentation, exogenous lipid antigen via MHC class Ib;anterograde synaptic vesicle transport;synaptic vesicle membrane organization;positive regulation of NK T cell differentiation;regul…	Golgi membrane;nucleoplasm;lysosomal membrane;Golgi apparatus;endosome membrane;membrane;membrane coat;terminal bouton;	3.044	3.269	3.612	3.783	2.797	2.896	3.205	3.25	-0.615	-0.55	-0.87	-0.623
P50991	CCT4	T-complex protein 1 subunit delta	protein folding;binding of sperm to zona pellucida;cellular protein metabolic process;'de novo' posttranslational protein folding;toxin transport;	zona pellucida receptor complex;nucleoplasm;cytoplasm;centrosome;cytosol;chaperonin-containing T-complex;microtubule;melanosome;cell body;extracellular exosome;	2.829	3.117	3.141	3.308	2.502	2.598	3.212	3.113	-0.561	-0.504	-1.067	-0.772
Q9H2U1	DHX36	ATP-dependent RNA helicase DHX36	ossification;transcription, DNA-templated;RNA processing;response to virus;RNA secondary structure unwinding;positive regulation of telomere maintenance;positive regulation of type I interferon production;response to exogenous dsRNA;innate immune response;positive regulation of transcription from RNA polymerase II promoter;	chromosome, telomeric region;nucleus;cytoplasm;cytosol;extracellular exosome;	3.118	3.264	3.368	3.49	2.676	2.733	3.09	3.072	-0.464	-0.405	-0.659	-0.459
Q86UK7	ZNF598	E3 ubiquitin-protein ligase ZNF598			3.347	3.214	3.422	3.459	2.516	2.567	3.172	2.954	-0.606	-0.487	-0.743	-0.71
A0A0B4J1V8	PPAN-P2RY11	HCG2039996	G-protein coupled receptor signaling pathway;	integral component of membrane;	2.962	3.045	3.993	4.027	2.547	2.693	2.862	2.728	-0.051	0.094	-0.328	-0.278
Q9UQ80	PA2G4	Proliferation-associated protein 2G4	transcription, DNA-templated;rRNA processing;regulation of translation;cell cycle arrest;cell proliferation;negative regulation of apoptotic process;positive regulation of cell differentiation;negative regulation of transcription, DNA-templated;	nucleus;nucleoplasm;nucleolus;cytoplasm;membrane;ribonucleoprotein complex;extracellular exosome;	2.828	2.884	4.278	4.394	2.522	2.574	2.945	2.902	-0.399	-0.383	-0.673	-0.609
O94874	UFL1	E3 UFM1-protein ligase 1	osteoblast differentiation;positive regulation of cell proliferation;negative regulation of protein ubiquitination;negative regulation of NF-kappaB transcription factor activity;regulation of proteasomal ubiquitin-dependent protein catabolic process;regulation of protein localization;regulation of intracellular estrogen receptor signaling pathway;response to endoplasmic reticulum stress;positive …	nucleus;nucleoplasm;cytoplasm;endoplasmic reticulum;endoplasmic reticulum membrane;cytosol;membrane;neuron projection;protein complex;	2.601	2.835	3.371	3.496	2.528	2.63	2.881	2.725	-0.314	-0.24	-0.975	-0.799
Q01085-2	TIAL1	Isoform 2 of Nucleolysin TIAR	regulation of transcription from RNA polymerase II promoter;apoptotic process;defense response;germ cell development;positive regulation of cell proliferation;stem cell division;	nucleus;cytoplasm;lysosome;cytoplasmic stress granule;extracellular exosome;	3.52	3.717	3.352	3.589	2.911	3.094	3.567	3.506	-0.758	-0.684	-1.043	-0.894
Q9Y265	RUVBL1	RuvB-like 1	DNA repair;DNA recombination;chromatin organization;nucleosome assembly;transcription, DNA-templated;regulation of transcription from RNA polymerase II promoter;mitotic nuclear division;spermatogenesis;DNA duplex unwinding;CENP-A containing nucleosome assembly;regulation of growth;histone H4 acetylation;histone H2A acetylation;cell division;regulation of mitochondrion degradation;positive regulat…	Swr1 complex;nucleus;nucleoplasm;cytoplasm;Golgi apparatus;microtubule organizing center;membrane;nuclear matrix;Ino80 complex;NuA4 histone acetyltransferase complex;intracellular membrane-bounded organelle;extracellular exosome;MLL1 complex;	3.289	3.6	2.974	3.181	2.814	2.922	3.709	3.599	-1.014	-0.9	-1.366	-1.103
P49756	RBM25	RNA-binding protein 25	regulation of alternative mRNA splicing, via spliceosome;mRNA processing;RNA splicing;regulation of apoptotic process;	nucleoplasm;spliceosomal complex;cytoplasm;nuclear speck;	2.847	2.944	2.126	2.251	2.203	2.366	2.671	2.598	-0.526	-0.408	-0.883	-0.81
Q96Q15	SMG1	Serine/threonine-protein kinase SMG1	nuclear-transcribed mRNA catabolic process, nonsense-mediated decay;double-strand break repair via homologous recombination;mRNA export from nucleus;response to stress;gene expression;peptidyl-serine phosphorylation;protein autophosphorylation;phosphatidylinositol phosphorylation;	nucleus;cytoplasm;cytosol;	3.18	3.309	3.121	3.253	2.631	2.733	3.366	3.206	-0.691	-0.571	-0.84	-0.636
Q9UNX4	WDR3	WD repeat-containing protein 3	maturation of SSU-rRNA from tricistronic rRNA transcript (SSU-rRNA, 5.8S rRNA, LSU-rRNA);	nucleus;nucleolus;nuclear membrane;small-subunit processome;Pwp2p-containing subcomplex of 90S preribosome;	2.874	3.194	3.984	4.239	2.634	2.76	3.033	2.98	-0.313	-0.271	-0.846	-0.517
Q8TEW0	PARD3	Partitioning defective 3 homolog	microtubule cytoskeleton organization;apical constriction;protein complex assembly;protein targeting to membrane;cell cycle;establishment or maintenance of cell polarity;transforming growth factor beta receptor signaling pathway;protein kinase C-activating G-protein coupled receptor signaling pathway;axonogenesis;asymmetric cell division;negative regulation of peptidyl-threonine phosphorylation;m…	spindle;cytosol;plasma membrane;cell-cell junction;cell-cell adherens junction;bicellular tight junction;cell cortex;endomembrane system;cell junction;internode region of axon;neuronal cell body;protein complex;axonal growth cone;apical part of cell;	3.045	3.041	2.461	2.422	2.129	2.368	3.327	3.032	-0.998	-0.816	-1.293	-1.316
P61221	ABCE1	ATP-binding cassette sub-family E member 1	RNA catabolic process;response to virus;viral process;negative regulation of catalytic activity;transmembrane transport;	cytoplasm;mitochondrion;mitochondrial matrix;membrane;	3.332	3.471	2.972	3.293	2.718	2.794	3.499	3.471	-0.884	-0.804	-1.109	-0.806
P54886	ALDH18A1	Delta-1-pyrroline-5-carboxylate synthase	glutamate metabolic process;proline biosynthetic process;ornithine biosynthetic process;cellular amino acid biosynthetic process;phosphorylation;citrulline biosynthetic process;cellular nitrogen compound metabolic process;small molecule metabolic process;oxidation-reduction process;L-proline biosynthetic process;	cytoplasm;mitochondrion;mitochondrial inner membrane;	2.876	3.056	2.63	2.839	2.466	2.542	2.806	2.657	-0.128	-0.049	-0.346	-0.083
O43175	PHGDH	D-3-phosphoglycerate dehydrogenase	glutamine metabolic process;glycine metabolic process;L-serine biosynthetic process;threonine metabolic process;brain development;cellular amino acid biosynthetic process;gamma-aminobutyric acid metabolic process;regulation of gene expression;taurine metabolic process;spinal cord development;glial cell development;neural tube development;neuron projection development;cellular nitrogen compound me…	cytosol;myelin sheath;extracellular exosome;	3.056	3.242	2.845	3.015	2.871	2.91	3.645	3.554	-0.877	-0.839	-1.154	-0.994
P31948	STIP1	Stress-induced-phosphoprotein 1	response to stress;	nucleus;Golgi apparatus;myelin sheath;protein complex;	3.023	3.256	2.863	3.034	2.813	2.98	3.608	3.453	-0.985	-0.879	-1.525	-1.333
P34897	SHMT2	Serine hydroxymethyltransferase, mitochondrial	L-serine biosynthetic process;one-carbon metabolic process;positive regulation of cell proliferation;glycine biosynthetic process from serine;tetrahydrofolate interconversion;protein homotetramerization;	mitochondrion;mitochondrial inner membrane;mitochondrial intermembrane space;mitochondrial matrix;microtubule cytoskeleton;mitochondrial nucleoid;extracellular exosome;	2.644	2.895	2.958	3.169	2.472	2.676	2.983	2.738	-0.239	-0.103	-0.755	-0.484
Q8WWK9-5	CKAP2	Isoform 3 of Cytoskeleton-associated protein 2	mitotic cytokinesis;apoptotic process;negative regulation of microtubule depolymerization;positive regulation of transcription from RNA polymerase II promoter;	spindle pole;cytoplasm;centrosome;microtubule cytoskeleton;cytoplasmic microtubule;	3.736	3.704	3.774	3.848	2.974	3.098	3.172	3.07	-0.057	0.019	-0.314	-0.258
Q4G0J3	LARP7	La-related protein 7	RNA processing;	nucleus;nucleoplasm;cytoplasm;Golgi apparatus;ribonucleoprotein complex;	2.723	2.914	3.796	3.946	2.518	2.538	2.854	2.706	-0.16	-0.14	-0.756	-0.606
O15213	WDR46	WD repeat-containing protein 46	maturation of SSU-rRNA from tricistronic rRNA transcript (SSU-rRNA, 5.8S rRNA, LSU-rRNA);positive regulation of protein targeting to mitochondrion;	nucleolus;90S preribosome;small-subunit processome;	2.653	2.706	3.794	3.843	2.332	2.357	2.716	2.54	0.011	0.069	-0.639	-0.513
P17987	TCP1	T-complex protein 1 subunit alpha	protein folding;tubulin complex assembly;binding of sperm to zona pellucida;translocation of peptides or proteins into host cell cytoplasm;cellular protein metabolic process;'de novo' posttranslational protein folding;toxin transport;regulation of macrophage apoptotic process;	pericentriolar material;acrosomal vesicle;zona pellucida receptor complex;nuclear heterochromatin;Golgi apparatus;centrosome;cytosol;chaperonin-containing T-complex;microtubule;myelin sheath;cell body;extracellular exosome;	2.977	3.141	2.855	3.111	2.556	2.653	3.271	3.178	-0.411	-0.3	-0.694	-0.46
P27694	RPA1	Replication protein A 70 kDa DNA-binding subunit	G1/S transition of mitotic cell cycle;mitotic cell cycle;nucleotide-excision repair, DNA damage removal;telomere maintenance via recombination;telomere maintenance;double-strand break repair via homologous recombination;DNA recombinase assembly;in utero embryonic development;DNA replication;DNA-dependent DNA replication;DNA strand elongation involved in DNA replication;DNA repair;transcription-co…	lateral element;male germ cell nucleus;nucleus;nucleoplasm;DNA replication factor A complex;PML body;PML body;	2.874	3.223	3.401	3.565	2.646	2.766	3.049	3.066	-0.509	-0.463	-0.753	-0.522
P25440	BRD2	Bromodomain-containing protein 2	nucleosome assembly;transcription, DNA-templated;regulation of transcription from RNA polymerase II promoter;spermatogenesis;chromatin modification;	nucleus;cytoplasm;	2.757	2.894	2.173	2.356	2.628	2.708	3.11	2.912	-0.468	-0.422	-0.853	-0.713
P26196	DDX6	Probable ATP-dependent RNA helicase DDX6	nuclear-transcribed mRNA catabolic process, deadenylation-dependent decay;regulation of translation;gene expression;RNA secondary structure unwinding;viral RNA genome packaging;stem cell maintenance;cytoplasmic mRNA processing body assembly;exonucleolytic nuclear-transcribed mRNA catabolic process involved in deadenylation-dependent decay;negative regulation of neuron differentiation;	cytoplasmic mRNA processing body;cytoplasm;cytosol;cytoplasmic stress granule;membrane;RISC complex;intracellular membrane-bounded organelle;	3.248	3.407	3.539	3.697	2.694	2.765	3.402	3.351	-0.911	-0.806	-1.405	-1.186
Q15717	ELAVL1	ELAV-like protein 1	multicellular organismal development;gene expression;positive regulation of translation;mRNA stabilization;3'-UTR-mediated mRNA stabilization;regulation of stem cell maintenance;	nucleus;nucleoplasm;cytoplasm;cytosol;membrane;	2.951	3.133	3.782	3.905	2.764	2.846	3.188	3.065	-0.411	-0.395	-0.997	-0.836
Q13838	DDX39B	Spliceosome RNA helicase DDX39B	spliceosomal complex assembly;mRNA splicing, via spliceosome;mRNA export from nucleus;cellular response to DNA damage stimulus;RNA splicing;RNA secondary structure unwinding;positive regulation of DNA-templated transcription, elongation;viral mRNA export from host cell nucleus;negative regulation of DNA damage checkpoint;	transcription export complex;nucleus;nucleoplasm;spliceosomal complex;nuclear speck;U4 snRNP;U6 snRNP;cytoplasm;	2.796	2.956	3.432	3.542	2.496	2.595	3.029	2.987	-0.39	-0.346	-0.852	-0.61
Q9Y383	LUC7L2	Putative RNA-binding protein Luc7-like 2	mRNA splice site selection;	U1 snRNP;nuclear speck;	1.271	1.476	0.508	0.587	1.124	1.197	1.291	1.025	0.032	0.205	-0.11	0.019
Q92734	TFG	Protein TFG	signal transduction;positive regulation of I-kappaB kinase/NF-kappaB signaling;	cytoplasm;extracellular exosome;	4.286	4.423	2.115	2.299	2.91	3.094	3.491	3.354	-0.414	-0.331	-0.239	-0.038
Q9H0D6	XRN2	5'-3' exoribonuclease 2	DNA catabolic process, exonucleolytic;DNA-templated transcription, termination;regulation of transcription, DNA-templated;RNA processing;mRNA processing;RNA catabolic process;spermatogenesis;cell growth;RNA metabolic process;RNA phosphodiester bond hydrolysis, exonucleolytic;	nucleus;nucleolus;membrane;aggresome;	2.706	2.731	3.623	3.687	2.493	2.523	2.914	2.695	-0.124	-0.051	-0.664	-0.613
P37802	TAGLN2	Transgelin-2	epithelial cell differentiation;	vesicle;extracellular exosome;	3.909	4.085	2.781	2.997	2.975	3.07	3.838	3.81	-1.097	-0.983	-1.204	-1.029
P49750	YLPM1	YLP motif-containing protein 1	negative regulation of transcription from RNA polymerase II promoter;transcription, DNA-templated;regulation of telomere maintenance;	nucleus;nucleoplasm;cytoplasm;nuclear speck;	2.692	2.713	2.586	2.522	2.11	2.158	2.743	2.554	-0.216	-0.097	-0.429	-0.459
Q5TAX3	ZCCHC11	Terminal uridylyltransferase 4	miRNA metabolic process;miRNA catabolic process;stem cell maintenance;pre-miRNA processing;RNA 3'-end processing;histone mRNA catabolic process;	extracellular space;nucleolus;cytoplasm;extracellular exosome;	3.422	3.578	3.345	3.494	2.779	2.905	3.395	3.238	-0.599	-0.537	-0.78	-0.587
O14964	HGS	Hepatocyte growth factor-regulated tyrosine kinase substrate	protein targeting to lysosome;post-Golgi vesicle-mediated transport;signal transduction;epidermal growth factor receptor signaling pathway;negative regulation of cell proliferation;endosome to lysosome transport;membrane invagination;positive regulation of gene expression;endosomal transport;negative regulation of epidermal growth factor receptor signaling pathway;regulation of protein catabolic …	cytoplasm;endosome;early endosome;cytosol;secretory granule;early endosome membrane;multivesicular body membrane;intracellular membrane-bounded organelle;extracellular exosome;	4.361	4.32	2.92	2.849	2.966	3.07	3.643	3.341	-0.339	-0.293	-0.321	-0.339
P16403	HIST1H1C	Histone H1.2	negative regulation of transcription from RNA polymerase II promoter;nucleosome assembly;nucleosome positioning;	nucleosome;nucleus;nuclear euchromatin;transcriptionally active chromatin;	0.399	0.348	4.348	4.338	0.57	0.61	0.298	0.166	0.253	0.273	-0.416	-0.421
Q96T37	RBM15	Putative RNA-binding protein 15	patterning of blood vessels;positive regulation of transcription of Notch receptor target;viral process;negative regulation of myeloid cell differentiation;spleen development;ventricular septum morphogenesis;placenta blood vessel development;negative regulation of transcription, DNA-templated;	nucleoplasm;nuclear membrane;	2.886	3.027	3.238	3.444	2.724	2.793	3.09	2.897	-0.22	-0.203	-0.836	-0.685
P49368	CCT3	T-complex protein 1 subunit gamma	protein folding;binding of sperm to zona pellucida;cellular protein metabolic process;pore complex assembly;'de novo' posttranslational protein folding;toxin transport;	zona pellucida receptor complex;cytoplasm;cytosol;chaperonin-containing T-complex;cytoskeleton;microtubule;plasma membrane;myelin sheath;cell body;extracellular exosome;	2.849	3.073	3.25	3.43	2.802	2.893	3.332	3.221	-0.675	-0.586	-1.11	-0.849
P25705	ATP5A1	ATP synthase subunit alpha, mitochondrial	negative regulation of endothelial cell proliferation;lipid metabolic process;ATP biosynthetic process;embryo development;ATP hydrolysis coupled proton transport;respiratory electron transport chain;mitochondrial ATP synthesis coupled proton transport;cellular metabolic process;small molecule metabolic process;	mitochondrion;mitochondrial inner membrane;mitochondrial proton-transporting ATP synthase complex;mitochondrial matrix;plasma membrane;membrane;myelin sheath;proton-transporting ATP synthase complex, catalytic core F(1);extracellular exosome;COP9 signalosome;	2.478	2.681	2.958	3.208	2.609	2.632	2.853	2.707	-0.082	0.009	-0.671	-0.477
F5GZS6	SLC3A2	4F2 cell-surface antigen heavy chain	carbohydrate metabolic process;	nucleus;nucleoplasm;cytoplasm;plasma membrane;	2.707	2.88	1.853	2.16	2.908	2.936	3.226	3.163	-0.7	-0.677	-1.249	-0.976
P26640	VARS	Valine--tRNA ligase	tRNA aminoacylation for protein translation;valyl-tRNA aminoacylation;regulation of translational fidelity;gene expression;	mitochondrion;cytosol;cytosol;	2.838	3.023	2.687	2.927	2.578	2.586	3.184	3.062	-0.519	-0.441	-0.613	-0.379
Q9UHB9	SRP68	Signal recognition particle subunit SRP68	translation;SRP-dependent cotranslational protein targeting to membrane;gene expression;response to drug;cellular protein metabolic process;protein targeting to ER;	nucleolus;cytoplasm;endoplasmic reticulum;signal recognition particle, endoplasmic reticulum targeting;cytosol;ribosome;focal adhesion;	3.068	3.185	3.389	3.555	2.625	2.715	3.259	3.364	-0.747	-0.618	-1.146	-0.976
P57740	NUP107	Nuclear pore complex protein Nup107	mitotic cell cycle;carbohydrate metabolic process;mRNA export from nucleus;mitotic nuclear envelope disassembly;small GTPase mediated signal transduction;hexose transport;gene expression;regulation of glucose transport;protein transport;glucose transport;viral process;protein sumoylation;viral life cycle;viral transcription;cytokine-mediated signaling pathway;cellular response to heat;post-transl…	condensed chromosome kinetochore;nuclear envelope;nuclear pore;nucleoplasm;centrosome;cytosol;membrane;nuclear pore outer ring;nuclear membrane;nuclear periphery;kinetochore;	3.639	3.748	3.314	3.534	2.857	2.956	3.599	3.491	-0.814	-0.703	-1.115	-0.875
P06576	ATP5B	ATP synthase subunit beta, mitochondrial	angiogenesis;osteoblast differentiation;generation of precursor metabolites and energy;lipid metabolic process;ATP biosynthetic process;negative regulation of cell adhesion involved in substrate-bound cell migration;organelle organization;mitochondrion organization;ATP hydrolysis coupled proton transport;proton transport;respiratory electron transport chain;mitochondrial ATP synthesis coupled pro…	nucleus;mitochondrion;mitochondrial proton-transporting ATP synthase complex;mitochondrial proton-transporting ATP synthase, catalytic core;mitochondrial matrix;plasma membrane;cell surface;membrane;mitochondrial membrane;mitochondrial nucleoid;myelin sheath;extracellular exosome;	2.351	2.59	3.144	3.438	2.8	2.834	2.802	2.729	0.079	0.054	-0.721	-0.461
O95793	STAU1	Double-stranded RNA-binding protein Staufen homolog 1	intracellular mRNA localization;positive regulation of viral genome replication;positive regulation by virus of viral protein levels in host cell;	cytoplasm;endoplasmic reticulum;rough endoplasmic reticulum;microtubule associated complex;plasma membrane;cytoplasmic stress granule;membrane;dendrite;cytoplasmic ribonucleoprotein granule;neuronal cell body;cell body;extracellular exosome;	4.073	4.296	3.602	3.837	3.165	3.219	3.691	3.657	-1.071	-0.982	-1.429	-1.181
P60228	EIF3E	Eukaryotic translation initiation factor 3 subunit E	nuclear-transcribed mRNA catabolic process, nonsense-mediated decay;formation of translation preinitiation complex;translation;translational initiation;regulation of translational initiation;gene expression;cellular protein metabolic process;negative regulation of translational initiation;	nucleus;nucleoplasm;cytoplasm;cytosol;eukaryotic translation initiation factor 3 complex;membrane;eukaryotic 43S preinitiation complex;eukaryotic 48S preinitiation complex;extracellular exosome;chromatin;PML body;	3.298	3.601	3.189	3.427	2.996	3.145	3.735	3.677	-1.36	-1.281	-1.657	-1.448
O43719	HTATSF1	HIV Tat-specific factor 1	transcription, DNA-templated;regulation of transcription from RNA polymerase II promoter;viral genome replication;regulation of DNA-templated transcription, elongation;	nucleus;nucleoplasm;	2.611	2.777	0.897	1.141	2.588	2.67	2.895	2.793	-0.103	0.026	-0.393	-0.201
O00410	IPO5	Importin-5	NLS-bearing protein import into nucleus;ribosomal protein import into nucleus;viral process;negative regulation of GTPase activity;positive regulation of protein import into nucleus;cellular response to amino acid stimulus;	nucleus;nuclear pore;nucleoplasm;nucleolus;cytoplasm;Golgi apparatus;membrane;nuclear membrane;intracellular membrane-bounded organelle;	3.659	3.976	3.222	3.628	2.912	2.903	3.424	3.381	-0.521	-0.515	-0.725	-0.377
Q9H3U1-2	UNC45A	Isoform 2 of Protein unc-45 homolog A	muscle organ development;cell differentiation;chaperone-mediated protein folding;	nucleoplasm;cytoplasm;Golgi apparatus;perinuclear region of cytoplasm;	3.405	3.648	3.19	3.417	2.82	2.945	3.666	3.556	-1.012	-0.93	-1.268	-0.979
P62258	YWHAE	14-3-3 protein epsilon	G2/M transition of mitotic cell cycle;mitotic cell cycle;neuron migration;regulation of heart rate by hormone;transcription initiation from RNA polymerase II promoter;protein targeting;apoptotic process;organelle organization;small GTPase mediated signal transduction;gene expression;programmed cell death;viral process;substantia nigra development;hippocampus development;cerebral cortex developmen…	mitochondrion;cytosol;kinesin complex;focal adhesion;membrane;axon;cytoplasmic vesicle membrane;melanosome;extracellular exosome;	3.085	3.194	2.961	3.079	2.932	3.028	3.727	3.56	-0.86	-0.8	-1.364	-1.191
Q86VP6	CAND1	Cullin-associated NEDD8-dissociated protein 1	SCF complex assembly;protein ubiquitination;cell differentiation;negative regulation of catalytic activity;positive regulation of RNA polymerase II transcriptional preinitiation complex assembly;	ubiquitin ligase complex;nucleus;nucleoplasm;cytoplasm;membrane;cullin-RING ubiquitin ligase complex;extracellular exosome;	3.162	3.401	3.158	3.483	2.777	2.766	3.61	3.532	-0.906	-0.836	-1.185	-0.883
P61247	RPS3A	40S ribosomal protein S3a	nuclear-transcribed mRNA catabolic process, nonsense-mediated decay;translation;translational initiation;translational elongation;translational termination;SRP-dependent cotranslational protein targeting to membrane;gene expression;viral process;viral life cycle;viral transcription;cell differentiation;negative regulation of apoptotic process;cellular protein metabolic process;	nucleus;nucleolus;cytoplasm;cytosol;focal adhesion;cytosolic small ribosomal subunit;ribonucleoprotein complex;extracellular exosome;	2.606	2.737	4.033	4.19	2.467	2.596	2.995	2.826	-0.597	-0.552	-1.014	-0.852
Q8IXT5	RBM12B	RNA-binding protein 12B			2.971	2.973	3.063	3.063	2.3	2.306	2.781	2.582	-0.27	-0.305	-0.751	-0.721
Q14103	HNRNPD	Heterogeneous nuclear ribonucleoprotein D0	mRNA splicing, via spliceosome;transcription, DNA-templated;regulation of transcription, DNA-templated;RNA processing;RNA catabolic process;RNA splicing;gene expression;regulation of circadian rhythm;positive regulation of translation;positive regulation of transcription, DNA-templated;mRNA stabilization;circadian regulation of translation;	nucleus;nucleoplasm;cytosol;ribonucleoprotein complex;extracellular exosome;	2.62	2.816	4.035	4.247	2.677	2.693	2.929	2.852	-0.411	-0.387	-1.145	-0.937
P55884	EIF3B	Eukaryotic translation initiation factor 3 subunit B	formation of translation preinitiation complex;translation;translational initiation;regulation of translational initiation;gene expression;cellular protein metabolic process;	nucleoplasm;cytoplasm;cytosol;eukaryotic translation initiation factor 3 complex;eukaryotic 43S preinitiation complex;eukaryotic 48S preinitiation complex;extracellular exosome;eukaryotic translation initiation factor 3 complex, eIF3m;	3.027	3.256	3.678	3.945	2.704	2.812	3.367	3.292	-0.723	-0.583	-1.146	-0.908
Q07666	KHDRBS1	KH domain-containing, RNA-binding, signal transduction-associated protein 1	G2/M transition of mitotic cell cycle;transcription, DNA-templated;mRNA processing;cell cycle arrest;signal transduction;cell surface receptor signaling pathway;cell proliferation;positive regulation of signal transduction;negative regulation of transcription, DNA-templated;positive regulation of translational initiation;regulation of RNA export from nucleus;positive regulation of RNA export from…	nucleus;nucleoplasm;cytoplasm;membrane;Grb2-Sos complex;	2.89	2.938	2.542	2.738	2.573	2.698	3.278	3.068	-0.38	-0.32	-0.924	-0.812
P04406	GAPDH	Glyceraldehyde-3-phosphate dehydrogenase	microtubule cytoskeleton organization;carbohydrate metabolic process;glucose metabolic process;gluconeogenesis;negative regulation of translation;peptidyl-cysteine S-trans-nitrosylation;small molecule metabolic process;protein stabilization;neuron apoptotic process;oxidation-reduction process;canonical glycolysis;cellular response to interferon-gamma;	nucleus;cytoplasm;lipid particle;cytosol;plasma membrane;microtubule cytoskeleton;membrane;ribonucleoprotein complex;nuclear membrane;vesicle;intracellular membrane-bounded organelle;perinuclear region of cytoplasm;extracellular exosome;GAIT complex;	2.373	2.659	2.616	2.941	2.285	2.296	2.847	2.755	0.012	0.056	-0.687	-0.386
P22087	FBL	rRNA 2'-O-methyltransferase fibrillarin	box C/D snoRNA 3'-end processing;osteoblast differentiation;rRNA processing;tRNA processing;rRNA methylation;histone glutamine methylation;	dense fibrillar component;granular component;nucleus;nucleolus;Cajal body;membrane;box C/D snoRNP complex;small-subunit processome;extracellular exosome;	2.664	2.774	4.213	4.437	2.514	2.65	2.864	2.855	-0.25	-0.167	-0.702	-0.597
P04843	RPN1	Dolichyl-diphosphooligosaccharide--protein glycosyltransferase subunit 1	translation;cellular protein modification process;SRP-dependent cotranslational protein targeting to membrane;gene expression;protein N-linked glycosylation via asparagine;post-translational protein modification;cellular protein metabolic process;	endoplasmic reticulum membrane;rough endoplasmic reticulum;oligosaccharyltransferase complex;membrane;integral component of membrane;melanosome;	2.847	3.047	3.058	3.277	2.743	2.781	3.051	3.014	-0.336	-0.306	-0.819	-0.555
P06733	ENO1	Alpha-enolase	negative regulation of transcription from RNA polymerase II promoter;carbohydrate metabolic process;glucose metabolic process;gluconeogenesis;transcription, DNA-templated;response to virus;negative regulation of cell growth;small molecule metabolic process;negative regulation of transcription, DNA-templated;canonical glycolysis;	phosphopyruvate hydratase complex;extracellular space;nucleus;cytoplasm;cytosol;plasma membrane;membrane;M band;extracellular exosome;	2.375	2.662	3.137	3.241	2.543	2.572	2.924	2.834	0.042	0.042	-0.677	-0.43
O94855	SEC24D	Protein transport protein Sec24D	in utero embryonic development;antigen processing and presentation of peptide antigen via MHC class I;intracellular protein transport;ER to Golgi vesicle-mediated transport;protein N-linked glycosylation via asparagine;antigen processing and presentation of exogenous peptide antigen via MHC class II;post-translational protein modification;cellular protein metabolic process;small molecule metaboli…	Golgi membrane;endoplasmic reticulum membrane;cytosol;ER to Golgi transport vesicle membrane;COPII vesicle coat;perinuclear region of cytoplasm;	3.905	3.874	2.474	2.651	2.769	2.879	3.503	3.495	-0.784	-0.704	-0.711	-0.515
Q9Y3F4	STRAP	Serine-threonine kinase receptor-associated protein	negative regulation of transcription from RNA polymerase II promoter;spliceosomal snRNP assembly;transforming growth factor beta receptor signaling pathway;negative regulation of epithelial cell migration;negative regulation of epithelial to mesenchymal transition;maintenance of gastrointestinal epithelium;negative regulation of transforming growth factor beta receptor signaling pathway;negative …	nucleus;nucleoplasm;cytoplasm;cytosol;plasma membrane;SMN complex;SMN-Sm protein complex;	3.621	3.71	3.441	3.635	3.112	3.229	3.867	3.784	-0.953	-0.884	-1.286	-1.158
Q9NTI5	PDS5B	Sister chromatid cohesion protein PDS5 homolog B	mitotic cell cycle;mitotic sister chromatid cohesion;cell proliferation;negative regulation of cell proliferation;regulation of cell proliferation;cell division;	chromosome, centromeric region;chromatin;nucleus;nucleoplasm;chromosome;cytosol;	2.759	3.006	3.433	3.658	2.636	2.735	3.135	3.005	-0.258	-0.196	-0.901	-0.605
Q9BXJ9	NAA15	N-alpha-acetyltransferase 15, NatA auxiliary subunit	angiogenesis;transcription, DNA-templated;N-terminal protein amino acid acetylation;cell differentiation;negative regulation of apoptotic process;positive regulation of transcription, DNA-templated;protein stabilization;	nucleus;transcription factor complex;cytoplasm;membrane;NatA complex;	3.477	3.567	3.805	3.968	2.7	2.745	3.351	3.235	-0.726	-0.626	-0.735	-0.553
P19367	HK1	Hexokinase-1	cellular glucose homeostasis;carbohydrate metabolic process;glucose metabolic process;glycolytic process;hexose transport;glucose transport;small molecule metabolic process;carbohydrate phosphorylation;glucose 6-phosphate metabolic process;transmembrane transport;canonical glycolysis;	mitochondrion;mitochondrial outer membrane;cytosol;membrane raft;sperm principal piece;	3.451	3.717	2.835	3.092	2.886	2.916	3.237	3.051	0.071	0.072	-0.097	0.148
P33527	ABCC1	Multidrug resistance-associated protein 1	leukotriene metabolic process;vitamin metabolic process;water-soluble vitamin metabolic process;transport;cobalamin metabolic process;arachidonic acid metabolic process;response to drug;small molecule metabolic process;transmembrane transport;	plasma membrane;integral component of plasma membrane;membrane;basolateral plasma membrane;extracellular exosome;	2.921	3.129	1.479	1.775	2.586	2.659	2.921	2.738	-0.347	-0.31	-0.799	-0.501
Q15366	PCBP2	Poly(rC)-binding protein 2	mRNA splicing, via spliceosome;RNA splicing;gene expression;mRNA metabolic process;negative regulation of type I interferon production;proteasome-mediated ubiquitin-dependent protein catabolic process;innate immune response;negative regulation of defense response to virus;defense response to virus;	nucleus;nucleoplasm;cytoplasm;cytosol;focal adhesion;membrane;ribonucleoprotein complex;extracellular exosome;	3.708	3.812	3.539	3.644	3.016	3.077	3.578	3.561	-0.708	-0.638	-0.954	-0.907
P42356	PI4KA	Phosphatidylinositol 4-kinase alpha	phospholipid metabolic process;phosphatidylinositol biosynthetic process;signal transduction;small molecule metabolic process;phosphatidylinositol phosphorylation;phosphatidylinositol-mediated signaling;	cytoplasm;cytosol;plasma membrane;focal adhesion;membrane;Golgi-associated vesicle membrane;extracellular exosome;	3.387	3.509	2.834	3.17	2.692	2.826	3.39	3.195	-0.887	-0.767	-0.904	-0.695
Q14498	RBM39	RNA-binding protein 39	transcription, DNA-templated;regulation of transcription, DNA-templated;RNA processing;mRNA processing;RNA splicing;	nucleoplasm;microtubule organizing center;microtubule cytoskeleton;nuclear speck;	2.302	2.532	2.11	2.282	2.368	2.426	2.688	2.598	-0.572	-0.57	-1.372	-1.181
M0R2B7	POLD1	DNA polymerase	DNA-dependent DNA replication;DNA replication proofreading;DNA biosynthetic process;nucleic acid phosphodiester bond hydrolysis;	nucleoplasm;cytoplasm;aggresome;delta DNA polymerase complex;	3.024	3.403	3.228	3.356	2.712	2.783	3.222	3.11	-0.503	-0.424	-0.787	-0.537
Q9GZR2	REXO4	RNA exonuclease 4	regulation of transcription, DNA-templated;nucleic acid phosphodiester bond hydrolysis;	nucleus;nucleolus;	1.075	1.184	4.068	4.146	1.022	1.05	0.944	0.825	-0.028	-0.016	-0.896	-0.836
P47897	QARS	Glutamine--tRNA ligase	tRNA aminoacylation for protein translation;glutaminyl-tRNA aminoacylation;brain development;gene expression;	cytoplasm;mitochondrial matrix;cytosol;	3.062	3.313	3.169	3.484	2.682	2.765	3.455	3.201	-0.667	-0.622	-0.991	-0.594
O43491	EPB41L2	Band 4.1-like protein 2	cortical actin cytoskeleton organization;	nucleus;nucleoplasm;plasma membrane;focal adhesion;spectrin;extrinsic component of membrane;cell junction;extracellular exosome;COP9 signalosome;	2.655	2.756	2.479	2.53	2.411	2.598	3.449	3.25	-0.983	-0.793	-1.459	-1.4
P62805	HIST1H4A	Histone H4	chromatin silencing at rDNA;mitotic cell cycle;telomere maintenance;chromatin organization;nucleosome assembly;DNA replication-dependent nucleosome assembly;DNA replication-independent nucleosome assembly;small GTPase mediated signal transduction;gene expression;DNA methylation on cytosine;CENP-A containing nucleosome assembly;histone H4-K20 demethylation;regulation of gene expression, epigenetic…	nuclear chromosome;nucleosome;extracellular region;nucleus;nucleoplasm;membrane;protein complex;extracellular exosome;	1.878	2.029	3.637	3.669	2.343	2.526	2.686	2.51	-0.066	0.028	-0.908	-0.724
Q2NL82	TSR1	Pre-rRNA-processing protein TSR1 homolog	ribosome assembly;	nucleolus;	2.37	2.55	3.516	3.73	2.214	2.309	2.666	2.545	-0.301	-0.269	-0.707	-0.526
Q92783	STAM	Signal transducing adapter molecule 1	intracellular protein transport;signal transduction;epidermal growth factor receptor signaling pathway;positive regulation of signal transduction;endosomal transport;negative regulation of epidermal growth factor receptor signaling pathway;membrane organization;positive regulation of exosomal secretion;regulation of extracellular exosome assembly;	cytosol;early endosome membrane;	3.941	4.374	2.974	3.401	3.08	3.12	3.714	3.763	-1.069	-1	-1.11	-0.752
Q9NSV4	DIAPH3	Protein diaphanous homolog 3	small GTPase mediated signal transduction;spermatogenesis;actin cytoskeleton organization;	nucleus;cytosol;	3.755	3.988	3.588	3.743	2.953	2.996	3.667	3.517	-0.721	-0.658	-0.948	-0.675
P54136	RARS	Arginine--tRNA ligase, cytoplasmic	tRNA aminoacylation for protein translation;arginyl-tRNA aminoacylation;gene expression;	nucleoplasm;cytoplasm;mitochondrion;cytosol;membrane;aminoacyl-tRNA synthetase multienzyme complex;extracellular exosome;	3.335	3.653	3.282	3.549	2.818	2.859	3.548	3.512	-0.789	-0.758	-1.145	-0.838
P13591	NCAM1	Neural cell adhesion molecule 1	cell adhesion;axon guidance;cytokine-mediated signaling pathway;extracellular matrix organization;interferon-gamma-mediated signaling pathway;	Golgi membrane;plasma membrane;external side of plasma membrane;cell surface;membrane;integral component of membrane;anchored component of membrane;extracellular exosome;	2.607	2.702	1.89	2.053	2.636	2.652	2.909	2.831	-0.323	-0.201	-0.474	-0.503
Q9NRA8	EIF4ENIF1	Eukaryotic translation initiation factor 4E transporter	protein transport;negative regulation of translation;stem cell maintenance;negative regulation of neuron differentiation;	cytoplasmic mRNA processing body;nucleus;cytoplasm;cytosol;membrane;PML body;nuclear speck;intracellular membrane-bounded organelle;	3.781	3.922	3.295	3.548	2.833	2.95	3.639	3.504	-0.906	-0.828	-1.299	-1.007
Q92974	ARHGEF2	Rho guanine nucleotide exchange factor 2	establishment of mitotic spindle orientation;cell morphogenesis;intracellular protein transport;actin filament organization;negative regulation of microtubule depolymerization;mitotic nuclear division;small GTPase mediated signal transduction;positive regulation of interleukin-6 production;positive regulation of tumor necrosis factor production;regulation of Rho protein signal transduction;regula…	cytoplasm;Golgi apparatus;spindle;cytosol;cytoskeleton;microtubule;bicellular tight junction;focal adhesion;cytoplasmic membrane-bounded vesicle;vesicle;ruffle membrane;neuronal cell body;dendritic shaft;protein complex;neuronal postsynaptic density;	3.266	3.387	3.149	3.244	2.749	2.761	3.21	3.141	-0.339	-0.235	-0.818	-0.698
P52701	MSH6	DNA mismatch repair protein Msh6	meiotic mismatch repair;DNA repair;mismatch repair;reciprocal meiotic recombination;determination of adult lifespan;intrinsic apoptotic signaling pathway in response to DNA damage;response to UV;viral process;somatic hypermutation of immunoglobulin genes;somatic recombination of immunoglobulin gene segments;isotype switching;negative regulation of DNA recombination;positive regulation of helicase…	nuclear chromosome;nuclear chromatin;nucleoplasm;cytoplasm;Golgi apparatus;plasma membrane;MutSalpha complex;intracellular membrane-bounded organelle;	2.953	3.153	3.204	3.432	2.704	2.737	3.203	3.108	-0.549	-0.443	-0.763	-0.566
E9PHV5	SSFA2	Sperm-specific antigen 2		nucleus;nucleoplasm;cytoplasm;plasma membrane;	3.74	3.918	3.386	3.547	2.671	2.83	3.435	3.322	-0.692	-0.634	-0.808	-0.598
P62995	TRA2B	Transformer-2 protein homolog beta	RNA splicing, via transesterification reactions;regulation of alternative mRNA splicing, via spliceosome;mRNA splicing, via spliceosome;cerebral cortex regionalization;positive regulation of mRNA splicing, via spliceosome;	nucleus;	2.519	2.55	0.887	0.937	2.064	2.212	2.386	2.141	0.047	0.248	-0.03	0.009
P31942	HNRNPH3	Heterogeneous nuclear ribonucleoprotein H3	mRNA splicing, via spliceosome;RNA processing;RNA splicing;epithelial cell differentiation;	nucleus;nucleoplasm;spliceosomal complex;	2.803	2.949	2.817	2.955	2.921	2.91	3.272	3.284	-0.386	-0.334	-0.809	-0.786
Q93009	USP7	Ubiquitin carboxyl-terminal hydrolase 7	transcription-coupled nucleotide-excision repair;multicellular organismal development;maintenance of DNA methylation;viral process;histone deubiquitination;protein deubiquitination;negative regulation of NF-kappaB transcription factor activity;proteasome-mediated ubiquitin-dependent protein catabolic process;regulation of sequence-specific DNA binding transcription factor activity;regulation of p…	nucleus;cytoplasm;cytosol;nuclear body;PML body;	3.07	3.215	3.206	3.526	2.669	2.724	3.329	3.151	-0.461	-0.43	-1.035	-0.691
P78347	GTF2I	General transcription factor II-I	regulation of transcription, DNA-templated;transcription from RNA polymerase II promoter;transcription initiation from RNA polymerase II promoter;signal transduction;transition between slow and fast fiber;negative regulation of angiogenesis;	nucleus;nucleoplasm;cytoplasm;membrane;cell projection;neuronal cell body;	2.847	3.037	3.042	3.21	2.595	2.668	3.28	3.195	-0.599	-0.5	-0.868	-0.731
Q16531	DDB1	DNA damage-binding protein 1	nucleotide-excision repair, DNA damage removal;DNA repair;nucleotide-excision repair;viral process;Wnt signaling pathway;translesion synthesis;histone H2A monoubiquitination;DNA damage response, detection of DNA damage;protein ubiquitination involved in ubiquitin-dependent protein catabolic process;negative regulation of apoptotic process;proteasome-mediated ubiquitin-dependent protein catabolic …	extracellular space;nucleus;nucleoplasm;cytoplasm;Cul4A-RING E3 ubiquitin ligase complex;Cul4B-RING E3 ubiquitin ligase complex;extracellular exosome;Cul4-RING E3 ubiquitin ligase complex;	3.068	3.252	2.971	3.247	2.428	2.446	3.199	3.067	-0.44	-0.305	-0.067	0.109
P40227	CCT6A	T-complex protein 1 subunit zeta	protein folding;binding of sperm to zona pellucida;cellular protein metabolic process;'de novo' posttranslational protein folding;toxin transport;	acrosomal vesicle;zona pellucida receptor complex;cytoplasm;cytosol;chaperonin-containing T-complex;microtubule;cell body;extracellular exosome;	2.829	3.003	3.068	3.252	2.553	2.635	3.259	3.153	-0.483	-0.41	-0.921	-0.731
Q8NI36	WDR36	WD repeat-containing protein 36	retina homeostasis;rRNA processing;visual perception;regulation of axon extension;response to stimulus;	nucleolus;small-subunit processome;Pwp2p-containing subcomplex of 90S preribosome;	2.836	2.988	3.606	3.72	2.54	2.53	2.941	2.959	-0.24	-0.207	-0.637	-0.348
Q9Y388	RBMX2	RNA-binding motif protein, X-linked 2			1.329	1.507	-0.804	-0.613	1.368	1.645	1.566	1.398	-0.101	0.091	-0.135	-0.111
P78316	NOP14	Nucleolar protein 14	endonucleolytic cleavage in ITS1 to separate SSU-rRNA from 5.8S rRNA and LSU-rRNA from tricistronic rRNA transcript (SSU-rRNA, 5.8S rRNA, LSU-rRNA);maturation of SSU-rRNA from tricistronic rRNA transcript (SSU-rRNA, 5.8S rRNA, LSU-rRNA);endonucleolytic cleavage to generate mature 5'-end of SSU-rRNA from (SSU-rRNA, 5.8S rRNA, LSU-rRNA);endonucleolytic cleavage in 5'-ETS of tricistronic rRNA transc…	nucleus;nucleolus;mitochondrion;membrane;90S preribosome;Noc4p-Nop14p complex;small-subunit processome;	2.492	2.694	3.723	3.929	2.439	2.507	2.736	2.686	-0.247	-0.265	-0.95	-0.74
Q5VTL8	PRPF38B	Pre-mRNA-splicing factor 38B	mRNA processing;RNA splicing;	precatalytic spliceosome;	2.237	2.374	2.443	2.585	2.149	2.24	2.665	2.572	-0.297	-0.213	-0.346	-0.224
P21127	CDK11B	Cyclin-dependent kinase 11B	regulation of cell growth;regulation of transcription, DNA-templated;protein phosphorylation;apoptotic process;mitotic nuclear division;cell proliferation;regulation of mRNA processing;regulation of cell cycle;	nucleus;cytoplasm;	2.92	3.12	1.925	2.137	2.654	2.6	3.032	2.895	-0.391	-0.296	-0.673	-0.45
Q92541	RTF1	RNA polymerase-associated protein RTF1 homolog	negative regulation of transcription from RNA polymerase II promoter;endodermal cell fate commitment;blastocyst growth;DNA-templated transcription, initiation;transcription elongation from RNA polymerase II promoter;Wnt signaling pathway;stem cell maintenance;positive regulation of transcription elongation from RNA polymerase II promoter;positive regulation of transcription from RNA polymerase II…	nucleolus;Cdc73/Paf1 complex;	2.302	2.37	2.45	2.603	2.652	2.652	2.827	2.715	-0.054	0.023	-0.437	-0.283
Q9Y450	HBS1L	HBS1-like protein	translation;translational elongation;signal transduction;	membrane;extracellular exosome;	3.176	3.475	3.252	3.569	2.607	2.705	3.552	3.413	-0.929	-0.821	-0.987	-0.782
F5GWT4	WNK1	Serine/threonine-protein kinase WNK1	protein phosphorylation;	cytoplasm;	3.501	3.395	2.938	3.013	2.45	2.59	3.472	3.227	-0.963	-0.769	-0.998	-1.034
Q15417	CNN3	Calponin-3	epithelial cell differentiation;actomyosin structure organization;negative regulation of ATPase activity;	cytoplasm;focal adhesion;postsynaptic density;actin cytoskeleton;neuronal cell body;dendritic spine;	3.93	3.926	3.099	3.212	3.061	3.213	3.833	3.793	-1.399	-1.297	-1.647	-1.556
F8WD26	LMO7	LIM domain only protein 7	regulation of signaling;regulation of cell adhesion;		3.145	3.169	2.818	2.826	2.413	2.797	3.814	3.739	-1.899	-1.646	-2.138	-2.156
Q9Y5J1	UTP18	U3 small nucleolar RNA-associated protein 18 homolog	rRNA processing;	nucleus;nucleolus;small-subunit processome;Pwp2p-containing subcomplex of 90S preribosome;	2.331	2.384	3.315	3.519	1.941	2.054	2.587	2.365	-0.119	-0.006	-0.797	-0.653
Q2M1P5	KIF7	Kinesin-like protein KIF7	microtubule-based movement;smoothened signaling pathway;metabolic process;ventricular system development;negative regulation of smoothened signaling pathway;positive regulation of smoothened signaling pathway;	kinesin complex;cilium;ciliary tip;	3.533	3.415	2.778	2.756	2.418	2.307	2.738	2.262	-0.26	-0.191	-0.375	-0.289
O75976	CPD	Carboxypeptidase D	proteolysis;	membrane;integral component of membrane;extracellular exosome;	2.596	2.608	1.919	2.058	2.238	2.527	2.941	2.792	-0.494	-0.537	-0.897	-0.685
P53618	COPB1	Coatomer subunit beta	intracellular protein transport;retrograde vesicle-mediated transport, Golgi to ER;intra-Golgi vesicle-mediated transport;viral process;COPI coating of Golgi vesicle;membrane organization;	Golgi membrane;cytoplasm;endoplasmic reticulum-Golgi intermediate compartment;Golgi apparatus;Golgi-associated vesicle;cytosol;plasma membrane;membrane;COPI vesicle coat;intracellular membrane-bounded organelle;	3.166	3.408	2.921	3.276	2.55	2.636	3.538	3.404	-0.765	-0.643	-0.863	-0.647
Q9UJU6	DBNL	Drebrin-like protein	immune system process;receptor-mediated endocytosis;apoptotic process;cellular component disassembly involved in execution phase of apoptosis;activation of JUN kinase activity;synapse assembly;programmed cell death;Rac protein signal transduction;neuron projection morphogenesis;podosome assembly;ruffle assembly;	Golgi membrane;ruffle;podosome;cytoplasm;cytosol;plasma membrane;cell cortex;postsynaptic density;lamellipodium;cell junction;dendrite;clathrin-coated vesicle membrane;extracellular exosome;	3.379	3.496	2.854	2.793	2.989	3.053	3.71	3.448	-1.156	-0.852	-1.419	-1.422
P62701	RPS4X	40S ribosomal protein S4, X isoform	nuclear-transcribed mRNA catabolic process, nonsense-mediated decay;translation;translational initiation;translational elongation;translational termination;SRP-dependent cotranslational protein targeting to membrane;multicellular organismal development;positive regulation of cell proliferation;gene expression;viral process;viral life cycle;viral transcription;cellular protein metabolic process;po…	cytosol;ribosome;polysome;focal adhesion;small ribosomal subunit;membrane;cytosolic small ribosomal subunit;ribonucleoprotein complex;cytoplasmic ribonucleoprotein granule;extracellular exosome;	2.599	2.643	3.665	3.826	2.651	2.657	2.877	2.637	-0.548	-0.45	-0.776	-0.749
P20073	ANXA7	Annexin A7	cellular calcium ion homeostasis;autophagy;hemostasis;cell proliferation;regulation of cell shape;response to salt stress;cellular water homeostasis;negative regulation of gene expression;response to organic cyclic compound;epithelial cell differentiation;social behavior;response to calcium ion;membrane fusion;	nucleus;nuclear envelope;endoplasmic reticulum membrane;cytosol;plasma membrane;membrane;extracellular exosome;chromaffin granule membrane;	4.397	4.545	2.781	2.947	3.165	3.25	3.894	3.782	-0.76	-0.629	-0.707	-0.587
Q08170	SRSF4	Serine/arginine-rich splicing factor 4	RNA splicing, via transesterification reactions;mRNA splicing, via spliceosome;hematopoietic progenitor cell differentiation;transcription from RNA polymerase II promoter;termination of RNA polymerase II transcription;mRNA processing;mRNA export from nucleus;RNA splicing;gene expression;mRNA 3'-end processing;negative regulation of mRNA splicing, via spliceosome;	nucleus;nucleoplasm;nuclear speck;	2.366	2.316	1.815	1.865	2.105	2.195	2.546	2.246	-0.014	0.147	-0.069	-0.106
P62750	RPL23A	60S ribosomal protein L23a	ribosomal large subunit assembly;nuclear-transcribed mRNA catabolic process, nonsense-mediated decay;translation;translational initiation;translational elongation;translational termination;SRP-dependent cotranslational protein targeting to membrane;cell proliferation;gene expression;viral process;viral life cycle;viral transcription;cellular protein metabolic process;	nucleus;nucleolus;cytoplasm;cytosol;cytosolic large ribosomal subunit;extracellular exosome;TORC2 complex;	-0.335	-0.316	4.236	4.216	0.363	0.343	0.295	0.159	-0.176	-0.153	-0.73	-0.679
Q8N1F7	NUP93	Nuclear pore complex protein Nup93	mitotic cell cycle;positive regulation of defense response to virus by host;carbohydrate metabolic process;protein import into nucleus;mitotic nuclear envelope disassembly;hexose transport;gene expression;regulation of glucose transport;glucose transport;viral process;protein sumoylation;poly(A)+ mRNA export from nucleus;viral life cycle;viral transcription;cytokine-mediated signaling pathway;cel…	nuclear envelope;nuclear pore;membrane;nuclear membrane;nuclear periphery;	3.264	3.473	2.864	3.087	2.733	2.74	3.521	3.331	-0.72	-0.69	-0.928	-0.744
P06748	NPM1	Nucleophosmin	DNA repair;nucleosome assembly;intracellular protein transport;nucleocytoplasmic transport;response to stress;centrosome cycle;signal transduction;cell aging;protein localization;negative regulation of cell proliferation;negative regulation of centrosome duplication;viral process;regulation of endodeoxyribonuclease activity;CENP-A containing nucleosome assembly;ribosome assembly;negative regulati…	nucleus;nucleoplasm;nucleolus;cytoplasm;centrosome;cytosol;focal adhesion;membrane;ribonucleoprotein complex;spindle pole centrosome;	2.476	2.692	3.953	4.169	2.793	2.862	3.105	3.084	-0.384	-0.358	-1.19	-0.873
Q92804	TAF15	TATA-binding protein-associated factor 2N	positive regulation of transcription, DNA-templated;	nucleus;nucleoplasm;cytoplasm;nucleolus;	3.807	3.71	2.275	2.22	2.776	2.881	3.261	3.114	-0.252	-0.102	-0.125	-0.294
P04637	TP53	Cellular tumor antigen p53	protein import into nucleus, translocation;negative regulation of transcription from RNA polymerase II promoter;DNA strand renaturation;in utero embryonic development;somitogenesis;release of cytochrome c from mitochondria;T cell proliferation involved in immune response;B cell lineage commitment;T cell lineage commitment;response to ischemia;base-excision repair;nucleotide-excision repair;double…	nuclear chromatin;nucleus;nucleoplasm;replication fork;nucleolus;cytoplasm;mitochondrion;mitochondrial matrix;endoplasmic reticulum;cytosol;nuclear matrix;PML body;protein complex;transcription factor TFIID complex;nuclear body;	3.274	3.267	2.877	2.661	2.45	2.558	3.135	2.846	-0.089	0.081	-0.401	-0.472
Q66GS9	CEP135	Centrosomal protein of 135 kDa	G2/M transition of mitotic cell cycle;mitotic cell cycle;organelle organization;centriole replication;centriole-centriole cohesion;	centrosome;centriole;cytosol;	3.444	3.651	3.287	3.447	2.791	2.898	3.464	3.342	-0.626	-0.528	-1.011	-0.812
O75665	OFD1	Oral-facial-digital syndrome 1 protein	G2/M transition of mitotic cell cycle;mitotic cell cycle;organelle organization;axoneme assembly;cilium morphogenesis;epithelial cilium movement involved in determination of left/right asymmetry;mitotic nuclear division;centriole replication;mitotic spindle assembly;	nucleus;centrosome;centriole;cytosol;cilium;microtubule cytoskeleton;membrane;centriolar satellite;ciliary basal body;	3.831	4.164	3.269	3.433	3.178	3.215	3.441	3.298	-0.344	-0.255	-0.566	-0.261
Q9Y3T9	NOC2L	Nucleolar complex protein 2 homolog	negative regulation of transcription from RNA polymerase II promoter;negative regulation of B cell apoptotic process;transcription, DNA-templated;apoptotic process;chromatin assembly;nucleolus to nucleoplasm transport;cellular response to UV;negative regulation of histone acetylation;negative regulation of intrinsic apoptotic signaling pathway;	nucleus;nucleoplasm;nucleolus;	2.779	2.979	3.661	3.898	2.681	2.8	2.922	2.788	-0.346	-0.261	-0.907	-0.621
Q06830	PRDX1	Peroxiredoxin-1	response to reactive oxygen species;skeletal system development;retina homeostasis;transcription initiation from RNA polymerase II promoter;cell proliferation;gene expression;removal of superoxide radicals;regulation of stress-activated MAPK cascade;erythrocyte homeostasis;natural killer cell mediated cytotoxicity;regulation of NF-kappaB import into nucleus;hydrogen peroxide catabolic process;oxi…	extracellular space;nucleus;cytoplasm;mitochondrion;cytosol;melanosome;myelin sheath;extracellular exosome;	3.53	3.721	2.859	3.072	2.983	3.059	3.764	3.717	-1.153	-1.068	-1.502	-1.289
Q99575	POP1	Ribonucleases P/MRP protein subunit POP1	tRNA 5'-leader removal;tRNA processing;tRNA catabolic process;RNA phosphodiester bond hydrolysis;RNA phosphodiester bond hydrolysis, endonucleolytic;	ribonuclease MRP complex;extracellular space;nucleolar ribonuclease P complex;	2.782	2.889	3.778	3.804	2.34	2.355	2.648	2.476	-0.062	-0.173	-0.384	-0.367
Q9BV73	CEP250	Centrosome-associated protein CEP250	G2/M transition of mitotic cell cycle;mitotic cell cycle;organelle organization;protein localization;centriole-centriole cohesion;regulation of centriole-centriole cohesion;protein localization to organelle;nonmotile primary cilium assembly;	centrosome;centriole;microtubule organizing center;cytosol;cilium;spindle pole centrosome;protein complex;perinuclear region of cytoplasm;extracellular exosome;centriole;	3.289	3.521	2.938	3.152	2.505	2.637	3.013	2.739	-0.288	-0.173	-0.445	-0.366
O60524	NEMF	Nuclear export mediator factor NEMF	nuclear export;	nucleus;	2.961	3.072	3.796	4.019	2.748	2.839	3.151	3.001	-0.262	-0.176	-0.658	-0.649
Q96ST2	IWS1	Protein IWS1 homolog	transcription, DNA-templated;regulation of transcription, DNA-templated;mRNA processing;RNA splicing;regulation of mRNA export from nucleus;regulation of mRNA processing;mRNA transport;regulation of histone H4 acetylation;regulation of histone H3-K36 trimethylation;	nucleus;nucleoplasm;cytoplasm;	2.557	2.758	2.774	2.81	2.316	2.523	2.812	2.637	-0.16	-0.123	-0.511	-0.353
Q8TD19	NEK9	Serine/threonine-protein kinase Nek9	mitotic cell cycle;protein phosphorylation;mitotic nuclear division;mitotic nuclear envelope disassembly;cell division;	nucleus;cytosol;	3.974	4.247	3.575	3.702	2.878	2.939	3.718	3.635	-0.908	-0.853	-0.795	-0.622
P43246	MSH2	DNA mismatch repair protein Msh2	meiotic mismatch repair;in utero embryonic development;oxidative phosphorylation;DNA repair;mismatch repair;postreplication repair;double-strand break repair;meiotic gene conversion;cell cycle arrest;reciprocal meiotic recombination;germ cell development;determination of adult lifespan;male gonad development;response to X-ray;response to UV-B;somatic hypermutation of immunoglobulin genes;somatic …	nuclear chromosome;nucleoplasm;membrane;MutSalpha complex;MutSbeta complex;	3.042	3.297	3.193	3.329	2.909	2.883	3.424	3.403	-0.489	-0.46	-0.82	-0.588
Q9UGP4	LIMD1	LIM domain-containing protein 1	response to hypoxia;osteoblast development;transcription, DNA-templated;regulation of transcription, DNA-templated;cytoskeleton organization;signal transduction;multicellular organismal development;regulation of cell shape;phosphorylation;cell migration;cytoplasmic mRNA processing body assembly;gene silencing by miRNA;negative regulation of hippo signaling;negative regulation of osteoblast differ…	cytoplasmic mRNA processing body;nucleus;cytoplasm;adherens junction;focal adhesion;RISC complex;	3.808	3.992	3.428	3.401	2.951	2.97	3.892	3.521	-0.879	-0.631	-1.043	-0.952
Q9NWH9	SLTM	SAFB-like transcription modulator	transcription, DNA-templated;regulation of transcription, DNA-templated;apoptotic process;	nucleoplasm;	2.26	2.184	1.447	1.408	2.293	2.405	2.609	2.491	-0.371	-0.202	-0.885	-0.913
P00558	PGK1	Phosphoglycerate kinase 1	carbohydrate metabolic process;glucose metabolic process;gluconeogenesis;phosphorylation;epithelial cell differentiation;small molecule metabolic process;canonical glycolysis;	cytosol;membrane;membrane raft;extracellular exosome;	2.336	2.61	3.217	3.482	2.652	2.71	2.992	2.885	-0.232	-0.202	-0.912	-0.637
Q15942	ZYX	Zyxin	cell adhesion;cell-matrix adhesion;signal transduction;transforming growth factor beta receptor signaling pathway;integrin-mediated signaling pathway;cell-cell signaling;viral process;stress fiber assembly;regulation of inflammatory response;	stress fiber;nucleus;cytoplasm;plasma membrane;integral component of plasma membrane;cell-cell adherens junction;focal adhesion;	3.578	3.677	2.918	3.043	2.6	2.752	3.6	3.479	-1.218	-1.089	-1.482	-1.375
Q92542	NCSTN	Nicastrin	myeloid cell homeostasis;proteolysis;membrane protein ectodomain proteolysis;Notch signaling pathway;Notch receptor processing;axon guidance;protein processing;extracellular matrix disassembly;extracellular matrix organization;membrane protein intracellular domain proteolysis;T cell proliferation;amyloid precursor protein catabolic process;positive regulation of apoptotic process;positive regulat…	lysosomal membrane;endoplasmic reticulum;Golgi apparatus;plasma membrane;integral component of plasma membrane;focal adhesion;membrane;integral component of membrane;melanosome;extracellular exosome;	3.349	3.647	3.035	3.3	3.121	3.06	3.345	3.323	-0.118	-0.084	-0.296	-0.073
Q9BXP5	SRRT	Serrate RNA effector molecule homolog	transcription, DNA-templated;regulation of transcription, DNA-templated;cell proliferation;primary miRNA processing;response to arsenic-containing substance;positive regulation of neurogenesis;neuronal stem cell maintenance;	nucleus;nucleoplasm;cytoplasm;	2.762	2.929	2.385	2.663	2.474	2.638	3.092	2.939	-0.79	-0.722	-1.551	-1.303
Q14676	MDC1	Mediator of DNA damage checkpoint protein 1	double-strand break repair via homologous recombination;DNA repair;double-strand break repair;protein sumoylation;intra-S DNA damage checkpoint;post-translational protein modification;cellular protein metabolic process;	nucleus;nucleoplasm;chromosome;focal adhesion;	2.54	2.8	2.878	2.969	2.29	2.415	3.045	2.74	-0.305	-0.199	-0.905	-0.628
P25205	MCM3	DNA replication licensing factor MCM3	G1/S transition of mitotic cell cycle;mitotic cell cycle;DNA replication;DNA replication initiation;DNA strand elongation involved in DNA replication;DNA duplex unwinding;	nucleus;nucleoplasm;alpha DNA polymerase:primase complex;centrosome;membrane;MCM complex;intracellular membrane-bounded organelle;perinuclear region of cytoplasm;	2.624	2.793	2.463	2.619	2.177	2.305	2.877	2.628	-0.153	-0.116	-0.465	-0.301
Q9NUL3	STAU2	Double-stranded RNA-binding protein Staufen homolog 2	transport;	nucleolus;endoplasmic reticulum;microtubule;membrane;	3.456	3.72	3.383	3.641	2.935	3.09	3.484	3.417	-0.862	-0.808	-1.182	-1.062
Q96SB4	SRPK1	SRSF protein kinase 1	mRNA processing;protein phosphorylation;chromosome segregation;RNA splicing;viral process;sperm chromatin condensation;intracellular signal transduction;positive regulation of viral genome replication;negative regulation of viral genome replication;innate immune response;regulation of mRNA splicing, via spliceosome;regulation of mRNA processing;	nucleus;nucleoplasm;cytoplasm;endoplasmic reticulum;plasma membrane;nuclear matrix;	2.983	3.139	3.838	3.926	2.467	2.525	3.087	2.882	-0.475	-0.427	-0.867	-0.683
Q9UQE7	SMC3	Structural maintenance of chromosomes protein 3	mitotic cell cycle;regulation of DNA replication;DNA repair;mitotic spindle organization;sister chromatid cohesion;mitotic sister chromatid cohesion;mitotic nuclear division;meiotic nuclear division;signal transduction;protein sumoylation;stem cell maintenance;negative regulation of DNA endoreduplication;post-translational protein modification;cellular protein metabolic process;cell division;	chromosome, centromeric region;chromatin;lateral element;spindle pole;basement membrane;nucleus;nucleoplasm;chromosome;cytoplasm;cytosol;cohesin complex;cohesin core heterodimer;nuclear matrix;meiotic cohesin complex;nuclear meiotic cohesin complex;	2.684	2.776	2.985	3.175	2.385	2.628	3.093	2.921	-0.455	-0.286	-1.081	-0.844
Q8WUM0	NUP133	Nuclear pore complex protein Nup133	mitotic cell cycle;carbohydrate metabolic process;mRNA export from nucleus;nuclear pore organization;mitotic nuclear envelope disassembly;small GTPase mediated signal transduction;hexose transport;gene expression;regulation of glucose transport;protein transport;glucose transport;viral process;protein sumoylation;viral life cycle;viral transcription;cytokine-mediated signaling pathway;cellular re…	nuclear envelope;nuclear pore;cytosol;membrane;nuclear pore outer ring;nuclear membrane;condensed chromosome kinetochore;condensed chromosome outer kinetochore;	3.441	3.705	3.126	3.401	2.785	2.822	3.503	3.431	-0.643	-0.621	-0.898	-0.588
Q9UPY3	DICER1	Endoribonuclease Dicer	negative regulation of transcription from RNA polymerase II promoter;angiogenesis;apoptotic DNA fragmentation;post-embryonic development;zygote asymmetric cell division;gene expression;negative regulation of Schwann cell proliferation;positive regulation of gene expression;regulation of muscle cell apoptotic process;positive regulation of Schwann cell differentiation;myoblast differentiation invo…	nucleus;cytoplasm;endoplasmic reticulum-Golgi intermediate compartment;cytosol;axon;dendrite;growth cone;ARC complex;micro-ribonucleoprotein complex;RISC-loading complex;RISC complex;	3.249	3.183	3.032	2.925	2.356	2.412	3.079	2.988	-0.633	-0.52	-0.64	-0.512
Q9NZJ4	SACS	Sacsin	protein folding;negative regulation of inclusion body assembly;	nucleus;cytoplasm;mitochondrion;axon;dendrite;cell body fiber;	3.261	3.546	3.202	3.48	2.764	2.837	3.345	3.264	-0.583	-0.509	-0.623	-0.305
P33991	MCM4	DNA replication licensing factor MCM4	G1/S transition of mitotic cell cycle;mitotic cell cycle;DNA replication;DNA unwinding involved in DNA replication;DNA replication initiation;DNA strand elongation involved in DNA replication;	nucleus;nucleoplasm;membrane;MCM complex;	2.876	3.046	3.143	3.362	2.471	2.576	3.017	2.962	-0.28	-0.21	-0.646	-0.561
Q9UBU9	NXF1	Nuclear RNA export factor 1	mRNA export from nucleus;gene expression;viral process;	nucleus;nucleoplasm;cytosol;nuclear speck;transcription export complex;	2.768	2.992	3.388	3.636	2.625	2.639	3.024	3.053	-0.449	-0.433	-1.088	-0.801
Q02790	FKBP4	Peptidyl-prolyl cis-trans isomerase FKBP4	protein peptidyl-prolyl isomerization;protein folding;steroid hormone receptor complex assembly;copper ion transport;embryo implantation;negative regulation of neuron projection development;androgen receptor signaling pathway;prostate gland development;negative regulation of microtubule polymerization or depolymerization;negative regulation of microtubule polymerization;protein complex localizati…	nucleoplasm;cytoplasm;mitochondrion;endoplasmic reticulum membrane;cytosol;microtubule;neuronal cell body;axonal growth cone;perinuclear region of cytoplasm;extracellular exosome;	3.075	3.125	2.714	2.765	2.622	2.829	3.451	3.289	-0.793	-0.66	-1.084	-1.069
O60264	SMARCA5	SWI/SNF-related matrix-associated actin-dependent regulator of chromatin subfamily A member 5	chromatin silencing at rDNA;double-strand break repair;nucleosome assembly;chromatin remodeling;DNA-templated transcription, initiation;regulation of transcription from RNA polymerase II promoter;gene expression;nucleosome positioning;CENP-A containing nucleosome assembly;regulation of gene expression, epigenetic;ATP-dependent chromatin remodeling;negative regulation of gene expression, epigeneti…	condensed chromosome;nucleus;nucleoplasm;chromatin silencing complex;nucleolus;NURF complex;RSF complex;nuclear replication fork;	2.743	2.873	3.294	3.549	2.519	2.572	3.092	2.976	-0.38	-0.325	-0.842	-0.644
Q99816	TSG101	Tumor susceptibility gene 101 protein	regulation of cell growth;protein monoubiquitination;cell cycle arrest;negative regulation of cell proliferation;endosome to lysosome transport;protein transport;viral process;endosomal transport;viral life cycle;virion assembly;viral protein processing;keratinocyte differentiation;ubiquitin-dependent protein catabolic process via the multivesicular body sorting pathway;regulation of MAP kinase a…	ESCRT I complex;nucleolus;cytoplasm;endosome;early endosome;late endosome;multivesicular body;plasma membrane;endosome membrane;late endosome membrane;extracellular exosome;	4.284	4.396	2.971	3.203	3.277	3.27	3.921	3.692	-0.961	-0.88	-1.038	-0.849
O43347	MSI1	RNA-binding protein Musashi homolog 1	nervous system development;	nucleus;cytoplasm;polysome;	3.455	3.692	3.284	3.585	2.749	2.978	3.745	3.707	-1.303	-1.225	-1.593	-1.337
P08621	SNRNP70	U1 small nuclear ribonucleoprotein 70 kDa	mRNA splicing, via spliceosome;mRNA processing;RNA splicing;gene expression;regulation of RNA splicing;positive regulation of mRNA splicing, via spliceosome;	nucleus;nucleoplasm;spliceosomal complex;U1 snRNP;nuclear speck;	2.235	2.281	2.858	2.874	2.139	2.251	2.927	2.676	-0.433	-0.439	-0.922	-0.898
O94826	TOMM70	Mitochondrial import receptor subunit TOM70	protein targeting to mitochondrion;cellular protein metabolic process;protein transmembrane transport;	mitochondrion;mitochondrial outer membrane translocase complex;membrane;integral component of membrane;extracellular exosome;	3.836	3.982	2.972	3.25	3.151	3.186	2.729	2.587	1.061	1.107	0.805	0.966
O75683	SURF6	Surfeit locus protein 6	ribosome biogenesis;	granular component;nucleoplasm;nucleolus;	0.349	0.479	4.53	4.618	0.52	0.465	1	0.911	-0.044	-0.014	-0.397	-0.368
P31689	DNAJA1	DnaJ homolog subfamily A member 1	protein folding;response to unfolded protein;spermatogenesis;response to heat;sperm motility;androgen receptor signaling pathway;negative regulation of protein ubiquitination;protein refolding;DNA damage response, detection of DNA damage;positive regulation of apoptotic process;negative regulation of apoptotic process;negative regulation of JUN kinase activity;regulation of protein transport;prot…	nucleus;mitochondrion;cytosol;membrane;perinuclear region of cytoplasm;extracellular exosome;cytoplasmic side of endoplasmic reticulum membrane;ubiquitin ligase complex;	3.539	3.879	3.011	3.221	3.064	3.197	3.641	3.561	-0.87	-0.807	-1.069	-0.916
P55786	NPEPPS	Puromycin-sensitive aminopeptidase	protein polyubiquitination;antigen processing and presentation of peptide antigen via MHC class I;proteolysis;peptide catabolic process;cellular response to hypoxia;positive regulation of protein targeting to mitochondrion;	nucleus;cytosol;extracellular exosome;	2.936	3.177	3.043	3.344	2.531	2.667	3.395	3.262	-0.57	-0.493	-0.868	-0.564
Q92598	HSPH1	Heat shock protein 105 kDa	receptor-mediated endocytosis;response to unfolded protein;cellular response to heat;positive regulation of MHC class I biosynthetic process;positive regulation of transcription from RNA polymerase II promoter;chaperone mediated protein folding requiring cofactor;positive regulation of NK T cell activation;positive regulation of protein tyrosine kinase activity;regulation of cellular response to …	extracellular region;nucleoplasm;cytoplasm;cytosol;microtubule;extracellular exosome;endocytic vesicle lumen;	3.206	3.417	2.926	3.149	2.612	2.686	3.469	3.394	-0.856	-0.791	-1.113	-0.838
Q13136	PPFIA1	Liprin-alpha-1	cell-matrix adhesion;signal transduction;synaptic transmission;neurotransmitter secretion;glutamate secretion;negative regulation of stress fiber assembly;negative regulation of establishment of protein localization to plasma membrane;	cytoplasm;cytosol;focal adhesion;presynaptic active zone;	3.229	3.287	3.051	3.16	2.534	2.68	3.366	3.31	-0.947	-0.812	-1.387	-1.221
Q9UPU5	USP24	Ubiquitin carboxyl-terminal hydrolase 24	protein deubiquitination;proteasome-mediated ubiquitin-dependent protein catabolic process;regulation of proteasomal protein catabolic process;		3.569	3.66	2.664	2.937	2.792	2.918	3.646	3.559	-0.924	-0.807	-0.905	-0.576
Q96MU7	YTHDC1	YTH domain-containing protein 1	mRNA splice site selection;	nucleus;nuclear body;	2.653	2.731	1.857	1.954	2.321	2.529	2.988	2.65	-0.13	0.04	-0.348	-0.445
S4R3H4	ACIN1	Apoptotic chromatin condensation inducer in the nucleus		nucleoplasm;cytoplasm;plasma membrane;	2.621	2.707	2.39	2.772	2.375	2.424	2.818	2.712	-0.489	-0.472	-1.031	-1.001
Q15691	MAPRE1	Microtubule-associated protein RP/EB family member 1	G2/M transition of mitotic cell cycle;mitotic cell cycle;organelle organization;mitotic nuclear division;small GTPase mediated signal transduction;cell proliferation;negative regulation of microtubule polymerization;protein localization to microtubule;cell division;positive regulation of microtubule plus-end binding;	cytoplasm;Golgi apparatus;centrosome;cytosol;microtubule;cytoplasmic microtubule;cortical microtubule cytoskeleton;cell projection membrane;microtubule plus-end;spindle;	3.706	3.884	3.362	3.483	3.238	3.34	3.764	3.675	-0.777	-0.732	-1.235	-1.063
Q7Z4V5	HDGFL2	Hepatoma-derived growth factor-related protein 2	transcription, DNA-templated;positive regulation of cell growth;	nucleus;nucleoplasm;mitochondrion;	2.568	2.678	1.845	1.962	2.501	2.591	2.743	2.493	-0.159	-0.091	-0.676	-0.566
Q8NCA5	FAM98A	Protein FAM98A		tRNA-splicing ligase complex;	3.903	3.849	3.336	3.476	2.986	3.217	3.603	3.546	-0.866	-0.748	-1.074	-0.947
P12277	CKB	Creatine kinase B-type	creatine metabolic process;phosphorylation;substantia nigra development;cellular chloride ion homeostasis;cellular nitrogen compound metabolic process;small molecule metabolic process;	extracellular space;mitochondrion;cytosol;myelin sheath;extracellular exosome;	2.772	2.951	2.596	2.612	2.427	2.564	3.304	3.132	-0.727	-0.673	-1.25	-0.959
P29401	TKT	Transketolase	carbohydrate metabolic process;xylulose biosynthetic process;pentose-phosphate shunt;energy reserve metabolic process;pentose-phosphate shunt, non-oxidative branch;regulation of growth;small molecule metabolic process;glyceraldehyde-3-phosphate biosynthetic process;	nucleus;nucleoplasm;peroxisome;cytosol;vesicle;myelin sheath;extracellular exosome;	2.779	2.973	3.119	3.301	2.539	2.482	3.024	2.916	-0.345	-0.279	-0.549	-0.334
Q9UGP8	SEC63	Translocation protein SEC63 homolog	liver development;protein targeting to membrane;SRP-dependent cotranslational protein targeting to membrane;posttranslational protein targeting to membrane;nitrogen compound metabolic process;multicellular organismal aging;endoplasmic reticulum unfolded protein response;posttranslational protein targeting to membrane, translocation;IRE1-mediated unfolded protein response;cellular protein metaboli…	endoplasmic reticulum;endoplasmic reticulum membrane;cytosol;membrane;integral component of membrane;	2.885	3.109	3.919	4.11	2.608	2.634	3.054	2.985	-0.477	-0.409	-0.956	-0.774
Q5BKZ1	ZNF326	DBIRD complex subunit ZNF326	transcription, DNA-templated;mRNA processing;RNA splicing;regulation of DNA-templated transcription, elongation;	nucleoplasm;nuclear matrix;intracellular membrane-bounded organelle;DBIRD complex;spliceosomal complex;	2.666	2.813	3.564	3.485	2.426	2.492	2.957	2.816	-0.189	-0.085	-0.782	-0.719
Q9NVI7	ATAD3A	ATPase family AAA domain-containing protein 3A	cell growth;negative regulation of apoptotic process;	mitochondrion;mitochondrial inner membrane;integral component of membrane;mitochondrial nucleoid;	1.824	1.937	2.16	2.303	1.622	1.604	2.609	2.618	0.096	0.145	0.049	0.297
P13861	PRKAR2A	cAMP-dependent protein kinase type II-alpha regulatory subunit	renal water homeostasis;energy reserve metabolic process;water transport;signal transduction;epidermal growth factor receptor signaling pathway;activation of phospholipase C activity;blood coagulation;fibroblast growth factor receptor signaling pathway;activation of protein kinase A activity;intracellular signal transduction;small molecule metabolic process;innate immune response;neurotrophin TRK…	cytoplasm;centrosome;cytosol;plasma membrane;focal adhesion;cAMP-dependent protein kinase complex;membrane;AMP-activated protein kinase complex;plasma membrane raft;extracellular exosome;ciliary base;	3.629	3.899	3.044	3.229	3.065	3.138	3.335	3.266	-0.002	0.03	-0.372	-0.183
P05556	ITGB1	Integrin beta-1	G1/S transition of mitotic cell cycle;in utero embryonic development;cell fate specification;cell migration involved in sprouting angiogenesis;cellular defense response;homophilic cell adhesion via plasma membrane adhesion molecules;leukocyte cell-cell adhesion;cell-matrix adhesion;calcium-independent cell-matrix adhesion;integrin-mediated signaling pathway;small GTPase mediated signal transducti…	ruffle;cytoplasm;plasma membrane;focal adhesion;integrin complex;external side of plasma membrane;cell surface;intercalated disc;membrane;lamellipodium;filopodium;neuromuscular junction;cleavage furrow;ruffle membrane;integrin alpha1-beta1 complex;integrin alpha2-beta1 complex;integrin alpha3-beta1 complex;integrin alpha7-beta1 complex;integrin alpha8-beta1 complex;integrin alpha10-beta1 complex;…	2.91	3.231	2.709	2.941	2.738	2.763	3.177	3.093	-0.401	-0.291	-0.656	-0.445
P62917	RPL8	60S ribosomal protein L8	nuclear-transcribed mRNA catabolic process, nonsense-mediated decay;cytoplasmic translation;translation;translational initiation;translational elongation;translational termination;SRP-dependent cotranslational protein targeting to membrane;gene expression;viral process;viral life cycle;viral transcription;cellular protein metabolic process;	nucleolus;cytoplasm;cytosol;focal adhesion;membrane;cytosolic large ribosomal subunit;	1.417	1.34	3.541	3.46	1.698	1.738	1.824	1.784	-0.007	0.056	-0.222	-0.357
Q9UNY4	TTF2	Transcription termination factor 2	DNA-templated transcription, termination;regulation of transcription, DNA-templated;termination of RNA polymerase II transcription;mRNA processing;RNA splicing;	spliceosomal complex;cytoplasm;transcription elongation factor complex;	3.394	3.462	3.295	3.474	2.793	2.817	3.487	3.306	-0.496	-0.422	-0.768	-0.62
Q8TEX9	IPO4	Importin-4	DNA replication-dependent nucleosome assembly;DNA replication-independent nucleosome assembly;intracellular protein transport;protein transport;	nuclear chromatin;cytoplasm;membrane;protein complex;nuclear pore;	3.123	3.375	2.785	3.025	2.687	2.686	3.308	3.313	-0.841	-0.745	-1.096	-0.683
Q9BYG3	NIFK	MKI67 FHA domain-interacting nucleolar phosphoprotein	protein complex assembly;rRNA transcription;negative regulation of phosphatase activity;rRNA metabolic process;	condensed nuclear chromosome;nucleus;nucleoplasm;nucleolus;cytoplasm;	2.31	2.594	4.253	4.444	2.238	2.318	2.576	2.495	-0.28	-0.215	-0.872	-0.607
Q13315	ATM	Serine-protein kinase ATM	telomere maintenance;double-strand break repair via homologous recombination;response to hypoxia;somitogenesis;pre-B cell allelic exclusion;DNA repair;double-strand break repair;protein phosphorylation;cellular response to DNA damage stimulus;DNA damage induced protein phosphorylation;DNA damage response, signal transduction by p53 class mediator resulting in cell cycle arrest;cell cycle arrest;m…	nucleoplasm;spindle;cytoplasmic membrane-bounded vesicle;chromosome, telomeric region;	3.435	3.674	3.535	3.653	2.702	2.783	3.332	3.231	-0.424	-0.404	-0.527	-0.231
Q96QK1	VPS35	Vacuolar protein sorting-associated protein 35	intracellular protein transport;retrograde transport, endosome to Golgi;transcytosis;negative regulation of late endosome to lysosome transport;retrograde transport, endosome to plasma membrane;	lysosomal membrane;endosome;early endosome;late endosome;cytosol;retromer complex;extracellular exosome;tubular endosome;neuronal postsynaptic density;	2.927	3.337	2.854	3.195	2.621	2.74	3.601	3.416	-0.931	-0.774	-1.381	-1.008
O00139-2	KIF2A	Isoform 2 of Kinesin-like protein KIF2A	mitotic cell cycle;microtubule-based movement;microtubule depolymerization;mitotic spindle organization;small GTPase mediated signal transduction;nervous system development;blood coagulation;metabolic process;antigen processing and presentation of exogenous peptide antigen via MHC class II;cell differentiation;cell division;mitotic spindle assembly;	centrosome;cytosol;kinesin complex;membrane;sperm principal piece;spindle pole;spindle microtubule;	3.018	3.044	3.205	3.222	2.767	2.738	3.168	2.969	-0.476	-0.393	-0.902	-0.819
Q9H501	ESF1	ESF1 homolog	transcription, DNA-templated;regulation of transcription, DNA-templated;	extracellular space;nucleoplasm;nucleolus;	2.764	3.006	3.275	3.503	2.783	2.765	3.084	3.046	-0.443	-0.413	-1.328	-1.043
Q7L0Y3	TRMT10C	tRNA methyltransferase 10 homolog C	mitochondrial RNA 5'-end processing;tRNA processing;methylation;	nucleoplasm;mitochondrion;mitochondrial nucleoid;	2.539	2.754	3.501	3.758	2.678	2.797	2.866	2.773	-0.3	-0.269	-1.039	-0.753
Q8TCU4	ALMS1	Alstrom syndrome protein 1	G2/M transition of mitotic cell cycle;mitotic cell cycle;organelle organization;endosomal transport;regulation of stress fiber assembly;	spindle pole;nucleus;nucleoplasm;cytoplasm;centrosome;cytosol;cilium;centriole;	3.445	3.375	2.993	3.078	2.457	2.435	2.83	2.513	-0.347	-0.256	-0.278	-0.233
P05141	SLC25A5	ADP/ATP translocase 2	energy reserve metabolic process;transport;chromosome segregation;positive regulation of cell proliferation;adenine transport;viral process;small molecule metabolic process;regulation of insulin secretion;transmembrane transport;negative regulation of mitochondrial outer membrane permeabilization involved in apoptotic signaling pathway;	nucleus;mitochondrion;mitochondrial inner membrane;integral component of plasma membrane;membrane;mitochondrial nucleoid;myelin sheath;extracellular exosome;MMXD complex;	2.704	2.855	2.759	3.008	2.572	2.614	2.977	2.841	0.161	0.244	0.242	0.45
Q12905	ILF2	Interleukin enhancer-binding factor 2	transcription, DNA-templated;immune response;positive regulation of transcription, DNA-templated;	nucleus;nucleoplasm;nucleolus;cytoplasm;membrane;ribonucleoprotein complex;	2.709	2.941	4.095	4.241	2.548	2.588	3.003	2.908	-0.417	-0.342	-1.006	-0.709
Q16629	SRSF7	Serine/arginine-rich splicing factor 7	mRNA splicing, via spliceosome;transcription from RNA polymerase II promoter;termination of RNA polymerase II transcription;mRNA processing;mRNA export from nucleus;RNA splicing;gene expression;mRNA 3'-end processing;negative regulation of mRNA splicing, via spliceosome;	nucleus;nucleoplasm;cytoplasm;extracellular exosome;	2.478	2.681	1.982	2.199	2.209	2.321	2.91	2.824	-0.739	-0.67	-1.31	-1.156
Q8N3U4	STAG2	Cohesin subunit SA-2	mitotic cell cycle;transcription from RNA polymerase II promoter;sister chromatid cohesion;mitotic nuclear division;protein sumoylation;stem cell maintenance;negative regulation of DNA endoreduplication;post-translational protein modification;cellular protein metabolic process;positive regulation of transcription from RNA polymerase II promoter;cell division;meiotic cell cycle;	chromosome, centromeric region;chromatin;nucleus;nucleoplasm;chromosome;nucleolus;cytosol;plasma membrane;actin cytoskeleton;membrane;intermediate filament cytoskeleton;	2.659	3.107	3.683	3.846	2.594	2.67	3.102	2.99	-0.401	-0.32	-0.815	-0.597
Q9H0S4	DDX47	Probable ATP-dependent RNA helicase DDX47	rRNA processing;mRNA processing;RNA splicing;extrinsic apoptotic signaling pathway via death domain receptors;RNA secondary structure unwinding;	nucleolus;membrane;	2.942	3.21	3.648	3.756	2.659	2.748	3.125	3.087	-0.529	-0.418	-1.031	-0.767
Q96F86	EDC3	Enhancer of mRNA-decapping protein 3	nuclear-transcribed mRNA catabolic process, deadenylation-dependent decay;gene expression;exonucleolytic nuclear-transcribed mRNA catabolic process involved in deadenylation-dependent decay;	cytoplasmic mRNA processing body;cytosol;membrane;	3.613	3.626	3.082	3.193	2.939	2.953	3.786	3.581	-0.997	-0.931	-1.305	-1.071
Q99569	PKP4	Plakophilin-4	cell-cell junction assembly;cell-cell signaling;single organismal cell-cell adhesion;regulation of cell adhesion;positive regulation of cytokinesis;positive regulation of GTPase activity;	spindle pole;cytoplasm;cytoskeleton;plasma membrane;cell-cell junction;cytoplasmic side of plasma membrane;postsynaptic density;desmosome;midbody;perinuclear region of cytoplasm;spindle midzone;mitotic spindle;midbody;cell-cell contact zone;	3.115	3.307	2.618	2.679	2.662	2.765	3.326	3.289	-1.196	-1.126	-1.393	-1.346
Q86Y56	DNAAF5	Dynein assembly factor 5, axonemal	cilium movement;outer dynein arm assembly;inner dynein arm assembly;	cytoplasm;motile cilium;	3.638	3.713	3.395	3.458	2.952	3.02	3.719	3.598	-0.999	-0.975	-1.193	-0.878
P52292	KPNA2	Importin subunit alpha-1	regulation of DNA recombination;DNA metabolic process;NLS-bearing protein import into nucleus;viral process;cytokine-mediated signaling pathway;	nucleoplasm;cytoplasm;cytosol;membrane;	3.736	3.883	3.293	3.601	2.655	2.884	3.625	3.684	-1.24	-1.091	-1.395	-1.136
Q13206	DDX10	Probable ATP-dependent RNA helicase DDX10	RNA secondary structure unwinding;		2.233	2.355	3.119	3.05	1.873	1.854	2.267	2.311	-0.21	-0.107	-0.748	-0.653
A0A087X2D8	SPAG9	C-Jun-amino-terminal kinase-interacting protein 4	activation of JUN kinase activity;	intracellular;	3.207	3.307	2.947	3.048	2.699	2.842	3.38	3.274	-0.854	-0.759	-1.017	-1.003
Q9HCG8	CWC22	Pre-mRNA-splicing factor CWC22 homolog	mRNA splicing, via spliceosome;regulation of mRNA splicing, via spliceosome;	nucleoplasm;spliceosomal complex;cytoplasm;Golgi apparatus;nuclear speck;catalytic step 2 spliceosome;	2.602	2.671	2.387	2.451	2.567	2.691	2.746	2.62	-0.152	-0.098	-0.435	-0.446
Q86US8	SMG6	Telomerase-binding protein EST1A	nuclear-transcribed mRNA catabolic process, nonsense-mediated decay;telomere maintenance;mRNA export from nucleus;gene expression;regulation of dephosphorylation;RNA phosphodiester bond hydrolysis, endonucleolytic;	chromosome, telomeric region;nucleus;telomerase holoenzyme complex;nucleolus;cytoplasm;cytosol;exon-exon junction complex;	3.567	3.624	3.209	3.456	2.713	2.82	3.474	3.319	-0.664	-0.528	-0.84	-0.703
Q9BWF3	RBM4	RNA-binding protein 4	regulation of alternative mRNA splicing, via spliceosome;cap-independent translational initiation;IRES-dependent translational initiation;RNA processing;mRNA processing;RNA splicing;negative regulation of translation;cell differentiation;negative regulation of translation in response to stress;negative regulation of translation involved in gene silencing by miRNA;entrainment of circadian clock by…	nucleus;nucleoplasm;nucleolus;cytoplasm;cytoplasmic stress granule;nuclear speck;	2.855	2.802	3.02	3.048	2.473	2.569	2.728	2.534	-0.037	-0.007	-0.378	-0.475
Q9UKJ3	GPATCH8	G patch domain-containing protein 8			2.439	2.486	2.079	2.031	2.131	2.192	2.441	2.25	0.075	0.092	-0.224	-0.298
Q86UE4	MTDH	Protein LYRIC	negative regulation of transcription from RNA polymerase II promoter;positive regulation of autophagy;lipopolysaccharide-mediated signaling pathway;negative regulation of apoptotic process;positive regulation of I-kappaB kinase/NF-kappaB signaling;positive regulation of angiogenesis;positive regulation of NF-kappaB transcription factor activity;positive regulation of protein kinase B signaling;bi…	nucleus;nucleolus;cytoplasm;endoplasmic reticulum;endoplasmic reticulum membrane;bicellular tight junction;integral component of membrane;apical plasma membrane;nuclear body;nuclear membrane;intercellular canaliculus;perinuclear region of cytoplasm;	3.344	3.528	4.451	4.579	2.983	3.042	3.31	3.141	-0.464	-0.403	-0.861	-0.628
Q8IY37	DHX37	Probable ATP-dependent RNA helicase DHX37	RNA processing;	nucleolus;cytoplasm;	2.692	3.014	3.823	3.924	2.462	2.46	2.858	2.863	-0.434	-0.398	-0.692	-0.378
Q6W2J9	BCOR	BCL-6 corepressor	negative regulation of transcription from RNA polymerase II promoter;negative regulation of histone H3-K36 methylation;transcription, DNA-templated;heart development;negative regulation of bone mineralization;histone H2A monoubiquitination;odontogenesis;negative regulation of transcription, DNA-templated;negative regulation of histone H3-K4 methylation;palate development;specification of axis pol…	nucleus;PcG protein complex;	3.073	3.124	2.726	2.846	2.25	2.321	2.65	2.281	-0.046	0.114	-0.117	-0.125
Q76FK4	NOL8	Nucleolar protein 8	DNA replication;rRNA processing;positive regulation of cell growth;	nucleus;nucleolus;cytoplasm;	2.889	3.006	3.678	3.745	2.515	2.614	2.875	2.819	-0.27	-0.193	-0.708	-0.636
Q2TAY7	SMU1	WD40 repeat-containing protein SMU1		nucleus;cytoplasm;	2.725	2.973	2.694	2.972	2.46	2.618	2.986	2.951	-0.031	0.072	-0.023	0.147
P55010	EIF5	Eukaryotic translation initiation factor 5	translation;translational initiation;regulation of translational initiation;gene expression;cellular protein metabolic process;	cytoplasm;cytosol;plasma membrane;nucleus;	3.636	3.723	3.371	3.664	3.171	3.35	3.689	3.643	-0.851	-0.76	-1.3	-1.083
Q9BZF9	UACA	Uveal autoantigen with coiled-coil domains and ankyrin repeats	apoptotic signaling pathway;regulation of NIK/NF-kappaB signaling;	extracellular region;nucleus;nucleoplasm;cytoplasm;mitochondrion;cytoskeleton;extracellular exosome;	3.348	3.554	3.283	3.481	2.786	2.838	3.73	3.663	-1.182	-0.999	-1.561	-1.363
E7ENZ3	CCT5	T-complex protein 1 subunit epsilon	protein folding;	nucleolus;cytoplasm;	2.652	2.796	2.881	3.016	2.503	2.537	3.059	3.102	-0.467	-0.374	-0.709	-0.618
P46060	RANGAP1	Ran GTPase-activating protein 1	mitotic cell cycle;signal transduction;small GTPase mediated signal transduction;positive regulation of GTPase activity;negative regulation of protein export from nucleus;response to axon injury;cellular response to peptide hormone stimulus;	condensed chromosome kinetochore;spindle pole;nuclear pore;cytoplasm;cytosol;dendrite;nuclear membrane;nuclear pore cytoplasmic filaments;perinuclear region of cytoplasm;mitotic spindle;kinetochore;	3.569	3.814	3.137	3.422	2.954	3.079	3.687	3.59	-0.919	-0.798	-1.358	-1.123
Q14C86	GAPVD1	GTPase-activating protein and VPS9 domain-containing protein 1	endocytosis;signal transduction;positive regulation of GTPase activity;regulation of protein transport;	endosome;cytosol;membrane;	3.708	3.861	3.079	3.243	2.904	3.108	3.881	3.709	-1.072	-0.933	-1.204	-1.095
Q14258	TRIM25	E3 ubiquitin/ISG15 ligase TRIM25	DNA repair;protein monoubiquitination;viral process;cytokine-mediated signaling pathway;translesion synthesis;negative regulation of type I interferon production;ERAD pathway;protein ubiquitination involved in ubiquitin-dependent protein catabolic process;positive regulation of I-kappaB kinase/NF-kappaB signaling;innate immune response;regulation of viral entry into host cell;negative regulation …	nucleoplasm;cytoplasm;cytosol;	3.581	3.698	3.935	4.031	3.001	2.962	3.483	3.537	-0.645	-0.684	-1.031	-0.717
Q99798	ACO2	Aconitate hydratase, mitochondrial	generation of precursor metabolites and energy;tricarboxylic acid cycle;citrate metabolic process;isocitrate metabolic process;cellular metabolic process;small molecule metabolic process;	nucleus;mitochondrion;mitochondrial matrix;myelin sheath;	2.79	3.002	2.87	3.165	2.585	2.672	3.038	2.947	-0.102	-0.022	-0.582	-0.329
P15880	RPS2	40S ribosomal protein S2	nuclear-transcribed mRNA catabolic process, nonsense-mediated decay;translation;translational initiation;translational elongation;translational termination;SRP-dependent cotranslational protein targeting to membrane;gene expression;viral process;viral life cycle;viral transcription;cellular protein metabolic process;positive regulation of transferase activity;	nucleus;nucleoplasm;cytoplasm;cytosol;focal adhesion;membrane;cytosolic small ribosomal subunit;extracellular exosome;nucleolus;	2.904	3.157	3.872	4.084	2.916	2.984	3.172	2.964	-0.467	-0.449	-0.715	-0.552
P00338	LDHA	L-lactate dehydrogenase A chain	response to hypoxia;lactate metabolic process;pyruvate metabolic process;glycolytic process;response to nutrient;response to glucose;NAD metabolic process;substantia nigra development;cellular response to extracellular stimulus;response to drug;response to hydrogen peroxide;positive regulation of apoptotic process;response to estrogen;cellular metabolic process;small molecule metabolic process;po…	nucleus;mitochondrion;cytosol;membrane;sperm fibrous sheath;extracellular exosome;	2.691	2.837	2.951	3.106	2.601	2.673	3.409	3.206	-0.315	-0.194	-0.516	-0.442
Q92615	LARP4B	La-related protein 4B	positive regulation of translation;	nucleolus;cytoplasm;cytosol;cytoplasmic stress granule;membrane;polysomal ribosome;	3.502	3.734	3.469	3.796	3.082	3.101	3.699	3.542	-0.839	-0.842	-1.333	-1.025
Q99832	CCT7	T-complex protein 1 subunit eta	protein folding;binding of sperm to zona pellucida;cellular protein metabolic process;'de novo' posttranslational protein folding;toxin transport;	zona pellucida receptor complex;cytoplasm;mitochondrion;cytosol;chaperonin-containing T-complex;microtubule;cell body;extracellular exosome;	2.835	3.017	3.107	3.328	2.797	2.873	3.341	3.211	-0.371	-0.336	-0.522	-0.366
P62495	ETF1	Eukaryotic peptide chain release factor subunit 1	nuclear-transcribed mRNA catabolic process, nonsense-mediated decay;translation;translational termination;regulation of translational termination;protein methylation;gene expression;cellular protein metabolic process;	cytoplasm;cytosol;translation release factor complex;nucleus;	2.716	3.057	3.182	3.375	2.64	2.686	3.3	3.248	-0.724	-0.628	-1.281	-0.971
P26641	EEF1G	Elongation factor 1-gamma	translation;translational elongation;response to virus;gene expression;cellular protein metabolic process;	nucleus;cytoplasm;cytosol;membrane;extracellular exosome;endoplasmic reticulum;	2.949	3.035	3.679	3.841	2.744	2.778	3.206	3.151	-0.47	-0.365	-0.787	-0.683
P30101	PDIA3	Protein disulfide-isomerase A3	antigen processing and presentation of peptide antigen via MHC class I;antigen processing and presentation of exogenous peptide antigen via MHC class I, TAP-dependent;protein folding;proteolysis;protein import into nucleus;protein retention in ER lumen;signal transduction;protein N-linked glycosylation via asparagine;protein folding in endoplasmic reticulum;response to endoplasmic reticulum stres…	nucleus;endoplasmic reticulum;endoplasmic reticulum lumen;smooth endoplasmic reticulum;focal adhesion;cell surface;melanosome;myelin sheath;extracellular exosome;	2.61	2.934	2.919	3.192	2.796	2.771	3.001	2.876	-0.283	-0.296	-1.05	-0.762
Q99959	PKP2	Plakophilin-2	desmosome assembly;heart development;negative regulation of cell proliferation;positive regulation of sodium ion transport;gap junction assembly;single organismal cell-cell adhesion;negative regulation of cell migration;adherens junction maintenance;intermediate filament bundle assembly;maintenance of organ identity;ventricular cardiac muscle tissue morphogenesis;lipid homeostasis;cardiac muscle …	nucleus;nucleoplasm;intermediate filament;plasma membrane;cell-cell junction;adherens junction;intercalated disc;integral component of membrane;cell junction;desmosome;	3.008	3.075	2.618	2.674	2.589	2.571	3.501	3.45	-1.146	-0.825	-1.463	-1.414
O00151	PDLIM1	PDZ and LIM domain protein 1	response to hypoxia;regulation of transcription, DNA-templated;response to oxidative stress;	transcription factor complex;cytoplasm;cytoskeleton;focal adhesion;	3.744	3.837	3.511	3.698	3.05	3.185	3.854	3.797	-1.247	-1.127	-1.707	-1.537
Q6P2H3	CEP85	Centrosomal protein of 85 kDa		spindle pole;nucleolus;cytoplasm;Golgi apparatus;centrosome;	3.419	3.683	3.279	3.502	2.601	2.714	3.387	3.229	-0.674	-0.603	-0.96	-0.757
Q15437	SEC23B	Protein transport protein Sec23B	intracellular protein transport;ER to Golgi vesicle-mediated transport;vesicle-mediated transport;	Golgi membrane;endoplasmic reticulum membrane;endomembrane system;membrane;COPII vesicle coat;endoplasmic reticulum-Golgi intermediate compartment membrane;intracellular membrane-bounded organelle;perinuclear region of cytoplasm;	3.173	3.618	2.575	2.763	2.408	2.626	3.166	3.076	-0.56	-0.53	-0.359	-0.337
Q9H7B2	RPF2	Ribosome production factor 2 homolog	ribosomal large subunit assembly;maturation of LSU-rRNA from tricistronic rRNA transcript (SSU-rRNA, 5.8S rRNA, LSU-rRNA);	nucleus;nucleolus;	2.765	2.831	3.969	4.184	2.324	2.404	2.684	2.571	-0.143	-0.067	-0.406	-0.383
Q9P2M7	CGN	Cingulin	microtubule cytoskeleton organization;epithelial cell morphogenesis;transforming growth factor beta receptor signaling pathway;metabolic process;bicellular tight junction assembly;	bicellular tight junction;myosin complex;cell junction;	2.709	2.666	2.566	2.519	2.132	2.277	3.432	3.225	-1.437	-1.169	-1.737	-1.774
P40926	MDH2	Malate dehydrogenase, mitochondrial	carbohydrate metabolic process;glucose metabolic process;gluconeogenesis;tricarboxylic acid cycle;oxaloacetate metabolic process;malate metabolic process;internal protein amino acid acetylation;NADH metabolic process;cellular metabolic process;small molecule metabolic process;	nucleus;nucleoplasm;mitochondrion;mitochondrial inner membrane;mitochondrial matrix;plasma membrane;myelin sheath;extracellular exosome;	2.373	2.675	2.662	2.948	2.36	2.484	2.98	2.84	-0.036	0.041	-0.532	-0.221
O60306	AQR	Intron-binding protein aquarius	mRNA splicing, via spliceosome;	nucleus;nucleoplasm;membrane;catalytic step 2 spliceosome;	2.616	2.826	3.302	3.465	2.48	2.53	3.061	2.988	-0.394	-0.33	-0.668	-0.457
Q96DH6	MSI2	RNA-binding protein Musashi homolog 2	stem cell development;	cytoplasm;polysome;	3.877	3.966	3.394	3.537	3.11	3.266	3.787	3.875	-1.177	-1.06	-1.497	-1.314
P57678	GEMIN4	Gem-associated protein 4	spliceosomal snRNP assembly;rRNA processing;gene expression;ncRNA metabolic process;	nucleoplasm;nucleolus;cytoplasm;cytosol;membrane;small nuclear ribonucleoprotein complex;SMN complex;SMN-Sm protein complex;extracellular exosome;Gemini of coiled bodies;	3.497	3.789	3.22	3.404	2.556	2.689	3.554	3.403	-0.797	-0.645	-0.788	-0.563
Q15075	EEA1	Early endosome antigen 1	endocytosis;vesicle fusion;synaptic vesicle to endosome fusion;early endosome to late endosome transport;	cytoplasm;early endosome;cytosol;serine-pyruvate aminotransferase complex;membrane;extrinsic component of plasma membrane;cytoplasmic vesicle;early endosome membrane;axonal spine;extracellular exosome;	3.18	3.39	3.153	3.361	2.992	3.031	3.798	3.408	-0.805	-0.844	-1.394	-1.25
Q9UKV8	AGO2	Protein argonaute-2	transcription, DNA-templated;translation;translational initiation;epidermal growth factor receptor signaling pathway;Notch signaling pathway;fibroblast growth factor receptor signaling pathway;post-embryonic development;gene expression;RNA secondary structure unwinding;miRNA metabolic process;posttranscriptional gene silencing;gene silencing by RNA;pre-miRNA processing;siRNA loading onto RISC inv…	cytoplasmic mRNA processing body;nucleus;nucleoplasm;cytoplasm;cytosol;polysome;mRNA cap binding complex;membrane;RISC complex;dendrite;ribonucleoprotein complex;micro-ribonucleoprotein complex;RISC-loading complex;	3.183	3.265	2.919	3.021	2.349	2.457	3.203	3.129	-0.749	-0.69	-0.944	-0.849
P22234	PAICS	Multifunctional protein ADE2	purine nucleobase metabolic process;'de novo' IMP biosynthetic process;purine nucleobase biosynthetic process;purine ribonucleoside monophosphate biosynthetic process;small molecule metabolic process;nucleobase-containing small molecule metabolic process;	cytosol;membrane;extracellular exosome;	3.237	3.432	2.786	3.1	2.971	2.95	3.624	3.598	-1.025	-0.913	-1.178	-0.966
O95239	KIF4A	Chromosome-associated kinesin KIF4A	mitotic cytokinesis;organelle organization;microtubule-based movement;axon guidance;blood coagulation;anterograde axon cargo transport;metabolic process;antigen processing and presentation of exogenous peptide antigen via MHC class II;mitotic spindle midzone assembly;	nucleoplasm;chromosome;cytoplasm;cytosol;kinesin complex;spindle microtubule;membrane;nuclear matrix;midbody;	3.001	3.067	3.14	3.414	2.455	2.535	3.108	2.891	-0.296	-0.168	-0.541	-0.603
Q6DKI1	RPL7L1	60S ribosomal protein L7-like 1	maturation of LSU-rRNA from tricistronic rRNA transcript (SSU-rRNA, 5.8S rRNA, LSU-rRNA);blastocyst formation;cytoplasmic translation;	nucleolus;cytosolic large ribosomal subunit;	2.695	3.004	4.232	4.307	2.512	2.564	2.861	2.759	-0.247	-0.193	-0.637	-0.269
P07195	LDHB	L-lactate dehydrogenase B chain	carbohydrate metabolic process;lactate metabolic process;pyruvate metabolic process;NAD metabolic process;cellular metabolic process;small molecule metabolic process;oxidation-reduction process;	cytoplasm;mitochondrion;cytosol;membrane;myelin sheath;membrane raft;extracellular exosome;	2.766	2.934	3.28	3.441	2.714	2.81	3.256	3.186	-0.012	0.055	-0.415	-0.199
Q15061	WDR43	WD repeat-containing protein 43		nucleolus;	2.884	2.944	1.027	1.053	2.435	2.448	2.795	2.615	-0.27	-0.144	-0.552	-0.503
P14868	DARS	Aspartate--tRNA ligase, cytoplasmic	translation;tRNA aminoacylation for protein translation;aspartyl-tRNA aminoacylation;protein complex assembly;gene expression;	cytoplasm;cytosol;membrane;extracellular exosome;	2.83	2.797	2.888	2.863	2.403	2.488	2.912	2.693	-0.359	-0.25	-0.611	-0.508
O94906	PRPF6	Pre-mRNA-processing factor 6	spliceosomal tri-snRNP complex assembly;spliceosomal complex assembly;RNA splicing, via transesterification reactions;mRNA splicing, via spliceosome;RNA localization;RNA splicing;gene expression;positive regulation of transcription from RNA polymerase II promoter;	nucleus;nucleoplasm;spliceosomal complex;U5 snRNP;membrane;nuclear speck;U4/U6 x U5 tri-snRNP complex;U4/U6 snRNP;catalytic step 2 spliceosome;	2.598	2.486	2.22	2.191	1.962	2.117	2.479	2.225	-0.15	0.079	-0.555	-0.523
Q10567	AP1B1	AP-1 complex subunit beta-1	intracellular protein transport;post-Golgi vesicle-mediated transport;viral process;antigen processing and presentation of exogenous peptide antigen via MHC class II;regulation of defense response to virus by virus;membrane organization;	Golgi membrane;lysosomal membrane;cytosol;clathrin adaptor complex;cytoplasmic vesicle membrane;clathrin-coated endocytic vesicle membrane;trans-Golgi network membrane;	3.389	3.533	3.176	3.312	2.884	3.087	3.726	3.571	-0.915	-0.828	-1.296	-1.017
P12270	TPR	Nucleoprotein TPR	negative regulation of transcription from RNA polymerase II promoter;MAPK import into nucleus;mitotic cell cycle;carbohydrate metabolic process;RNA import into nucleus;RNA export from nucleus;nuclear pore organization;mitotic nuclear division;mitotic nuclear envelope disassembly;mitotic spindle assembly checkpoint;hexose transport;gene expression;regulation of glucose transport;regulation of mito…	kinetochore;nucleus;nuclear envelope;nuclear pore;nucleoplasm;cytoplasm;cytoplasmic dynein complex;extrinsic component of membrane;nuclear membrane;nuclear periphery;nuclear inclusion body;nuclear pore nuclear basket;mitotic spindle;kinetochore;kinetochore;	2.727	2.86	2.47	2.579	2.215	2.271	3.101	2.859	-0.522	-0.404	-0.603	-0.466
P63244	RACK1	Receptor of activated protein C kinase 1	osteoblast differentiation;positive regulation of protein phosphorylation;activation of cysteine-type endopeptidase activity involved in apoptotic process;cell cycle;gastrulation;negative regulation of gene expression;viral process;negative regulation of translation;negative regulation of Wnt signaling pathway;negative regulation of cell growth;positive regulation of cell migration;positive regul…	phagocytic cup;nucleus;cytoplasm;mitochondrion;cytosol;cytoskeleton;small ribosomal subunit;dendrite;midbody;neuronal cell body;perikaryon;perinuclear region of cytoplasm;extracellular exosome;IRE1-RACK1-PP2A complex;	3.122	3.272	3.083	3.209	2.642	2.776	3.401	3.299	-0.819	-0.735	-0.81	-0.612
B5MCF9	PES1	Pescadillo homolog	maturation of LSU-rRNA from tricistronic rRNA transcript (SSU-rRNA, 5.8S rRNA, LSU-rRNA);maturation of 5.8S rRNA from tricistronic rRNA transcript (SSU-rRNA, 5.8S rRNA, LSU-rRNA);	nucleus;nucleoplasm;chromosome;nucleolus;cytoplasm;preribosome, large subunit precursor;	2.648	2.791	4.195	4.206	2.594	2.642	3.074	2.937	-0.158	-0.171	-0.73	-0.538
Q1KMD3	HNRNPUL2	Heterogeneous nuclear ribonucleoprotein U-like protein 2		nucleus;membrane;	2.503	2.637	3.304	3.389	2.089	2.224	2.857	2.734	-0.331	-0.283	-0.727	-0.678
Q9UG63	ABCF2	ATP-binding cassette sub-family F member 2	transport;metabolic process;	mitochondrial envelope;membrane;ATP-binding cassette (ABC) transporter complex;	3.067	3.383	3.588	3.85	2.718	2.854	3.16	3.094	-0.515	-0.44	-0.92	-0.666
A0A0A0MRJ0	CDC42BPA	Serine/threonine-protein kinase MRCK alpha	protein phosphorylation;actin cytoskeleton reorganization;intracellular signal transduction;	intracellular;	2.856	3.111	3.144	3.134	2.323	2.495	3.386	3.096	-0.644	-0.519	-0.887	-0.862
Q9Y2R4	DDX52	Probable ATP-dependent RNA helicase DDX52	metabolic process;	nucleus;nucleolus;membrane;	2.815	3.059	3.646	4.065	2.492	2.563	2.892	2.857	-0.271	-0.178	-0.912	-0.631
Q8TEP8-3	CEP192	Isoform 3 of Centrosomal protein of 192 kDa	G2/M transition of mitotic cell cycle;mitotic cell cycle;organelle organization;negative regulation of phosphatase activity;spindle assembly;centrosome duplication;	pericentriolar material;cytoplasm;centrosome;centriole;cytosol;	3.641	3.908	2.708	2.886	2.854	2.901	3.208	3	-0.368	-0.279	-0.505	-0.294
P40429	RPL13A	60S ribosomal protein L13a	nuclear-transcribed mRNA catabolic process, nonsense-mediated decay;translation;translational initiation;translational elongation;translational termination;SRP-dependent cotranslational protein targeting to membrane;gene expression;viral process;negative regulation of translation;viral life cycle;viral transcription;cellular protein metabolic process;cellular response to interferon-gamma;negative…	nucleus;nucleolus;cytoplasm;cytosol;focal adhesion;large ribosomal subunit;membrane;cytosolic large ribosomal subunit;ribonucleoprotein complex;GAIT complex;	2.56	2.629	4.127	4.123	2.643	2.743	2.88	2.631	0.028	0.093	-0.74	-0.554
Q13625	TP53BP2	Apoptosis-stimulating of p53 protein 2	cell cycle;signal transduction;central nervous system development;heart development;embryo development ending in birth or egg hatching;positive regulation of signal transduction;response to ionizing radiation;negative regulation of cell cycle;intrinsic apoptotic signaling pathway by p53 class mediator;positive regulation of execution phase of apoptosis;positive regulation of neuron death;	nucleus;cytoplasm;perinuclear region of cytoplasm;perinuclear region of cytoplasm;	3.544	3.691	3.133	3.319	2.981	3.081	3.805	3.833	-1.346	-1.251	-1.602	-1.479
Q9BY77	POLDIP3	Polymerase delta-interacting protein 3	poly(A)+ mRNA export from nucleus;positive regulation of translation;	nucleoplasm;cytoplasm;nuclear speck;intracellular membrane-bounded organelle;transcription export complex;exon-exon junction complex;	2.709	2.803	2.188	2.216	2.563	2.62	2.58	2.455	0.072	0.101	-0.52	-0.506
O43303	CCP110	Centriolar coiled-coil protein of 110 kDa	G2/M transition of mitotic cell cycle;mitotic cell cycle;organelle organization;centriole replication;cell projection organization;regulation of cytokinesis;centrosome duplication;	centrosome;centriole;cytosol;protein complex;	3.404	3.416	3.171	3.281	2.473	2.499	3.235	3.108	-0.537	-0.453	-0.646	-0.484
P62753	RPS6	40S ribosomal protein S6	G1/S transition of mitotic cell cycle;nuclear-transcribed mRNA catabolic process, nonsense-mediated decay;placenta development;T cell proliferation involved in immune response;rRNA processing;translation;translational initiation;translational elongation;translational termination;SRP-dependent cotranslational protein targeting to membrane;activation-induced cell death of T cells;mitotic nuclear di…	nucleus;nucleolus;cytoplasm;cytosol;polysome;small ribosomal subunit;membrane;cytosolic small ribosomal subunit;dendrite;ribonucleoprotein complex;cytoplasmic ribonucleoprotein granule;cell body;perinuclear region of cytoplasm;	2.12	2.193	3.993	3.978	1.982	2.039	2.415	2.283	-0.311	-0.285	-0.528	-0.503
P52948	NUP98	Nuclear pore complex protein Nup98-Nup96	protein import into nucleus, docking;mitotic cell cycle;carbohydrate metabolic process;DNA replication;nucleocytoplasmic transport;nuclear pore organization;mitotic nuclear envelope disassembly;small GTPase mediated signal transduction;hexose transport;gene expression;regulation of glucose transport;glucose transport;viral process;protein sumoylation;viral life cycle;viral transcription;cytokine-…	nuclear envelope;nuclear pore;nucleoplasm;cytosol;nuclear pore outer ring;nuclear membrane;nuclear periphery;nuclear inclusion body;nuclear pore nuclear basket;kinetochore;	3.483	3.626	3.06	3.303	2.827	2.97	3.629	3.518	-0.695	-0.594	-0.951	-0.811
P42345	MTOR	Serine/threonine-protein kinase mTOR	double-strand break repair via homologous recombination;positive regulation of protein phosphorylation;positive regulation of endothelial cell proliferation;regulation of glycogen biosynthetic process;'de novo' pyrimidine nucleobase biosynthetic process;transcription initiation from RNA polymerase II promoter;protein phosphorylation;response to stress;cell cycle arrest;signal transduction;epiderm…	Golgi membrane;nucleoplasm;cytoplasm;mitochondrial outer membrane;lysosome;lysosomal membrane;endoplasmic reticulum membrane;cytosol;phosphatidylinositol 3-kinase complex;endomembrane system;membrane;dendrite;TORC1 complex;TORC2 complex;neuronal cell body;PML body;	3.221	3.268	2.743	3.073	2.502	2.627	3.1	3.043	-0.575	-0.346	-0.667	-0.47
Q92522	H1FX	Histone H1x	nucleosome assembly;	nucleosome;nucleus;nucleolus;	-0.697	-0.705	3.708	3.669	-0.024	-0.146	-0.26	-0.305	0.245	0.152	-0.506	-0.542
Q9BU76	MMTAG2	Multiple myeloma tumor-associated protein 2			1.867	2.149	0.082	0.419	1.841	1.818	2.172	2.036	-0.286	-0.252	-0.922	-0.699
P46781	RPS9	40S ribosomal protein S9	nuclear-transcribed mRNA catabolic process, nonsense-mediated decay;translation;translational initiation;translational elongation;translational termination;SRP-dependent cotranslational protein targeting to membrane;positive regulation of cell proliferation;gene expression;viral process;viral life cycle;viral transcription;cellular protein metabolic process;positive regulation of translational fi…	nucleus;nucleolus;cytoplasm;cytosol;ribosome;focal adhesion;membrane;cytosolic small ribosomal subunit;ribonucleoprotein complex;extracellular exosome;	2.733	2.919	3.454	3.845	2.921	2.98	3.103	2.956	-0.372	-0.284	-0.951	-0.695
Q15003	NCAPH	Condensin complex subunit 2	mitotic cell cycle;mitotic chromosome condensation;cell division;	condensin complex;nucleus;cytoplasm;cytosol;membrane;	3.461	3.404	3.888	4.102	2.71	2.867	3.411	3.09	-0.476	-0.364	-0.771	-0.769
P23526	AHCY	Adenosylhomocysteinase	sulfur amino acid metabolic process;response to hypoxia;chronic inflammatory response to antigenic stimulus;one-carbon metabolic process;xenobiotic metabolic process;response to nutrient;S-adenosylhomocysteine catabolic process;methylation;S-adenosylmethionine cycle;cellular nitrogen compound metabolic process;circadian sleep/wake cycle;small molecule metabolic process;homocysteine biosynthetic p…	nucleus;cytoplasm;cytosol;melanosome;neuron projection;extracellular exosome;	2.964	3.133	2.856	3.086	2.789	2.837	3.476	3.358	-0.736	-0.64	-0.896	-0.672
Q9NSE4	IARS2	Isoleucine--tRNA ligase, mitochondrial	tRNA aminoacylation for protein translation;isoleucyl-tRNA aminoacylation;regulation of translational fidelity;gene expression;mitochondrial translation;	cytoplasm;mitochondrion;mitochondrial matrix;cytosol;	2.93	3.024	3.009	3.154	2.602	2.749	3.077	2.892	-0.043	0.029	-0.481	-0.313
Q8TDY2	RB1CC1	RB1-inducible coiled-coil protein 1	autophagosome assembly;liver development;positive regulation of protein phosphorylation;transcription, DNA-templated;regulation of transcription, DNA-templated;cell cycle;JNK cascade;heart development;regulation of autophagy;positive regulation of cell size;negative regulation of extrinsic apoptotic signaling pathway;	cytoplasm;cytosol;nuclear membrane;pre-autophagosomal structure membrane;ATG1/UKL1 kinase complex;	3.51	3.679	3.191	3.4	2.643	2.805	3.522	3.259	-0.709	-0.669	-0.662	-0.533
Q9Y4F3	MARF1	Meiosis regulator and mRNA stability factor 1	double-strand break repair;female meiotic division;regulation of gene expression;negative regulation of phosphatase activity;oogenesis;	peroxisome;membrane;	3.832	3.981	3.541	3.89	3.082	3.142	3.516	3.458	-0.37	-0.381	-0.522	-0.299
P56182	RRP1	Ribosomal RNA processing protein 1 homolog A	rRNA processing;	nucleus;nucleolus;preribosome, small subunit precursor;	2.069	2.303	3.684	3.8	1.781	1.853	2.419	2.359	-0.333	-0.328	-0.837	-0.731
Q9BYW2	SETD2	Histone-lysine N-methyltransferase SETD2	angiogenesis;morphogenesis of a branching structure;neural tube closure;mismatch repair;chromatin organization;regulation of transcription, DNA-templated;transcription elongation from RNA polymerase II promoter;regulation of mRNA export from nucleus;forebrain development;nucleosome organization;cell migration involved in vasculogenesis;mesoderm morphogenesis;embryonic cranial skeleton morphogenes…	nucleoplasm;chromosome;	3.344	3.37	3.035	3.314	2.86	2.94	3.328	3.245	-0.312	-0.255	-0.792	-0.491
Q14978	NOLC1	Nucleolar and coiled-body phosphoprotein 1	rRNA processing;nucleolus organization;cell cycle;mitotic nuclear division;	nucleoplasm;nucleolus;cytoplasm;Cajal body;	1.932	2.022	0.944	1.056	1.976	1.976	2.294	2.251	-0.115	0.002	-0.158	0.096
Q9UPN9	TRIM33	E3 ubiquitin-protein ligase TRIM33	negative regulation of transcription from RNA polymerase II promoter;transcription, DNA-templated;transcription initiation from RNA polymerase II promoter;transforming growth factor beta receptor signaling pathway;gene expression;protein ubiquitination;regulation of transforming growth factor beta receptor signaling pathway;negative regulation of BMP signaling pathway;negative regulation of trans…	nucleus;nucleoplasm;intracellular membrane-bounded organelle;	3.516	3.762	3.518	3.742	2.908	3.039	3.406	3.281	-0.477	-0.406	-0.785	-0.586
Q15084	PDIA6	Protein disulfide-isomerase A6	protein folding;endoplasmic reticulum unfolded protein response;response to endoplasmic reticulum stress;IRE1-mediated unfolded protein response;cellular protein metabolic process;cell redox homeostasis;	endoplasmic reticulum;endoplasmic reticulum lumen;endoplasmic reticulum membrane;endoplasmic reticulum-Golgi intermediate compartment;plasma membrane;endoplasmic reticulum chaperone complex;melanosome;extracellular exosome;	2.909	3.041	3.17	3.309	2.839	2.916	3.429	3.292	-0.677	-0.556	-1.227	-1.092
Q9UGI8	TES	Testin	negative regulation of cell proliferation;	nucleus;cytoplasm;plasma membrane;focal adhesion;cell junction;protein complex;	3.807	3.945	3.281	3.392	3.13	3.329	4.043	3.73	-0.866	-0.742	-1.187	-1.099
Q9ULW0	TPX2	Targeting protein for Xklp2	apoptotic process;mitotic nuclear division;cell proliferation;activation of protein kinase activity;cell division;regulation of mitotic spindle organization;	nucleus;nucleoplasm;cytoplasm;spindle;microtubule;microtubule cytoskeleton;axon hillock;spindle pole;	3.234	3.492	3.582	3.708	2.875	2.94	3.302	3.235	-0.637	-0.572	-1.095	-0.896
Q7Z4H7	HAUS6	HAUS augmin-like complex subunit 6	mitotic nuclear division;spindle assembly;centrosome organization;cell division;	nucleoplasm;cytoplasm;centrosome;microtubule organizing center;spindle;microtubule;HAUS complex;	3.893	3.93	3.46	3.575	3.025	3.077	3.658	3.581	-0.734	-0.733	-0.978	-0.733
P16615	ATP2A2	Sarcoplasmic/endoplasmic reticulum calcium ATPase 2	regulation of the force of heart contraction;cellular calcium ion homeostasis;ER-nucleus signaling pathway;organelle organization;cell adhesion;blood coagulation;metabolic process;epidermis development;positive regulation of heart rate;regulation of cardiac muscle contraction by calcium ion signaling;transition between fast and slow fiber;endoplasmic reticulum calcium ion homeostasis;positive reg…	endoplasmic reticulum;endoplasmic reticulum membrane;integral component of plasma membrane;vesicle membrane;longitudinal sarcoplasmic reticulum;membrane;sarcoplasmic reticulum;platelet dense tubular network membrane;extrinsic component of cytoplasmic side of plasma membrane;sarcoplasmic reticulum membrane;protein complex;perinuclear region of cytoplasm;calcium ion-transporting ATPase complex;ribb…	3.022	3.176	2.777	2.972	2.521	2.574	3.226	3.058	-0.354	-0.33	-0.415	-0.121
Q96P70	IPO9	Importin-9	protein import into nucleus;	nucleus;cytoplasm;membrane;	3.729	3.814	2.951	3.322	3.17	3.239	3.776	3.807	-1.046	-1.045	-1.183	-0.986
Q9NR09	BIRC6	Baculoviral IAP repeat-containing protein 6	protein phosphorylation;apoptotic process;mitotic nuclear division;positive regulation of cell proliferation;negative regulation of endopeptidase activity;protein ubiquitination;regulation of cytokinesis;regulation of cell proliferation;negative regulation of apoptotic process;cell division;labyrinthine layer development;spongiotrophoblast layer development;negative regulation of extrinsic apopto…	spindle pole;cytoplasm;endosome;trans-Golgi network;microtubule organizing center;membrane;midbody;	3.434	3.836	2.935	3.281	2.715	2.76	3.443	3.363	-0.684	-0.654	-0.711	-0.334
P46777	RPL5	60S ribosomal protein L5	ribosomal large subunit assembly;nuclear-transcribed mRNA catabolic process, nonsense-mediated decay;rRNA processing;translation;translational initiation;translational elongation;translational termination;SRP-dependent cotranslational protein targeting to membrane;gene expression;viral process;viral life cycle;viral transcription;ribosomal large subunit biogenesis;cellular protein metabolic proce…	nucleus;nucleolus;cytoplasm;cytosol;focal adhesion;membrane;cytosolic large ribosomal subunit;ribonucleoprotein complex;extracellular exosome;	2.317	2.373	4.124	4.141	2.484	2.544	2.583	2.461	-0.145	-0.064	-0.717	-0.626
P62241	RPS8	40S ribosomal protein S8	nuclear-transcribed mRNA catabolic process, nonsense-mediated decay;maturation of SSU-rRNA from tricistronic rRNA transcript (SSU-rRNA, 5.8S rRNA, LSU-rRNA);translation;translational initiation;translational elongation;translational termination;SRP-dependent cotranslational protein targeting to membrane;gene expression;viral process;viral life cycle;viral transcription;cellular protein metabolic …	nucleus;cytoplasm;cytosol;focal adhesion;membrane;cytosolic small ribosomal subunit;ribonucleoprotein complex;extracellular exosome;	1.666	1.857	3.959	4.182	2.017	2.047	2.114	2.031	-0.232	-0.167	-0.896	-0.674
P07355	ANXA2	Annexin A2	angiogenesis;membrane raft assembly;positive regulation of protein phosphorylation;negative regulation of receptor internalization;membrane budding;body fluid secretion;collagen fibril organization;positive regulation of vesicle fusion;negative regulation of low-density lipoprotein particle receptor catabolic process;osteoclast development;fibrinolysis;negative regulation of catalytic activity;po…	ruffle;basement membrane;extracellular space;nucleus;lysosomal membrane;endosome;early endosome;lipid particle;plasma membrane;cell cortex;cell surface;membrane;basolateral plasma membrane;extrinsic component of plasma membrane;midbody;late endosome membrane;vesicle;myelin sheath adaxonal region;sarcolemma;melanosome;Schmidt-Lanterman incisure;macropinosome;perinuclear region of cytoplasm;extrace…	2.95	3.065	2.701	2.837	2.114	2.193	3.936	3.628	-1.195	-1.033	-1.384	-1.212
Q9H2M9	RAB3GAP2	Rab3 GTPase-activating protein non-catalytic subunit	intracellular protein transport;positive regulation of catalytic activity;regulation of GTPase activity;positive regulation of GTPase activity;establishment of protein localization to endoplasmic reticulum membrane;positive regulation of endoplasmic reticulum tubular network organization;	cytoplasm;plasma membrane;protein complex;	3.005	3.298	2.72	3.028	2.426	2.491	3.323	3.245	-0.654	-0.601	-0.791	-0.655
Q96QD9	FYTTD1	UAP56-interacting factor	mRNA export from nucleus;	nucleoplasm;nuclear speck;	2.747	2.96	3.895	4.083	2.577	2.613	2.877	2.795	-0.291	-0.269	-0.834	-0.581
Q8N163	CCAR2	Cell cycle and apoptosis regulator protein 2	transcription, DNA-templated;mRNA processing;cellular response to DNA damage stimulus;cell cycle;RNA splicing;response to UV;Wnt signaling pathway;negative regulation of cell growth;regulation of protein stability;negative regulation of proteasomal ubiquitin-dependent protein catabolic process;regulation of DNA-templated transcription, elongation;cellular response to heat;regulation of circadian …	nuclear chromatin;nucleus;nucleoplasm;cytoplasm;mitochondrial matrix;DBIRD complex;spliceosomal complex;	2.691	2.887	3.532	3.651	2.573	2.609	3.048	2.925	-0.396	-0.273	-0.949	-0.729
P35573	AGL	Glycogen debranching enzyme	carbohydrate metabolic process;glycogen biosynthetic process;glycogen catabolic process;glucose metabolic process;response to nutrient;small molecule metabolic process;response to glucocorticoid;	nucleus;nucleoplasm;cytoplasm;cytosol;inclusion body;sarcoplasmic reticulum;isoamylase complex;	2.904	2.799	2.526	2.603	2.076	2.339	3.097	2.642	-0.502	-0.242	-0.347	-0.5
P07737	PFN1	Profilin-1	neural tube closure;platelet degranulation;regulation of transcription from RNA polymerase II promoter;blood coagulation;positive regulation of epithelial cell migration;actin cytoskeleton organization;platelet activation;negative regulation of actin filament polymerization;positive regulation of actin filament polymerization;negative regulation of actin filament bundle assembly;positive regulati…	nucleus;cytoplasm;cytosol;cytoskeleton;focal adhesion;cell cortex;membrane;extracellular exosome;blood microparticle;	3.274	3.58	2.73	3.008	3.019	3.1	3.687	3.675	-1.312	-1.196	-1.618	-1.376
Q9H9A6	LRRC40	Leucine-rich repeat-containing protein 40		membrane;	3.047	3.232	3.102	3.369	2.632	2.673	3.403	3.332	-0.732	-0.623	-1.198	-0.899
Q5T8P6	RBM26	RNA-binding protein 26	mRNA processing;negative regulation of phosphatase activity;		2.391	2.357	3.193	3.329	2.109	2.132	2.678	2.454	-0.406	-0.327	-1.01	-0.952
Q9UKM9	RALY	RNA-binding protein Raly	mRNA splicing, via spliceosome;	nucleus;catalytic step 2 spliceosome;	2.746	2.863	4.16	4.313	2.667	2.668	2.997	2.865	-0.22	-0.191	-0.7	-0.661
Q8IW35	CEP97	Centrosomal protein of 97 kDa	organelle organization;cell projection organization;	cytoplasm;centrosome;microtubule organizing center;cytosol;protein complex;	3.373	3.617	3.345	3.61	2.541	2.758	3.387	3.305	-0.981	-0.891	-0.963	-0.864
Q12849	GRSF1	G-rich sequence factor 1	mRNA polyadenylation;tRNA processing;anterior/posterior pattern specification;morphogenesis of embryonic epithelium;	cytoplasm;mitochondrion;mitochondrial nucleoid;	2.95	3.082	3.369	3.546	2.564	2.654	3.075	2.926	-0.38	-0.335	-0.805	-0.561
Q14669-2	TRIP12	Isoform 2 of E3 ubiquitin-protein ligase TRIP12	DNA repair;cellular response to DNA damage stimulus;embryo development;protein ubiquitination involved in ubiquitin-dependent protein catabolic process;negative regulation of histone H2A K63-linked ubiquitination;negative regulation of double-strand break repair;	nucleus;nucleoplasm;cytoplasm;	2.814	3.132	3.204	3.477	2.551	2.641	3.068	3.002	-0.548	-0.482	-1.016	-0.636
Q9NZN8	CNOT2	CCR4-NOT transcription complex subunit 2	negative regulation of transcription from RNA polymerase II promoter;nuclear-transcribed mRNA catabolic process, deadenylation-dependent decay;nuclear-transcribed mRNA poly(A) tail shortening;trophectodermal cell differentiation;transcription, DNA-templated;regulation of transcription from RNA polymerase II promoter;regulation of translation;gene expression;positive regulation of cytoplasmic mRNA…	nucleus;cytoplasm;cytosol;membrane;CCR4-NOT complex;	3.729	3.61	2.875	2.813	2.626	2.709	3.599	3.468	-0.87	-0.828	-1.064	-1.062
Q9P1Y5	CAMSAP3	Calmodulin-regulated spectrin-associated protein 3	microtubule cytoskeleton organization;negative regulation of phosphatase activity;regulation of organelle organization;microtubule anchoring;zonula adherens maintenance;regulation of microtubule cytoskeleton organization;epithelial cell-cell adhesion;	cytoplasm;zonula adherens;microtubule minus-end;centrosome;	3.192	3.366	3.199	3.216	2.639	2.746	3.219	2.996	-0.493	-0.338	-0.761	-0.749
Q8NDV7	TNRC6A	Trinucleotide repeat-containing gene 6A protein	epidermal growth factor receptor signaling pathway;Notch signaling pathway;fibroblast growth factor receptor signaling pathway;cellular response to starvation;gene expression;posttranscriptional gene silencing;gene silencing by miRNA;negative regulation of translation involved in gene silencing by miRNA;Fc-epsilon receptor signaling pathway;innate immune response;neurotrophin TRK receptor signali…	cytoplasmic mRNA processing body;nucleoplasm;cytosol;micro-ribonucleoprotein complex;	3.288	3.364	3.033	3.061	2.634	2.702	3.217	3.138	-0.731	-0.574	-0.817	-0.702
P26639	TARS	Threonine--tRNA ligase, cytoplasmic	translation;tRNA aminoacylation for protein translation;threonyl-tRNA aminoacylation;gene expression;	cytoplasm;cytosol;actin cytoskeleton;extracellular exosome;	2.837	3.136	3.021	3.231	2.613	2.589	3.333	3.165	-0.505	-0.424	-0.953	-0.674
P15170-2	GSPT1	Isoform 2 of Eukaryotic peptide chain release factor GTP-binding subunit ERF3A	G1/S transition of mitotic cell cycle;nuclear-transcribed mRNA catabolic process, nonsense-mediated decay;translational termination;protein methylation;	intracellular;	3.372	3.57	3.211	3.3	2.829	2.953	3.645	3.474	-0.892	-0.846	-1.044	-0.816
P21796	VDAC1	Voltage-dependent anion-selective channel protein 1	behavioral fear response;anion transport;mitochondrial calcium ion transport;apoptotic process;neuron-neuron synaptic transmission;learning;viral process;epithelial cell differentiation;anion transmembrane transport;regulation of mitochondrion degradation;regulation of anion transmembrane transport;	nucleus;mitochondrion;mitochondrial outer membrane;mitochondrial inner membrane;plasma membrane;membrane;mitochondrial nucleoid;myelin sheath;pore complex;extracellular exosome;	2.817	3.199	2.315	2.695	2.496	2.581	2.75	2.685	0.559	0.645	0.439	0.686
O75475	PSIP1	PC4 and SFRS1-interacting protein	mRNA 5'-splice site recognition;transcription, DNA-templated;regulation of transcription, DNA-templated;response to oxidative stress;response to heat;viral process;positive regulation of transcription from RNA polymerase II promoter;establishment of integrated proviral latency;	nucleus;nucleoplasm;nuclear heterochromatin;cytosol;nuclear periphery;transcriptionally active chromatin;nucleolus;	2.892	3.124	3.578	3.686	2.881	2.939	3.254	3.165	-0.784	-0.753	-1.497	-1.371
O43684	BUB3	Mitotic checkpoint protein BUB3	mitotic sister chromatid segregation;mitotic cell cycle;mitotic spindle assembly checkpoint;small GTPase mediated signal transduction;attachment of spindle microtubules to kinetochore;anaphase-promoting complex-dependent proteasomal ubiquitin-dependent protein catabolic process;cell division;meiotic cell cycle;negative regulation of ubiquitin-protein ligase activity involved in mitotic cell cycle…	kinetochore;condensed chromosome kinetochore;nucleoplasm;cytosol;	3.736	3.763	3.388	3.415	2.85	3.114	3.664	3.475	-0.725	-0.585	-0.867	-0.666
Q13435	SF3B2	Splicing factor 3B subunit 2	mRNA splicing, via spliceosome;mRNA processing;RNA splicing;gene expression;viral process;	nucleoplasm;spliceosomal complex;U12-type spliceosomal complex;catalytic step 2 spliceosome;	2.313	2.419	3.518	3.655	2.224	2.277	2.784	2.596	-0.313	-0.26	-0.98	-0.903
P35998	PSMC2	26S proteasome regulatory subunit 7	G1/S transition of mitotic cell cycle;protein polyubiquitination;mitotic cell cycle;osteoblast differentiation;stimulatory C-type lectin receptor signaling pathway;antigen processing and presentation of peptide antigen via MHC class I;antigen processing and presentation of exogenous peptide antigen via MHC class I, TAP-dependent;ubiquitin-dependent protein catabolic process;regulation of cellular…	proteasome complex;cytoplasmic mRNA processing body;nucleus;nucleoplasm;cytoplasm;cytosol;proteasome regulatory particle, base subcomplex;membrane;proteasome accessory complex;nuclear proteasome complex;cytosolic proteasome complex;	2.791	3.006	2.488	2.679	2.258	2.267	3.324	3.053	-0.715	-0.633	-0.834	-0.533
P29692	EEF1D	Elongation factor 1-delta	transcription, DNA-templated;regulation of transcription, DNA-templated;translation;translational elongation;signal transduction;mRNA transcription;gene expression;regulation of cell death;positive regulation of I-kappaB kinase/NF-kappaB signaling;cellular protein metabolic process;cellular response to ionizing radiation;	nucleus;nucleolus;cytoplasm;cytosol;eukaryotic translation elongation factor 1 complex;nucleus;endoplasmic reticulum;	3.278	3.466	2.776	2.795	2.843	2.987	3.83	3.699	-1.112	-1.024	-1.495	-1.474
P62081	RPS7	40S ribosomal protein S7	nuclear-transcribed mRNA catabolic process, nonsense-mediated decay;neural tube closure;rRNA processing;translation;translational initiation;translational elongation;translational termination;SRP-dependent cotranslational protein targeting to membrane;gene expression;viral process;viral life cycle;viral transcription;cell differentiation;ribosomal small subunit biogenesis;cellular protein metabol…	nucleus;nucleolus;cytoplasm;microtubule organizing center;cytosol;ribosome;focal adhesion;membrane;cytosolic small ribosomal subunit;ribonucleoprotein complex;90S preribosome;small-subunit processome;extracellular exosome;	2.634	2.778	4.321	4.561	2.605	2.695	2.938	2.865	-0.368	-0.358	-0.764	-0.548
Q8IX12	CCAR1	Cell division cycle and apoptosis regulator protein 1	mRNA splicing, via spliceosome;transcription, DNA-templated;regulation of transcription, DNA-templated;apoptotic process;cell cycle;positive regulation of cell proliferation;RNA splicing;gene expression;positive regulation of cell migration;negative regulation of nucleic acid-templated transcription;	nucleoplasm;perinuclear region of cytoplasm;	2.568	2.674	2.897	3.006	2.486	2.556	2.953	2.829	-0.596	-0.527	-1.285	-1.114
Q9HB71	CACYBP	Calcyclin-binding protein	aging;positive regulation of DNA replication;cardiac muscle cell differentiation;response to growth hormone;negative regulation of cell death;cellular response to calcium ion;	nuclear envelope lumen;nucleoplasm;cytoplasm;beta-catenin destruction complex;neuron projection;cell body;extracellular exosome;	3.651	3.864	3.383	3.542	3.2	3.217	3.758	3.728	-1.059	-1.003	-1.554	-1.293
A1L020	MEX3A	RNA-binding protein MEX3A		cytoplasmic mRNA processing body;nucleus;	3.597	3.817	3.318	3.476	2.634	2.753	3.437	3.348	-0.826	-0.737	-0.981	-0.792
P50395	GDI2	Rab GDP dissociation inhibitor beta	signal transduction;small GTPase mediated signal transduction;protein transport;vesicle-mediated transport;positive regulation of GTPase activity;regulation of small GTPase mediated signal transduction;	cytoplasm;Golgi apparatus;cytosol;focal adhesion;membrane;vesicle;myelin sheath;extracellular exosome;	3.144	3.42	2.883	3.114	2.638	2.738	3.531	3.483	-0.927	-0.828	-1.294	-1.066
P51610	HCFC1	Host cell factor 1	negative regulation of transcription from RNA polymerase II promoter;chromatin organization;regulation of transcription, DNA-templated;transcription from RNA polymerase II promoter;organelle organization;mitochondrion organization;cell cycle;positive regulation of gene expression;release from viral latency;regulation of protein complex assembly;histone H4-K5 acetylation;histone H4-K8 acetylation;…	histone acetyltransferase complex;nucleus;nucleoplasm;cytoplasm;mitochondrion;membrane;axon;dendrite;neuronal cell body;Set1C/COMPASS complex;MLL5-L complex;MLL1 complex;Ada2/Gcn5/Ada3 transcription activator complex;SAGA-type complex;	3.216	3.339	3.183	3.368	2.635	2.76	3.232	3.174	-0.47	-0.407	-0.639	-0.532
P07305	H1F0	Histone H1.0	apoptotic DNA fragmentation;nucleosome assembly;apoptotic process;cellular component disassembly involved in execution phase of apoptosis;programmed cell death;	nucleosome;nuclear chromatin;nucleus;nucleoplasm;nuclear euchromatin;Golgi apparatus;actin cytoskeleton;	0.557	0.642	3.915	4.096	0.642	0.724	0.748	0.519	0.312	0.391	-0.254	-0.251
Q7KZ85	SUPT6H	Transcription elongation factor SPT6	chromatin remodeling;transcription, DNA-templated;regulation of transcription, DNA-templated;mRNA processing;RNA splicing;regulation of mRNA export from nucleus;viral process;positive regulation of transcription elongation from RNA polymerase II promoter;regulation of isotype switching;regulation of mRNA processing;mRNA transport;regulation of muscle cell differentiation;negative regulation of hi…	nucleus;	2.67	2.845	3.206	3.405	2.516	2.5	2.855	2.679	-0.142	-0.158	-0.794	-0.576
Q5BJF6	ODF2	Outer dense fiber protein 2	G2/M transition of mitotic cell cycle;mitotic cell cycle;organelle organization;multicellular organismal development;spermatid development;regulation of cilium assembly;	spindle pole;outer dense fiber;nucleus;centrosome;centriole;cytosol;microtubule;ciliary basal body;primary cilium;primary cilium;	3.718	3.82	2.955	2.985	2.759	2.871	3.18	2.833	-0.151	-0.128	-0.527	-0.191
P55011	SLC12A2	Solute carrier family 12 member 2	transport;ion transport;cell volume homeostasis;potassium ion import;ammonium transport;transepithelial chloride transport;multicellular organism growth;sodium ion transmembrane transport;detection of mechanical stimulus involved in sensory perception of sound;chloride ion homeostasis;potassium ion homeostasis;sodium ion homeostasis;transmembrane transport;branching involved in mammary gland duct…	plasma membrane;integral component of plasma membrane;membrane;basolateral plasma membrane;apical plasma membrane;extracellular exosome;extracellular vesicle;	2.733	2.808	2.099	2.248	2.145	2.299	2.84	2.715	-0.379	-0.317	-0.782	-0.613
P18031	PTPN1	Tyrosine-protein phosphatase non-receptor type 1	protein dephosphorylation;activation of signaling protein activity involved in unfolded protein response;activation of JUN kinase activity;blood coagulation;insulin receptor signaling pathway;regulation of signal transduction;cytokine-mediated signaling pathway;regulation of endocytosis;platelet activation;negative regulation of vascular endothelial growth factor receptor signaling pathway;endopl…	early endosome;endoplasmic reticulum;cytosol;cytoplasmic vesicle;sorting endosome;cytoplasmic side of endoplasmic reticulum membrane;plasma membrane;	3.731	3.924	3.076	3.17	3.015	3.119	3.294	3.156	0.013	0.066	-0.128	0.051
Q9UKE5	TNIK	TRAF2 and NCK-interacting protein kinase	MAPK cascade;positive regulation of protein phosphorylation;positive regulation of defense response to virus by host;protein phosphorylation;cytoskeleton organization;activation of JNKK activity;regulation of mitotic cell cycle;Wnt signaling pathway;microvillus assembly;stress-activated protein kinase signaling cascade;actin cytoskeleton reorganization;intracellular signal transduction;regulation…	nucleus;nucleoplasm;cytoplasm;cytoskeleton;apical plasma membrane;recycling endosome;extracellular exosome;	3.043	3.165	2.838	2.662	2.363	2.516	3.249	3.312	-0.84	-0.735	-1.221	-1.069
Q9P0K7	RAI14	Ankycorbin		nucleus;nucleoplasm;cytoplasm;mitochondrion;cell cortex;actin cytoskeleton;	2.819	3.225	2.396	2.644	2.42	2.508	3.626	3.552	-1.574	-1.472	-2.373	-1.938
Q49A88	CCDC14	Coiled-coil domain-containing protein 14	substantia nigra development;	centrosome;	4.51	4.671	3.023	3.106	3.397	3.448	3.592	3.328	0.11	0.057	0.032	0.225
O95453	PARN	Poly(A)-specific ribonuclease PARN	nuclear-transcribed mRNA catabolic process, nonsense-mediated decay;nuclear-transcribed mRNA catabolic process, deadenylation-dependent decay;nuclear-transcribed mRNA poly(A) tail shortening;female gamete generation;RNA modification;gene expression;nucleic acid phosphodiester bond hydrolysis;RNA phosphodiester bond hydrolysis, exonucleolytic;	nucleus;nucleolus;cytoplasm;cytosol;	3.006	3.225	3.653	3.827	2.655	2.702	3.055	2.956	-0.532	-0.467	-0.887	-0.651
P62820	RAB1A	Ras-related protein Rab-1A	autophagosome assembly;mitotic cell cycle;intracellular protein transport;ER to Golgi vesicle-mediated transport;endocytosis;autophagy;Golgi organization;vesicle-mediated transport;cell migration;virion assembly;growth hormone secretion;melanosome transport;Rab protein signal transduction;substrate adhesion-dependent cell spreading;defense response to bacterium;vesicle transport along microtubule…	Golgi membrane;early endosome;endoplasmic reticulum membrane;Golgi apparatus;cytosol;melanosome;extracellular exosome;	2.811	3.119	2.405	2.598	2.665	2.722	3.265	3.235	-0.334	-0.257	-0.54	-0.305
Q6PGP7	TTC37	Tetratricopeptide repeat protein 37		nucleus;nucleoplasm;cytoplasm;transcriptionally active chromatin;Ski complex;	3.013	3.406	3.357	3.715	2.662	2.753	3.362	3.327	-0.737	-0.775	-1.02	-0.659
Q9UMS4	PRPF19	Pre-mRNA-processing factor 19	protein polyubiquitination;spliceosomal tri-snRNP complex assembly;spliceosomal complex assembly;generation of catalytic spliceosome for first transesterification step;mRNA splicing, via spliceosome;inner cell mass cell proliferation;double-strand break repair via nonhomologous end joining;RNA splicing;lipid biosynthetic process;gene expression;proteasomal protein catabolic process;cellular prote…	Prp19 complex;nucleus;nucleoplasm;cytoplasm;lipid particle;spindle;membrane;nuclear speck;site of double-strand break;U2-type catalytic step 1 spliceosome;catalytic step 2 spliceosome;DNA replication factor A complex;	2.516	2.713	2.963	3.237	2.628	2.644	3.176	3.099	-0.112	-0.057	-0.34	-0.123
O95373	IPO7	Importin-7	protein import into nucleus;signal transduction;viral process;innate immune response;regulation of catalytic activity;	nuclear pore;nucleoplasm;cytoplasm;membrane;	3.563	3.875	3.258	3.535	2.787	2.907	3.692	3.459	-0.844	-0.757	-1.104	-0.8
Q99729-2	HNRNPAB	Isoform 2 of Heterogeneous nuclear ribonucleoprotein A/B	negative regulation of transcription from RNA polymerase II promoter;epithelial to mesenchymal transition;positive regulation of transcription, DNA-templated;	nucleus;nucleoplasm;cytoplasm;ribonucleoprotein complex;RNA polymerase II transcription factor complex;	2.888	3.055	3.629	3.848	2.807	2.802	3.194	3.159	-0.659	-0.578	-1.197	-0.985
Q9UGR2	ZC3H7B	Zinc finger CCCH domain-containing protein 7B	viral process;	nucleus;	3.407	3.433	3.57	3.718	2.803	2.849	3.257	3.146	-0.663	-0.663	-1.023	-0.701
Q8TDM6	DLG5	Disks large homolog 5	protein complex assembly;signal transduction;negative regulation of cell proliferation;single organismal cell-cell adhesion;polarized epithelial cell differentiation;midbrain development;intracellular signal transduction;regulation of apoptotic process;apical protein localization;zonula adherens assembly;establishment or maintenance of epithelial cell apical/basal polarity;epithelial tube branchi…	cytoplasm;plasma membrane;cell-cell adherens junction;	3	2.758	2.554	2.223	2.179	2.418	2.659	2.266	-0.197	-0.047	-0.248	-0.232
Q86TB9	PATL1	Protein PAT1 homolog 1	nuclear-transcribed mRNA catabolic process, deadenylation-dependent decay;deadenylation-dependent decapping of nuclear-transcribed mRNA;gene expression;cytoplasmic mRNA processing body assembly;exonucleolytic nuclear-transcribed mRNA catabolic process involved in deadenylation-dependent decay;	cytoplasmic mRNA processing body;cytosol;PML body;nuclear speck;intracellular membrane-bounded organelle;CCR4-NOT complex;	3.869	4.038	3.622	3.751	3.119	3.228	3.875	3.671	-0.927	-0.864	-1.319	-1.026
Q96TC7	RMDN3	Regulator of microtubule dynamics protein 3	cellular calcium ion homeostasis;apoptotic process;cell differentiation;	spindle pole;nucleus;mitochondrion;mitochondrial outer membrane;microtubule;integral component of membrane;	3.744	4.275	2.843	3.132	2.92	2.986	2.554	2.498	0.575	0.583	0.356	0.835
J3KTE4	RPL19	Ribosomal protein L19	translation;	nucleolus;cytoplasm;ribosome;	1.477	1.48	3.738	3.646	1.493	1.676	1.842	1.472	-0.014	0.131	-0.531	-0.561
O75494	SRSF10	Serine/arginine-rich splicing factor 10	spliceosomal tri-snRNP complex assembly;RNA splicing, via transesterification reactions;mRNA splicing, via spliceosome;regulation of transcription, DNA-templated;mRNA splice site selection;mRNA export from nucleus;cytoplasmic transport;negative regulation of mRNA splicing, via spliceosome;	nucleus;nucleoplasm;cytoplasm;nuclear speck;	2.783	2.747	1.938	1.866	2.129	2.276	2.668	2.388	-0.219	-0.087	-0.3	-0.288
O60343	TBC1D4	TBC1 domain family member 4	vesicle-mediated transport;negative regulation of vesicle fusion;cellular response to insulin stimulus;positive regulation of GTPase activity;membrane organization;	cytoplasm;cytoplasmic vesicle membrane;extracellular exosome;	3.413	3.486	3.417	3.544	2.478	2.644	3.46	3.175	-0.712	-0.629	-0.852	-0.616
O14979-2	HNRNPDL	Isoform 2 of Heterogeneous nuclear ribonucleoprotein D-like	transcription, DNA-templated;regulation of transcription, DNA-templated;RNA processing;regulation of gene expression;	nucleus;nucleoplasm;spliceosomal complex;cytoplasm;extracellular exosome;	2.96	3.182	3.472	3.681	2.926	2.932	3.325	3.334	-0.543	-0.532	-1.173	-0.888
Q9NUQ3	TXLNG	Gamma-taxilin	transcription, DNA-templated;regulation of transcription, DNA-templated;cell cycle;regulation of cell cycle process;regulation of bone mineralization;regulation of cell cycle;	cytosol;nuclear membrane;	3.569	3.693	3.893	3.829	2.591	2.691	3.333	3.068	-0.637	-0.656	-0.855	-0.716
P62906	RPL10A	60S ribosomal protein L10a	nuclear-transcribed mRNA catabolic process, nonsense-mediated decay;translation;translational initiation;translational elongation;translational termination;SRP-dependent cotranslational protein targeting to membrane;anatomical structure morphogenesis;gene expression;viral process;viral life cycle;viral transcription;cellular protein metabolic process;	nucleus;nucleolus;cytoplasm;mitochondrion;cytosol;focal adhesion;membrane;cytosolic large ribosomal subunit;extracellular exosome;	2.508	2.736	4.137	4.356	2.825	2.823	2.946	2.873	-0.286	-0.252	-0.996	-0.811
Q6WCQ1	MPRIP	Myosin phosphatase Rho-interacting protein		cytoplasm;focal adhesion;actin cytoskeleton;	3.033	2.995	2.739	2.615	2.436	2.602	3.408	3.218	-1.195	-1.12	-1.646	-1.439
E7ESA6	PTK2	Focal adhesion kinase 1	cytoskeleton organization;cell adhesion;signal complex assembly;epidermal growth factor receptor signaling pathway;cell migration;cell differentiation;peptidyl-tyrosine autophosphorylation;innate immune response;	cytoplasm;cytoskeleton;focal adhesion;extrinsic component of cytoplasmic side of plasma membrane;	3.466	3.802	3.042	3.18	2.793	3.007	3.774	3.635	-1.099	-0.982	-1.274	-1.108
Q9H0H5	RACGAP1	Rac GTPase-activating protein 1	mitotic cytokinesis;actomyosin contractile ring assembly;microtubule-based movement;small GTPase mediated signal transduction;spermatogenesis;neuroblast proliferation;blood coagulation;sulfate transport;embryo development;antigen processing and presentation of exogenous peptide antigen via MHC class II;positive regulation of cytokinesis;positive regulation of GTPase activity;regulation of small G…	acrosomal vesicle;nucleus;nucleoplasm;cytosol;microtubule;midbody;extrinsic component of cytoplasmic side of plasma membrane;cleavage furrow;spindle midzone;extracellular exosome;mitotic spindle;centralspindlin complex;	3.17	3.391	3.428	3.444	3.003	3.14	3.428	3.335	-0.893	-0.796	-1.474	-1.281
O75165	DNAJC13	DnaJ homolog subfamily C member 13	osteoblast differentiation;endosome organization;protein transport;regulation of early endosome to recycling endosome transport;regulation of early endosome to late endosome transport;	lysosomal membrane;endosome membrane;membrane;early endosome membrane;extracellular exosome;WASH complex;	3.135	3.563	2.665	2.964	2.667	2.773	3.61	3.504	-0.876	-0.764	-1.016	-0.666
O96028	NSD2	Histone-lysine N-methyltransferase NSD2	negative regulation of transcription from RNA polymerase II promoter;membranous septum morphogenesis;atrial septum primum morphogenesis;atrial septum secundum morphogenesis;chromatin organization;transcription, DNA-templated;anatomical structure morphogenesis;histone H3-K36 methylation;histone H4-K20 methylation;positive regulation of isotype switching to IgA isotypes;bone development;regulation …	nucleus;nucleoplasm;chromosome;cytoplasm;	2.763	2.905	3.235	3.401	2.531	2.54	2.99	2.897	-0.201	-0.216	-0.629	-0.46
F8W6L3	KLC1	Kinesin light chain 1	metabolic process;	kinesin complex;	3.472	3.736	3.162	3.333	3.078	3.116	3.889	3.651	-1.257	-1.19	-1.761	-1.506
Q9NRX1	PNO1	RNA-binding protein PNO1		nucleus;nucleolus;	2.968	3.081	4.291	4.355	2.671	2.706	3.146	3.106	-0.433	-0.253	-0.757	-0.563
C9J5X1	IGF1R	Tyrosine-protein kinase receptor	transmembrane receptor protein tyrosine kinase signaling pathway;peptidyl-tyrosine phosphorylation;protein autophosphorylation;	plasma membrane;integral component of membrane;	2.685	2.506	2.693	2.702	2.526	2.57	2.784	2.349	-0.387	-0.269	-0.549	-0.435
Q9H6R4	NOL6	Nucleolar protein 6	rRNA processing;tRNA export from nucleus;	condensed nuclear chromosome;nucleus;nucleolus;mitochondrion;small-subunit processome;CURI complex;UTP-C complex;	2.979	3.253	3.498	3.723	2.582	2.666	3.095	2.752	-0.263	-0.193	-0.598	-0.324
Q16891	IMMT	MICOS complex subunit MIC60	cristae formation;mitochondrial calcium ion homeostasis;	mitochondrion;mitochondrial inner membrane;membrane;myelin sheath;MICOS complex;	2.566	2.528	1.857	1.845	1.96	1.946	2.497	2.355	0.371	0.493	0.579	0.483
Q8IWC1	MAP7D3	MAP7 domain-containing protein 3	microtubule cytoskeleton organization;microtubule polymerization;	nucleus;nucleoplasm;cytoplasm;centrosome;spindle;actin cytoskeleton;microtubule cytoskeleton;membrane;	3.837	3.938	3.713	3.804	3.056	3.059	3.209	3.151	-0.182	-0.151	-0.711	-0.589
Q86X55	CARM1	Histone-arginine methyltransferase CARM1	regulation of growth plate cartilage chondrocyte proliferation;chromatin organization;transcription, DNA-templated;regulation of transcription, DNA-templated;aging;positive regulation of cell proliferation;pathogenesis;viral process;histone methylation;peptidyl-arginine methylation, to asymmetrical-dimethyl arginine;intracellular estrogen receptor signaling pathway;negative regulation of protein …	nucleus;nucleoplasm;cytoplasm;cytosol;	2.985	3.402	2.359	2.578	2.708	2.805	3.713	3.596	-0.788	-0.78	-0.919	-0.562
E7EW05	SDAD1	Protein SDA1 homolog	ribosomal large subunit export from nucleus;actin cytoskeleton organization;ribosomal large subunit biogenesis;	nucleus;nucleolus;	2.291	2.425	4.274	4.375	2.322	2.399	2.627	2.558	-0.324	-0.242	-0.534	-0.546
Q8IWR0	ZC3H7A	Zinc finger CCCH domain-containing protein 7A		nucleus;	3.658	3.739	3.278	3.49	2.731	2.892	3.44	3.466	-0.59	-0.473	-0.926	-0.743
O15118	NPC1	Niemann-Pick C1 protein	protein glycosylation;endocytosis;autophagy;lysosomal transport;signal transduction;adult walking behavior;cholesterol metabolic process;bile acid metabolic process;negative regulation of macroautophagy;cholesterol transport;membrane raft organization;cholesterol efflux;response to drug;cholesterol homeostasis;response to cadmium ion;viral entry into host cell;negative regulation of cell death;ce…	extracellular region;nuclear envelope;lysosome;lysosomal membrane;endoplasmic reticulum;Golgi apparatus;integral component of plasma membrane;membrane;integral component of membrane;late endosome membrane;membrane raft;perinuclear region of cytoplasm;extracellular exosome;	2.945	3.205	2.776	3.17	2.569	2.712	2.888	2.766	-0.057	0.05	-0.304	-0.132
Q9UKA9	PTBP2	Polypyrimidine tract-binding protein 2	mRNA splice site selection;negative regulation of RNA splicing;regulation of neural precursor cell proliferation;	spliceosomal complex;	2.756	2.883	4.155	4.446	2.706	2.718	2.939	2.903	-0.199	-0.136	-0.835	-0.571
P30626	SRI	Sorcin	action potential;proteolysis;transport;calcium ion transport;intracellular sequestering of iron ion;regulation of striated muscle contraction;signal transduction;heart development;muscle organ development;regulation of heart contraction;negative regulation of heart rate;regulation of cell communication by electrical coupling;regulation of release of sequestered calcium ion into cytosol by sarcopl…	nucleoplasm;cytoplasm;mitochondrion;endoplasmic reticulum membrane;smooth endoplasmic reticulum;cytosol;membrane;sarcoplasmic reticulum;Z disc;T-tubule;sarcoplasmic reticulum membrane;axon terminus;dendritic spine neck;extracellular exosome;chromaffin granule membrane;	3.709	3.823	2.882	3.054	3.023	3.118	3.88	3.739	-0.931	-0.86	-1.022	-0.846
Q07864	POLE	DNA polymerase epsilon catalytic subunit A	G1/S transition of mitotic cell cycle;mitotic cell cycle;telomere maintenance via recombination;telomere maintenance;DNA synthesis involved in DNA repair;in utero embryonic development;DNA replication;DNA replication initiation;DNA repair;transcription-coupled nucleotide-excision repair;base-excision repair, gap-filling;nucleotide-excision repair;nucleotide-excision repair, DNA gap filling;telome…	nucleus;nucleoplasm;cytoplasm;plasma membrane;epsilon DNA polymerase complex;	3.02	3.355	3.129	3.486	2.643	2.589	3.237	3.066	-0.532	-0.511	-0.757	-0.432
Q14108	SCARB2	Lysosome membrane protein 2	protein targeting to lysosome;cell adhesion;	lysosomal membrane;focal adhesion;membrane;integral component of membrane;lysosomal lumen;extracellular exosome;	2.805	3.119	2.219	2.505	2.669	2.856	3.097	3.067	-0.457	-0.34	-0.596	-0.278
Q9Y295	DRG1	Developmentally-regulated GTP-binding protein 1	transcription, DNA-templated;multicellular organismal development;	cytoplasm;polysome;membrane;	2.881	3.067	3.486	3.931	2.696	2.814	3.223	3.044	-0.653	-0.514	-1.163	-0.907
P45880	VDAC2	Voltage-dependent anion-selective channel protein 2	anion transport;negative regulation of protein polymerization;transmembrane transport;regulation of anion transmembrane transport;negative regulation of intrinsic apoptotic signaling pathway;	nucleus;mitochondrion;mitochondrial outer membrane;mitochondrial inner membrane;mitochondrial nucleoid;myelin sheath;membrane raft;pore complex;extracellular exosome;	2.581	2.84	2.199	2.428	2.442	2.465	2.809	2.625	0.603	0.666	0.508	0.698
P55209	NAP1L1	Nucleosome assembly protein 1-like 1	DNA replication;nucleosome assembly;positive regulation of cell proliferation;Schwann cell proliferation;cellular response to peptide hormone stimulus;	nucleus;membrane;melanosome;neuron projection;	3.18	3.485	3.232	3.589	2.959	3.055	3.565	3.407	-0.858	-0.786	-1.471	-1.086
O94986	CEP152	Centrosomal protein of 152 kDa	G2/M transition of mitotic cell cycle;mitotic cell cycle;organelle organization;centriole replication;cell projection organization;centrosome duplication;de novo centriole assembly;	nucleoplasm;centrosome;cytosol;deuterosome;	3.152	3.395	2.02	2.266	2.497	2.517	3.13	2.958	-0.224	-0.171	-0.294	-0.092
Q14847	LASP1	LIM and SH3 domain protein 1	ion transport;positive regulation of signal transduction;ion transmembrane transport;	focal adhesion;cortical actin cytoskeleton;extracellular exosome;	3.595	3.676	2.93	3.087	2.717	2.877	3.445	3.305	-0.62	-0.504	-0.717	-0.731
Q5VZL5	ZMYM4	Zinc finger MYM-type protein 4	cytoskeleton organization;multicellular organismal development;regulation of cell morphogenesis;	nucleus;nucleoplasm;nucleolus;cytoplasm;	3.271	3.291	3.198	3.409	2.604	2.677	3.107	2.904	-0.176	-0.118	-0.332	-0.241
P04075	ALDOA	Fructose-bisphosphate aldolase A	platelet degranulation;carbohydrate metabolic process;fructose metabolic process;glucose metabolic process;gluconeogenesis;glycolytic process;ATP biosynthetic process;striated muscle contraction;actin filament organization;blood coagulation;regulation of cell shape;platelet activation;fructose 1,6-bisphosphate metabolic process;small molecule metabolic process;muscle cell cellular homeostasis;pro…	extracellular region;extracellular space;nucleus;cytosol;actin cytoskeleton;membrane;platelet alpha granule lumen;M band;I band;extracellular exosome;	3.098	3.228	2.435	2.364	2.7	2.811	3.432	3.213	-0.808	-0.708	-1.183	-1.08
Q15758	SLC1A5	Neutral amino acid transporter B(0)	ion transport;dicarboxylic acid transport;amino acid transport;glutamine transport;neutral amino acid transport;viral entry into host cell;transmembrane transport;	Golgi apparatus;plasma membrane;integral component of plasma membrane;membrane;melanosome;extracellular exosome;	2.836	2.949	1.152	1.533	2.733	2.908	2.892	2.618	0.102	0.126	-0.407	-0.048
Q5D862	FLG2	Filaggrin-2	establishment of skin barrier;	nucleus;cytoplasm;extracellular exosome;	-0.019	-0.671	-0.564	-1.457	-0.813	-1.184	0.215	-0.202	0.606	0.299	0.646	0.287
Q9BSJ8	ESYT1	Extended synaptotagmin-1	lipid transport;	endoplasmic reticulum;plasma membrane;membrane;integral component of endoplasmic reticulum membrane;organelle membrane contact site;	3.105	3.244	2.648	2.893	2.599	2.606	3.217	3.116	-0.561	-0.498	-0.892	-0.602
P04920	SLC4A2	Anion exchange protein 2	ion transport;anion transport;bicarbonate transport;regulation of intracellular pH;transmembrane transport;chloride transmembrane transport;	plasma membrane;integral component of plasma membrane;focal adhesion;membrane;basolateral plasma membrane;	3.043	3.283	2.834	3.094	2.948	2.939	3.1	3.017	-0.162	-0.193	-0.484	-0.293
P23470	PTPRG	Receptor-type tyrosine-protein phosphatase gamma	transmembrane receptor protein tyrosine kinase signaling pathway;negative regulation of epithelial cell migration;peptidyl-tyrosine dephosphorylation;toxin transport;regulation of homophilic cell adhesion;	integral component of plasma membrane;extracellular exosome;	2.94	3.211	2.861	3.179	2.663	2.702	3.127	3.028	-0.395	-0.306	-0.688	-0.416
Q6P1J9	CDC73	Parafibromin	negative regulation of transcription from RNA polymerase II promoter;endodermal cell fate commitment;transcription elongation from RNA polymerase II promoter;mRNA polyadenylation;cell cycle;negative regulation of cell proliferation;histone monoubiquitination;Wnt signaling pathway;stem cell maintenance;positive regulation of Wnt signaling pathway;positive regulation of mRNA 3'-end processing;prote…	nucleus;nucleoplasm;Cdc73/Paf1 complex;	2.927	3.158	3.11	3.321	2.656	2.757	3.354	3.2	-0.505	-0.494	-1.104	-0.744
F8WAJ0	DDX31	RNA helicase	RNA secondary structure unwinding;	nucleolus;Golgi apparatus;intracellular membrane-bounded organelle;	2.856	3.143	3.346	3.414	2.521	2.6	2.739	2.682	-0.095	-0.091	-0.697	-0.371
P19525	EIF2AK2	Interferon-induced, double-stranded RNA-activated protein kinase	activation of MAPKK activity;positive regulation of cytokine production;transcription, DNA-templated;translation;protein phosphorylation;negative regulation of cell proliferation;response to virus;regulation of translational initiation by eIF2 alpha phosphorylation;negative regulation of translation;peptidyl-tyrosine phosphorylation;modulation by virus of host morphology or physiology;modulation …	nucleus;cytoplasm;cytosol;ribosome;membrane;perinuclear region of cytoplasm;	3.005	3.26	3.44	3.744	2.81	2.867	3.198	3.17	-0.681	-0.635	-1.206	-0.912
O75821	EIF3G	Eukaryotic translation initiation factor 3 subunit G	formation of translation preinitiation complex;translation;translational initiation;regulation of translational initiation;gene expression;cellular protein metabolic process;	cytoplasm;cytosol;eukaryotic translation initiation factor 3 complex;eukaryotic 43S preinitiation complex;eukaryotic 48S preinitiation complex;perinuclear region of cytoplasm;nucleus;	3.057	3.236	3.358	3.692	2.555	2.664	3.418	3.308	-0.855	-0.816	-1.21	-1.002
O75487	GPC4	Glypican-4	retinoid metabolic process;carbohydrate metabolic process;glycosaminoglycan biosynthetic process;glycosaminoglycan catabolic process;phototransduction, visible light;cell proliferation;anatomical structure morphogenesis;glycosaminoglycan metabolic process;chondroitin sulfate metabolic process;small molecule metabolic process;	proteinaceous extracellular matrix;extracellular space;nucleus;Golgi lumen;plasma membrane;integral component of plasma membrane;external side of plasma membrane;anchored component of membrane;lysosomal lumen;extracellular exosome;	2.682	2.928	2.555	2.853	2.586	2.739	3.045	2.932	-0.377	-0.209	-0.774	-0.518
Q06124	PTPN11	Tyrosine-protein phosphatase non-receptor type 11	DNA damage checkpoint;activation of MAPK activity;triglyceride metabolic process;epidermal growth factor receptor signaling pathway;integrin-mediated signaling pathway;axon guidance;brain development;heart development;blood coagulation;insulin receptor signaling pathway;fibroblast growth factor receptor signaling pathway;hormone-mediated signaling pathway;cytokine-mediated signaling pathway;plate…	nucleus;cytoplasm;mitochondrion;cytosol;protein complex;	3.171	3.513	2.811	2.906	2.57	2.605	3.3	3.126	-0.812	-0.679	-1.022	-0.97
P25054	APC	Adenomatous polyposis coli protein	mitotic cytokinesis;kidney development;hair follicle development;protein complex assembly;apoptotic process;cellular component disassembly involved in execution phase of apoptosis;cellular response to DNA damage stimulus;negative regulation of microtubule depolymerization;cell cycle arrest;metaphase/anaphase transition of mitotic cell cycle;mitotic spindle assembly checkpoint;cell adhesion;axonog…	kinetochore;nucleus;nucleoplasm;cytoplasm;centrosome;cytosol;cytoplasmic microtubule;plasma membrane;bicellular tight junction;lateral plasma membrane;catenin complex;lamellipodium;beta-catenin destruction complex;ruffle membrane;microtubule plus-end;axonal growth cone;plasma membrane;cell-cell adherens junction;	3.424	3.276	2.971	2.811	2.453	3	3.234	2.809	-0.182	0.008	-0.134	-0.255
Q9P2R3	ANKFY1	Rabankyrin-5	endocytosis;endosome localization;endosomal vesicle fusion;retrograde transport, endosome to Golgi;positive regulation of pinocytosis;Golgi to lysosome transport;	lysosomal membrane;early endosome;endosome membrane;membrane;macropinosome;extracellular exosome;retromer complex;	3.736	4.034	3.672	3.985	3.137	3.266	3.722	3.609	-0.743	-0.66	-1.109	-0.838
Q9H7E2-3	TDRD3	Isoform 3 of Tudor domain-containing protein 3	chromatin modification;regulation of nucleic acid-templated transcription;	nucleus;cytoplasm;exon-exon junction complex;	3.429	3.33	3.118	3.332	2.57	2.748	3.502	3	-0.47	-0.328	-0.388	-0.613
O00267	SUPT5H	Transcription elongation factor SPT5	negative regulation of transcription from RNA polymerase II promoter;chromatin remodeling;DNA-templated transcription, elongation;transcription from RNA polymerase II promoter;transcription elongation from RNA polymerase II promoter;7-methylguanosine mRNA capping;cell cycle;response to organic substance;gene expression;viral process;positive regulation of macroautophagy;negative regulation of DNA…	nucleus;nucleoplasm;DSIF complex;	2.821	2.791	2.599	2.568	2.021	2.181	2.536	2.306	-0.239	-0.095	-0.397	-0.445
Q13151	HNRNPA0	Heterogeneous nuclear ribonucleoprotein A0	mRNA splicing, via spliceosome;mRNA processing;inflammatory response;RNA splicing;gene expression;response to lipopolysaccharide;3'-UTR-mediated mRNA stabilization;	nucleus;nucleoplasm;ribonucleoprotein complex;	2.622	2.724	4.087	4.168	2.548	2.605	2.912	2.795	-0.182	-0.187	-0.699	-0.67
Q9BZI7	UPF3B	Regulator of nonsense transcripts 3B	nuclear-transcribed mRNA catabolic process, nonsense-mediated decay;mRNA splicing, via spliceosome;transcription from RNA polymerase II promoter;termination of RNA polymerase II transcription;mRNA export from nucleus;RNA splicing;gene expression;mRNA 3'-end processing;positive regulation of translation;	nucleus;nucleoplasm;cytoplasm;cytosol;exon-exon junction complex;exon-exon junction complex;	3.38	3.565	3.306	3.576	2.944	2.998	3.63	3.531	-0.958	-0.929	-1.591	-1.345
P23921	RRM1	Ribonucleoside-diphosphate reductase large subunit	mitotic cell cycle;pyrimidine nucleobase metabolic process;DNA replication;male gonad development;deoxyribonucleotide biosynthetic process;response to ionizing radiation;nucleobase-containing small molecule interconversion;cell proliferation in forebrain;small molecule metabolic process;protein heterotetramerization;nucleobase-containing small molecule metabolic process;oxidation-reduction proces…	nuclear envelope;nucleoplasm;cytoplasm;cytosol;cell projection;neuronal cell body;extracellular exosome;	2.896	3.183	2.764	2.75	2.234	2.341	3.001	2.739	-0.438	-0.407	-0.555	-0.453
P51148	RAB5C	Ras-related protein Rab-5C	intracellular protein transport;regulation of endocytosis;Rab protein signal transduction;plasma membrane to endosome transport;	lysosomal membrane;early endosome;lipid particle;plasma membrane;endocytic vesicle;early endosome membrane;melanosome;intracellular membrane-bounded organelle;extracellular exosome;	3.85	3.996	2.516	2.819	3.028	3.093	3.529	3.382	-0.264	-0.167	-0.542	-0.285
P50570	DNM2	Dynamin-2	G2/M transition of mitotic cell cycle;G-protein coupled receptor internalization;regulation of transcription, DNA-templated;post-Golgi vesicle-mediated transport;Golgi to plasma membrane transport;endocytosis;receptor-mediated endocytosis;signal transduction;spermatogenesis;response to light stimulus;positive regulation of lamellipodium assembly;antigen processing and presentation of exogenous pe…	Golgi membrane;phagocytic cup;photoreceptor inner segment;nucleus;cytoplasm;endosome;Golgi apparatus;trans-Golgi network;centrosome;cytosol;microtubule;plasma membrane;coated pit;focal adhesion;postsynaptic density;lamellipodium;midbody;endocytic vesicle membrane;ruffle membrane;postsynaptic membrane;clathrin-coated endocytic vesicle;perinuclear region of cytoplasm;extracellular exosome;growth co…	2.851	3.167	2.863	3.144	2.694	2.757	3.402	3.331	-1.068	-0.969	-1.417	-1.097
Q9NPI6	DCP1A	mRNA-decapping enzyme 1A	nuclear-transcribed mRNA catabolic process, nonsense-mediated decay;nuclear-transcribed mRNA catabolic process, deadenylation-dependent decay;gene expression;exonucleolytic nuclear-transcribed mRNA catabolic process involved in deadenylation-dependent decay;	cytoplasmic mRNA processing body;nucleus;cytosol;membrane;	3.305	3.569	3.082	3.402	2.725	2.746	3.569	3.552	-1.154	-0.978	-1.452	-1.201
P18621	RPL17	60S ribosomal protein L17	nuclear-transcribed mRNA catabolic process, nonsense-mediated decay;cytoplasmic translation;translation;translational initiation;translational elongation;translational termination;SRP-dependent cotranslational protein targeting to membrane;gene expression;viral process;viral life cycle;viral transcription;cellular protein metabolic process;	nucleus;cytosol;cytosolic large ribosomal subunit;	2.335	2.487	4.23	4.402	2.348	2.385	2.738	2.619	-0.349	-0.311	-0.902	-0.698
O43823	AKAP8	A-kinase anchor protein 8	mitotic nuclear division;signal transduction;	female pronucleus;nucleus;nucleoplasm;mitochondrion;Golgi apparatus;membrane;nuclear matrix;	3.175	3.315	3.282	3.402	2.656	2.763	3.084	2.994	-0.262	-0.131	-0.756	-0.761
Q9UHX1	PUF60	Poly(U)-binding-splicing factor PUF60	transcription, DNA-templated;regulation of transcription, DNA-templated;mRNA processing;apoptotic process;RNA splicing;	nucleoplasm;mitochondrion;Golgi apparatus;ribonucleoprotein complex;cyclin-dependent protein kinase activating kinase holoenzyme complex;	2.753	2.977	3.958	4.216	2.558	2.644	3.024	2.931	-0.37	-0.309	-0.712	-0.561
P62316	SNRPD2	Small nuclear ribonucleoprotein Sm D2	spliceosomal complex assembly;spliceosomal snRNP assembly;mRNA splicing, via spliceosome;RNA splicing;gene expression;ncRNA metabolic process;	nucleoplasm;spliceosomal complex;U1 snRNP;U4 snRNP;U12-type spliceosomal complex;cytosol;small nuclear ribonucleoprotein complex;methylosome;pICln-Sm protein complex;SMN-Sm protein complex;extracellular exosome;catalytic step 2 spliceosome;	2.695	2.785	3.987	4.177	2.677	2.706	2.87	2.746	-0.243	-0.237	-0.785	-0.65
P42892	ECE1	Endothelin-converting enzyme 1	positive regulation of receptor recycling;regulation of systemic arterial blood pressure by endothelin;heart development;substance P catabolic process;bradykinin catabolic process;calcitonin catabolic process;protein processing;peptide hormone processing;regulation of vasoconstriction;endothelin maturation;hormone catabolic process;embryonic digit morphogenesis;ear development;pharyngeal system d…	lysosomal membrane;endosome;early endosome;plasma membrane;external side of plasma membrane;membrane;integral component of membrane;intrinsic component of endosome membrane;vesicle;Weibel-Palade body;perinuclear region of cytoplasm;extracellular exosome;	2.762	3.039	2.676	2.949	2.589	2.569	3.077	2.94	-0.4	-0.293	-0.741	-0.493
Q9BY44	EIF2A	Eukaryotic translation initiation factor 2A	translational initiation;regulation of translation;protein phosphorylation;positive regulation of signal transduction;SREBP signaling pathway;ribosome assembly;	extracellular space;cytoplasm;eukaryotic translation initiation factor 2 complex;blood microparticle;	3.165	3.271	3.374	3.736	2.857	2.922	3.411	3.383	-0.823	-0.761	-1.002	-0.799
Q9Y5K6	CD2AP	CD2-associated protein	protein complex assembly;substrate-dependent cell migration, cell extension;mitotic nuclear division;signal transduction;vesicle organization;single organismal cell-cell adhesion;negative regulation of transforming growth factor beta1 production;proteasome-mediated ubiquitin-dependent protein catabolic process;regulation of receptor-mediated endocytosis;cell division;positive regulation of protei…	ruffle;nucleolus;cytoplasm;plasma membrane;cell-cell junction;actin cytoskeleton;endocytic vesicle;filamentous actin;perinuclear region of cytoplasm;extracellular exosome;	3.546	3.791	3.098	3.443	3.16	3.215	3.831	3.826	-1.349	-1.241	-1.96	-1.566
Q7L1Q6	BZW1	Basic leucine zipper and W2 domain-containing protein 1	transcription, DNA-templated;regulation of transcription, DNA-templated;	cytoplasm;membrane;	2.943	3.098	3.266	3.497	2.791	2.866	3.461	3.388	-0.657	-0.611	-1.216	-0.891
Q8N684	CPSF7	Cleavage and polyadenylation specificity factor subunit 7	mRNA splicing, via spliceosome;transcription from RNA polymerase II promoter;termination of RNA polymerase II transcription;RNA splicing;gene expression;mRNA 3'-end processing;protein tetramerization;	nucleus;nucleoplasm;mRNA cleavage factor complex;membrane;	2.724	3.006	3.118	3.34	2.696	2.739	3.259	3.219	-0.514	-0.393	-1.099	-0.822
P50402	EMD	Emerin	mitotic cell cycle;muscle contraction;mitotic nuclear envelope disassembly;mitotic nuclear envelope reassembly;muscle organ development;negative regulation of catenin import into nucleus;skeletal muscle cell differentiation;positive regulation of protein export from nucleus;negative regulation of fibroblast proliferation;regulation of canonical Wnt signaling pathway;cellular response to growth fa…	nuclear envelope;nuclear inner membrane;nuclear outer membrane;endoplasmic reticulum;microtubule;membrane;integral component of membrane;nuclear membrane;	4.114	3.985	2.737	2.724	2.873	3.083	3.648	3.167	-0.028	0.052	-0.348	-0.31
Q9NR12	PDLIM7	PDZ and LIM domain protein 7	ossification;receptor-mediated endocytosis;multicellular organismal development;actin cytoskeleton organization;cell differentiation;positive regulation of osteoblast differentiation;	stress fiber;ruffle;nucleus;cytoplasm;focal adhesion;actin cytoskeleton;	3.408	3.475	3.151	3.195	2.804	2.791	3.701	3.487	-1.12	-1	-1.435	-1.377
P62269	RPS18	40S ribosomal protein S18	nuclear-transcribed mRNA catabolic process, nonsense-mediated decay;translation;translational initiation;translational elongation;translational termination;SRP-dependent cotranslational protein targeting to membrane;gene expression;viral process;viral life cycle;viral transcription;cellular protein metabolic process;	nucleus;cytoplasm;cytosol;ribosome;focal adhesion;small ribosomal subunit;membrane;cytosolic small ribosomal subunit;extracellular exosome;	2.576	2.758	3.323	3.522	2.993	3.036	3.584	3.41	-0.128	-0.102	-1.442	-1.155
Q92878	RAD50	DNA repair protein RAD50	regulation of mitotic recombination;telomere maintenance;double-strand break repair via homologous recombination;DNA repair;double-strand break repair;DNA recombination;cellular response to DNA damage stimulus;telomere maintenance via telomerase;reciprocal meiotic recombination;regulation of mitotic cell cycle;viral process;positive regulation of protein autophosphorylation;DNA duplex unwinding;p…	nuclear chromosome, telomeric region;nucleoplasm;membrane;Mre11 complex;site of double-strand break;pronucleus;	2.813	2.901	2.714	2.859	2.274	2.414	3.284	3.174	-0.611	-0.585	-0.892	-0.694
Q05519	SRSF11	Serine/arginine-rich splicing factor 11	mRNA splicing, via spliceosome;transcription from RNA polymerase II promoter;termination of RNA polymerase II transcription;mRNA processing;mRNA export from nucleus;RNA splicing;gene expression;mRNA 3'-end processing;	nucleus;nucleoplasm;	1.838	2.171	2.287	2.584	2.054	2.143	2.36	2.423	-0.362	-0.326	-0.56	-0.267
Q9BPX3	NCAPG	Condensin complex subunit 3	mitotic cell cycle;mitotic chromosome condensation;cell division;	condensin complex;nucleus;cytoplasm;centrosome;cytosol;actin cytoskeleton;membrane;	3.439	3.627	3.708	4.003	2.905	2.98	3.467	3.393	-0.701	-0.614	-0.965	-0.708
Q13546	RIPK1	Receptor-interacting serine/threonine-protein kinase 1	positive regulation of protein phosphorylation;toll-like receptor signaling pathway;MyD88-independent toll-like receptor signaling pathway;apoptotic process;activation of cysteine-type endopeptidase activity involved in apoptotic process;cell surface receptor signaling pathway;activation of JUN kinase activity;regulation of necrotic cell death;programmed cell death;positive regulation of type I i…	cytoplasm;mitochondrion;cytosol;death-inducing signaling complex;receptor complex;membrane raft;ripoptosome;	3.751	4.057	2.844	3.219	2.768	2.835	3.562	3.469	-0.952	-0.867	-1.135	-0.75
P04181	OAT	Ornithine aminotransferase, mitochondrial	visual perception;cellular amino acid biosynthetic process;protein hexamerization;cellular nitrogen compound metabolic process;small molecule metabolic process;L-proline biosynthetic process;	mitochondrion;mitochondrial matrix;	2.639	3.146	2.39	2.72	2.47	2.43	2.67	2.774	-0.46	-0.389	-0.883	-0.456
O75340	PDCD6	Programmed cell death protein 6	angiogenesis;positive regulation of endothelial cell proliferation;proteolysis;intracellular protein transport;activation of cysteine-type endopeptidase activity involved in apoptotic process;positive regulation of endothelial cell migration;negative regulation of vascular endothelial growth factor receptor signaling pathway;negative regulation of TOR signaling;cellular response to heat;vascular …	nucleus;cytoplasm;endosome;endoplasmic reticulum;endoplasmic reticulum membrane;cytoplasmic vesicle;nuclear membrane;extracellular exosome;endoplasmic reticulum exit site;	4.013	4.31	2.793	3.113	3.052	3.222	3.873	3.784	-0.851	-0.713	-0.984	-0.672
K7ENG2	U2AF2	U2 snRNP auxiliary factor large subunit	mRNA processing;	nucleus;	1.798	2.156	3.758	4.009	2.262	2.342	2.607	2.531	-0.489	-0.439	-1.334	-0.992
Q8IWA0	WDR75	WD repeat-containing protein 75	regulation of mitochondrion degradation;positive regulation of protein targeting to mitochondrion;	nucleoplasm;nucleolus;	2.804	3.104	2.614	2.92	2.485	2.561	3.082	2.997	-0.345	-0.214	-0.427	-0.161
Q9BTT0	ANP32E	Acidic leucine-rich nuclear phosphoprotein 32 family member E	negative regulation of catalytic activity;histone exchange;	Swr1 complex;nucleus;cytoplasmic membrane-bounded vesicle;	2.684	2.882	1.343	1.603	2.3	2.41	2.568	2.709	-0.292	-0.25	-0.645	-0.485
Q86W92	PPFIBP1	Liprin-beta-1	cell adhesion;	plasma membrane;focal adhesion;	3.293	3.396	3.009	3.157	2.916	3.058	3.609	3.516	-1.04	-1.019	-1.582	-1.444
Q9BVS4	RIOK2	Serine/threonine-protein kinase RIO2	protein phosphorylation;		3.223	3.323	3.434	3.683	2.753	2.823	3.315	3.202	-0.538	-0.441	-0.894	-0.68
O75153	CLUH	Clustered mitochondria protein homolog	mitochondrion organization;intracellular distribution of mitochondria;	cytoplasm;	3.473	3.579	3.666	3.938	2.718	2.815	3.222	3.128	-0.59	-0.517	-0.438	-0.136
Q9BTC0	DIDO1	Death-inducer obliterator 1	transcription, DNA-templated;apoptotic signaling pathway;	nucleus;cytoplasm;spindle;	3.113	3.048	3.169	3.224	2.378	2.481	2.722	2.295	0.192	0.35	-0.189	-0.458
P30041	PRDX6	Peroxiredoxin-6	response to reactive oxygen species;response to oxidative stress;phospholipid catabolic process;hydrogen peroxide catabolic process;oxidation-reduction process;	extracellular space;cytoplasm;lysosome;cytosol;membrane;cytoplasmic membrane-bounded vesicle;extracellular exosome;	2.834	3.057	2.957	3.205	2.636	2.802	3.487	3.502	-0.96	-0.911	-1.362	-1.143
P82675	MRPS5	28S ribosomal protein S5, mitochondrial	organelle organization;mitochondrial translation;mitochondrial translational initiation;mitochondrial translational elongation;mitochondrial translational termination;	mitochondrion;mitochondrial inner membrane;mitochondrial small ribosomal subunit;	2.648	2.716	4.202	4.179	2.293	2.34	2.541	2.36	-0.085	0.031	-0.241	-0.225
P33992	MCM5	DNA replication licensing factor MCM5	G1/S transition of mitotic cell cycle;mitotic cell cycle;DNA replication;DNA replication initiation;DNA strand elongation involved in DNA replication;DNA duplex unwinding;	nucleus;nucleoplasm;membrane;MCM complex;	2.782	3.064	2.956	3.218	2.559	2.636	3.187	2.999	-0.361	-0.274	-0.734	-0.43
P31040	SDHA	Succinate dehydrogenase [ubiquinone] flavoprotein subunit, mitochondrial	tricarboxylic acid cycle;succinate metabolic process;nervous system development;respiratory electron transport chain;cellular metabolic process;small molecule metabolic process;oxidation-reduction process;	mitochondrion;mitochondrial inner membrane;mitochondrial respiratory chain complex II, succinate dehydrogenase complex (ubiquinone);myelin sheath;	2.348	2.279	2.171	2.233	1.911	1.993	2.624	2.315	0.267	0.489	0.187	0.33
P27635	RPL10	60S ribosomal protein L10	ribosomal large subunit assembly;nuclear-transcribed mRNA catabolic process, nonsense-mediated decay;translation;translational initiation;translational elongation;translational termination;SRP-dependent cotranslational protein targeting to membrane;gene expression;viral process;viral life cycle;viral transcription;cellular protein metabolic process;	endoplasmic reticulum;cytosol;membrane;cytosolic large ribosomal subunit;	2.434	2.591	3.444	3.73	2.853	2.931	2.884	2.645	-0.038	0.005	-0.987	-0.887
O15371	EIF3D	Eukaryotic translation initiation factor 3 subunit D	formation of translation preinitiation complex;formation of cytoplasmic translation initiation complex;translation;translational initiation;regulation of translational initiation;gene expression;cellular protein metabolic process;	cytosol;eukaryotic translation initiation factor 3 complex;membrane;eukaryotic 43S preinitiation complex;eukaryotic 48S preinitiation complex;eukaryotic translation initiation factor 3 complex, eIF3m;	2.965	3.083	3.545	3.84	2.645	2.661	3.238	3.155	-0.638	-0.577	-0.941	-0.773
M0QZC5	RPS11	40S ribosomal protein S11	translation;	ribosome;	2.781	2.843	4.668	4.674	2.382	2.532	2.729	2.584	-0.164	-0.119	-0.331	-0.248
P11498	PC	Pyruvate carboxylase, mitochondrial	carbohydrate metabolic process;glucose metabolic process;pyruvate metabolic process;gluconeogenesis;lipid metabolic process;vitamin metabolic process;water-soluble vitamin metabolic process;biotin metabolic process;negative regulation of gene expression;viral RNA genome packaging;small molecule metabolic process;positive regulation by host of viral release from host cell;positive regulation by ho…	cytoplasm;mitochondrion;mitochondrial matrix;cytosol;	1.241	1.312	2.452	2.451	0.822	0.971	1.761	1.553	-0.07	-0.066	-0.271	-0.238
O00178	GTPBP1	GTP-binding protein 1	immune response;signal transduction;metabolic process;positive regulation of mRNA catabolic process;	cytoplasmic exosome (RNase complex);cytosol;membrane;	2.949	3.11	3.426	3.759	2.713	2.734	3.098	2.975	-0.526	-0.475	-0.877	-0.558
P30419	NMT1	Glycylpeptide N-tetradecanoyltransferase 1	in utero embryonic development;apoptotic process;phototransduction, visible light;programmed cell death;viral process;rhodopsin mediated signaling pathway;N-terminal peptidyl-glycine N-myristoylation;regulation of rhodopsin mediated signaling pathway;intrinsic apoptotic signaling pathway;positive regulation of protein insertion into mitochondrial membrane involved in apoptotic signaling pathway;	cytoplasm;cytosol;plasma membrane;actin cytoskeleton;extrinsic component of membrane;cell junction;	2.845	2.931	3.952	4.143	2.39	2.444	2.794	2.768	-0.232	-0.254	-0.491	-0.224
Q99543	DNAJC2	DnaJ homolog subfamily C member 2	DNA replication;transcription, DNA-templated;chromatin modification;cellular response to heat;positive regulation of transcription, DNA-templated;'de novo' cotranslational protein folding;regulation of cellular response to heat;negative regulation of DNA biosynthetic process;	nucleus;nucleoplasm;cytoplasm;cytosol;nuclear membrane;	3.102	3.406	3.29	3.484	2.633	2.717	3.181	3.075	-0.542	-0.34	-0.776	-0.774
P45974	USP5	Ubiquitin carboxyl-terminal hydrolase 5	protein deubiquitination;positive regulation of proteasomal ubiquitin-dependent protein catabolic process;proteasome-mediated ubiquitin-dependent protein catabolic process;protein K48-linked deubiquitination;	lysosome;	2.718	2.754	2.648	2.838	2.424	2.583	3.039	2.683	-0.441	-0.33	-0.878	-0.747
P49674	CSNK1E	Casein kinase I isoform epsilon	G2/M transition of mitotic cell cycle;mitotic cell cycle;DNA repair;protein phosphorylation;endocytosis;organelle organization;signal transduction;circadian rhythm;regulation of cell shape;Wnt signaling pathway;peptidyl-serine phosphorylation;negative regulation of Wnt signaling pathway;positive regulation of proteasomal ubiquitin-dependent protein catabolic process;circadian regulation of gene e…	nucleus;cytoplasm;cytosol;ribonucleoprotein complex;	3.068	3.323	3.149	3.48	2.646	2.829	3.311	3.016	-0.388	-0.293	-0.561	-0.583
P06899	HIST1H2BJ	Histone H2B type 1-J	innate immune response in mucosa;chromatin organization;nucleosome assembly;antibacterial humoral response;defense response to Gram-positive bacterium;	nucleosome;nuclear nucleosome;extracellular space;nucleus;nucleoplasm;	0.892	1.12	3.309	3.385	1.515	1.609	1.909	1.853	-0.306	-0.222	-0.971	-0.712
Q16630	CPSF6	Cleavage and polyadenylation specificity factor subunit 6	mRNA polyadenylation;mRNA processing;protein tetramerization;	nucleus;nucleoplasm;mRNA cleavage factor complex;membrane;ribonucleoprotein complex;paraspeckles;	2.589	2.737	2.619	2.684	2.377	2.481	3.082	2.929	-0.519	-0.426	-1.109	-0.86
Q8WXW3	PIBF1	Progesterone-induced-blocking factor 1		centrosome;	3.343	3.451	2.885	2.874	2.698	2.851	3.381	3.188	-0.49	-0.478	-0.86	-0.83
O95478	NSA2	Ribosome biogenesis protein NSA2 homolog	rRNA processing;	nucleus;nucleolus;ribonucleoprotein complex;	2.034	2.284	3.698	3.796	1.776	1.859	2.172	2.172	-0.13	-0.161	-0.446	-0.35
P46109	CRKL	Crk-like protein	activation of MAPKK activity;blood vessel development;JNK cascade;Ras protein signal transduction;heart development;positive regulation of cell proliferation;organ morphogenesis;anterior/posterior pattern specification;intracellular signal transduction;neurotrophin TRK receptor signaling pathway;thymus development;parathyroid gland development;	endosome;cytosol;extracellular exosome;	3.682	3.986	3.016	3.292	3.083	3.16	3.863	3.834	-1.161	-1.092	-1.464	-1.117
Q96M89	CCDC138	Coiled-coil domain-containing protein 138			4.499	4.622	3.744	3.685	3.345	3.434	3.392	3.19	0.072	0.133	0.068	0.091
H7BY58	PCMT1	Protein-L-isoaspartate O-methyltransferase	protein methylation;S-adenosylhomocysteine metabolic process;S-adenosylmethionine metabolic process;	cytoplasm;	3.33	3.662	3.068	3.196	2.91	2.992	3.372	3.37	-0.841	-0.741	-1.249	-0.919
Q68DQ2	CRYBG3	Very large A-kinase anchor protein			3.511	3.46	2.963	3.141	2.358	2.376	2.986	2.727	-0.374	-0.256	-0.125	-0.187
Q15269	PWP2	Periodic tryptophan protein 2 homolog	ribosomal small subunit assembly;maturation of SSU-rRNA from tricistronic rRNA transcript (SSU-rRNA, 5.8S rRNA, LSU-rRNA);	nucleolus;cytoplasm;small-subunit processome;Pwp2p-containing subcomplex of 90S preribosome;	2.839	2.948	2.824	2.995	2.406	2.525	2.952	2.862	0.001	0.061	-0.263	0.03
Q9NXF1	TEX10	Testis-expressed protein 10		nucleolus;cytoplasm;integral component of membrane;nuclear membrane;MLL1 complex;	2.481	2.728	3.155	3.534	2.357	2.448	2.83	2.738	-0.453	-0.371	-0.767	-0.403
Q99714	HSD17B10	3-hydroxyacyl-CoA dehydrogenase type-2	lipid metabolic process;cell aging;tRNA processing;branched-chain amino acid catabolic process;Leydig cell differentiation;cellular nitrogen compound metabolic process;small molecule metabolic process;protein homotetramerization;oxidation-reduction process;	cytoplasm;mitochondrion;mitochondrial inner membrane;mitochondrial matrix;endoplasmic reticulum;plasma membrane;	2.459	2.698	2.495	2.759	2.353	2.475	2.833	2.764	-0.49	-0.425	-0.758	-0.445
Q9NWB6	ARGLU1	Arginine and glutamate-rich protein 1	transcription, DNA-templated;regulation of transcription, DNA-templated;	nucleoplasm;mitochondrion;	0.154	0.173	-0.913	-1.058	0.029	0.072	-0.575	-0.583	0.028	0.071	0.228	0.132
Q08379	GOLGA2	Golgin subfamily A member 2	mitotic cell cycle;negative regulation of autophagy;negative regulation of protein binding;positive regulation of protein glycosylation;	Golgi cis cisterna;Golgi membrane;nucleus;Golgi apparatus;cis-Golgi network;ER to Golgi transport vesicle;Golgi cisterna membrane;	3.214	3.188	3.159	3.402	2.775	2.857	3.227	3.062	-0.383	-0.342	-0.784	-0.684
Q5TC82	RC3H1	Roquin-1	nuclear-transcribed mRNA catabolic process;B cell homeostasis;regulation of germinal center formation;negative regulation of germinal center formation;posttranscriptional regulation of gene expression;protein ubiquitination;negative regulation of B cell proliferation;cytoplasmic mRNA processing body assembly;T cell proliferation;T cell homeostasis;regulation of mRNA stability;negative regulation …	cytoplasmic mRNA processing body;cytoplasmic stress granule;	3.773	3.958	3.306	3.49	2.956	3.12	3.523	3.381	-0.664	-0.598	-0.741	-0.537
Q8ND83	SLAIN1	SLAIN motif-containing protein 1			3.338	3.321	3.063	2.962	2.404	2.495	3.309	3.015	-0.463	-0.417	-0.541	-0.543
P11279	LAMP1	Lysosome-associated membrane glycoprotein 1	autophagy;granzyme-mediated apoptotic signaling pathway;viral process;positive regulation of natural killer cell degranulation;positive regulation of natural killer cell mediated cytotoxicity;autophagic cell death;protein stabilization;establishment of protein localization to organelle;Golgi to lysosome transport;regulation of organelle transport along microtubule;	cytoplasm;lysosome;late endosome;multivesicular body;plasma membrane;integral component of plasma membrane;synaptic vesicle;external side of plasma membrane;endosome membrane;membrane;dendrite;sarcolemma;melanosome;neuronal cell body;cytolytic granule;perinuclear region of cytoplasm;phagolysosome membrane;extracellular exosome;alveolar lamellar body;lysosome;	3.269	3.528	2.536	2.726	2.874	2.944	3.113	3.194	-0.07	0.04	-0.312	-0.137
Q96HC4	PDLIM5	PDZ and LIM domain protein 5	regulation of synapse assembly;regulation of dendritic spine morphogenesis;	cytosol;postsynaptic density;actin cytoskeleton;membrane;Z disc;cell junction;neuron projection;postsynaptic membrane;	4.249	4.15	3.492	3.687	2.898	2.943	3.739	3.554	-1.099	-1.002	-1.256	-1.082
Q96R06	SPAG5	Sperm-associated antigen 5	mitotic sister chromatid segregation;spindle organization;chromosome segregation;establishment of spindle orientation;cell division;regulation of attachment of spindle microtubules to kinetochore;	kinetochore;condensed chromosome kinetochore;spindle pole;nucleus;nucleoplasm;cytoplasm;microtubule organizing center;spindle microtubule;midbody;microtubule plus-end;mitotic spindle;	3.572	3.812	3.104	3.43	2.756	2.793	3.333	3.282	-0.739	-0.656	-0.832	-0.552
Q9BY89	KIAA1671	Uncharacterized protein KIAA1671			3.016	3.028	2.798	2.794	2.344	2.518	3.2	3.082	-0.938	-0.781	-1.078	-0.983
F5H365	SEC23A	Protein transport protein Sec23A	intracellular protein transport;ER to Golgi vesicle-mediated transport;	COPII vesicle coat;	4.106	3.903	2.228	2.193	2.675	2.737	3.389	2.999	0.111	0.161	0.106	-0.114
P39748	FEN1	Flap endonuclease 1	mitotic cell cycle;telomere maintenance via recombination;telomere maintenance;DNA replication;DNA strand elongation involved in DNA replication;DNA repair;base-excision repair;double-strand break repair;memory;UV protection;telomere maintenance via semi-conservative replication;DNA replication, removal of RNA primer;nucleic acid phosphodiester bond hydrolysis;RNA phosphodiester bond hydrolysis, …	nucleus;nucleoplasm;nucleolus;mitochondrion;plasma membrane;membrane;protein complex;	2.78	3.023	3.395	3.541	2.633	2.691	3.107	2.996	-0.356	-0.306	-0.955	-0.823
O60763	USO1	General vesicular transport factor p115	mitotic cell cycle;intracellular protein transport;ER to Golgi vesicle-mediated transport;transcytosis;Golgi vesicle docking;vesicle fusion with Golgi apparatus;membrane fusion;	Golgi membrane;nucleolus;endoplasmic reticulum;Golgi apparatus;Golgi stack;cytosol;ER to Golgi transport vesicle membrane;membrane;perinuclear region of cytoplasm;	2.966	3.16	2.706	2.872	2.577	2.679	3.58	3.564	-0.848	-0.795	-1.209	-1.121
J3QQV1	RPL26	60S ribosomal protein L26	translation;	large ribosomal subunit;	1.086	0.982	3.576	3.379	1.932	2.1	1.986	1.761	-0.162	0.001	-0.908	-0.945
Q9H6T3	RPAP3	RNA polymerase II-associated protein 3			3.345	3.754	3.205	3.561	2.936	3.049	3.714	3.667	-1.14	-1.042	-1.693	-1.354
P07237	P4HB	Protein disulfide-isomerase	response to reactive oxygen species;protein folding;proteolysis;peptidyl-proline hydroxylation to 4-hydroxy-L-proline;extracellular matrix organization;response to endoplasmic reticulum stress;lipoprotein metabolic process;small molecule metabolic process;cell redox homeostasis;positive regulation of viral entry into host cell;cellular response to hypoxia;regulation of oxidative stress-induced in…	extracellular region;endoplasmic reticulum;endoplasmic reticulum lumen;endoplasmic reticulum-Golgi intermediate compartment;focal adhesion;external side of plasma membrane;procollagen-proline 4-dioxygenase complex;endoplasmic reticulum chaperone complex;melanosome;extracellular exosome;	2.59	2.904	3.29	3.533	2.77	2.794	2.916	2.803	-0.286	-0.13	-1.09	-0.836
Q5C9Z4	NOM1	Nucleolar MIF4G domain-containing protein 1		nucleus;nucleolus;	2.184	2.138	3.585	3.54	1.746	1.772	2.315	1.716	0.269	0.318	-0.427	-0.527
P62937	PPIA	Peptidyl-prolyl cis-trans isomerase A	protein peptidyl-prolyl isomerization;platelet degranulation;RNA-dependent DNA replication;protein folding;blood coagulation;viral process;viral life cycle;uncoating of virus;virion assembly;viral release from host cell;platelet activation;entry into host cell;lipid particle organization;regulation of viral genome replication;positive regulation of viral genome replication;positive regulation of …	extracellular region;extracellular space;nucleus;cytosol;focal adhesion;membrane;extracellular exosome;	2.881	3.232	2.691	2.873	2.935	2.953	3.673	3.66	-1.041	-1.03	-1.648	-1.363
Q16643	DBN1	Drebrin	actin filament organization;cell communication by chemical coupling;cell communication by electrical coupling;maintenance of protein location in cell;regulation of neuronal synaptic plasticity;regulation of dendrite development;neural precursor cell proliferation;	cytoplasm;plasma membrane;gap junction;cell cortex;actin cytoskeleton;dendrite;actomyosin;	3.4	3.338	2.966	2.96	2.681	2.855	3.652	3.653	-1.39	-1.23	-1.706	-1.686
E9PK47	PYGL	Alpha-1,4 glucan phosphorylase	glycogen catabolic process;	cytoplasm;plasma membrane;	2.887	3.189	2.868	3.132	2.477	2.61	3.128	3.096	-0.689	-0.61	-0.934	-0.644
P33981	TTK	Dual specificity protein kinase TTK	spindle organization;mitotic spindle organization;mitotic spindle assembly checkpoint;positive regulation of cell proliferation;positive regulation of pathway-restricted SMAD protein phosphorylation;peptidyl-tyrosine phosphorylation;chromosome separation;	spindle;membrane;	3.239	3.715	3.294	3.44	2.674	2.775	3.353	3.297	-0.789	-0.627	-0.886	-0.447
Q9Y6A5	TACC3	Transforming acidic coiled-coil-containing protein 3	microtubule cytoskeleton organization;response to hypoxia;cell proliferation;cerebral cortex development;neurogenesis;interkinetic nuclear migration;hemopoiesis;astral microtubule organization;regulation of microtubule-based process;cytoplasmic sequestering of transcription factor;regulation of cell cycle;	cytoplasm;centrosome;microtubule cytoskeleton;	3.773	4.018	3.425	3.559	2.903	3.069	3.991	3.83	-1.367	-1.179	-1.556	-1.385
Q6PI48	DARS2	Aspartate--tRNA ligase, mitochondrial	tRNA aminoacylation for protein translation;gene expression;tRNA aminoacylation;mitochondrial asparaginyl-tRNA aminoacylation;	nucleus;nucleoplasm;mitochondrion;mitochondrial matrix;	2.849	3.102	2.891	3.076	2.456	2.55	2.816	2.793	-0.321	-0.192	-0.633	-0.41
Q9BRS2	RIOK1	Serine/threonine-protein kinase RIO1	protein phosphorylation;		2.658	2.802	3.429	3.633	2.26	2.349	2.688	2.463	-0.124	-0.151	-0.383	-0.497
P54709	ATP1B3	Sodium/potassium-transporting ATPase subunit beta-3	transport;cellular sodium ion homeostasis;blood coagulation;potassium ion import;cellular potassium ion homeostasis;positive regulation of ATPase activity;ion transmembrane transport;sodium ion export from cell;protein stabilization;leukocyte migration;transmembrane transport;protein localization to plasma membrane;membrane repolarization;positive regulation of potassium ion transmembrane transpo…	plasma membrane;sodium:potassium-exchanging ATPase complex;caveola;melanosome;extracellular exosome;	2.798	3.008	1.443	1.731	2.586	2.681	3.087	2.967	-0.484	-0.432	-1.082	-0.88
A0A087WW06	TTC28	Tetratricopeptide repeat protein 28	regulation of mitotic cell cycle;	midbody;	3.091	3.3	2.65	2.956	2.434	2.566	3.128	2.999	-0.462	-0.45	-0.245	-0.271
Q86VM9	ZC3H18	Zinc finger CCCH domain-containing protein 18		nucleoplasm;	2.486	2.596	2.173	2.178	2.59	2.584	2.95	2.695	-0.029	0.106	-0.374	-0.313
O15067	PFAS	Phosphoribosylformylglycinamidine synthase	purine nucleobase metabolic process;purine nucleotide biosynthetic process;'de novo' IMP biosynthetic process;glutamine metabolic process;ribonucleoside monophosphate biosynthetic process;purine ribonucleoside monophosphate biosynthetic process;small molecule metabolic process;nucleobase-containing small molecule metabolic process;	cytoplasm;cytosol;extracellular exosome;	2.914	2.988	2.734	2.949	2.296	2.465	2.916	2.772	-0.209	-0.049	-0.156	-0.115
Q9NUD5	ZCCHC3	Zinc finger CCHC domain-containing protein 3			2.961	3.297	3.185	3.391	2.414	2.314	2.948	2.716	-0.622	-0.594	-0.963	-0.695
Q9Y3A2	UTP11	Probable U3 small nucleolar RNA-associated protein 11	rRNA processing;nervous system development;positive regulation of apoptotic process;	extracellular space;nucleolus;cytoplasm;small-subunit processome;	2.491	2.798	4.073	4.202	2.405	2.456	2.822	2.744	-0.231	-0.146	-0.883	-0.666
Q8WXA9-2	SREK1	Isoform 2 of Splicing regulatory glutamine/lysine-rich protein 1	mRNA processing;RNA splicing;	nucleoplasm;spliceosomal complex;	1.815	1.904	2.213	2.258	1.914	1.89	2.265	2.231	-0.135	-0.183	-0.567	-0.419
A0A0C4DG17	RPSA	40S ribosomal protein SA	ribosomal small subunit assembly;endonucleolytic cleavage in ITS1 to separate SSU-rRNA from 5.8S rRNA and LSU-rRNA from tricistronic rRNA transcript (SSU-rRNA, 5.8S rRNA, LSU-rRNA);endonucleolytic cleavage to generate mature 3'-end of SSU-rRNA from (SSU-rRNA, 5.8S rRNA, LSU-rRNA);rRNA export from nucleus;translation;cell adhesion;	nucleus;plasma membrane;cytosolic small ribosomal subunit;90S preribosome;	3.205	3.534	2.889	3.162	2.763	2.819	3.644	3.522	-1.227	-1.119	-1.301	-1.024
Q9Y678	COPG1	Coatomer subunit gamma-1	intracellular protein transport;retrograde vesicle-mediated transport, Golgi to ER;COPI coating of Golgi vesicle;establishment of Golgi localization;membrane organization;organelle transport along microtubule;	Golgi membrane;cytosol;COPI vesicle coat;	3.145	3.296	2.845	3.117	2.503	2.587	3.304	3.331	-0.749	-0.654	-1.007	-0.825
Q8NEJ9	NGDN	Neuroguidin	maturation of SSU-rRNA from tricistronic rRNA transcript (SSU-rRNA, 5.8S rRNA, LSU-rRNA);regulation of translation;	chromosome, centromeric region;nucleolus;cytoplasm;filopodium;axon;dendrite;small-subunit processome;	0.135	0.337	3.515	3.423	0.366	0.383	1.114	0.946	-0.078	-0.049	-0.773	-0.721
Q15032	R3HDM1	R3H domain-containing protein 1			4.051	4.124	3.327	3.287	2.57	2.676	3.213	3.164	-0.681	-0.621	-0.63	-0.4
P35611	ADD1	Alpha-adducin	cell morphogenesis;in utero embryonic development;cell volume homeostasis;apoptotic process;cellular component disassembly involved in execution phase of apoptosis;programmed cell death;hemoglobin metabolic process;actin cytoskeleton organization;erythrocyte differentiation;endoplasmic reticulum unfolded protein response;positive regulation of protein binding;multicellular organism growth;IRE1-me…	nucleus;nucleoplasm;cytosol;plasma membrane;focal adhesion;F-actin capping protein complex;intermediate filament cytoskeleton;	3.104	3.167	3.055	3.05	2.52	2.611	3.537	3.261	-0.719	-0.751	-1.293	-1.204
A0A1B0GVL4	FAM193A	Protein FAM193A			3.31	3.345	3.313	3.513	2.36	2.444	3.101	2.956	-0.607	-0.567	-0.325	-0.328
P34932	HSPA4	Heat shock 70 kDa protein 4	response to unfolded protein;protein import into mitochondrial outer membrane;chaperone-mediated protein complex assembly;	cytosol;extracellular exosome;	2.564	2.802	2.911	3.094	2.557	2.624	3.563	3.342	-0.572	-0.506	-1.02	-0.725
Q92576	PHF3	PHD finger protein 3	transcription, DNA-templated;multicellular organismal development;	nucleus;	3.003	2.889	3.225	2.959	2.557	2.684	2.531	2.518	-0.307	-0.241	-0.91	-0.559
Q9NV70	EXOC1	Exocyst complex component 1	exocytosis;Golgi to plasma membrane transport;organelle organization;protein transport;cellular protein metabolic process;phosphatidylinositol-mediated signaling;positive regulation of protein secretion;exocyst localization;membrane organization;	exocyst;cytoplasm;cytosol;plasma membrane;membrane;cytoplasmic side of apical plasma membrane;	3.165	3.369	3.127	3.358	2.845	2.857	3.356	3.278	-0.8	-0.804	-1.308	-1.121
Q9HAV4	XPO5	Exportin-5	protein export from nucleus;gene expression;pre-miRNA export from nucleus;positive regulation of RNA interference;	nucleus;nucleoplasm;cytoplasm;cytosol;RNA nuclear export complex;	3.392	3.611	3.446	3.657	2.725	2.744	3.382	3.358	-0.678	-0.59	-0.885	-0.6
P30414	NKTR	NK-tumor recognition protein	protein peptidyl-prolyl isomerization;protein folding;	membrane;	2.8	2.866	2.718	2.72	2.357	2.341	2.656	2.5	0.126	0.153	-0.121	-0.121
P62993	GRB2	Growth factor receptor-bound protein 2	epidermal growth factor receptor signaling pathway;small GTPase mediated signal transduction;Ras protein signal transduction;cell-cell signaling;axon guidance;aging;blood coagulation;insulin receptor signaling pathway;fibroblast growth factor receptor signaling pathway;positive regulation of signal transduction;viral process;platelet activation;positive regulation of actin filament polymerization…	nucleus;nucleoplasm;nucleolus;cytoplasm;endosome;Golgi apparatus;cytosol;plasma membrane;cell-cell junction;COP9 signalosome;vesicle membrane;extracellular exosome;Grb2-EGFR complex;	3.547	3.659	2.883	3.018	2.808	2.727	3.524	3.561	-1.08	-0.947	-1.373	-1.241
Q03164	KMT2A	Histone-lysine N-methyltransferase 2A	DNA methylation;chromatin organization;transcription from RNA polymerase II promoter;protein complex assembly;apoptotic process;negative regulation of cell proliferation;anterior/posterior pattern specification;positive regulation of transporter activity;circadian regulation of gene expression;embryonic hemopoiesis;response to potassium ion;histone H4-K16 acetylation;positive regulation of transc…	nucleus;nucleoplasm;cytoplasm;histone methyltransferase complex;MLL1 complex;	1.992	1.877	2.333	2.125	1.601	1.755	1.759	1.316	0.354	0.465	-0.046	-0.191
A7E2V4	ZSWIM8	Zinc finger SWIM domain-containing protein 8			3.103	3.418	2.665	2.882	2.356	2.449	2.941	2.819	-0.561	-0.522	-0.722	-0.364
Q9NVH0	EXD2	Exonuclease 3'-5' domain-containing protein 2	nucleic acid phosphodiester bond hydrolysis;	nucleus;cytoplasm;	3.509	3.797	2.834	3.075	2.705	2.762	2.565	2.437	0.923	0.938	0.767	0.929
P08243	ASNS	Asparagine synthetase [glutamine-hydrolyzing]	liver development;asparagine biosynthetic process;glutamine metabolic process;cellular amino acid biosynthetic process;response to light stimulus;response to mechanical stimulus;response to toxic substance;endoplasmic reticulum unfolded protein response;response to methotrexate;response to follicle-stimulating hormone;cellular response to hormone stimulus;cellular nitrogen compound metabolic proc…	cytosol;	3.154	3.483	2.762	2.916	2.636	2.698	3.405	3.261	-0.848	-0.792	-0.897	-0.629
P46976	GYG1	Glycogenin-1	carbohydrate metabolic process;glycogen biosynthetic process;glycogen catabolic process;glucose metabolic process;small molecule metabolic process;	cytosol;membrane;lysosomal lumen;extracellular exosome;	3.103	3.271	2.638	2.799	2.671	2.67	3.148	2.999	0.095	0.097	-0.176	0.007
Q14137	BOP1	Ribosome biogenesis protein BOP1	cleavage in ITS2 between 5.8S rRNA and LSU-rRNA of tricistronic rRNA transcript (SSU-rRNA, 5.8S rRNA, LSU-rRNA);maturation of LSU-rRNA from tricistronic rRNA transcript (SSU-rRNA, 5.8S rRNA, LSU-rRNA);cell proliferation;ribosome biogenesis;regulation of cell cycle;	nucleoplasm;ribonucleoprotein complex;preribosome, large subunit precursor;PeBoW complex;	2.939	3.053	3.451	3.452	2.364	2.544	3.105	2.857	-0.296	-0.117	-0.524	-0.445
Q12788	TBL3	Transducin beta-like protein 3	maturation of SSU-rRNA from tricistronic rRNA transcript (SSU-rRNA, 5.8S rRNA, LSU-rRNA);G-protein coupled receptor signaling pathway coupled to cGMP nucleotide second messenger;intracellular signal transduction;	nucleus;nucleolus;small-subunit processome;Pwp2p-containing subcomplex of 90S preribosome;	2.652	2.801	2.71	2.901	2.212	2.301	2.849	2.757	-0.246	-0.15	-0.388	-0.206
Q8TEU7	RAPGEF6	Rap guanine nucleotide exchange factor 6	Ras protein signal transduction;microvillus assembly;regulation of GTPase activity;positive regulation of GTPase activity;protein localization to plasma membrane;establishment of endothelial intestinal barrier;	cytosol;plasma membrane;apical plasma membrane;endocytic vesicle;	2.898	3.201	2.923	3.347	2.532	2.585	3.328	3.178	-0.806	-0.62	-1.028	-0.706
H3BMQ0	TSC2	Tuberin	negative regulation of Wnt signaling pathway;negative regulation of TOR signaling;positive regulation of GTPase activity;negative regulation of insulin receptor signaling pathway;regulation of small GTPase mediated signal transduction;regulation of cell cycle;negative regulation of protein kinase B signaling;	cytoplasm;TSC1-TSC2 complex;	3.073	2.861	2.663	2.668	2.128	2.34	2.859	2.697	-0.245	-0.113	-0.115	-0.332
Q96EP5	DAZAP1	DAZ-associated protein 1	maternal placenta development;spermatogenesis;cell proliferation;cell differentiation;positive regulation of mRNA splicing, via spliceosome;	nucleoplasm;cytoplasm;	3.237	3.506	3.228	3.341	2.695	2.874	3.503	3.492	-0.711	-0.611	-1.1	-0.958
A0AVT1	UBA6	Ubiquitin-like modifier-activating enzyme 6	ubiquitin-dependent protein catabolic process;learning;locomotory behavior;protein ubiquitination;amygdala development;hippocampus development;protein ubiquitination involved in ubiquitin-dependent protein catabolic process;dendritic spine development;	cytoplasm;cytosol;	3.175	3.337	2.985	3.231	2.855	2.889	3.362	3.293	-0.618	-0.574	-0.915	-0.719
Q1ED39	KNOP1	Lysine-rich nucleolar protein 1		nucleolus;	2.504	2.576	3.155	3.097	1.926	2.045	2.632	2.509	-0.373	-0.41	-0.942	-0.804
O95602	POLR1A	DNA-directed RNA polymerase I subunit RPA1	transcription from RNA polymerase I promoter;transcription initiation from RNA polymerase I promoter;transcription elongation from RNA polymerase I promoter;termination of RNA polymerase I transcription;gene expression;regulation of gene expression, epigenetic;negative regulation of gene expression, epigenetic;	nucleus;nucleoplasm;nucleolus;DNA-directed RNA polymerase I complex;cytoplasm;	2.838	2.64	3.281	3.332	1.984	2.235	2.318	1.882	-0.09	0.044	-0.087	0.023
P11274	BCR	Breakpoint cluster region protein	negative regulation of cellular extravasation;protein phosphorylation;signal transduction;small GTPase mediated signal transduction;brain development;peptidyl-tyrosine phosphorylation;actin cytoskeleton organization;response to lipopolysaccharide;regulation of Rho protein signal transduction;inner ear morphogenesis;regulation of vascular permeability;negative regulation of neutrophil degranulatio…	cytosol;postsynaptic density;membrane;cell junction;protein complex;postsynaptic membrane;extracellular exosome;	3.207	3.435	2.849	3.034	2.552	2.85	3.3	3.198	-0.732	-0.602	-0.91	-0.791
Q9H2J7	SLC6A15	Sodium-dependent neutral amino acid transporter B(0)AT2	ion transport;neurotransmitter transport;amino acid transport;neutral amino acid transport;leucine transport;proline transport;proline transmembrane transport;sodium ion transmembrane transport;transmembrane transport;	plasma membrane;integral component of plasma membrane;integral component of membrane;	2.972	3.1	2.217	2.383	2.819	2.971	3.079	2.911	-0.067	-0.032	-0.335	-0.187
Q9H1I8	ASCC2	Activating signal cointegrator 1 complex subunit 2	DNA repair;DNA dealkylation involved in DNA repair;transcription, DNA-templated;regulation of transcription, DNA-templated;	nucleoplasm;	3.291	3.209	3.386	3.571	2.157	2.323	2.858	2.861	-0.565	-0.445	-0.923	-0.666
E9PKG1	PRMT1	Protein arginine N-methyltransferase 1	regulation of transcription, DNA-templated;peptidyl-arginine methylation, to asymmetrical-dimethyl arginine;	cytosol;	3.232	3.52	2.942	3.215	2.828	2.817	3.536	3.488	-0.625	-0.533	-0.886	-0.624
A0A087WVR3	UHRF1	E3 ubiquitin-protein ligase UHRF1	histone monoubiquitination;	nuclear heterochromatin;nuclear matrix;	2.414	2.786	3.184	3.467	2.682	2.707	2.737	2.733	-0.213	-0.25	-0.894	-0.63
Q9HC35	EML4	Echinoderm microtubule-associated protein-like 4	microtubule-based process;negative regulation of microtubule depolymerization;mitotic nuclear division;	cytoplasm;microtubule;membrane;mitotic spindle;	2.769	2.679	2.509	2.264	2.26	2.434	2.956	2.627	-0.186	-0.074	-0.422	-0.347
O75175	CNOT3	CCR4-NOT transcription complex subunit 3	nuclear-transcribed mRNA catabolic process, deadenylation-dependent decay;nuclear-transcribed mRNA poly(A) tail shortening;trophectodermal cell differentiation;transcription, DNA-templated;regulation of transcription, DNA-templated;regulation of translation;gene expression;gene silencing by RNA;regulation of stem cell maintenance;	cytoplasmic mRNA processing body;nucleus;cytosol;CCR4-NOT complex;	3.714	3.924	3.418	3.613	2.993	3.114	3.97	3.94	-1.378	-1.307	-1.597	-1.36
P49959	MRE11	Double-strand break repair protein MRE11	regulation of mitotic recombination;double-strand break repair via homologous recombination;DNA repair;base-excision repair;double-strand break repair;double-strand break repair via nonhomologous end joining;DNA recombination;cellular response to DNA damage stimulus;telomere maintenance via telomerase;sister chromatid cohesion;mitotic G2 DNA damage checkpoint;synapsis;reciprocal meiotic recombina…	chromatin;nuclear chromatin;condensed nuclear chromosome;nucleus;nucleoplasm;cytosol;Mre11 complex;site of double-strand break;perinuclear region of cytoplasm;chromosome, telomeric region;	3.047	3.247	2.785	3.055	2.63	2.741	3.445	3.286	-0.848	-0.687	-1.326	-1.013
P61204	ARF3	ADP-ribosylation factor 3	phospholipid metabolic process;phosphatidylinositol biosynthetic process;small GTPase mediated signal transduction;protein transport;vesicle-mediated transport;small molecule metabolic process;	Golgi membrane;perinuclear region of cytoplasm;extracellular exosome;	3.414	3.723	2.554	2.852	2.96	3.065	3.721	3.626	-1.12	-0.964	-1.367	-1.084
Q12986	NFX1	Transcriptional repressor NF-X1	negative regulation of transcription from RNA polymerase II promoter;transcription from RNA polymerase II promoter;inflammatory response;viral process;negative regulation of MHC class II biosynthetic process;	nucleus;nucleoplasm;cytoplasm;plasma membrane;	3.239	3.402	3.256	3.372	2.681	2.495	3.33	3.167	-0.236	-0.136	-0.258	-0.207
Q8N3R9	MPP5	MAGUK p55 subfamily member 5	morphogenesis of an epithelial sheet;peripheral nervous system myelin maintenance;myelin assembly;cell junction assembly;protein localization to myelin sheath abaxonal region;cell-cell junction organization;bicellular tight junction assembly;establishment of protein localization to plasma membrane;	nucleoplasm;cytoplasm;plasma membrane;bicellular tight junction;endomembrane system;myelin sheath adaxonal region;lateral loop;Schmidt-Lanterman incisure;protein complex;extracellular exosome;	3.184	3.397	2.705	2.809	2.556	2.612	3.527	3.488	-1.155	-1.076	-1.469	-1.371
P27695	APEX1	DNA-(apurinic or apyrimidinic site) lyase	mitotic cell cycle;telomere maintenance via recombination;telomere maintenance;double-strand break repair via homologous recombination;DNA strand elongation involved in DNA replication;DNA repair;transcription-coupled nucleotide-excision repair;base-excision repair;nucleotide-excision repair;nucleotide-excision repair, DNA gap filling;mismatch repair;double-strand break repair;transcription, DNA-…	nucleus;nucleoplasm;nucleolus;cytoplasm;mitochondrion;endoplasmic reticulum;centrosome;ribosome;nuclear speck;perinuclear region of cytoplasm;	2.571	2.459	4.039	3.918	2.433	2.446	2.921	2.641	-0.154	-0.044	-0.544	-0.618
O15344	MID1	E3 ubiquitin-protein ligase Midline-1	microtubule cytoskeleton organization;negative regulation of microtubule depolymerization;pattern specification process;metabolic process;cytokine-mediated signaling pathway;positive regulation of stress-activated MAPK cascade;protein localization to microtubule;interferon-gamma-mediated signaling pathway;	spindle;cytosol;microtubule;microtubule associated complex;cytoplasmic microtubule;	3.167	3.159	3.307	3.123	1.929	2.216	2.622	2.212	-0.273	-0.031	-0.027	-0.193
Q07955	SRSF1	Serine/arginine-rich splicing factor 1	mRNA 5'-splice site recognition;mRNA splicing, via spliceosome;in utero embryonic development;regulation of transcription, DNA-templated;transcription from RNA polymerase II promoter;termination of RNA polymerase II transcription;mRNA splice site selection;mRNA processing;mRNA export from nucleus;regulation of translation;RNA splicing;gene expression;mRNA 3'-end processing;regulation of mRNA stab…	nucleus;nucleoplasm;cytoplasm;nuclear speck;extracellular exosome;catalytic step 2 spliceosome;exon-exon junction complex;	2.653	2.728	2.597	2.685	2.294	2.398	3.021	2.835	-0.628	-0.568	-1.099	-1.025
Q8IWX8	CHERP	Calcium homeostasis endoplasmic reticulum protein	RNA processing;cellular calcium ion homeostasis;nervous system development;negative regulation of cell proliferation;release of sequestered calcium ion into cytosol;positive regulation of NFAT protein import into nucleus;	cytoplasm;membrane;sarcoplasmic reticulum membrane;perinuclear region of cytoplasm;	2.711	2.914	2.314	2.507	2.671	2.729	3.271	3.194	-0.608	-0.519	-1.287	-1.032
Q16543	CDC37	Hsp90 co-chaperone Cdc37	regulation of cyclin-dependent protein serine/threonine kinase activity;protein folding;protein targeting;posttranscriptional regulation of gene expression;protein stabilization;regulation of interferon-gamma-mediated signaling pathway;regulation of type I interferon-mediated signaling pathway;activation of mitophagy in response to mitochondrial depolarization;	cytoplasm;cytosol;ruffle membrane;extracellular exosome;HSP90-CDC37 chaperone complex;	3.693	3.975	3.194	3.45	3.182	3.272	4.004	3.753	-1.206	-1.117	-1.612	-1.399
P19174	PLCG1	1-phosphatidylinositol 4,5-bisphosphate phosphodiesterase gamma-1	activation of MAPKK activity;in utero embryonic development;signal transduction;epidermal growth factor receptor signaling pathway;activation of phospholipase C activity;axon guidance;blood coagulation;fibroblast growth factor receptor signaling pathway;phospholipid catabolic process;positive regulation of epithelial cell migration;viral process;cell migration;cytokine-mediated signaling pathway;…	ruffle;cytoplasm;cytosol;plasma membrane;cell-cell junction;COP9 signalosome;lamellipodium;cell projection;	3.21	3.47	2.864	2.875	2.629	2.698	3.357	3.227	-0.729	-0.679	-0.886	-0.85
Q8TCG1	KIAA1524	Protein CIP2A	spermatogenesis;positive regulation of neural precursor cell proliferation;	cytoplasm;plasma membrane;integral component of membrane;	3.517	3.739	3.326	3.596	2.558	2.758	3.595	3.402	-0.904	-0.664	-1.028	-0.777
Q9Y4B5	MTCL1	Microtubule cross-linking factor 1	microtubule bundle formation;regulation of autophagy;establishment or maintenance of epithelial cell apical/basal polarity;positive regulation of protein targeting to membrane;positive regulation of microtubule motor activity;	spindle pole;extracellular space;cytoplasm;cytoskeleton;apical plasma membrane;apicolateral plasma membrane;lateral plasma membrane;midbody;microtubule bundle;	3.205	3.373	3.213	3.285	2.541	2.578	3.263	3.142	-0.493	-0.286	-0.601	-0.503
Q5VUA4	ZNF318	Zinc finger protein 318	transcription, DNA-templated;regulation of transcription, DNA-templated;meiotic cell cycle;	nucleoplasm;cytoplasm;	3.431	3.577	3.627	3.772	3.067	3.142	3.539	3.466	-0.545	-0.523	-0.848	-0.689
O14641	DVL2	Segment polarity protein dishevelled homolog DVL-2	neural tube closure;positive regulation of protein phosphorylation;outflow tract morphogenesis;transcription from RNA polymerase II promoter;small GTPase mediated signal transduction;segment specification;heart development;Wnt signaling pathway;convergent extension involved in neural plate elongation;cellular protein localization;hippo signaling;non-canonical Wnt signaling pathway;positive regula…	nucleus;cytoplasm;cytosol;plasma membrane;cytoplasmic vesicle;apical part of cell;clathrin-coated endocytic vesicle;	3.787	3.589	2.984	3.073	2.561	2.727	3.676	2.855	-0.639	-0.664	-0.692	-0.86
P46778	RPL21	60S ribosomal protein L21	nuclear-transcribed mRNA catabolic process, nonsense-mediated decay;translation;translational initiation;translational elongation;translational termination;SRP-dependent cotranslational protein targeting to membrane;gene expression;viral process;viral life cycle;viral transcription;cellular protein metabolic process;	nucleolus;cytoplasm;cytosol;membrane;cytosolic large ribosomal subunit;	2.678	2.95	3.986	3.986	2.525	2.546	2.964	2.89	-0.313	-0.274	-0.797	-0.571
G5E9D5	ELAC2	ElaC homolog 2 (E. coli), isoform CRA_a	tRNA 3'-trailer cleavage, endonucleolytic;	nucleoplasm;	3.017	3.166	3.256	3.379	2.712	2.777	3.23	3.162	-0.419	-0.359	-0.679	-0.561
Q92879	CELF1	CUGBP Elav-like family member 1	mRNA splice site selection;mRNA processing;germ cell development;spermatid development;embryo development;RNA interference;negative regulation of translation;positive regulation of multicellular organism growth;regulation of RNA splicing;	nucleus;nucleoplasm;cytoplasm;membrane;ribonucleoprotein complex;	2.896	3.08	3.705	3.812	2.657	2.752	3.122	3.132	-0.583	-0.502	-0.953	-0.788
P21359	NF1	Neurofibromin	MAPK cascade;osteoblast differentiation;metanephros development;response to hypoxia;liver development;negative regulation of endothelial cell proliferation;positive regulation of endothelial cell proliferation;regulation of cell-matrix adhesion;negative regulation of cell-matrix adhesion;negative regulation of protein kinase activity;cell communication;Ras protein signal transduction;negative reg…	nucleus;nucleolus;cytoplasm;membrane;axon;dendrite;intrinsic component of the cytoplasmic side of the plasma membrane;	3.087	3.262	2.921	3.144	2.63	2.794	3.194	2.955	-0.433	-0.382	-0.653	-0.475
O60318	MCM3AP	Germinal-center associated nuclear protein	immune system process;DNA replication;protein import into nucleus;mRNA transport;	nucleus;nuclear pore;nucleoplasm;cytoplasm;cytosol;nuclear membrane;	3.063	3.164	2.742	2.965	2.574	2.83	3.107	3.008	-0.66	-0.499	-0.992	-0.662
H0YNU5	BLM	Bloom syndrome protein	DNA replication;DNA repair;DNA recombination;DNA duplex unwinding;	nucleus;cytoplasm;	2.989	2.899	2.78	2.98	2.348	2.4	2.692	2.474	0.161	0.194	-0.403	-0.523
Q96AG4	LRRC59	Leucine-rich repeat-containing protein 59		nuclear envelope;endoplasmic reticulum;endoplasmic reticulum membrane;membrane;integral component of membrane;mitochondrial nucleoid;	2.805	3.123	3.579	3.772	3.113	3.064	3.106	3.019	-0.311	-0.258	-1.145	-0.862
Q12769	NUP160	Nuclear pore complex protein Nup160	mitotic cell cycle;carbohydrate metabolic process;mRNA export from nucleus;mitotic nuclear envelope disassembly;small GTPase mediated signal transduction;hexose transport;gene expression;regulation of glucose transport;protein transport;glucose transport;viral process;protein sumoylation;viral life cycle;viral transcription;cytokine-mediated signaling pathway;cellular response to heat;post-transl…	nuclear envelope;nuclear pore;cytosol;nuclear pore outer ring;kinetochore;	3.557	3.787	2.983	3.185	2.877	2.988	3.649	3.546	-0.647	-0.585	-0.525	-0.296
O60508	CDC40	Pre-mRNA-processing factor 17	mRNA splicing, via spliceosome;transcription from RNA polymerase II promoter;termination of RNA polymerase II transcription;mRNA export from nucleus;RNA splicing;gene expression;mRNA 3'-end processing;	nucleoplasm;spliceosomal complex;catalytic step 2 spliceosome;	2.677	2.804	3.031	3.123	2.42	2.507	2.826	2.678	-0.344	-0.288	-0.572	-0.523
Q9BUJ2	HNRNPUL1	Heterogeneous nuclear ribonucleoprotein U-like protein 1	mRNA splicing, via spliceosome;transcription, DNA-templated;regulation of transcription, DNA-templated;RNA processing;RNA splicing;response to virus;gene expression;	nucleus;nucleoplasm;ribonucleoprotein complex;	2.882	2.881	2.593	2.696	2.53	2.558	3.204	3.031	-0.386	-0.348	-0.609	-0.661
J3KPM9	STAT1	Signal transducer and activator of transcription	transcription, DNA-templated;regulation of transcription, DNA-templated;signal transduction;	nucleoplasm;nucleolus;cytoplasm;	3.142	3.26	3.251	3.415	2.702	2.774	3.374	3.33	-0.865	-0.785	-1.125	-0.899
O15234	CASC3	Protein CASC3	nuclear-transcribed mRNA catabolic process, nonsense-mediated decay;mRNA processing;regulation of translation;intracellular mRNA localization;RNA splicing;gene expression;mRNA transport;	cytosol;nuclear speck;ribonucleoprotein complex;exon-exon junction complex;perinuclear region of cytoplasm;	3.42	3.525	2.125	2.089	2.256	2.413	3.247	2.853	-0.285	-0.181	-0.446	-0.535
Q8TEM1	NUP210	Nuclear pore membrane glycoprotein 210	mitotic cell cycle;carbohydrate metabolic process;mitotic nuclear envelope disassembly;hexose transport;gene expression;regulation of glucose transport;protein transport;glucose transport;viral process;protein sumoylation;viral life cycle;viral transcription;cytokine-mediated signaling pathway;cellular response to heat;post-translational protein modification;cellular protein metabolic process;sma…	nuclear envelope;nuclear pore;endoplasmic reticulum membrane;membrane;nuclear membrane;	2.633	2.951	2.398	2.75	2.44	2.48	3.011	3.015	-0.448	-0.415	-0.717	-0.444
Q15637	SF1	Splicing factor 1	spliceosomal complex assembly;mRNA 3'-splice site recognition;mRNA splicing, via spliceosome;transcription, DNA-templated;regulation of transcription, DNA-templated;male sex determination;Leydig cell differentiation;negative regulation of smooth muscle cell proliferation;regulation of steroid biosynthetic process;negative regulation of nucleic acid-templated transcription;	nucleus;nucleoplasm;spliceosomal complex;ribosome;	2.736	2.995	2.889	3.128	2.404	2.545	3.009	2.956	-0.579	-0.521	-1.17	-0.755
Q15654	TRIP6	Thyroid receptor-interacting protein 6	transcription, DNA-templated;regulation of transcription, DNA-templated;release of cytoplasmic sequestered NF-kappaB;positive regulation of cell migration;focal adhesion assembly;	nucleus;cytoplasm;cytoskeleton;plasma membrane;focal adhesion;interleukin-1 receptor complex;	3.472	3.411	2.723	2.587	2.434	2.521	3.344	3.133	-0.782	-0.561	-0.726	-0.856
P05388	RPLP0	60S acidic ribosomal protein P0	nuclear-transcribed mRNA catabolic process, nonsense-mediated decay;translation;translational initiation;translational elongation;translational termination;SRP-dependent cotranslational protein targeting to membrane;gene expression;viral process;viral life cycle;viral transcription;ribosome biogenesis;cellular protein metabolic process;	nucleus;cytoplasm;cytosol;focal adhesion;membrane;cytosolic large ribosomal subunit;ribonucleoprotein complex;cytoplasmic ribonucleoprotein granule;extracellular exosome;	2.622	2.845	2.873	3.31	2.584	2.747	3.012	2.968	-0.334	-0.23	-0.699	-0.416
Q13162	PRDX4	Peroxiredoxin-4	I-kappaB phosphorylation;spermatogenesis;male gonad development;4-hydroxyproline metabolic process;protein maturation by protein folding;extracellular matrix organization;cell redox homeostasis;oxidation-reduction process;reactive oxygen species metabolic process;negative regulation of male germ cell proliferation;	extracellular space;nucleus;mitochondrion;smooth endoplasmic reticulum;cytosol;extracellular exosome;	3.356	3.165	2.817	3.027	2.681	2.73	3.193	3.114	-0.732	-0.681	-1.003	-0.853
Q7Z434	MAVS	Mitochondrial antiviral-signaling protein	positive regulation of protein phosphorylation;activation of innate immune response;positive regulation of defense response to virus by host;signal transduction;viral process;negative regulation of type I interferon production;positive regulation of interferon-alpha production;positive regulation of interferon-beta production;positive regulation of interleukin-8 production;positive regulation of …	mitochondrion;mitochondrial outer membrane;peroxisomal membrane;integral component of membrane;mitochondrial membrane;	4.963	4.863	3.324	3.465	3.229	3.355	3.011	2.822	0.886	0.963	1.011	1.179
Q9UBV8	PEF1	Peflin	proteolysis;response to calcium ion;	cytoplasm;membrane;extracellular exosome;	4.174	4.57	2.822	2.937	3.138	3.235	3.628	3.579	-0.702	-0.547	-0.785	-0.473
O43159	RRP8	Ribosomal RNA-processing protein 8	chromatin silencing at rDNA;transcription, DNA-templated;rRNA processing;gene expression;chromatin modification;methylation;regulation of gene expression, epigenetic;cellular response to glucose starvation;negative regulation of gene expression, epigenetic;regulation of transcription by glucose;positive regulation of cell cycle arrest;intrinsic apoptotic signaling pathway by p53 class mediator;	nucleus;nucleoplasm;chromatin silencing complex;nucleolus;cytoplasm;plasma membrane;rDNA heterochromatin;	2.689	2.861	3.448	3.635	2.534	2.51	2.807	2.627	-0.308	-0.194	-0.919	-0.788
O43264	ZW10	Centromere/kinetochore protein zw10 homolog	mitotic sister chromatid segregation;establishment of mitotic spindle orientation;mitotic cell cycle;protein complex assembly;ER to Golgi vesicle-mediated transport;Golgi organization;mitotic metaphase plate congression;mitotic cell cycle checkpoint;regulation of exit from mitosis;meiotic nuclear division;small GTPase mediated signal transduction;protein transport;protein localization to kinetoch…	kinetochore;condensed chromosome kinetochore;spindle pole;nucleus;cytoplasm;endoplasmic reticulum;endoplasmic reticulum membrane;kinetochore microtubule;cytosol;membrane;Dsl1p complex;RZZ complex;	3.364	3.634	3.117	3.394	2.687	2.82	3.517	3.405	-0.886	-0.867	-1.178	-0.924
P0CG47	UBB	Polyubiquitin-B	G1/S transition of mitotic cell cycle;G2/M transition of mitotic cell cycle;negative regulation of transcription from RNA polymerase II promoter;activation of MAPK activity;protein polyubiquitination;mitotic cell cycle;stimulatory C-type lectin receptor signaling pathway;toll-like receptor signaling pathway;antigen processing and presentation of peptide antigen via MHC class I;antigen processing …	extracellular space;nucleus;nucleoplasm;mitochondrion;cytosol;plasma membrane;endosome membrane;endocytic vesicle membrane;neuron projection;neuronal cell body;extracellular exosome;	2.909	3.077	2.62	2.832	2.48	2.604	3.042	3.078	-0.776	-0.679	-0.676	-0.526
Q9C0J8	WDR33	pre-mRNA 3' end processing protein WDR33	postreplication repair;mRNA polyadenylation;mRNA cleavage;spermatogenesis;	collagen trimer;nucleus;nucleoplasm;nucleolus;mRNA cleavage and polyadenylation specificity factor complex;	2.638	2.802	2.675	2.545	2.167	2.165	2.517	2.031	0.327	0.541	0.22	0.036
O95831	AIFM1	Apoptosis-inducing factor 1, mitochondrial	DNA catabolic process;apoptotic DNA fragmentation;apoptotic process;activation of cysteine-type endopeptidase activity involved in apoptotic process;neuron differentiation;chromosome condensation;mitochondrial respiratory chain complex I assembly;positive regulation of apoptotic process;cell redox homeostasis;neuron apoptotic process;oxidation-reduction process;intrinsic apoptotic signaling pathw…	nucleus;mitochondrion;mitochondrial inner membrane;mitochondrial intermembrane space;cytosol;perinuclear region of cytoplasm;	2.42	2.66	2.624	2.908	2.284	2.323	2.775	2.654	-0.048	-0.026	-0.389	-0.062
Q9BX40	LSM14B	Protein LSM14 homolog B	regulation of translation;multicellular organismal development;	ribonucleoprotein complex;	3.252	3.43	3.005	3.301	2.843	2.977	3.769	3.744	-1.115	-1.047	-1.468	-1.336
Q13601	KRR1	KRR1 small subunit processome component homolog	rRNA processing;	nucleus;nucleolus;cytoplasm;membrane;small-subunit processome;intercellular bridge;	2.445	2.618	3.638	3.87	2.419	2.429	2.832	2.747	-0.398	-0.298	-1.023	-0.888
Q9H792	PEAK1	Pseudopodium-enriched atypical kinase 1	protein phosphorylation;cell migration;peptidyl-tyrosine phosphorylation;substrate adhesion-dependent cell spreading;protein autophosphorylation;	nucleoplasm;cytoplasm;plasma membrane;focal adhesion;actin cytoskeleton;	3.697	3.445	2.669	2.646	2.473	2.482	3.342	2.994	-0.711	-0.611	-0.739	-0.909
P55084	HADHB	Trifunctional enzyme subunit beta, mitochondrial	fatty acid beta-oxidation;phospholipid metabolic process;cardiolipin acyl-chain remodeling;cellular lipid metabolic process;small molecule metabolic process;glycerophospholipid biosynthetic process;	mitochondrion;mitochondrial envelope;mitochondrial outer membrane;mitochondrial inner membrane;endoplasmic reticulum;mitochondrial nucleoid;extracellular exosome;	2.819	2.991	2.901	3.12	2.811	2.798	3.013	2.881	-0.193	-0.166	-0.72	-0.473
O94776	MTA2	Metastasis-associated protein MTA2	negative regulation of transcription from RNA polymerase II promoter;DNA methylation;chromatin organization;chromatin assembly or disassembly;regulation of fibroblast migration;histone deacetylation;ATP-dependent chromatin remodeling;positive regulation of transcription from RNA polymerase II promoter;	histone deacetylase complex;nuclear chromatin;nucleoplasm;transcription factor complex;membrane;NuRD complex;protein complex;	3.088	3.296	2.973	3.063	2.448	2.443	3.165	3.047	-0.137	0.086	-0.498	-0.478
Q9P275	USP36	Ubiquitin carboxyl-terminal hydrolase 36	protein deubiquitination;proteasome-mediated ubiquitin-dependent protein catabolic process;regulation of proteasomal protein catabolic process;regulation of mitochondrion degradation;positive regulation of protein targeting to mitochondrion;	nucleus;nucleolus;	2.901	2.63	3.356	3.328	2.556	2.566	2.762	2.554	0.065	0.21	-0.168	-0.337
P62277	RPS13	40S ribosomal protein S13	nuclear-transcribed mRNA catabolic process, nonsense-mediated decay;translation;translational initiation;translational elongation;translational termination;SRP-dependent cotranslational protein targeting to membrane;gene expression;viral process;viral life cycle;viral transcription;negative regulation of RNA splicing;cellular protein metabolic process;	nucleus;nucleolus;cytosol;ribosome;focal adhesion;membrane;cytosolic small ribosomal subunit;extracellular exosome;	2.576	2.84	3.535	3.781	3.028	3.087	3.252	3.18	-0.67	-0.564	-1.484	-1.144
O96013	PAK4	Serine/threonine-protein kinase PAK 4	apoptotic process;movement of cell or subcellular component;cytoskeleton organization;cell cycle;signal transduction;Rho protein signal transduction;regulation of mitotic cell cycle;cell proliferation;cell growth;cell migration;signal transduction by protein phosphorylation;actin cytoskeleton organization;stress-activated protein kinase signaling cascade;activation of protein kinase activity;regu…	cytoplasm;Golgi apparatus;focal adhesion;	2.592	2.565	2.608	2.63	2.048	2.345	3.243	2.851	-0.795	-0.598	-1.274	-1.237
Q5SRE5	NUP188	Nucleoporin NUP188 homolog	mitotic cell cycle;carbohydrate metabolic process;mitotic nuclear envelope disassembly;hexose transport;gene expression;regulation of glucose transport;protein transport;glucose transport;viral process;protein sumoylation;viral life cycle;viral transcription;cytokine-mediated signaling pathway;cellular response to heat;post-translational protein modification;cellular protein metabolic process;sma…	nuclear envelope;nuclear pore;membrane;	3.083	3.192	2.545	3.056	2.164	2.274	2.789	2.737	-0.652	-0.502	-0.812	-0.436
F6S8M0	GNS	N-acetylglucosamine-6-sulfatase	glycosaminoglycan metabolic process;	lysosome;	2.704	2.914	2.248	2.508	2.808	2.898	3.026	2.988	-0.22	-0.17	-0.526	-0.336
Q14146	URB2	Unhealthy ribosome biogenesis protein 2 homolog		nucleus;nucleolus;aggresome;	2.917	3.248	3.381	3.678	2.585	2.634	2.955	2.78	-0.168	-0.041	-0.44	-0.049
Q7Z3T8	ZFYVE16	Zinc finger FYVE domain-containing protein 16	protein targeting to lysosome;signal transduction;vesicle organization;endosomal transport;regulation of endocytosis;BMP signaling pathway;	cytoplasm;early endosome;early endosome membrane;intracellular membrane-bounded organelle;	4.36	4.568	2.985	3.159	3.063	3.185	3.994	3.917	-0.721	-0.741	-0.635	-0.441
Q86UW6	N4BP2	NEDD4-binding protein 2	phosphorylation;nucleic acid phosphodiester bond hydrolysis;	cytosol;	3.672	3.941	3.338	3.819	2.915	2.991	3.465	3.27	-0.531	-0.471	-0.651	-0.466
Q15287	RNPS1	RNA-binding protein with serine-rich domain 1	nuclear-transcribed mRNA catabolic process, nonsense-mediated decay;regulation of alternative mRNA splicing, via spliceosome;mRNA splicing, via spliceosome;transcription, DNA-templated;transcription from RNA polymerase II promoter;termination of RNA polymerase II transcription;mRNA export from nucleus;RNA splicing;gene expression;mRNA 3'-end processing;positive regulation of apoptotic process;neg…	nucleus;nucleoplasm;cytoplasm;cytosol;nuclear speck;ASAP complex;exon-exon junction complex;	1.759	1.971	2.11	2.268	1.865	1.838	2.338	2.242	-0.019	-0.015	-0.178	-0.051
Q9NVN8	GNL3L	Guanine nucleotide-binding protein-like 3-like protein	ribosome biogenesis;	nucleus;nucleoplasm;nucleolus;cytoplasm;mitochondrion;membrane;	3.032	3.269	3.685	3.991	2.575	2.679	3.286	3.209	-0.654	-0.575	-1.086	-0.785
Q8WUA2	PPIL4	Peptidyl-prolyl cis-trans isomerase-like 4	protein peptidyl-prolyl isomerization;protein folding;regulation of phosphorylation of RNA polymerase II C-terminal domain;	nucleus;	2.395	2.448	2.442	2.52	1.915	1.984	2.692	2.561	-0.629	-0.511	-1.091	-0.975
Q15056	EIF4H	Eukaryotic translation initiation factor 4H	translation;translational initiation;regulation of translational initiation;gene expression;viral process;sexual reproduction;cellular protein metabolic process;developmental growth;	cytosol;membrane;eukaryotic translation initiation factor 4F complex;perinuclear region of cytoplasm;	2.908	3.021	2.755	2.725	2.425	2.711	3.535	3.606	-1.165	-0.932	-1.44	-1.495
O75152	ZC3H11A	Zinc finger CCCH domain-containing protein 11A	poly(A)+ mRNA export from nucleus;	intracellular;transcription export complex;	2.524	2.389	3.052	2.912	2.445	2.466	2.477	2.166	-0.02	0.215	-0.336	-0.674
Q8WU90	ZC3H15	Zinc finger CCCH domain-containing protein 15	cytokine-mediated signaling pathway;	nucleolus;cytoplasm;	3.025	3.365	3.55	3.821	2.821	2.942	3.312	3.205	-0.639	-0.523	-1.298	-1.07
P33993	MCM7	DNA replication licensing factor MCM7	G1/S transition of mitotic cell cycle;mitotic cell cycle;DNA replication;DNA unwinding involved in DNA replication;DNA replication initiation;DNA strand elongation involved in DNA replication;cellular response to DNA damage stimulus;cell proliferation;regulation of phosphorylation;response to drug;cellular response to epidermal growth factor stimulus;cellular response to xenobiotic stimulus;	chromatin;nucleoplasm;cytoplasm;cytosol;membrane;MCM complex;	2.75	2.883	2.668	2.998	2.457	2.443	2.962	2.967	-0.449	-0.447	-0.707	-0.373
Q14011	CIRBP	Cold-inducible RNA-binding protein	response to cold;response to UV;negative regulation of translation;stress granule assembly;positive regulation of translation;mRNA stabilization;	nucleus;nucleoplasm;cytoplasm;cytoplasmic stress granule;	3.548	3.747	2.823	2.985	3.226	3.235	3.733	3.689	-0.712	-0.7	-1.407	-1.146
P51149	RAB7A	Ras-related protein Rab-7a	protein targeting to lysosome;endocytosis;epidermal growth factor catabolic process;endosome to lysosome transport;protein transport;viral release from host cell;antigen processing and presentation of exogenous peptide antigen via MHC class II;protein to membrane docking;Rab protein signal transduction;retrograde transport, endosome to Golgi;early endosome to late endosome transport;bone resorpti…	lysosome;lysosomal membrane;late endosome;vacuolar membrane;Golgi apparatus;phagocytic vesicle membrane;pre-autophagosomal structure membrane;melanosome;terminal bouton;intracellular membrane-bounded organelle;phagocytic vesicle;extracellular exosome;alveolar lamellar body;lysosome;late endosome;retromer complex;	3.431	3.672	2.559	2.806	3.073	3.148	3.379	3.302	-0.316	-0.275	-0.712	-0.467
P61313	RPL15	60S ribosomal protein L15	nuclear-transcribed mRNA catabolic process, nonsense-mediated decay;cytoplasmic translation;translation;translational initiation;translational elongation;translational termination;SRP-dependent cotranslational protein targeting to membrane;gene expression;viral process;viral life cycle;viral transcription;cellular protein metabolic process;	nucleus;cytosol;ribosome;cytosolic large ribosomal subunit;extracellular exosome;	2.695	2.774	3.78	3.849	2.755	2.845	2.868	2.66	-0.105	-0.051	-0.634	-0.538
Q9UKY7	CDV3	Protein CDV3 homolog	cell proliferation;	nucleolus;cytoplasm;plasma membrane;	4.345	4.54	3.155	3.276	3.565	3.651	3.885	3.796	-1.233	-1.155	-1.56	-1.532
Q5JTZ9	AARS2	Alanine--tRNA ligase, mitochondrial	tRNA aminoacylation for protein translation;gene expression;mitochondrial respiratory chain complex assembly;mitochondrial alanyl-tRNA aminoacylation;	mitochondrion;	2.669	2.778	2.609	2.695	2.276	2.326	2.566	2.331	-0.013	-0.02	-0.572	-0.486
O00443	PIK3C2A	Phosphatidylinositol 4-phosphate 3-kinase C2 domain-containing subunit alpha	adaptive immune response;protein phosphorylation;phospholipid metabolic process;phosphatidylinositol biosynthetic process;exocytosis;endocytosis;inflammatory response;epidermal growth factor receptor signaling pathway;insulin receptor signaling pathway;phosphatidylinositol 3-kinase signaling;vascular smooth muscle contraction;platelet activation;phosphatidylinositol-3-phosphate biosynthetic proce…	nucleus;cytoplasm;Golgi apparatus;cytosol;plasma membrane;phosphatidylinositol 3-kinase complex;membrane;clathrin-coated vesicle;vesicle;extracellular exosome;	3.634	3.822	2.931	3.256	2.759	2.888	3.51	3.535	-0.749	-0.718	-0.9	-0.588
Q8IZT6	ASPM	Abnormal spindle-like microcephaly-associated protein	neuron migration;positive regulation of neuroblast proliferation;spindle organization;mitotic nuclear division;spermatogenesis;male gonad development;forebrain neuroblast division;cerebral cortex development;negative regulation of neuron differentiation;negative regulation of asymmetric cell division;oogenesis;developmental growth;regulation of meiotic cell cycle;spindle localization;maintenance …	nucleus;cytoplasm;midbody;microtubule minus-end;meiotic spindle;mitotic spindle pole;	3.36	3.36	3.072	3.026	2.276	2.375	2.93	2.649	-0.312	-0.224	-0.161	-0.095
O95817	BAG3	BAG family molecular chaperone regulator 3	protein folding;brain development;extrinsic apoptotic signaling pathway via death domain receptors;negative regulation of striated muscle cell apoptotic process;spinal cord development;cellular response to heat;negative regulation of apoptotic process;protein stabilization;cellular response to mechanical stimulus;extrinsic apoptotic signaling pathway in absence of ligand;regulation of cellular re…	cytoplasm;cytosol;plasma membrane;Z disc;neuron projection;	3.226	3.017	2.227	2.135	2.365	2.472	3.302	2.89	-0.726	-0.567	-0.773	-0.9
Q5T200	ZC3H13	Zinc finger CCCH domain-containing protein 13			2.257	2.003	1.243	0.971	1.569	1.331	2.015	1.633	0.045	0.054	-0.167	-0.467
Q9UP95-5	SLC12A4	Isoform 5 of Solute carrier family 12 member 4	transport;ion transport;chloride transport;cell volume homeostasis;synaptic transmission;potassium ion import;chloride ion homeostasis;potassium ion homeostasis;transmembrane transport;chloride transmembrane transport;	lysosomal membrane;plasma membrane;integral component of plasma membrane;membrane;	2.955	3.046	2.686	2.914	2.54	2.624	2.855	2.79	-0.284	-0.158	-0.39	-0.313
P00918	CA2	Carbonic anhydrase 2	kidney development;morphogenesis of an epithelium;one-carbon metabolic process;response to pH;response to zinc ion;bicarbonate transport;positive regulation of synaptic transmission, GABAergic;positive regulation of cellular pH reduction;angiotensin-activated signaling pathway;odontogenesis of dentin-containing tooth;response to estrogen;regulation of anion transport;small molecule metabolic proc…	extracellular space;cytoplasm;cytosol;plasma membrane;microvillus;basolateral plasma membrane;axon;myelin sheath;apical part of cell;extracellular exosome;	2.29	2.459	2.633	2.969	2.46	2.524	2.805	2.74	-0.104	-0.067	-0.787	-0.627
Q8IZD4	DCP1B	mRNA-decapping enzyme 1B	nuclear-transcribed mRNA catabolic process, nonsense-mediated decay;nuclear-transcribed mRNA catabolic process, deadenylation-dependent decay;deadenylation-dependent decapping of nuclear-transcribed mRNA;gene expression;deadenylation-independent decapping of nuclear-transcribed mRNA;exonucleolytic nuclear-transcribed mRNA catabolic process involved in deadenylation-dependent decay;regulation of c…	cytoplasmic mRNA processing body;nucleus;cytoplasm;cytosol;membrane;intracellular membrane-bounded organelle;	2.804	3.058	3.355	3.885	2.218	2.271	2.983	2.806	-0.718	-0.663	-1.125	-0.836
Q8WX93	PALLD	Palladin	keratinocyte development;epithelial cell morphogenesis;cytoskeleton organization;actin cytoskeleton organization;	ruffle;nucleus;cytoplasm;mitochondrion;actin filament;plasma membrane;focal adhesion;actin cytoskeleton;Z disc;lamellipodium;	2.877	2.941	2.633	2.677	2.273	2.381	3.364	3.278	-0.999	-0.902	-1.362	-1.174
O14936	CASK	Peripheral plasma membrane protein CASK	negative regulation of cell-matrix adhesion;protein phosphorylation;cell adhesion;synaptic transmission;neurotransmitter secretion;negative regulation of keratinocyte proliferation;extracellular matrix organization;positive regulation of transcription from RNA polymerase II promoter;nucleotide phosphorylation;negative regulation of wound healing;calcium ion import;positive regulation of calcium i…	basement membrane;nuclear lamina;nucleolus;cytoplasm;cytosol;plasma membrane;cell-cell junction;focal adhesion;actin cytoskeleton;basolateral plasma membrane;nuclear matrix;vesicle;presynaptic membrane;ciliary membrane;basement membrane;	2.898	3.078	3.319	3.706	2.701	2.785	3.131	3.167	-1.068	-0.928	-1.329	-1.14
Q9UNF0	PACSIN2	Protein kinase C and casein kinase substrate in neurons protein 2	actin cytoskeleton organization;regulation of endocytosis;protein localization to endosome;negative regulation of endocytosis;cell projection morphogenesis;caveola assembly;caveolin-mediated endocytosis;membrane tubulation;	nucleoplasm;cytoplasm;endosome;early endosome;cytosol;cytoskeleton;caveola;cell-cell junction;focal adhesion;extrinsic component of membrane;cytoplasmic vesicle membrane;membrane-bounded vesicle;ruffle membrane;intracellular membrane-bounded organelle;recycling endosome membrane;extracellular exosome;	3.436	3.524	2.982	3.12	3.082	3.162	3.724	3.569	-1.18	-1.091	-1.844	-1.595
Q8ND56	LSM14A	Protein LSM14 homolog A	regulation of translation;multicellular organismal development;cytoplasmic mRNA processing body assembly;RIG-I signaling pathway;positive regulation of type I interferon-mediated signaling pathway;	cytoplasmic mRNA processing body;cytoplasm;cytoplasmic stress granule;intracellular membrane-bounded organelle;	4.122	4.012	3.108	2.942	3.046	3.126	3.812	3.585	-0.844	-0.49	-0.751	-0.998
O14976	GAK	Cyclin-G-associated kinase	protein phosphorylation;cell cycle;	Golgi apparatus;focal adhesion;membrane;intracellular membrane-bounded organelle;perinuclear region of cytoplasm;	3.677	3.949	3.231	3.337	3.04	3.113	3.614	3.639	-0.91	-0.881	-0.942	-0.625
Q06323	PSME1	Proteasome activator complex subunit 1	G1/S transition of mitotic cell cycle;protein polyubiquitination;mitotic cell cycle;stimulatory C-type lectin receptor signaling pathway;antigen processing and presentation of peptide antigen via MHC class I;antigen processing and presentation of exogenous peptide antigen via MHC class I, TAP-dependent;regulation of cellular amino acid metabolic process;apoptotic process;DNA damage response, sign…	proteasome complex;nucleoplasm;cytoplasm;cytosol;proteasome activator complex;extracellular exosome;	3.148	3.412	2.563	2.922	2.751	2.859	3.551	3.386	-1.36	-1.144	-1.727	-1.364
Q32MZ4	LRRFIP1	Leucine-rich repeat flightless-interacting protein 1	transcription, DNA-templated;regulation of transcription from RNA polymerase II promoter;positive regulation of type I interferon production;innate immune response;negative regulation of transcription, DNA-templated;	nucleus;cytoplasm;cytosol;cytoskeleton;plasma membrane;	3.17	3.49	3.444	3.353	2.526	2.711	3.528	3.344	-0.875	-0.71	-1.232	-1.063
O43663	PRC1	Protein regulator of cytokinesis 1	mitotic spindle elongation;cytokinesis;small GTPase mediated signal transduction;	spindle pole;nucleus;nucleoplasm;cytoplasm;spindle;cytosol;spindle microtubule;plasma membrane;microtubule cytoskeleton;	3.246	3.42	3.122	3.31	2.545	2.722	3.401	3.286	-0.769	-0.607	-1.111	-0.892
P42166	TMPO	Lamina-associated polypeptide 2, isoform alpha	regulation of transcription, DNA-templated;	chromatin;nucleus;nuclear envelope;nuclear inner membrane;	2.872	2.927	2.745	2.94	2.577	2.642	3.105	2.948	-0.194	-0.279	-0.63	-0.624
P50502	ST13	Hsc70-interacting protein	protein folding;protein homooligomerization;negative regulation of protein refolding;chaperone cofactor-dependent protein refolding;	cytoplasm;cytosol;protein complex;extracellular exosome;	3.586	3.869	2.803	3.038	3.444	3.499	3.985	4.016	-1.366	-1.276	-1.816	-1.638
Q96T51	RUFY1	RUN and FYVE domain-containing protein 1	endocytosis;protein transport;regulation of endocytosis;	nucleus;cytoplasm;early endosome membrane;intracellular membrane-bounded organelle;	4.29	4.457	3.467	3.677	3.178	3.347	4.131	3.811	-0.93	-0.773	-1.144	-0.963
Q99567	NUP88	Nuclear pore complex protein Nup88	ribosomal large subunit export from nucleus;ribosomal small subunit export from nucleus;mitotic cell cycle;carbohydrate metabolic process;mRNA export from nucleus;protein import into nucleus;protein export from nucleus;mitotic nuclear envelope disassembly;hexose transport;gene expression;regulation of glucose transport;glucose transport;viral process;protein sumoylation;viral life cycle;viral tra…	nuclear pore;nucleoplasm;cytosol;	3.545	3.862	3.262	3.502	3.22	3.284	3.83	3.745	-0.949	-0.795	-1.295	-0.965
Q8N5F7	NKAP	NF-kappa-B-activating protein	negative regulation of transcription from RNA polymerase II promoter;transcription, DNA-templated;Notch signaling pathway;stem cell maintenance;granulocyte differentiation;T cell differentiation in thymus;negative regulation of transcription, DNA-templated;positive regulation of alpha-beta T cell differentiation;hematopoietic stem cell proliferation;positive regulation of protein targeting to mit…	nucleoplasm;cytoplasm;	1.927	1.978	2.298	2.146	2.028	2.08	2.583	2.322	-0.16	-0.12	-0.368	-0.332
Q6PL18	ATAD2	ATPase family AAA domain-containing protein 2	transcription, DNA-templated;negative regulation of chromatin silencing;positive regulation of transcription, DNA-templated;positive regulation of transcription from RNA polymerase II promoter;	nucleus;nucleoplasm;extracellular exosome;	3.106	3.414	3.257	3.443	2.831	2.884	3.138	3.045	-0.426	-0.349	-0.954	-0.616
P63241	EIF5A	Eukaryotic translation initiation factor 5A-1	mRNA export from nucleus;translational frameshifting;protein export from nucleus;nucleocytoplasmic transport;apoptotic process;positive regulation of cell proliferation;peptidyl-lysine modification to peptidyl-hypusine;post-translational protein modification;cellular protein metabolic process;positive regulation of translational elongation;positive regulation of translational termination;nucleocy…	nucleus;annulate lamellae;nuclear pore;cytoplasm;endoplasmic reticulum membrane;cytosol;membrane;extracellular exosome;	3.259	3.399	3.213	3.421	2.899	2.976	3.531	3.438	-0.781	-0.748	-1.253	-1.082
Q96CX2	KCTD12	BTB/POZ domain-containing protein KCTD12	protein homooligomerization;	cell junction;presynaptic membrane;postsynaptic membrane;extracellular exosome;	3.005	3.371	2.863	3.234	2.636	2.741	3.35	3.227	-0.704	-0.605	-1.011	-0.657
Q7L2J0	MEPCE	7SK snRNA methylphosphate capping enzyme	negative regulation of transcription from RNA polymerase II promoter;RNA methylation;snRNA metabolic process;negative regulation of chromatin binding;snRNA modification;positive regulation of G1/S transition of mitotic cell cycle;		2.638	2.52	3.574	2.962	1.69	1.701	1.878	1.439	0.369	0.47	-0.094	-0.273
Q8IWS0	PHF6	PHD finger protein 6	transcription, DNA-templated;regulation of transcription, DNA-templated;	condensed chromosome kinetochore;nucleus;nucleoplasm;nucleolus;	2.976	2.91	3.344	3.382	2.358	2.408	2.966	2.282	0.082	0.132	-0.596	-0.619
I3L0N3	NSF	Vesicle-fusing ATPase	intra-Golgi vesicle-mediated transport;Golgi to plasma membrane protein transport;Golgi vesicle docking;	cytoplasm;Golgi stack;	2.627	2.913	2.472	2.806	2.413	2.498	3.208	3.119	-0.473	-0.424	-0.907	-0.498
Q9BY12	SCAPER	S phase cyclin A-associated protein in the endoplasmic reticulum		nucleus;nucleoplasm;cytoplasm;endoplasmic reticulum;	3.03	2.938	3.257	3.645	2.699	2.767	3.136	2.968	-0.658	-0.411	-0.691	-0.641
O75131	CPNE3	Copine-3	protein phosphorylation;lipid metabolic process;phospholipid metabolic process;vesicle-mediated transport;small molecule metabolic process;glycerophospholipid biosynthetic process;cellular response to calcium ion;	nucleus;cytoplasm;cytosol;plasma membrane;extracellular exosome;	3.322	3.549	3.034	3.241	2.931	2.948	3.497	3.361	-0.813	-0.747	-1.05	-0.917
Q92538	GBF1	Golgi-specific brefeldin A-resistance guanine nucleotide exchange factor 1	cell activation involved in immune response;retrograde vesicle-mediated transport, Golgi to ER;post-Golgi vesicle-mediated transport;Golgi to endosome transport;organelle organization;Golgi organization;regulation of mitotic cell cycle;protein transport;viral process;regulation of cell adhesion;neutrophil chemotaxis;regulation of ARF protein signal transduction;protein localization to Golgi appar…	Golgi membrane;mitochondrion;peroxisome;endoplasmic reticulum lumen;endoplasmic reticulum-Golgi intermediate compartment;Golgi apparatus;Golgi stack;cis-Golgi network;trans-Golgi network;lipid particle;plasma membrane;membrane;cell leading edge;	3.012	3.302	2.749	3.063	2.705	2.773	3.832	3.589	-0.48	-0.466	-0.977	-0.707
Q13395	TARBP1	Probable methyltransferase TARBP1	RNA methylation;regulation of transcription from RNA polymerase II promoter;RNA processing;	nucleus;	3.551	3.745	2.868	3.157	2.96	3.028	3.462	3.507	-0.707	-0.674	-0.745	-0.423
G3V256	ZC3H14	Zinc finger CCCH domain-containing protein 14	regulation of mRNA stability;negative regulation of mRNA polyadenylation;	nucleus;nucleoplasm;nucleolus;	2.945	2.873	2.713	2.798	2.557	2.682	2.838	2.402	-0.068	-0.039	-0.602	-0.509
P68431	HIST1H3A	Histone H3.1	chromatin silencing at rDNA;positive regulation of defense response to virus by host;chromatin organization;nucleosome assembly;DNA replication-dependent nucleosome assembly;small GTPase mediated signal transduction;blood coagulation;gene expression;DNA methylation on cytosine;regulation of gene expression, epigenetic;negative regulation of gene expression, epigenetic;protein heterotetramerizatio…	nuclear chromosome;nucleosome;nuclear nucleosome;extracellular region;nucleus;nucleoplasm;membrane;protein complex;extracellular exosome;	1.608	1.594	3.898	4.012	1.707	1.846	2.091	1.953	-0.088	0.11	-0.458	-0.51
Q1MSJ5	CSPP1	Centrosome and spindle pole-associated protein 1	positive regulation of cytokinesis;positive regulation of cell division;	spindle pole;nucleoplasm;cytoplasm;centrosome;spindle;microtubule;	2.944	2.977	2.044	2.077	2.046	2.177	2.873	2.639	-0.258	-0.285	-0.131	-0.275
Q8IY67-2	RAVER1	Isoform 2 of Ribonucleoprotein PTB-binding 1		nucleus;cytoplasm;	2.724	2.919	2.58	2.804	2.387	2.568	2.98	2.936	-0.392	-0.277	-0.739	-0.6
Q13148	TARDBP	TAR DNA-binding protein 43	negative regulation of protein phosphorylation;transcription from RNA polymerase II promoter;mRNA processing;RNA splicing;negative regulation of gene expression;nuclear fragmentation involved in apoptotic nuclear change;positive regulation of insulin secretion;response to endoplasmic reticulum stress;negative regulation by host of viral transcription;positive regulation of transcription from RNA …	nucleus;nucleoplasm;perichromatin fibrils;cytoplasm;nuclear speck;interchromatin granule;	2.723	2.799	3.301	3.633	2.566	2.753	2.919	2.838	-0.45	-0.266	-0.945	-0.776
P26373	RPL13	60S ribosomal protein L13	nuclear-transcribed mRNA catabolic process, nonsense-mediated decay;translation;translational initiation;translational elongation;translational termination;SRP-dependent cotranslational protein targeting to membrane;gene expression;viral process;viral life cycle;viral transcription;cellular protein metabolic process;	nucleus;nucleolus;cytoplasm;cytosol;membrane;cytosolic large ribosomal subunit;cytosolic ribosome;	2.146	2.324	4.005	4.074	2.341	2.37	2.632	2.511	-0.238	-0.215	-0.915	-0.659
Q92625	ANKS1A	Ankyrin repeat and SAM domain-containing protein 1A	substrate-dependent cell migration;neuron remodeling;ephrin receptor signaling pathway;	nucleoplasm;cytoplasm;neuron projection;	2.474	2.265	2.152	2.213	1.981	2.047	2.539	2.468	-0.349	-0.211	-0.553	-0.711
A0A0A0MT49	SMARCA4	Transcription activator BRG1	regulation of transcription, DNA-templated;metabolic process;ATP-dependent chromatin remodeling;	SWI/SNF complex;	2.357	2.63	2.698	2.814	2.512	2.617	3.22	2.577	-0.473	-0.346	-0.854	-0.791
O76003	GLRX3	Glutaredoxin-3	regulation of the force of heart contraction;negative regulation of cardiac muscle hypertrophy;cell redox homeostasis;oxidation-reduction process;	nucleus;cell cortex;Z disc;dendrite;extracellular exosome;	3.78	3.956	2.94	3.246	3.148	3.231	3.817	3.773	-0.867	-0.803	-1.235	-0.961
Q12756	KIF1A	Kinesin-like protein KIF1A	anterograde axon cargo transport;metabolic process;vesicle-mediated transport;	cytoplasm;kinesin complex;microtubule;neuron projection;neuronal cell body;	3.164	3.315	3.165	3.339	2.568	2.682	3.386	3.267	-0.245	-0.206	-0.509	-0.6
Q12888	TP53BP1	TP53-binding protein 1	double-strand break repair via homologous recombination;DNA repair;double-strand break repair;transcription, DNA-templated;cellular response to DNA damage stimulus;positive regulation of transcription, DNA-templated;positive regulation of transcription from RNA polymerase II promoter;positive regulation of sequence-specific DNA binding transcription factor activity;cellular response to X-ray;	condensed chromosome kinetochore;nuclear chromosome, telomeric region;nucleus;nucleoplasm;replication fork;cytoplasm;chromosome, telomeric region;	3.389	3.367	3.266	3.397	2.795	2.769	3.503	3.287	-0.232	-0.102	-0.593	-0.686
Q6UVJ0	SASS6	Spindle assembly abnormal protein 6 homolog	centriole replication;centrosome duplication;	centrosome;centriole;deuterosome;	3.816	3.988	3.178	3.575	3.001	3.012	3.713	3.632	-0.829	-0.812	-1.092	-0.791
P52209	PGD	6-phosphogluconate dehydrogenase, decarboxylating	carbohydrate metabolic process;pentose-phosphate shunt;pentose-phosphate shunt, oxidative branch;pentose biosynthetic process;D-gluconate metabolic process;small molecule metabolic process;oxidation-reduction process;	nucleus;cytosol;extracellular exosome;	3.154	3.258	2.849	2.993	2.782	2.984	3.532	3.497	-0.911	-0.859	-1.154	-1.078
E9PF63	ROCK2	Rho-associated protein kinase 2	protein phosphorylation;smooth muscle contraction;Rho protein signal transduction;positive regulation of centrosome duplication;regulation of actin cytoskeleton organization;	intracellular;	3.708	3.849	3.349	3.442	2.793	2.932	3.765	3.557	-1.009	-0.876	-1.286	-1.182
Q969T9	WBP2	WW domain-binding protein 2	establishment of protein localization;positive regulation of gene expression, epigenetic;positive regulation of transcription from RNA polymerase II promoter;cellular response to estrogen stimulus;positive regulation of histone H3-K14 acetylation;	nuclear chromatin;	4.559	4.605	3.162	3.352	3.582	3.605	4.059	4.047	-0.793	-0.692	-0.738	-0.563
Q6P4Q7	CNNM4	Metal transporter CNNM4	visual perception;magnesium ion homeostasis;magnesium ion transport;sodium ion transmembrane transport;response to stimulus;enamel mineralization;	integral component of membrane;basolateral plasma membrane;	2.625	2.986	1.404	1.791	2.49	2.4	3.135	2.889	-0.464	-0.344	-0.975	-0.656
O60884	DNAJA2	DnaJ homolog subfamily A member 2	positive regulation of cell proliferation;response to heat;carbon tetrachloride metabolic process;protein refolding;	nucleus;cytosol;membrane;extracellular exosome;	3.018	3.12	2.603	2.755	2.583	2.535	3.272	3.017	-0.681	-0.646	-1.143	-0.892
Q96ME7	ZNF512	Zinc finger protein 512	transcription, DNA-templated;regulation of transcription, DNA-templated;	nucleus;nucleoplasm;	2.341	2.399	3.102	3.291	2.21	2.347	2.183	1.963	0.055	0.182	-0.504	-0.509
P00533	EGFR	Epidermal growth factor receptor	MAPK cascade;activation of MAPKK activity;ossification;embryonic placenta development;positive regulation of protein phosphorylation;hair follicle development;response to stress;signal transduction;cell surface receptor signaling pathway;epidermal growth factor receptor signaling pathway;activation of phospholipase C activity;axon guidance;salivary gland morphogenesis;learning or memory;cell prol…	Golgi membrane;extracellular space;nucleus;cytoplasm;endosome;endoplasmic reticulum membrane;plasma membrane;focal adhesion;cell surface;endosome membrane;membrane;integral component of membrane;basolateral plasma membrane;early endosome membrane;nuclear membrane;receptor complex;membrane raft;perinuclear region of cytoplasm;Shc-EGFR complex;multivesicular body, internal vesicle lumen;AP-2 adapto…	2.996	3.171	2.413	2.615	2.398	2.488	3.369	2.932	-0.733	-0.643	-1.094	-0.872
O00411	POLRMT	DNA-directed RNA polymerase, mitochondrial	transcription from mitochondrial promoter;transcription initiation from mitochondrial promoter;organelle organization;mitochondrion organization;gene expression;	mitochondrion;mitochondrial matrix;mitochondrial nucleoid;	2.77	3.024	3.105	3.406	2.688	2.659	2.945	2.854	-0.359	-0.329	-0.757	-0.452
P30260	CDC27	Cell division cycle protein 27 homolog	mitotic cell cycle;metaphase/anaphase transition of mitotic cell cycle;mitotic spindle assembly checkpoint;cell proliferation;anaphase-promoting complex-dependent proteasomal ubiquitin-dependent protein catabolic process;negative regulation of ubiquitin-protein ligase activity involved in mitotic cell cycle;positive regulation of ubiquitin-protein ligase activity involved in regulation of mitotic…	nucleus;nucleoplasm;anaphase-promoting complex;cytoplasm;centrosome;spindle;cytosol;spindle microtubule;	3.25	3.365	3.562	3.673	2.823	2.919	3.359	3.223	-0.517	-0.442	-0.783	-0.619
Q8NHQ9	DDX55	ATP-dependent RNA helicase DDX55	RNA secondary structure unwinding;	membrane;	2.466	2.563	3.772	3.953	2.366	2.446	2.792	2.699	-0.489	-0.43	-0.901	-0.745
Q8IZA0	KIAA0319L	Dyslexia-associated protein KIAA0319-like protein		integral component of membrane;cytoplasmic vesicle;extracellular exosome;	2.843	3.097	2.799	3.058	2.724	2.688	2.994	2.913	-0.125	-0.139	-0.57	-0.359
Q16555	DPYSL2	Dihydropyrimidinase-related protein 2	response to amphetamine;nucleobase-containing compound metabolic process;endocytosis;cytoskeleton organization;signal transduction;nervous system development;axon guidance;positive regulation of glutamate secretion;spinal cord development;olfactory bulb development;regulation of axon extension;response to cocaine;response to drug;synaptic vesicle transport;	mitochondrion;cytosol;dendrite;growth cone;neuronal cell body;terminal bouton;myelin sheath;extracellular exosome;microtubule;membrane;	3.042	3.214	2.886	2.907	2.654	2.705	3.499	3.453	-0.723	-0.783	-1.242	-0.982
P62140	PPP1CB	Serine/threonine-protein phosphatase PP1-beta catalytic subunit	G2/M transition of mitotic cell cycle;mitotic cell cycle;glycogen metabolic process;regulation of glycogen biosynthetic process;regulation of glycogen catabolic process;protein dephosphorylation;transforming growth factor beta receptor signaling pathway;small GTPase mediated signal transduction;triglyceride catabolic process;regulation of cell adhesion;negative regulation of transforming growth f…	protein phosphatase type 1 complex;nucleus;nucleoplasm;nucleolus;cytosol;focal adhesion;glycogen granule;extracellular exosome;MLL5-L complex;PTW/PP1 phosphatase complex;	3.101	3.43	3.098	3.381	2.885	2.98	3.618	3.475	-0.889	-0.795	-1.27	-1.022
[truncated: 1,263 more rows]

## Sheet: Tab 2. TPs and FPs for OMM RBPs
TP (Uniprot accession)	FP (Uniprot accession)
Q15785	P05165
P45880	P30048
P21796	Q07021
Q96HS1	P30084
O00571	P06576
O96008	P38117
P00387	P05091
P42345	Q16822
Q8IXI1	P00367
P19367	P30837
Q5VT66	Q8IYB8
Q96TC7	P49419
O94826	P13804
P57105	P04181
Q92667	Q15046
Q7Z434	Q9Y237
	Q02252
	Q8N163
	P41250
	O00411
	P11177
	Q99798
	O94925
	P08559
	Q9BW92
	Q6PI48
	Q5JRX3
	P30044
	Q9NSE4
	Q6L8Q7
	Q9Y2Z4
	P47897
	P00390
	P04637
	Q06830
	Q8NHU6

## Sheet: Tab 3. Column definition
Associated Tabs	Column name	Column definition
1	Uniprot accession	Uniprot accesion IDs for the protein group
[truncated: 18 more rows]

## Sheet: Tab 4. Table legend
Supplementary Dataset 4. The 11-plex TMT proteomics results for assigning OMM-localized RBPs. HEK cells stably expressing APEX2-OMM were treated with or without puromycin, and then subjected to proximity biotinylation and FA crosslinking. The control samples omitted H2O2, or FA. For assigning OMM-localized RBPs, a curated list of known OMM proteins was used as TPs and mitochondrial matrix protein…
