# Supplementary material for: Functional proximity mapping of RNA binding proteins uncovers a mitochondrial mRNA anchor that promotes stress recovery
Source: Research Square preprint supplement (doi:10.21203/rs.3.rs-103196/v1), 2020-11-12
Supplement: Supplementary file 5 [file e83b89c7d267373a4eb10a22.xlsx]

## Sheet: Tab 1. OMM RBP -PUR
Uniprot accession	Gene symbol	Protein name	GO molecular function	GO cellular component	OMM annotation (Hung V., et al.eLife. 2017.)	Sub-mitochondrial annotation	Mitochndrial annotation	Mito-ER contact annotation (Cho K., et al. PNAS. 2020.)	OOPS (Queiroz, R.M.L., et al. Nat. Biotech. 2019.)	OligodT pulldown (Queiroz, RML., et al Nat. Biotech. 2019)	XRANX (Trendel J.,et al. Cell. 2019)	OligodT Pulldown (Baltz AG.,et al. Mol Cell.2012)	CARIC (Huang R.,et al. PNAS.2019)	GO RNA binding	SerIC nucleus (Conrad T., et al. Nat. Commun. 2016)	RBD map (Castello A., et al. Mol Cell. 2016)	OligodT Pulldown (Castello A., et al. Cell. 2012)	OligodT Pulldown (Milek M, et al. Genome Res. 2017)	known RBP	polyA RBP	Ratio (+FA vs -FA), log2	Domain 1	Domain 2
Q15154	PCM1	Pericentriolar material 1 protein	protein binding|identical protein binding|	pericentriolar material;cytoplasm;centrosome;cytosol;membrane;nuclear membrane;centriolar satellite;ciliary basal body;protein complex;0nmotile primary cilium;centrosome;	0	N/A	0	0	1	0	1	0	0	0	0	0	0	0	Known	Non-polyA	3.285	PCM1_C	N/A
Q00325	SLC25A3	Phosphate carrier protein, mitochondrial	symporter activity|phosphate ion carrier activity|protein complex binding|	mitochondrion;mitochondrial inner membrane;integral component of plasma membrane;membrane;myelin sheath;extracellular exosome;	0	IMM	1	0	1	0	1	0	1	0	0	0	0	0	Known	Non-polyA	3.0085	Mito_carr*3	N/A
Q14318	FKBP8	Peptidyl-prolyl cis-trans isomerase FKBP8	peptidyl-prolyl cis-trans isomerase activity|protein binding|FK506 binding|identical protein binding|metal ion binding|	cytoplasm;endoplasmic reticulum membrane;membrane;integral component of endoplasmic reticulum membrane;mitochondrial membrane;	0	N/A	1	1	1	0	0	0	0	0	0	0	0	0	Known	Non-polyA	3.1005	FKBP_C	N/A
P02794	FTH1	Ferritin heavy chain	ferroxidase activity|iron ion binding|protein binding|ferric iron binding|	nucleus;cytosol;intracellular ferritin complex;extracellular exosome;	0	N/A	1	0	1	0	1	0	0	0	0	0	0	0	Known	Non-polyA	3.2395	Ferritin	N/A
Q4AC94	C2CD3	C2 domain-containing protein 3	protein binding|	centrosome;centriole;cytosol;centriolar satellite;ciliary basal body;	1	N/A	1	0	0	1	0	0	0	0	0	0	0	0	Known	polyA	2.5555	C2*3	N/A
P35232	PHB	Prohibitin	sequence-specific DNA binding RNA polymerase II transcription factor activity|complement component C3a binding|complement component C3b binding|protein binding|protein C-terminus binding|enzyme binding|proteinase activated receptor binding|histone deacetylase binding|transcription regulatory region DNA binding|	nucleus;nucleoplasm;cytoplasm;mitochondrion;mitochondrial inner membrane;early endosome;plasma membrane;integral component of plasma membrane;cell surface;membrane;myelin sheath;extracellular exosome;	0	IMM	1	0	1	0	0	0	1	0	0	0	0	0	Known	Non-polyA	3.392	Band 7	N/A
Q9UH62	ARMCX3	Armadillo repeat-containing X-linked protein 3	N/A	integral component of mitochondrial outer membrane;	1	N/A	1	1	0	0	0	0	0	0	0	0	0	0	Known	Non-polyA	2.7845	Arm 2	N/A
Q92667	AKAP1	A-kinase anchor protein 1, mitochondrial	RNA binding|protein binding|microtubule binding|protein kinase binding|protein domain specific binding|protein phosphatase 2B binding|protein complex scaffold|protein kinase A regulatory subunit binding|poly(A) RNA binding|beta-tubulin binding|	mitochondrion;mitochondrial outer membrane;mitochondrial matrix;lipid particle;cytosol;membrane;integral component of membrane;mitochondrial crista;neuromuscular junction;postsynaptic membrane;	0	OMM	1	1	1	1	1	1	0	1	0	0	1	1	Known	polyA	3.6525	KH_1	TUDOR
O94826	TOMM70	Mitochondrial import receptor subunit TOM70	protein binding|protein transmembrane transporter activity|	mitochondrion;mitochondrial outer membrane translocase complex;membrane;integral component of membrane;extracellular exosome;	0	N/A	1	0	1	0	0	0	0	0	0	0	0	0	Known	Non-polyA	3.111	TPR1	TPR8*4
A0A0A0MRK6	MTX1	Metaxin 1, isoform CRA_b	N/A	mitochondrial outer membrane;mitochondrial inner membrane;	1	N/A	1	0	0	0	0	0	0	0	0	0	0	0	Orphan	Non-polyA	2.6895	GST_C_6	TOM37
F1T0I1	SEC16A	Protein transport protein sec16	N/A	Golgi membrane;	0	N/A	0	0	0	0	0	0	0	0	0	0	0	0	Orphan	Non-polyA	3.241	Sec16	Sec16_C
Q96TC7	RMDN3	Regulator of microtubule dynamics protein 3	protein binding|	spindle pole;nucleus;mitochondrion;mitochondrial outer membrane;microtubule;integral component of membrane;	0	OMM	1	0	0	0	0	0	0	0	0	0	0	0	Orphan	Non-polyA	2.9875	N/A	N/A
Q96M89	CCDC138	Coiled-coil domain-containing protein 138	N/A	N/A	0	N/A	0	0	0	0	0	0	0	0	0	0	0	0	Orphan	Non-polyA	3.7145	N/A	N/A
Q5VT66	MAR C 1	Mitochondrial amidoxime-reducing component 1	nitrate reductase activity|molybdenum ion binding|pyridoxal phosphate binding|molybdopterin cofactor binding|	mitochondrion;mitochondrial outer membrane;mitochondrial inner membrane;integral component of membrane;	0	OMM	1	0	0	0	0	0	0	0	0	0	0	0	Orphan	Non-polyA	3.179	MOSC_N	MOSC
P19367	HK1	Hexokinase-1	glucokinase activity|hexokinase activity|protein binding|ATP binding|glucose binding|fructokinase activity|man0kinase activity|	mitochondrion;mitochondrial outer membrane;cytosol;membrane raft;sperm principal piece;	1	OMM	1	0	1	0	0	0	0	0	0	0	0	0	Known	Non-polyA	2.9635	Hexokinase_1*2	Hexokinase_2*2
P08670	VIM	Vimentin	glycoprotein binding|double-stranded RNA binding|structural constituent of cytoskeleton|structural constituent of eye lens|protein binding|protein C-terminus binding|identical protein binding|scaffold protein binding|keratin filament binding|	cytoplasm;peroxisome;cytosol;cytoskeleton;intermediate filament;focal adhesion;cell leading edge;neuron projection;intermediate filament cytoskeleton;extracellular exosome;plasma membrane;	0	N/A	0	0	0	0	1	0	1	1	0	1	0	0	Known	polyA	2.1815	Filament	Filament_head
Q8IXI1	RHOT2	Mitochondrial Rho GTPase 2	GTPase activity|calcium ion binding|protein binding|GTP binding|	cytosol;plasma membrane;membrane;integral component of mitochondrial outer membrane;extracellular exosome;	1	N/A	1	1	1	0	0	0	0	0	0	0	0	0	Known	Non-polyA	2.9705	Ras	EF_assoc_1
Q16531	DDB1	DNA damage-binding protein 1	DNA binding|protein binding|damaged DNA binding|	extracellular space;nucleus;nucleoplasm;cytoplasm;Cul4A-RING E3 ubiquitin ligase complex;Cul4B-RING E3 ubiquitin ligase complex;extracellular exosome;Cul4-RING E3 ubiquitin ligase complex;	0	N/A	0	0	1	0	1	0	0	0	0	0	0	0	Known	Non-polyA	3.109	MMS1_N	CPSF_A
Q86VP1	TAX1BP1	Tax1-binding protein 1	protein binding|kinase binding|metal ion binding|	cytosol;extracellular exosome;	0	N/A	0	0	0	0	0	0	0	0	0	0	0	0	Orphan	Non-polyA	2.656	SKICH	CALCOCO1
P57105	SYNJ2BP	Synaptojanin-2-binding protein	protein binding|protein C-terminus binding|type II activin receptor binding|	mitochondrion;cell surface;integral component of mitochondrial outer membrane;	1	N/A	1	0	0	0	0	0	0	0	0	0	0	0	Orphan	Non-polyA	2.77	PDZ	N/A
Q8NAN2	MIGA1	Mitoguardin 1	N/A	integral component of membrane;	0	N/A	1	1	0	0	0	0	0	0	0	0	0	0	Known	Non-polyA	3.174	Miga	N/A
Q9BWH2	FUNDC2	FUN14 domain-containing protein 2	N/A	nucleus;mitochondrion;integral component of mitochondrial outer membrane;	1	N/A	1	1	0	0	0	0	0	0	0	0	0	0	Known	Non-polyA	2.0925	Fun14	N/A
Q7Z434	MAVS	Mitochondrial antiviral-signaling protein	signal transducer activity|protein binding|protein kinase binding|CARD domain binding|	mitochondrion;mitochondrial outer membrane;peroxisomal membrane;integral component of membrane;mitochondrial membrane;	1	OMM	1	1	1	0	0	0	0	0	0	0	0	0	Known	Non-polyA	3.3945	CARD_2	N/A
Q9BXK5	BCL2L13	Bcl-2-like protein 13	protein binding|cysteine-type endopeptidase activator activity involved in apoptotic process|	nucleus;mitochondrion;integral component of membrane;mitochondrial membrane;	1	N/A	1	0	0	0	0	0	0	0	0	0	0	0	Orphan	Non-polyA	3.0545	Bcl	N/A
M0R1A7	RPL18A	60S ribosomal protein L18a	structural constituent of ribosome|	ribosome;	0	N/A	0	0	0	0	0	1	0	0	0	0	1	1	Known	polyA	3.4715	Ribosomal_L18A	N/A
Q9NVH0	EXD2	Exonuclease 3'-5' domain-containing protein 2	nucleic acid binding|3'-5' exonuclease activity|	nucleus;cytoplasm;	1	N/A	1	1	0	0	0	0	0	0	0	0	0	1	Known	polyA	2.9545	DNA_pol_A_exo1	N/A
Q49A88	CCDC14	Coiled-coil domain-containing protein 14	protein binding|	centrosome;	0	N/A	0	0	1	0	0	0	0	0	0	0	0	0	Known	Non-polyA	3.0645	CCDC14	N/A

## Sheet: Tab 2. OMM RBP +PUR
Uniprot accession	Gene symbol	Protein name	GO molecular function	GO cellular component	OMM annotation (Hung V., et al.eLife. 2017.)	Sub-mitochondrial annotation	Mitochndrial annotation	Mito-ER contact annotation (Cho K., et al. PNAS. 2020.)	OOPS (Queiroz, R.M.L., et al. Nat. Biotech. 2019.)	OligodT pulldown (Queiroz, RML., et al Nat. Biotech. 2019)	XRANX (Trendel J.,et al. Cell. 2019)	OligodT Pulldown (Baltz AG.,et al. Mol Cell.2012)	CARIC (Huang R.,et al. PNAS.2019)	GO RNA binding	SerIC nucleus (Conrad T., et al. Nat. Commun. 2016)	RBD map (Castello A., et al. Mol Cell. 2016)	OligodT Pulldown (Castello A., et al. Cell. 2012)	OligodT Pulldown (Milek M, et al. Genome Res. 2017)	known RBP	polyA RBP	Ratio (+FA vs -FA), log2	Domain 1	Domain 2
P08670	VIM	Vimentin	glycoprotein binding|double-stranded RNA binding|structural constituent of cytoskeleton|structural constituent of eye lens|protein binding|protein C-terminus binding|identical protein binding|scaffold protein binding|keratin filament binding|	cytoplasm;peroxisome;cytosol;cytoskeleton;intermediate filament;focal adhesion;cell leading edge;neuron projection;intermediate filament cytoskeleton;extracellular exosome;plasma membrane;	0	N/A	0	0	0	0	1	0	1	1	0	1	0	0	Known	polyA	2.1815	Filament	Filament_head
P19367	HK1	Hexokinase-1	glucokinase activity|hexokinase activity|protein binding|ATP binding|glucose binding|fructokinase activity|man0kinase activity|	mitochondrion;mitochondrial outer membrane;cytosol;membrane raft;sperm principal piece;	1	OMM	1	0	1	0	0	0	0	0	0	0	0	0	Known	Non-poly A	2.9635	Hexokinase_1*2	Hexokinase_2*2
Q5VT66	MAR C1	Mitochondrial amidoxime-reducing component 1	nitrate reductase activity|molybdenum ion binding|pyridoxal phosphate binding|molybdopterin cofactor binding|	mitochondrion;mitochondrial outer membrane;mitochondrial inner membrane;integral component of membrane;	0	OMM	1	0	0	0	0	0	0	0	0	0	0	0	Orphan	Non-poly A	3.179	MOSC_N	MOSC
P00387	CYB5R3	NADH-cytochrome b5 reductase 3	cholesterol biosynthetic process;vitamin metabolic process;water-soluble vitamin metabolic process;blood circulation;L-ascorbic acid metabolic process;small molecule metabolic process;oxidation-reduction process;	cytoplasm;mitochondrion;mitochondrial outer membrane;mitochondrial inner membrane;endoplasmic reticulum;endoplasmic reticulum membrane;lipid particle;hemoglobin complex;membrane;extracellular exosome;	1	OMM	1	0	1	0	1	0	0	0	0	0	0	0	Known	Non-poly A	3.0215	FAD_binding_6	NAD_binding_1
O94826	TOMM70	Mitochondrial import receptor subunit TOM70	protein binding|protein transmembrane transporter activity|	mitochondrion;mitochondrial outer membrane translocase complex;membrane;integral component of membrane;extracellular exosome;	0	N/A	1	0	1	0	0	0	0	0	0	0	0	0	Known	Non-poly A	3.111	TPR1	TPR8*4
Q92667	AKAP1	A-kinase anchor protein 1, mitochondrial	RNA binding|protein binding|microtubule binding|protein kinase binding|protein domain specific binding|protein phosphatase 2B binding|protein complex scaffold|protein kinase A regulatory subunit binding|poly(A) RNA binding|beta-tubulin binding|	mitochondrion;mitochondrial outer membrane;mitochondrial matrix;lipid particle;cytosol;membrane;integral component of membrane;mitochondrial crista;neuromuscular junction;postsynaptic membrane;	1	OMM	1	1	1	1	1	1	0	1	0	0	1	1	Known	polyA	3.6525	KH_1	TUDOR
Q9BXK5	BCL2L13	Bcl-2-like protein 13	protein binding|cysteine-type endopeptidase activator activity involved in apoptotic process|	nucleus;mitochondrion;integral component of membrane;mitochondrial membrane;	1	N/A	1	0	0	0	0	0	0	0	0	0	0	0	Orphan	Non-poly A	3.0545	Bcl	N/A
Q7Z434	MAVS	Mitochondrial antiviral-signaling protein	signal transducer activity|protein binding|protein kinase binding|CARD domain binding|	mitochondrion;mitochondrial outer membrane;peroxisomal membrane;integral component of membrane;mitochondrial membrane;	1	OMM	1	1	1	0	0	0	0	0	0	0	0	0	Known	Non-poly A	3.3945	CARD_2	N/A
Q9BWH2	FUNDC2	FUN14 domain-containing protein 2	N/A	nucleus;mitochondrion;integral component of mitochondrial outer membrane;	1	N/A	1	1	0	0	0	0	0	0	0	0	0	0	Known	Non-poly A	2.0925	Fun14	N/A
Q8NAN2	MIGA1	Mitoguardin 1	N/A	integral component of membrane;	0	N/A	1	1	0	0	0	0	0	0	0	0	0	0	Known	Non-poly A	3.174	Miga	N/A
P57105	SYNJ2BP	Synaptojanin-2-binding protein	protein binding|protein C-terminus binding|type II activin receptor binding|	mitochondrion;cell surface;integral component of mitochondrial outer membrane;	1	N/A	1	0	0	0	0	0	0	0	0	0	0	0	Orphan	Non-poly A	2.77	PDZ	N/A
Q96TC7	RMDN3	Regulator of microtubule dynamics protein 3	protein binding|	spindle pole;nucleus;mitochondrion;mitochondrial outer membrane;microtubule;integral component of membrane;	0	OMM	1	0	0	0	0	0	0	0	0	0	0	0	Orphan	Non-poly A	2.9875	N/A	N/A
Q96M89	CCDC138	Coiled-coil domain-containing protein 138	N/A	N/A	0	N/A	0	0	0	0	0	0	0	0	0	0	0	0	Orphan	Non-poly A	3.7145	N/A	N/A

## Sheet: Tab 3. Column definition
Associated Tabs	Column name	Column definition
1,2	Uniprot accession	Uniprot accesion IDs for the protein group
	Gene symbol	Gene symbols and synonyms
	Protein name	Protein name
	GO molecular function	The GO molecular function terms. N/A indicates not available.
	GO cellular component	The GO cellular component terms. N/A indicates not available.
	known RBP	The RBPs identified by at least one RBP dataset.
	OOPS (Queiroz, R.M.L., et al. Nat. Biotech. 2019)	The RBPs identified by OOPS in Queiroz, R.M.L., et al. Nat. Biotech. 2019. 1 if yes, 0 if no.
	OligodT pulldown (Queiroz, RML., et al Nat. Biotech. 2019)	The RBPs identified by oligodT pulldown in Queiroz, R.M.L., et al. Nat. Biotech. 2019. 1 if yes, 0 if no.
	XRANX (Trendel J.,et al. Cell. 2019)	The RBPs identified by XRANX in Trendel J.,et al. Cell. 2019. 1 if yes, 0 if no.
	OligodT Pulldown (Baltz AG.,et al. Mol Cell.2012)	The RBPs identified by oligodT pulldown in Baltz AG.,et al. Mol Cell.2012. 1 if yes, 0 if no.
	CARIC (Huang R.,et al. PNAS.2019)	The RBPs identified by CARIC in Huang R.,et al. PNAS.2019. 1 if yes, 0 if no.
	GO RNA binding	The RBPs annotated by GO. 1 if yes, 0 if no.
	SerIC nucleus	The nuclear RBPs identified by SerIC in Conrad T., et al. Nat. Commun. 2016. 1 if yes, 0 if no.
	RBD map (Castello A., et al. Mol Cell. 2016)	The RBPs identified by OligodT based RBD profiling in Castello A., et al. Mol Cell. 2016. 1 if yes, 0 if no.
	OligodT Pulldown (Castello A., et al. Cell. 2012)	The RBPs identified by oligodT pulldown in Castello A., et al. Cell. 2012. 1 if yes, 0 if no.
	OligodT Pulldown (Milek M, et al. Genome Res. 2017)	The RBPs identified by oligodT pulldown in Milek M, et al. Genome Res. 2017. 1 if yes, 0 if no.
	polyA RBP	The RBPs identified by at least one RBP dataset.
	Ratio (+FA vs -FA), log2	The mean TMT ratio of FA crosslinking samples compared to the non-crosslinking samples.
	Domain 1	The first domain of RBP. N/A indicates not available.
	Domain 2	The second domain of RBP. N/A indicates not available.
	OMM annotation (Hung V., et al.eLife. 2017.)	The RBPs annotaetd as OMM proteins by APEX2-OMM profiling. 1 if yes, 0 if no.
	Sub-mitochondrial annotation	The RBPs annotaetd as OMM and IMM proteins according to GOCC. N/A indicates not available.
	Mitochndrial annotation	The RBPs annotaetd as mitochondrial proteins by a currated list. 1 if yes, 0 if no.
	Mito-ER contact annotation (Cho K., et al. PNAS. 2020.)	The RBPs invlolved in mitochondrial-ER contacts according to split-TurboID profiling. 1 if yes, 0 if no.

## Sheet: Tab 4. Table legend
Supplementary Dataset 5. The lists of OMM-localized RBPs under basal and PUR conditions. The final OMM-localized RBPs under basal and PUR conditions are listed in Tab 1 and Tab 2 respectively. The OMM RBPs were compared with 10 different RBP datasets. The RBPs identified by at least one dataset were assigned as known RBPs and the remaining ones were assigned as RBP orphans. The RBPs identified by…
