# Supplementary material for: Functional proximity mapping of RNA binding proteins uncovers a mitochondrial mRNA anchor that promotes stress recovery
Source: Research Square preprint supplement (doi:10.21203/rs.3.rs-103196/v1), 2020-11-12
Supplement: Supplementary file 6 [file f444f1e2c16918580232fa59.xlsx]

## Sheet: Tab 1. nucleolar RBP list
Uniprot accession	Gene symbol	Protein name	GO molecular function	GO cellular component	OOPS (Queiroz, R.M.L., et al. Nat. Biotech. 2019.)	OligodT pulldown (Queiroz, RML., et al Nat. Biotech. 2019)	XRANX (Trendel J.,et al. Cell. 2019)	OligodT Pulldown (Baltz AG.,et al. Mol Cell.2012)	CARIC (Huang R.,et al. PNAS.2019)	GO RNA binding	SerIC nucleus (Conrad T., et al. Nat. Commun. 2016)	RBD map (Castello A., et al. Mol Cell. 2016)	OligodT Pulldown (Castello A., et al. Cell. 2012)	OligodT Pulldown (Milek M, et al. Genome Res. 2017)	known RBP	polyA RBP	RNA types	Domain 1	Domain 2	Domain 3	Domain 4	Domain 5	Domain 6	Domain 7	Domain 8
P15927	Rpa2	Replication protein A 32 kDa subunit	damaged DNA binding|single-stranded DNA binding|protein binding|enzyme binding|protein phosphatase binding|ubiquitin protein ligase binding|protein N-terminus binding|	chromatin|nucleus|nucleoplasm|DNA replication factor A complex|PML body|chromosome, telomeric region|PML body|site of double-strand break|	0	0	0	0	0	0	0	0	0	0	Orphan	Non-polyA	N/A	RPA_C	N/A	N/A	N/A	N/A	N/A	N/A	N/A
Q9NZ63	C9orf78	Telomere length and silencing protein 1 homolog	N/A	nucleoplasm|cytoplasm|	0	0	0	0	0	0	0	0	0	0	Orphan	Non-polyA	N/A	Hep_59	N/A	N/A	N/A	N/A	N/A	N/A	N/A
Q08211	Dhx9	ATP-dependent RNA helicase A	RNA polymerase II transcription factor binding|DNA binding|RNA helicase activity|ATP-dependent DNA helicase activity|ATP-dependent RNA helicase activity|protein binding|ATP binding|poly(A) RNA binding|	nucleus|nucleoplasm|nucleolus|cytoplasm|centrosome|cytosol|membrane|ribonucleoprotein complex|cytoplasmic ribonucleoprotein granule|CRD-mediated mRNA stability complex|	1	1	1	1	1	1	1	1	1	1	known	polyA	N/A	dsrm*2	DEAD	Helicase_C	HA2	OB_NTP_bind	N/A	N/A	N/A
O15226	Nkrf	NF-kappa-B-repressing factor	DNA binding|protein binding|poly(A) RNA binding|	nucleus|nucleolus|endoplasmic reticulum|	1	1	1	1	1	0	1	0	1	1	known	polyA	N/A	G-patch	R3H	N/A	N/A	N/A	N/A	N/A	N/A
P61289	Psme3	Proteasome activator complex subunit 3	p53 binding|protein binding|identical protein binding|endopeptidase activator activity|MDM2/MDM4 family protein binding|	proteasome complex|nucleus|nucleoplasm|cytoplasm|cytosol|proteasome activator complex|membrane|	0	0	0	0	0	0	0	0	0	0	Orphan	Non-polyA	N/A	PA28_alpha	PA28_beta	N/A	N/A	N/A	N/A	N/A	N/A
Q9H0D6	Xrn2	5'-3' exoribonuclease 2	transcription termination site sequence-specific DNA binding|nuclease activity|5'-3' exoribonuclease activity|zinc ion binding|5'-3' exonuclease activity|poly(A) RNA binding|	nucleus|nucleolus|membrane|aggresome|	1	1	1	1	1	0	1	0	1	1	known	polyA	N/A	XRN_N	N/A	N/A	N/A	N/A	N/A	N/A	N/A
Q14320	Fam50a	Protein FAM50A	poly(A) RNA binding|	nucleus|nucleoplasm|	0	0	1	1	0	0	0	0	0	0	known	polyA	N/A	XAP5	N/A	N/A	N/A	N/A	N/A	N/A	N/A
P07737	Pfn1	Profilin-1	adenyl-nucleotide exchange factor activity|actin binding|actin monomer binding|protein binding|phosphatidylinositol-4,5-bisphosphate binding|Rho GTPase binding|poly(A) RNA binding|proline-rich region binding|	nucleus|cytoplasm|cytosol|cytoskeleton|focal adhesion|cell cortex|membrane|extracellular exosome|blood microparticle|	1	0	1	1	1	0	0	0	0	0	known	polyA	N/A	Profilin	N/A	N/A	N/A	N/A	N/A	N/A	N/A
Q12906-7	Ilf3	Isoform 7 of Interleukin enhancer-binding factor 3	DNA binding|RNA binding|double-stranded RNA binding|protein binding|poly(A) RNA binding|	nucleus|nucleoplasm|nucleolus|cytoplasm|mitochondrion|membrane|ribonucleoprotein complex|	0	0	0	1	1	1	1	1	1	1	known	polyA	N/A	DZF	dsrm*2	N/A	N/A	N/A	N/A	N/A	N/A
P13984	Gtf2f2	General transcription factor IIF subunit 2	core RNA polymerase II binding transcription factor activity|DNA binding|helicase activity|protein binding|ATP binding|	nucleus|nucleoplasm|transcription factor TFIIF complex|holo TFIIH complex|microtubule cytoskeleton|	0	0	0	0	0	0	0	0	0	0	Orphan	Non-polyA	N/A	TFIIF_beta_N	TFIIF_beta	N/A	N/A	N/A	N/A	N/A	N/A
O75940	Smndc1	Survival of motor neuron-related-splicing factor 30	protein binding|poly(A) RNA binding|	nucleus|nucleoplasm|spliceosomal complex|cytoplasm|Cajal body|nuclear speck|intermediate filament cytoskeleton|	1	0	1	0	0	1	0	0	1	0	known	polyA	N/A	SMN	N/A	N/A	N/A	N/A	N/A	N/A	N/A
P55265	Adar	Double-stranded RNA-specific adenosine deaminase	DNA binding|double-stranded RNA adenosine deaminase activity|protein binding|poly(A) RNA binding|metal ion binding|	nucleus|nucleoplasm|nucleolus|cytoplasm|membrane|supraspliceosomal complex|	1	1	1	1	1	1	1	1	1	1	known	polyA	N/A	z-alpha	dsrm*3	A deamin	z-alpha	N/A	N/A	N/A	N/A
P55081	Mfap1	Microfibrillar-associated protein 1	protein binding|poly(A) RNA binding|	microfibril|extracellular region|	1	0	1	1	0	0	1	0	1	1	known	polyA	N/A	Mfap1	N/A	N/A	N/A	N/A	N/A	N/A	N/A
P17482	Hoxb9	Homeobox protein Hox-B9	protein binding|sequence-specific DNA binding|	nucleoplasm|mitochondrion|	0	0	0	0	0	0	0	0	0	0	Orphan	Non-polyA	N/A	Hox9_act	Homeodomain	N/A	N/A	N/A	N/A	N/A	N/A
P23193	Tcea1	Transcription elongation factor A protein 1	DNA binding|protein binding|zinc ion binding|	nucleus|nucleoplasm|nucleolus|	1	0	1	0	0	0	0	1	0	0	known	polyA	N/A	Med26	TFIIS_M	TFIIS_C	N/A	N/A	N/A	N/A	N/A
P35080	Pfn2	Profilin-2	adenyl-nucleotide exchange factor activity|actin monomer binding|protein binding|phosphatidylinositol-4,5-bisphosphate binding|	cytoplasm|cytoskeleton|terminal bouton|extracellular exosome|	1	0	0	0	0	0	0	0	0	0	Known	Non-polyA	N/A	Profilin	N/A	N/A	N/A	N/A	N/A	N/A	N/A
P24666	Acp1	Low molecular weight phosphotyrosine protein phosphatase	acid phosphatase activity|non-membrane spanning protein tyrosine phosphatase activity|protein binding|	cytoplasm|cytoplasmic side of plasma membrane|extracellular exosome|	1	0	0	0	0	0	0	0	0	0	Known	Non-polyA	N/A	LMWPc	N/A	N/A	N/A	N/A	N/A	N/A	N/A
O43684	Bub3	Mitotic checkpoint protein BUB3	protein binding|	kinetochore|condensed chromosome kinetochore|nucleoplasm|cytosol|	1	0	1	0	1	0	0	0	0	0	Known	Non-polyA	N/A	WD40*3	N/A	N/A	N/A	N/A	N/A	N/A	N/A
Q12905	Ilf2	Interleukin enhancer-binding factor 2	DNA binding|double-stranded RNA binding|protein binding|ATP binding|transferase activity|poly(A) RNA binding|	nucleus|nucleoplasm|nucleolus|cytoplasm|membrane|ribonucleoprotein complex|	1	1	1	1	1	1	1	1	1	1	known	polyA	N/A	DZF	N/A	N/A	N/A	N/A	N/A	N/A	N/A
Q9BXP5	Srrt	Serrate RNA effector molecule homolog	DNA binding|protein binding|poly(A) RNA binding|	nucleus|nucleoplasm|cytoplasm|	1	1	1	1	1	0	1	0	1	1	known	polyA	N/A	DUF3546	ARS2	N/A	N/A	N/A	N/A	N/A	N/A
Q8N9T8	Kri1	Protein KRI1 homolog	poly(A) RNA binding|	nucleolus|	1	1	1	0	0	0	0	0	1	1	known	polyA	N/A	Kri1	Kri1_C	N/A	N/A	N/A	N/A	N/A	N/A
O75832	Psmd10	26S proteasome non-ATPase regulatory subunit 10	protein binding|transcription factor binding|	proteasome complex|nucleus|nucleoplasm|cytoplasm|cytosol|proteasome regulatory particle|intermediate filament cytoskeleton|proteasome regulatory particle, base subcomplex|	0	0	0	0	0	0	0	0	0	0	Orphan	Non-polyA	N/A	Ank2*2	Ank4*2	N/A	N/A	N/A	N/A	N/A	N/A
Q53EL6	Pdcd4	Programmed cell death protein 4	RNA binding|protein binding|	nucleus|nucleoplasm|cytoplasm|cytosol|	1	0	1	0	0	1	0	0	0	0	Known	Non-polyA	mRNA (Fehler O., et al. Nucleic. Acids. Res. 2014.)	MA3*2	N/A	N/A	N/A	N/A	N/A	N/A	N/A
Q9H814	Phax	Phosphorylated adapter RNA export protein	RNA binding|toxic substance binding|	nucleus|nucleoplasm|nucleolus|cytosol|Cajal body|neuronal cell body|intracellular membrane-bounded organelle|	0	0	0	0	0	1	0	0	0	0	Known	Non-polyA	snoRNA (Boulon S., et al. Mol. Cell. 2004.)	RNA_GG_bind	N/A	N/A	N/A	N/A	N/A	N/A	N/A
Q1ED39	Knop1	Lysine-rich nucleolar protein 1	poly(A) RNA binding|	nucleolus|	1	0	1	0	0	0	0	0	0	0	Known	Non-polyA	N/A	SMAP	N/A	N/A	N/A	N/A	N/A	N/A	N/A
Q6IQ49	Sde2	Replication stress response regulator SDE2	N/A	nucleus|	1	0	0	0	0	0	0	0	0	0	Known	Non-polyA	pre-mRNA (Thakran P., et al. EMBO J. 2018.)	Sde2_N_Ubi	Telomere_Sde2_2	N/A	N/A	N/A	N/A	N/A	N/A
O43663	Prc1	Protein regulator of cytokinesis 1	protein binding|microtubule binding|kinesin binding|protein kinase binding|identical protein binding|	spindle pole|nucleus|nucleoplasm|cytoplasm|spindle|cytosol|spindle microtubule|plasma membrane|microtubule cytoskeleton|	1	0	1	0	0	0	0	0	0	0	Known	Non-polyA	N/A	MAP65_ASE1	N/A	N/A	N/A	N/A	N/A	N/A	N/A
Q9UBU9	Nxf1	Nuclear RNA export factor 1	nucleotide binding|single-stranded RNA binding|protein binding|poly(A) RNA binding|	nucleus|nucleoplasm|cytosol|nuclear speck|transcription export complex|	1	0	1	1	1	1	0	0	1	1	known	polyA	N/A	Tap-RNA_bind	LRR_1	NTF2	TAP_C	N/A	N/A	N/A	N/A
Q8NDF8	Papd5	Non-canonical poly(A) RNA polymerase PAPD5	DNA binding|DNA-directed DNA polymerase activity|polynucleotide adenylyltransferase activity|poly(A) RNA binding|metal ion binding|	nucleolus|cytoplasm|	0	1	1	1	0	0	0	0	1	0	known	polyA	N/A	NTP_transf_2	PAP_assoc	N/A	N/A	N/A	N/A	N/A	N/A
Q8N8A6	Ddx51	ATP-dependent RNA helicase DDX51	ATP-dependent RNA helicase activity|ATP binding|poly(A) RNA binding|	nucleolus|membrane|	1	1	1	1	1	1	1	0	1	1	known	polyA	N/A	DEAD	Helicase_C	N/A	N/A	N/A	N/A	N/A	N/A
O95793	Stau1	Double-stranded RNA-binding protein Staufen homolog 1	double-stranded RNA binding|protein binding|protein phosphatase 1 binding|poly(A) RNA binding|	cytoplasm|endoplasmic reticulum|rough endoplasmic reticulum|microtubule associated complex|plasma membrane|cytoplasmic stress granule|membrane|dendrite|cytoplasmic ribonucleoprotein granule|neuronal cell body|cell body|extracellular exosome|	1	1	1	1	0	1	0	0	0	0	known	polyA	N/A	dsrm*3	Staufen_C	N/A	N/A	N/A	N/A	N/A	N/A
Q9H5H4	Znf768	Zinc finger protein 768	DNA binding|poly(A) RNA binding|metal ion binding|	DNA-directed RNA polymerase II, core complex|	0	0	1	1	0	0	0	0	0	0	known	polyA	N/A	RNA_pol_Rpb1_R*4	zf-C2H2*10	N/A	N/A	N/A	N/A	N/A	N/A
Q9BZZ5	Api5	Apoptosis inhibitor 5	protein binding|fibroblast growth factor binding|poly(A) RNA binding|	nucleus|nucleoplasm|spliceosomal complex|cytoplasm|membrane|	1	1	1	1	1	1	1	0	1	0	known	polyA	N/A	API5	N/A	N/A	N/A	N/A	N/A	N/A	N/A
A0A0A0MQR2	RTF2	Protein RTF2 homolog	N/A	N/A	0	0	0	0	0	0	0	0	0	0	Orphan	Non-polyA	pre-mRNA (Sasaki T., et al. Genetics. 2015.)	Rtf2	N/A	N/A	N/A	N/A	N/A	N/A	N/A
O43813	Lancl1	LanC-like protein 1	catalytic activity|G-protein coupled receptor activity|protein binding|zinc ion binding|SH3 domain binding|glutathione binding|low-density lipoprotein particle receptor binding|	nucleus|cytoplasm|extracellular exosome|integral component of plasma membrane|	0	0	0	0	0	0	0	0	0	0	Orphan	Non-polyA	N/A	LANC_like	N/A	N/A	N/A	N/A	N/A	N/A	N/A
F2Z2W7	Trmt2a	tRNA (uracil-5-)-methyltransferase homolog A	nucleotide binding|nucleic acid binding|RNA methyltransferase activity|	N/A	0	0	0	0	0	1	1	0	1	0	known	polyA	N/A	Methyltransf_31	N/A	N/A	N/A	N/A	N/A	N/A	N/A
O43148	Rnmt	mRNA cap guanine-N7 methyltransferase	RNA binding|mRNA (guanine-N7-)-methyltransferase activity|protein binding|	nucleus|nucleoplasm|nucleolus|mRNA cap binding complex|receptor complex|	0	0	1	0	0	1	0	0	0	1	known	polyA	N/A	Pox_MCEL	N/A	N/A	N/A	N/A	N/A	N/A	N/A
Q76FK4	Nol8	Nucleolar protein 8	nucleotide binding|protein binding|poly(A) RNA binding|	nucleus|nucleolus|cytoplasm|	1	1	1	1	0	1	1	0	1	0	known	polyA	N/A	RRM 1	N/A	N/A	N/A	N/A	N/A	N/A	N/A
Q96EU6	Rrp36	Ribosomal RNA processing protein 36 homolog	poly(A) RNA binding|	nucleus|nucleolus|90S preribosome|	1	1	1	1	0	0	1	0	1	1	known	polyA	N/A	Rrp36	N/A	N/A	N/A	N/A	N/A	N/A	N/A
Q8WXX5	Dnajc9	DnaJ homolog subfamily C member 9	N/A	nucleus|	0	0	1	0	0	0	0	0	0	0	Known	Non-polyA	N/A	Dnaj	N/A	N/A	N/A	N/A	N/A	N/A	N/A
Q9H501	Esf1	ESF1 homolog	poly(A) RNA binding|	extracellular space|nucleoplasm|nucleolus|	1	1	1	1	0	1	0	0	1	1	known	polyA	N/A	NUC153	N/A	N/A	N/A	N/A	N/A	N/A	N/A
Q15366	Pcbp2	Poly(rC)-binding protein 2	DNA binding|RNA binding|protein binding|enzyme binding|ubiquitin protein ligase binding|poly(A) RNA binding|	nucleus|nucleoplasm|cytoplasm|cytosol|focal adhesion|membrane|ribonucleoprotein complex|extracellular exosome|	1	1	1	1	1	1	1	1	1	0	known	polyA	N/A	KH_1*3	N/A	N/A	N/A	N/A	N/A	N/A	N/A
Q9NW82	Wdr70	WD repeat-containing protein 70	enzyme binding|	N/A	1	0	0	0	0	0	0	0	0	0	Known	Non-polyA	N/A	WD40*3	N/A	N/A	N/A	N/A	N/A	N/A	N/A
Q14331	Frg1	Protein FRG1	actin binding|protein binding|poly(A) RNA binding|	nucleolus|Cajal body|Z disc|catalytic step 2 spliceosome|	0	0	1	0	0	1	0	0	1	0	known	polyA	N/A	Frg1	N/A	N/A	N/A	N/A	N/A	N/A	N/A
Q9H5V9	CXorf56	UPF0428 protein CXorf56	N/A	N/A	0	0	0	0	0	0	0	0	0	0	Orphan	Non-polyA	N/A	N/A	N/A	N/A	N/A	N/A	N/A	N/A	N/A
Q13356	Ppil2	Peptidyl-prolyl cis-trans isomerase-like 2	peptidyl-prolyl cis-trans isomerase activity|protein binding|ligase activity|ubiquitin-ubiquitin ligase activity|ubiquitin protein ligase activity|	nucleus|nucleoplasm|cytoplasm|Golgi lumen|plasma membrane|	0	0	0	0	0	0	0	0	0	0	Orphan	Non-polyA	N/A	Pro_isomerase	N/A	N/A	N/A	N/A	N/A	N/A	N/A
O76003	Glrx3	Glutaredoxin-3	protein kinase C binding|protein binding|electron carrier activity|protein disulfide oxidoreductase activity|poly(A) RNA binding|metal ion binding|iron-sulfur cluster binding|	nucleus|cell cortex|Z disc|dendrite|extracellular exosome|	1	0	0	0	0	0	0	0	1	0	known	polyA	N/A	Thioredoxin	Glutaredoxin	N/A	N/A	N/A	N/A	N/A	N/A
Q96EY4	Tma16	Translation machinery-associated protein 16	protein binding|	nucleus|nucleolus|	1	0	1	0	0	0	0	0	0	0	Known	Non-polyA	mRNA (Gaudet P., et al. Brief. Bioinformatics. 2011.)	Tma16	N/A	N/A	N/A	N/A	N/A	N/A	N/A
Q96FZ2	Hmces	Embryonic stem cell-specific 5-hydroxymethylcytosine-binding protein	DNA binding|peptidase activity|	N/A	0	0	0	0	0	0	0	0	0	0	Orphan	Non-polyA	N/A	SRAP	N/A	N/A	N/A	N/A	N/A	N/A	N/A
Q8IX18	Dhx40	Probable ATP-dependent RNA helicase DHX40	ATP-dependent RNA helicase activity|ATP binding|poly(A) RNA binding|	cytoplasm|	0	0	1	0	0	1	0	0	0	0	Known	Non-polyA	mRNA (Xu J., et al. J. Hum. Genet. 2002.)	DEAD	Helicase C	HA2	OB_NTP_bind	N/A	N/A	N/A	N/A
Q96RS6	Nudcd1	NudC domain-containing protein 1	protein binding|	nucleus|nucleoplasm|cytoplasm|	0	0	0	0	0	0	0	0	0	0	Orphan	Non-polyA	N/A	CS	N/A	N/A	N/A	N/A	N/A	N/A	N/A
Q8WVD3	Rnf138	E3 ubiquitin-protein ligase RNF138	protein binding|zinc ion binding|ligase activity|protein kinase binding|ubiquitin conjugating enzyme binding|ubiquitin protein ligase activity|	nucleus|	0	0	0	0	0	0	0	0	0	0	Orphan	Non-polyA	N/A	zf-C3HC4_2	zf_C2HC_14	zf-Di19	N/A	N/A	N/A	N/A	N/A
P54132	Blm	Bloom syndrome protein	bubble DNA binding|p53 binding|single-stranded DNA binding|ATP-dependent DNA helicase activity|helicase activity|protein binding|ATP binding|ATP-dependent helicase activity|four-way junction helicase activity|ATPase activity|annealing helicase activity|ATP-dependent 3'-5' DNA helicase activity|G-quadruplex DNA binding|	nuclear chromosome|lateral element|male germ cell nucleus|nucleus|nucleoplasm|replication fork|nucleolus|cytoplasm|nuclear matrix|PML body|pronucleus|chromosome, telomeric region|PML body|	1	0	0	0	0	0	0	0	0	0	Known	Non-polyA	rRNA (Grierson P.M., et al. Hum. Mol. Genet. 2012.)	BLM_N	BDHCT	BDHCT_assoc	DEAD	Helicase C	RecQ_Zn_bind	RQC	HRDC
Q9NY61	Aatf	Protein AATF	sequence-specific DNA binding transcription factor activity|protein binding|leucine zipper domain binding|poly(A) RNA binding|tau protein binding|	nucleus|nucleolus|cytoplasm|Golgi apparatus|centrosome|focal adhesion|	1	1	1	1	0	0	1	1	1	1	known	polyA	N/A	AATF-Che1	TRAUB	N/A	N/A	N/A	N/A	N/A	N/A
Q13601	Krr1	KRR1 small subunit processome component homolog	protein binding|poly(A) RNA binding|	nucleus|nucleolus|cytoplasm|membrane|small-subunit processome|intercellular bridge|	1	1	1	1	0	1	1	0	1	1	known	polyA	N/A	KH_8	N/A	N/A	N/A	N/A	N/A	N/A	N/A
P25490	Yy1	Transcriptional repressor protein YY1	four-way junction DNA binding|RNA polymerase II core promoter proximal region sequence-specific DNA binding transcription factor activity involved in negative regulation of transcription|enhancer sequence-specific DNA binding|DNA binding|sequence-specific DNA binding transcription factor activity|transcription coactivator activity|transcription corepressor activity|RNA binding|protein binding|zin…	nucleus|transcription factor complex|cytoplasm|nuclear matrix|Ino80 complex|PcG protein complex|	0	0	0	0	0	1	0	0	0	0	Known	Non-polyA	ssRNA (Wai D.C.C., et al. Nucleic. Acids. Res. 2016.)	zf-C2H2*3	N/A	N/A	N/A	N/A	N/A	N/A	N/A
Q9C0B1	Fto	Alpha-ketoglutarate-dependent dioxygenase FTO	ferrous iron binding|oxidative RNA demethylase activity|oxidative DNA demethylase activity|DNA-N1-methyladenine dioxygenase activity|	nucleus|nuclear speck|	0	0	0	0	0	0	0	0	0	0	Orphan	Non-polyA	mRNA (Zhou J., et al. Nature. 2015.)	FTO_NTD	FTO_CTD	N/A	N/A	N/A	N/A	N/A	N/A
Q8WY36	Bbx	HMG box transcription factor BBX	DNA binding|	nucleoplasm|cytoplasm|	0	0	0	0	0	0	0	0	0	0	Orphan	Non-polyA	N/A	HMG_box	DUF2028	N/A	N/A	N/A	N/A	N/A	N/A
Q12972	Ppp1r8	Nuclear inhibitor of protein phosphatase 1	DNA binding|RNA binding|endonuclease activity|protein serine/threonine phosphatase inhibitor activity|protein binding|protein phosphatase type 1 regulator activity|ribonuclease E activity|	nucleus|nucleoplasm|spliceosomal complex|cytoplasm|nuclear speck|	0	0	0	0	0	1	0	0	0	0	Known	Non-polyA	pre-mRNA (Beullens M., et al. J. Biol. Chem. 2012.)	FHA	N/A	N/A	N/A	N/A	N/A	N/A	N/A
O95453	Parn	Poly(A)-specific ribonuclease PARN	nucleotide binding|mRNA 3'-UTR binding|nuclease activity|poly(A)-specific ribonuclease activity|protein binding|protein kinase binding|poly(A) RNA binding|metal ion binding|	nucleus|nucleolus|cytoplasm|cytosol|	0	0	1	0	0	1	0	0	1	0	known	polyA	N/A	CAF1	R3H	RNA bind	N/A	N/A	N/A	N/A	N/A
O75663	Tiprl	TIP41-like protein	protein binding|	cytoplasm|intracellular membrane-bounded organelle|	0	0	0	0	0	0	0	0	0	0	Orphan	Non-polyA	N/A	TIP41	N/A	N/A	N/A	N/A	N/A	N/A	N/A
Q6P1J9	Cdc73	Parafibromin	RNA polymerase II core binding|protein binding|	nucleus|nucleoplasm|Cdc73/Paf1 complex|	1	0	0	0	0	0	0	0	0	0	Known	Non-polyA	N/A	CDC73_N	CDC73_C	N/A	N/A	N/A	N/A	N/A	N/A
Q9Y314	Nosip	Nitric oxide synthase-interacting protein	protein binding|poly(A) RNA binding|	Golgi membrane|nucleus|nucleoplasm|cytoplasm|cytosol|	1	0	0	0	0	0	0	0	1	0	known	polyA	N/A	zf-NOSIP	N/A	N/A	N/A	N/A	N/A	N/A	N/A
Q9BQ67	Grwd1	Glutamate-rich WD repeat-containing protein 1	poly(A) RNA binding|	nucleus|nucleolus|cytoplasm|	0	1	1	1	0	0	0	1	1	0	known	polyA	N/A	WD40*3	CAF1C_H4-bd	N/A	N/A	N/A	N/A	N/A	N/A
Q86UE8	Tlk2	Serine/threonine-protein kinase tousled-like 2	protein serine/threonine kinase activity|protein binding|ATP binding|	nucleus|intermediate filament|perinuclear region of cytoplasm|	0	0	0	0	0	0	0	0	0	0	Orphan	Non-polyA	N/A	Pkinase	N/A	N/A	N/A	N/A	N/A	N/A	N/A
Q14527	Hltf	Helicase-like transcription factor	RNA polymerase II core promoter proximal region sequence-specific DNA binding|RNA polymerase II core promoter proximal region sequence-specific DNA binding transcription factor activity involved in positive regulation of transcription|DNA binding|helicase activity|protein binding|ATP binding|zinc ion binding|ligase activity|ATPase activity|poly(A) RNA binding|ubiquitin protein ligase activity|	nucleus|nucleoplasm|nucleolus|cytoplasm|membrane|	0	0	0	0	0	0	0	0	1	0	known	polyA	N/A	HIRAN	zf-C3HC4_3	SNF2_N	Helicase C	N/A	N/A	N/A	N/A
Q15361	Ttf1	Transcription termination factor 1	DNA binding|chromatin binding|	nucleus|nucleoplasm|nucleolus|cytoplasm|plasma membrane|	0	0	1	0	0	0	0	0	0	0	Known	Non-polyA	N/A	Myb_DNA-bind_6	N/A	N/A	N/A	N/A	N/A	N/A	N/A
O75607	Npm3	Nucleoplasmin-3	protein binding|poly(A) RNA binding|	nucleolus|	1	1	1	1	0	0	0	0	1	1	known	polyA	N/A	Nucleoplasmin	N/A	N/A	N/A	N/A	N/A	N/A	N/A
P46063	Recql	ATP-dependent DNA helicase Q1	DNA binding|DNA helicase activity|ATP-dependent DNA helicase activity|protein binding|ATP binding|annealing helicase activity|ATP-dependent 3'-5' DNA helicase activity|	nucleus|nucleoplasm|membrane|	0	0	0	0	0	0	0	0	0	0	Orphan	Non-polyA	N/A	DEAD	Helicase C	RecQ_Zn_bind	N/A	N/A	N/A	N/A	N/A
Q9NY12	Gar1	H/ACA ribonucleoprotein complex subunit 1	cation channel activity|poly(A) RNA binding|	nucleus|nucleolus|Cajal body|box H/ACA snoRNP complex|	0	1	1	1	0	1	1	0	1	1	known	polyA	N/A	Gar1	N/A	N/A	N/A	N/A	N/A	N/A	N/A
P06748	Npm1	Nucleophosmin	transcription coactivator activity|RNA binding|protein kinase inhibitor activity|protein binding|protein kinase binding|Tat protein binding|histone binding|protein homodimerization activity|ribosomal large subunit binding|ribosomal small subunit binding|poly(A) RNA binding|protein heterodimerization activity|NF-kappaB binding|unfolded protein binding|	nucleus|nucleoplasm|nucleolus|cytoplasm|centrosome|cytosol|focal adhesion|membrane|ribonucleoprotein complex|spindle pole centrosome|	1	1	1	1	1	1	0	1	1	1	known	polyA	N/A	Nucleoplasmin	N/A	N/A	N/A	N/A	N/A	N/A	N/A
P25205	Mcm3	DNA replication licensing factor MCM3	DNA binding|DNA helicase activity|protein binding|ATP binding|	nucleus|nucleoplasm|alpha DNA polymerase:primase complex|centrosome|membrane|MCM complex|intracellular membrane-bounded organelle|perinuclear region of cytoplasm|	1	0	1	0	1	0	0	0	0	0	Known	Non-polyA	N/A	MCM_N	MCM_OB	MCM	N/A	N/A	N/A	N/A	N/A
Q9NX58	Lyar	Cell growth-regulating nucleolar protein	protein binding|poly(A) RNA binding|metal ion binding|	nucleus|nucleolus|	1	0	1	1	0	0	0	0	1	1	known	polyA	N/A	zf-ACC	zf-LYAR	N/A	N/A	N/A	N/A	N/A	N/A
P35269	Gtf2f1	General transcription factor IIF subunit 1	DNA binding|transcription coactivator activity|catalytic activity|protein binding|transcription factor binding|phosphatase activator activity|poly(A) RNA binding|	nucleus|nucleoplasm|transcription factor TFIIF complex|cell junction|	1	0	1	1	0	0	0	0	1	0	known	polyA	N/A	TFIIF_alpha	N/A	N/A	N/A	N/A	N/A	N/A	N/A
Q9UPP1	Phf8	Histone lysine demethylase PHF8	chromatin binding|iron ion binding|protein binding|zinc ion binding|oxidoreductase activity, acting on paired donors, with incorporation or reduction of molecular oxygen, 2-oxoglutarate as one donor, and incorporation of one atom each of oxygen into both donors|histone demethylase activity|histone demethylase activity (H3-K9 specific)|methylated histone binding|histone demethylase activity (H4-K2…	nucleus|nucleoplasm|nucleolus|nuclear membrane|	1	0	0	0	0	0	0	0	0	0	Known	Non-polyA	N/A	PHD	Jmjc	JHD	N/A	N/A	N/A	N/A	N/A
O60942	Rngtt	mRNA-capping enzyme	mRNA guanylyltransferase activity|polynucleotide 5'-phosphatase activity|protein tyrosine phosphatase activity|GTP binding|protein tyrosine/serine/threonine phosphatase activity|RNA guanylyltransferase activity|triphosphatase activity|	nucleus|nucleoplasm|	1	0	0	0	0	0	0	0	0	0	Known	Non-polyA	mRNA (Ghosh A., et al. Mol. Cell. 2011.)	DSPc	mRNA_cap_enzyme	mRNA_cap_C	N/A	N/A	N/A	N/A	N/A
P31689	Dnaja1	DnaJ homolog subfamily A member 1	G-protein coupled receptor binding|protein binding|ATP binding|Hsp70 protein binding|ubiquitin protein ligase binding|metal ion binding|low-density lipoprotein particle receptor binding|unfolded protein binding|chaperone binding|C3HC4-type RING finger domain binding|	nucleus|mitochondrion|cytosol|membrane|perinuclear region of cytoplasm|extracellular exosome|cytoplasmic side of endoplasmic reticulum membrane|ubiquitin ligase complex|	1	1	0	0	0	0	0	1	0	0	known	polyA	N/A	DnaJ	DnaJ_C	DnaJ_CXXCXGXG	N/A	N/A	N/A	N/A	N/A
Q2TBE0	Cwf19l2	CWF19-like protein 2	catalytic activity|	N/A	0	0	1	0	0	0	0	0	0	0	Known	Non-polyA	mRNA (Zhang X., et al. Cell Res. 2019.)	CwfJ_C_1	CwfJ_C_2	N/A	N/A	N/A	N/A	N/A	N/A
Q01780	Exosc10	Exosome component 10	nucleotide binding|exoribonuclease activity|protein binding|3'-5' exonuclease activity|poly(A) RNA binding|	nuclear exosome (RNase complex)|exosome (RNase complex)|nucleus|nucleoplasm|nucleolus|cytoplasm|membrane|transcriptionally active chromatin|	1	1	1	1	0	1	1	0	1	0	known	polyA	N/A	PMC2NT	DNA_pol_A_exo1	HRDC	N/A	N/A	N/A	N/A	N/A
Q9BWU0	Slc4a1ap	Kanadaptin	protein binding|	nucleus|nucleoplasm|cytoplasm|plasma membrane|intracellular membrane-bounded organelle|	1	0	0	0	0	1	0	0	0	0	Known	Non-polyA	mRNA (Xu Q., et al. Plos one. 2014.)	FHA	N/A	N/A	N/A	N/A	N/A	N/A	N/A
Q15555	Mapre2	Microtubule-associated protein RP/EB family member 2	protein binding|microtubule binding|	cytoplasm|microtubule cytoskeleton|microtubule plus-end|	0	0	0	0	0	0	0	0	0	0	Orphan	Non-polyA	N/A	CH	Eb1	N/A	N/A	N/A	N/A	N/A	N/A
O15347	Hmgb3	High mobility group protein B3	four-way junction DNA binding|chromatin binding|double-stranded DNA binding|protein binding|DNA binding, bending|poly(A) RNA binding|	nucleus|chromosome|	1	0	0	1	0	1	0	0	0	0	known	polyA	N/A	HMG_box_2	HMG_box	N/A	N/A	N/A	N/A	N/A	N/A
O15381	Nvl	Nuclear valosin-containing protein-like	ATP binding|poly(A) RNA binding|	nucleus|nucleolus|cytoplasm|mitochondrion|plasma membrane|membrane|	1	0	1	0	0	0	0	0	1	0	known	polyA	N/A	Nucleolin_bd	AAA*2	AAA_lid_3*2	N/A	N/A	N/A	N/A	N/A
Q16543	Cdc37	Hsp90 co-chaperone Cdc37	protein binding|protein C-terminus binding|protein kinase regulator activity|kinase binding|heat shock protein binding|mitogen-activated protein kinase kinase kinase binding|protein kinase B binding|unfolded protein binding|chaperone binding|Hsp90 protein binding|	cytoplasm|cytosol|ruffle membrane|extracellular exosome|HSP90-CDC37 chaperone complex|	1	0	0	0	0	0	0	0	0	0	Known	Non-polyA	N/A	CDC37_N	CDC37_M	CDC37_C	N/A	N/A	N/A	N/A	N/A
Q6PCB5	Rsbn1l	Round spermatid basic protein 1-like protein	N/A	nucleus|	0	0	0	0	0	0	0	0	0	0	Orphan	Non-polyA	N/A	N/A	N/A	N/A	N/A	N/A	N/A	N/A	N/A
P78347	Gtf2i	General transcription factor II-I	DNA binding|sequence-specific DNA binding transcription factor activity|protein binding|mitogen-activated protein kinase binding|	nucleus|nucleoplasm|cytoplasm|membrane|cell projection|neuronal cell body|	1	0	1	0	0	0	0	0	0	1	known	polyA	N/A	GTF2I*6	N/A	N/A	N/A	N/A	N/A	N/A	N/A
Q9Y5B9	Supt16h	FACT complex subunit SPT16	protein binding|poly(A) RNA binding|	nucleus|nucleoplasm|chromosome|	1	0	1	1	0	0	0	0	1	0	known	polyA	N/A	FACT-Spt16_Nlob	Peptidase_M24	SPT16	Rtt106	N/A	N/A	N/A	N/A
P36873	Ppp1cc	Serine/threonine-protein phosphatase PP1-gamma catalytic subunit	phosphoprotein phosphatase activity|protein serine/threonine phosphatase activity|protein binding|phosphatase activity|protein kinase binding|poly(A) RNA binding|metal ion binding|protein N-terminus binding|	condensed chromosome kinetochore|nucleus|nucleolus|cytoplasm|mitochondrion|cytosol|focal adhesion|nuclear speck|midbody|cleavage furrow|dendritic spine|protein complex|MLL5-L complex|PTW/PP1 phosphatase complex|	1	0	0	1	0	0	0	0	0	0	known	polyA	N/A	Metallophos	STPPase_N	N/A	N/A	N/A	N/A	N/A	N/A
Q92499	Ddx1	ATP-dependent RNA helicase DDX1	DNA binding|chromatin binding|transcription cofactor activity|RNA helicase activity|double-stranded RNA binding|ATP-dependent RNA helicase activity|nuclease activity|exonuclease activity|protein binding|ATP binding|ATP-dependent helicase activity|poly(A) binding|DNA/RNA helicase activity|poly(A) RNA binding|	nucleus|nucleoplasm|cytoplasm|cytoplasmic stress granule|membrane|ribonucleoprotein complex|cleavage body|tRNA-splicing ligase complex|	1	1	1	1	1	1	0	0	1	1	known	polyA	N/A	DEAD	Helicase_C	SPRY	N/A	N/A	N/A	N/A	N/A
Q9Y3C1	Nop16	Nucleolar protein 16	poly(A) RNA binding|	nucleus|nucleolus|intracellular membrane-bounded organelle|	1	1	1	1	0	0	1	0	1	1	known	polyA	N/A	Nop16*2	N/A	N/A	N/A	N/A	N/A	N/A	N/A
P62277	Rps13	40S ribosomal protein S13	mRNA binding|structural constituent of ribosome|protein binding|poly(A) RNA binding|small ribosomal subunit rRNA binding|	nucleus|nucleolus|cytosol|ribosome|focal adhesion|membrane|cytosolic small ribosomal subunit|extracellular exosome|	1	1	1	1	1	1	0	1	0	1	known	polyA	N/A	Ribosomal_S13_N	Ribosomal_S15	N/A	N/A	N/A	N/A	N/A	N/A
O95376	Arih2	E3 ubiquitin-protein ligase ARIH2	nucleic acid binding|ubiquitin-protein transferase activity|protein binding|zinc ion binding|ligase activity|	nucleus|cytoplasm|	0	0	0	0	0	0	0	0	0	0	Orphan	Non-polyA	N/A	IBR*2	N/A	N/A	N/A	N/A	N/A	N/A	N/A
P19338	Ncl	Nucleolin	nucleotide binding|single-stranded DNA binding|RNA binding|calcium ion binding|protein binding|protein C-terminus binding|selenocysteine insertion sequence binding|rRNA primary transcript binding|telomeric DNA binding|histone binding|identical protein binding|laminin binding|poly(A) RNA binding|ErbB-4 class receptor binding|	fibrillar center|dense fibrillar component|nucleus|nucleoplasm|nucleolus|cell cortex|cell surface|membrane|ribonucleoprotein complex|cytoplasmic ribonucleoprotein granule|extracellular exosome|	1	1	1	1	1	1	1	1	1	1	known	polyA	N/A	RRM_1*4	N/A	N/A	N/A	N/A	N/A	N/A	N/A
Q9ULW0	Tpx2	Targeting protein for Xklp2	protein binding|ATP binding|GTP binding|protein kinase binding|	nucleus|nucleoplasm|cytoplasm|spindle|microtubule|microtubule cytoskeleton|axon hillock|spindle pole|	1	0	0	0	0	0	0	0	0	0	Known	Non-polyA	N/A	Aurora-A_bind	TPX2_importin	TPX2	N/A	N/A	N/A	N/A	N/A
P06493	Cdk1	Cyclin-dependent kinase 1	protein kinase activity|protein serine/threonine kinase activity|cyclin-dependent protein serine/threonine kinase activity|protein binding|ATP binding|RNA polymerase II carboxy-terminal domain kinase activity|Hsp70 protein binding|	nucleus|nucleoplasm|cytoplasm|mitochondrion|centrosome|cytosol|spindle microtubule|membrane|midbody|extracellular exosome|mitotic spindle|	0	0	0	0	0	0	0	0	0	0	Orphan	Non-polyA	N/A	Pkinase	N/A	N/A	N/A	N/A	N/A	N/A	N/A
Q00535	Cdk5	Cyclin-dependent-like kinase 5	p53 binding|protein kinase activity|protein serine/threonine kinase activity|cyclin-dependent protein serine/threonine kinase activity|ErbB-2 class receptor binding|protein binding|ATP binding|cytoskeletal protein binding|kinase activity|protein kinase binding|acetylcholine receptor activator activity|ErbB-3 class receptor binding|ephrin receptor binding|tau-protein kinase activity|	nucleus|cytoplasm|cytosol|cytoskeleton|postsynaptic density|membrane|cyclin-dependent protein kinase 5 holoenzyme complex|lamellipodium|cell junction|filopodium|axon|dendrite|growth cone|neuromuscular junction|neuronal cell body|perikaryon|postsynaptic membrane|	1	0	0	0	0	0	0	0	0	0	Known	Non-polyA	N/A	Pkinase	N/A	N/A	N/A	N/A	N/A	N/A	N/A
Q9Y2P8	Rcl1	RNA 3'-terminal phosphate cyclase-like protein	RNA binding|endoribonuclease activity|RNA-3'-phosphate cyclase activity|	nucleolus|	0	0	1	0	0	0	0	0	0	1	known	polyA	N/A	RTC	RTC_insert	N/A	N/A	N/A	N/A	N/A	N/A
Q9Y2R4	Ddx52	Probable ATP-dependent RNA helicase DDX52	helicase activity|ATP binding|poly(A) RNA binding|	nucleus|nucleolus|membrane|	1	1	1	1	1	1	1	0	1	1	known	polyA	N/A	DEAD	Helicase_C	N/A	N/A	N/A	N/A	N/A	N/A
Q13642-1	Fhl1	Isoform 1 of Four and a half LIM domains protein 1	protein binding|zinc ion binding|ion channel binding|	nucleus|cytoplasm|cytosol|plasma membrane|focal adhesion|	0	0	0	0	0	0	0	0	0	0	Orphan	Non-polyA	N/A	LIM*3	N/A	N/A	N/A	N/A	N/A	N/A	N/A
O96028	Whsc1	Histone-lysine N-methyltransferase NSD2	chromatin binding|protein binding|zinc ion binding|histone-lysine N-methyltransferase activity|sequence-specific DNA binding|	nucleus|nucleoplasm|chromosome|cytoplasm|	0	0	0	0	0	0	0	0	0	0	Orphan	Non-polyA	N/A	PWWP*2	HMG_box	AWS	SET	C5HCH	N/A	N/A	N/A
Q9HB71	Cacybp	Calcyclin-binding protein	protein binding|protein homodimerization activity|	nuclear envelope lumen|nucleoplasm|cytoplasm|beta-catenin destruction complex|neuron projection|cell body|extracellular exosome|	1	0	1	0	1	0	0	0	0	0	Known	Non-polyA	N/A	Siah-Interact_N	CS	SGS	N/A	N/A	N/A	N/A	N/A
Q96JP5	Zfp91	E3 ubiquitin-protein ligase ZFP91	nucleic acid binding|ubiquitin-protein transferase activity|ligase activity|metal ion binding|	nucleus|	1	0	0	0	0	0	0	0	0	0	Known	Non-polyA	N/A	zf-C2H2*3	N/A	N/A	N/A	N/A	N/A	N/A	N/A
G8JLH9	Stat3	Signal transducer and activator of transcription	DNA binding|sequence-specific DNA binding transcription factor activity|signal transducer activity|	nucleoplasm|cytoplasm|	0	0	0	0	0	0	0	0	0	0	Orphan	Non-polyA	N/A	STAT_alpha	STAT_bind	SH2	N/A	N/A	N/A	N/A	N/A
P27694	Rpa1	Replication protein A 70 kDa DNA-binding subunit	chromatin binding|damaged DNA binding|single-stranded DNA binding|protein binding|metal ion binding|	lateral element|male germ cell nucleus|nucleus|nucleoplasm|DNA replication factor A complex|PML body|PML body|	1	1	1	0	0	0	0	0	0	0	known	polyA	N/A	Rep-A_N	tRNA_anti-codon	REPA_OB_2	Rep_fac-A_C	N/A	N/A	N/A	N/A
Q3B726	Twistnb	DNA-directed RNA polymerase I subunit RPA43	RNA polymerase I activity|	nucleus|nucleoplasm|nucleolus|DNA-directed RNA polymerase I complex|microtubule cytoskeleton|	0	1	1	0	0	0	0	0	0	0	known	polyA	N/A	SHS2_Rpb7-N	RPA43_OB	N/A	N/A	N/A	N/A	N/A	N/A
P49321	Nasp	Nuclear autoantigenic sperm protein	protein binding|protein complex binding|histone binding|Hsp90 protein binding|	nuclear chromatin|nucleus|nucleoplasm|cytoplasm|protein complex|	1	0	1	0	1	0	0	0	0	0	Known	Non-polyA	N/A	SHNi-TPR	N/A	N/A	N/A	N/A	N/A	N/A	N/A
Q96GD4	Aurkb	Aurora kinase B	protein serine/threonine kinase activity|protein serine/threonine/tyrosine kinase activity|protein binding|ATP binding|histone serine kinase activity|metal ion binding|	condensed chromosome, centromeric region|condensed nuclear chromosome, centromeric region|nucleus|spindle|cytosol|spindle microtubule|chromocenter|midbody|spindle pole centrosome|chromosome passenger complex|spindle midzone|kinetochore|	0	0	0	0	0	0	0	0	0	0	Orphan	Non-polyA	N/A	Pkinase	N/A	N/A	N/A	N/A	N/A	N/A	N/A
Q5QJE6	Dnttip2	Deoxynucleotidyltransferase terminal-interacting protein 2	poly(A) RNA binding|	nucleus|nucleolus|	1	1	1	1	0	0	1	0	1	1	known	polyA	N/A	Fcf2	N/A	N/A	N/A	N/A	N/A	N/A	N/A
Q8N5C6	Srbd1	S1 RNA-binding domain-containing protein 1	RNA binding|	N/A	0	1	0	0	0	1	0	1	0	1	known	polyA	N/A	TEX N	Tex_YqgF	HHH 9	HHH 3	S1	N/A	N/A	N/A
Q9NVU7	Sdad1	Protein SDA1 homolog	N/A	nucleus|nucleolus|	1	1	1	0	0	0	0	0	0	1	known	polyA	N/A	NUC130_3NT	SDA1*2	N/A	N/A	N/A	N/A	N/A	N/A
P78316	Nop14	Nucleolar protein 14	enzyme binding|snoRNA binding|poly(A) RNA binding|	nucleus|nucleolus|mitochondrion|membrane|90S preribosome|Noc4p-Nop14p complex|small-subunit processome|	1	1	1	1	0	0	1	0	1	1	known	polyA	N/A	Nop14	N/A	N/A	N/A	N/A	N/A	N/A	N/A
O00566	Mphosph10	U3 small nucleolar ribonucleoprotein protein MPP10	protein binding|poly(A) RNA binding|	chromosome|nucleolus|small nucleolar ribonucleoprotein complex|small-subunit processome|Mpp10 complex|	1	1	1	1	0	0	1	0	1	1	known	polyA	N/A	Mpp10	N/A	N/A	N/A	N/A	N/A	N/A	N/A
Q9NVN8	Gnl3l	Guanine nucleotide-binding protein-like 3-like protein	GTPase activity|protein binding|GTP binding|poly(A) RNA binding|	nucleus|nucleoplasm|nucleolus|cytoplasm|mitochondrion|membrane|	1	1	1	0	0	0	0	0	1	0	known	polyA	N/A	MMR_HSR1	N/A	N/A	N/A	N/A	N/A	N/A	N/A
P12956	Xrcc6	X-ray repair cross-complementing protein 6	DNA binding|damaged DNA binding|double-stranded DNA binding|ATP-dependent DNA helicase activity|protein binding|ATP binding|protein C-terminus binding|transcription regulatory region DNA binding|poly(A) RNA binding|5'-deoxyribose-5-phosphate lyase activity|double-stranded telomeric DNA binding|	nuclear telomere cap complex|nucleus|nucleoplasm|transcription factor complex|cytosol|membrane|Ku70:Ku80 complex|nonhomologous end joining complex|	1	1	1	1	1	0	1	1	1	1	known	polyA	N/A	Ku_N	Ku	Ku_C	SAP	N/A	N/A	N/A	N/A
A0A0B4J1V9	Hells	Helicase, lymphoid-specific, isoform CRA_b	chromatin binding|helicase activity|ATP binding|	nucleus|pericentric heterochromatin|	0	0	0	0	0	0	0	0	0	0	Orphan	Non-polyA	N/A	SNF2_N	Helicase C	N/A	N/A	N/A	N/A	N/A	N/A
Q9BSC4	Nol10	Nucleolar protein 10	poly(A) RNA binding|	nucleolus|	1	1	1	1	0	0	1	0	1	0	known	polyA	N/A	NUC153	N/A	N/A	N/A	N/A	N/A	N/A	N/A
P09874	Parp1	Poly [ADP-ribose] polymerase 1	DNA binding|chromatin binding|NAD+ ADP-ribosyltransferase activity|protein binding|transcription factor binding|zinc ion binding|enzyme binding|protein kinase binding|identical protein binding|poly(A) RNA binding|protein N-terminus binding|NAD binding|R-SMAD binding|	nucleus|nuclear envelope|nucleoplasm|transcription factor complex|nucleolus|mitochondrion|membrane|protein complex|	1	0	1	1	1	0	0	0	1	1	known	polyA	N/A	zf-PARP*2	PADR1	BRCT	WGR	PARP_reg	PARP	N/A	N/A
P42285	Skiv2l2	Superkiller viralicidic activity 2-like 2	RNA helicase activity|protein binding|ATP binding|poly(A) RNA binding|	nucleus|nucleoplasm|nucleolus|catalytic step 2 spliceosome|exosome (RNase complex)|	1	1	1	0	0	0	1	0	1	1	known	polyA	N/A	DEAD	Helicase C	rRNA_proc-arch	DSHCT	N/A	N/A	N/A	N/A
Q9Y3I0	Rtcb	tRNA-splicing ligase RtcB homolog	RNA ligase (ATP) activity|protein binding|ATP binding|vinculin binding|poly(A) RNA binding|metal ion binding|	nucleus|nuclear envelope|cytoplasm|endoplasmic reticulum membrane|tRNA-splicing ligase complex|	1	1	1	0	1	0	1	1	0	0	known	polyA	N/A	RtcB	N/A	N/A	N/A	N/A	N/A	N/A	N/A
Q9NYH9	Utp6	U3 small nucleolar RNA-associated protein 6 homolog	snoRNA binding|	nucleolus|small-subunit processome|Pwp2p-containing subcomplex of 90S preribosome|	1	1	1	0	0	1	0	0	0	0	known	polyA	N/A	U3_assoc_6	N/A	N/A	N/A	N/A	N/A	N/A	N/A
P35251	Rfc1	Replication factor C subunit 1	DNA binding|DNA clamp loader activity|protein binding|ATP binding|enzyme activator activity|	nucleus|nucleoplasm|DNA replication factor C complex|Golgi apparatus|cell junction|extracellular exosome|	0	0	1	0	0	0	0	0	0	0	Known	Non-polyA	N/A	BRCT	AAA	RFC1	N/A	N/A	N/A	N/A	N/A
Q9GZS1-2	Polr1e	Isoform 2 of DNA-directed RNA polymerase I subunit RPA49	RNA polymerase I transcription factor binding|DNA binding|RNA polymerase I activity|	nucleus|nucleoplasm|nucleolus|DNA-directed RNA polymerase I complex|	0	0	0	0	0	0	0	0	0	0	Orphan	Non-polyA	N/A	RNA_pol_I_A49	N/A	N/A	N/A	N/A	N/A	N/A	N/A
Q9NVP1	Ddx18	ATP-dependent RNA helicase DDX18	ATP-dependent RNA helicase activity|protein binding|ATP binding|poly(A) RNA binding|	nucleolus|membrane|	1	1	1	1	1	1	1	0	1	1	known	polyA	N/A	DEAD	Helicase_C	DUF4217	N/A	N/A	N/A	N/A	N/A
P78346	Rpp30	Ribonuclease P protein subunit p30	ribonuclease P activity|protein binding|poly(A) RNA binding|	nucleus|nucleolar ribonuclease P complex|	1	0	1	0	0	1	0	0	1	0	known	polyA	N/A	RNase_P_p30	N/A	N/A	N/A	N/A	N/A	N/A	N/A
Q9BVJ6	Utp14a	U3 small nucleolar RNA-associated protein 14 homolog A	protein binding|poly(A) RNA binding|	nucleolus|small-subunit processome|	1	1	1	1	0	0	1	0	1	1	known	polyA	N/A	Utp14	N/A	N/A	N/A	N/A	N/A	N/A	N/A
O43395	Prpf3	U4/U6 small nuclear ribonucleoprotein Prp3	protein binding|identical protein binding|poly(A) RNA binding|	nucleus|nucleoplasm|spliceosomal complex|cytoplasm|Cajal body|nuclear speck|U4/U6 x U5 tri-snRNP complex|	1	1	1	1	0	0	0	0	0	0	known	polyA	N/A	PWI	PRP3	DUF1115	N/A	N/A	N/A	N/A	N/A
Q9UBD5	Orc3	Origin recognition complex subunit 3	DNA replication origin binding|protein binding|	origin recognition complex|nucleoplasm|nuclear origin of replication recognition complex|	0	0	0	0	0	0	0	0	0	0	Orphan	Non-polyA	N/A	ORC3_N	ORC_WH_C	N/A	N/A	N/A	N/A	N/A	N/A
Q14684	Rrp1b	Ribosomal RNA processing protein 1 homolog B	poly(A) RNA binding|	euchromatin|heterochromatin|nucleus|nucleolus|cytosol|preribosome, small subunit precursor|	1	1	1	1	1	0	1	0	1	1	known	polyA	N/A	Nop52	N/A	N/A	N/A	N/A	N/A	N/A	N/A
Q08J23	Nsun2	tRNA (cytosine(34)-C(5))-methyltransferase	tRNA binding|tRNA (cytosine-5-)-methyltransferase activity|poly(A) RNA binding|	nucleus|nucleolus|cytoplasm|spindle|chromatoid body|	1	1	1	1	1	1	0	1	1	0	known	polyA	N/A	Methyltr_RsmB-F	N/A	N/A	N/A	N/A	N/A	N/A	N/A
Q9Y2X3	Nop58	Nucleolar protein 58	protein binding|snoRNA binding|poly(A) RNA binding|	nucleus|nucleolus|small nucleolar ribonucleoprotein complex|cytoplasm|Cajal body|membrane|box C/D snoRNP complex|small-subunit processome|pre-snoRNP complex|	1	1	1	1	1	1	1	1	1	1	known	polyA	N/A	NOP5NT	Nop	N/A	N/A	N/A	N/A	N/A	N/A
O60832	Dkc1	H/ACA ribonucleoprotein complex subunit 4	telomerase activity|RNA binding|protein binding|pseudouridine synthase activity|poly(A) RNA binding|	nucleus|nucleoplasm|telomerase holoenzyme complex|nucleolus|cytoplasm|Cajal body|box H/ACA snoRNP complex|	1	1	1	0	1	1	0	0	1	1	known	polyA	N/A	DKCLD	TruB_N	TruB_C_2	PUA	N/A	N/A	N/A	N/A
Q9NVI1	Fanci	Fanconi anemia group I protein	DNA binding|protein binding|DNA polymerase binding|	nucleus|nucleoplasm|cytoplasm|plasma membrane|membrane|	1	0	1	0	0	0	0	0	0	0	Known	Non-polyA	ssRNA (Liang Z., et al. Cell Rep. 2019.)	FANCI_S1-cap	FANCI_S1-4	FANCI_HD1-2	N/A	N/A	N/A	N/A	N/A
P38432	Coil	Coilin	protein binding|protein C-terminus binding|identical protein binding|	nucleus|nucleoplasm|nucleolus|cytoplasm|Cajal body|membrane|	1	0	1	0	0	1	0	0	0	0	Known	Non-polyA	snoRNA (Machyna M., et al. Mol. Cell. 2014.)	Coilin_N	N/A	N/A	N/A	N/A	N/A	N/A	N/A
Q02880	Top2b	DNA topoisomerase 2-beta	chromatin binding|DNA topoisomerase type II (ATP-hydrolyzing) activity|protein kinase C binding|ATP binding|protein C-terminus binding|DNA binding, bending|enzyme binding|histone deacetylase binding|metal ion binding|protein heterodimerization activity|	nucleus|nucleoplasm|cytoplasm|cytosol|DNA topoisomerase complex (ATP-hydrolyzing)|nucleolus|nucleoid|heterochromatin|	1	0	1	0	0	0	0	0	0	0	Known	Non-polyA	N/A	HATPase_c	DNA_gyraseB	Toprim	TOPRIM_C	DNA_topoisoIV	DTHCT	N/A	N/A
O75131	Cpne3	Copine-3	protein serine/threonine kinase activity|transporter activity|calcium-dependent phospholipid binding|poly(A) RNA binding|	nucleus|cytoplasm|cytosol|plasma membrane|extracellular exosome|	1	0	0	0	0	0	0	0	1	0	known	polyA	N/A	C2*2	Copine	N/A	N/A	N/A	N/A	N/A	N/A
O95239	Kif4a	Chromosome-associated kinesin KIF4A	DNA binding|microtubule motor activity|protein binding|ATP binding|microtubule binding|ATPase activity|	nucleoplasm|chromosome|cytoplasm|cytosol|kinesin complex|spindle microtubule|membrane|nuclear matrix|midbody|	1	0	0	0	0	0	0	0	0	0	Known	Non-polyA	N/A	Kinesin	N/A	N/A	N/A	N/A	N/A	N/A	N/A
P46013	Mki67	Proliferation marker protein Ki-67	protein binding|ATP binding|protein C-terminus binding|poly(A) RNA binding|	chromosome, centromeric region|condensed chromosome|nucleus|nucleolus|cytoplasm|membrane|	1	1	1	0	0	0	1	0	1	0	known	polyA	N/A	FHA	PP1 bind	KI67R*8	N/A	N/A	N/A	N/A	N/A
P49916	Lig3	DNA ligase 3	DNA binding|DNA ligase activity|DNA ligase (ATP) activity|protein binding|ATP binding|zinc ion binding|	synaptonemal complex|nucleus|nucleoplasm|cytoplasm|mitochondrion|DNA ligase III-XRCC1 complex|	1	0	0	0	0	0	0	0	0	0	Known	Non-polyA	N/A	zf-PARP	DNA_ligase_A_M	DNA_ligase_A_N	DNA_ligase_A_C	LIG3_BRCT	N/A	N/A	N/A
Q9Y6V7	Ddx49	Probable ATP-dependent RNA helicase DDX49	ATP-dependent RNA helicase activity|ATP binding|poly(A) RNA binding|	N/A	0	1	1	0	0	1	0	0	1	1	known	polyA	N/A	DEAD	Helicase C	N/A	N/A	N/A	N/A	N/A	N/A
Q9NR30	Ddx21	Nucleolar RNA helicase 2	double-stranded RNA binding|ATP-dependent RNA helicase activity|protein binding|ATP binding|rRNA binding|snoRNA binding|poly(A) RNA binding|7SK snRNA binding|	nucleus|nucleoplasm|nucleolus|membrane|	1	1	1	1	1	1	1	1	1	1	known	polyA	N/A	DEAD	Helicase_C	GUCT	N/A	N/A	N/A	N/A	N/A
Q9BQ75	Cmss1	Protein CMSS1	poly(A) RNA binding|	N/A	0	1	0	0	0	0	0	0	0	1	known	polyA	N/A	CMS1	N/A	N/A	N/A	N/A	N/A	N/A	N/A
P27695	Apex1	DNA-(apurinic or apyrimidinic site) lyase	DNA binding|damaged DNA binding|transcription coactivator activity|transcription corepressor activity|DNA-(apurinic or apyrimidinic site) lyase activity|endonuclease activity|endodeoxyribonuclease activity|RNA-DNA hybrid ribonuclease activity|phosphodiesterase I activity|uracil DNA N-glycosylase activity|protein binding|phosphoric diester hydrolase activity|double-stranded DNA 3'-5' exodeoxyribon…	nucleus|nucleoplasm|nucleolus|cytoplasm|mitochondrion|endoplasmic reticulum|centrosome|ribosome|nuclear speck|perinuclear region of cytoplasm|	1	0	1	1	1	1	0	0	0	0	known	polyA	N/A	Exo_endo_phos	N/A	N/A	N/A	N/A	N/A	N/A	N/A
B5MCF9	Pes1	Pescadillo homolog	ribonucleoprotein complex binding|	nucleus|nucleoplasm|chromosome|nucleolus|cytoplasm|preribosome, large subunit precursor|	0	0	0	1	0	0	0	0	1	1	known	polyA	N/A	Pescadillo_N	BRCT 2	N/A	N/A	N/A	N/A	N/A	N/A
Q9P287	Bccip	BRCA2 and CDKN1A-interacting protein	protein binding|kinase regulator activity|poly(A) RNA binding|	nucleus|nuclear cyclin-dependent protein kinase holoenzyme complex|	1	0	1	0	0	0	0	0	1	0	known	polyA	N/A	BCIP	N/A	N/A	N/A	N/A	N/A	N/A	N/A
Q9NYP9	Mis18a	Protein Mis18-alpha	protein binding|	chromosome, centromeric region|nucleus|nucleoplasm|cytoplasm|	0	0	0	0	0	0	0	0	0	0	Orphan	Non-polyA	N/A	Yippee-Mis18	N/A	N/A	N/A	N/A	N/A	N/A	N/A
Q96KM6	Znf512b	Zinc finger protein 512B	DNA binding|protein binding|metal ion binding|	nucleus|	0	0	0	0	0	0	0	0	0	0	Orphan	Non-polyA	N/A	N/A	N/A	N/A	N/A	N/A	N/A	N/A	N/A
Q5VTR2	Rnf20	E3 ubiquitin-protein ligase BRE1A	p53 binding|chromatin binding|transcription coactivator activity|mRNA 3'-UTR binding|ubiquitin-protein transferase activity|protein binding|zinc ion binding|ligase activity|ubiquitin protein ligase binding|histone binding|ubiquitin-protein transferase activity|	ubiquitin ligase complex|nucleus|nucleoplasm|nucleolus|HULC complex|	1	0	0	0	0	1	0	0	0	0	Known	Non-polyA	mRNA (Pirngruber J., et al. EMBO Rep. 2009.)	zf-C3HC4_3	N/A	N/A	N/A	N/A	N/A	N/A	N/A
Q9Y3F4	Strap	Serine-threonine kinase receptor-associated protein	receptor binding|protein binding|poly(A) RNA binding|	nucleus|nucleoplasm|cytoplasm|cytosol|plasma membrane|SMN complex|SMN-Sm protein complex|	1	1	1	1	1	0	0	0	1	1	known	polyA	N/A	WD40*4	N/A	N/A	N/A	N/A	N/A	N/A	N/A
Q9Y3B9	Rrp15	RRP15-like protein	N/A	nucleus|nucleolus|mitochondrion|	1	1	1	0	0	0	0	0	0	0	known	polyA	N/A	Rrp15p	N/A	N/A	N/A	N/A	N/A	N/A	N/A
Q9H0S4	Ddx47	Probable ATP-dependent RNA helicase DDX47	ATP-dependent RNA helicase activity|protein binding|ATP binding|poly(A) RNA binding|	nucleolus|membrane|	1	1	1	1	1	1	0	0	1	1	known	polyA	N/A	DEAD	Helicase_C	N/A	N/A	N/A	N/A	N/A	N/A
Q99661	Kif2c	Kinesin-like protein KIF2C	microtubule motor activity|protein binding|ATP binding|ATPase activity|centromeric DNA binding|microtubule plus-end binding|	chromosome, centromeric region|condensed chromosome kinetochore|nucleus|cytosol|kinesin complex|microtubule cytoskeleton|membrane|microtubule plus-end|kinetochore|cytoplasmic microtubule|	1	0	1	0	0	0	0	0	0	0	Known	Non-polyA	N/A	Kinesin	N/A	N/A	N/A	N/A	N/A	N/A	N/A
Q9NY93	Ddx56	Probable ATP-dependent RNA helicase DDX56	ATP-dependent RNA helicase activity|ATP binding|poly(A) RNA binding|	nucleolus|membrane|	1	1	1	0	1	1	1	1	1	1	known	polyA	N/A	DEAD	Helicase_C	N/A	N/A	N/A	N/A	N/A	N/A
Q9NW13	Rbm28	RNA-binding protein 28	nucleotide binding|poly(A) RNA binding|	spliceosomal complex|nucleolus|	1	1	1	1	1	1	1	1	1	1	known	polyA	N/A	RRM_1*3	N/A	N/A	N/A	N/A	N/A	N/A	N/A
M0R210	Rps16	40S ribosomal protein S16	structural constituent of ribosome|	ribosome|	0	0	0	1	0	1	0	0	0	1	known	polyA	N/A	Ribosomal_S9	N/A	N/A	N/A	N/A	N/A	N/A	N/A
Q8NHQ9	Ddx55	ATP-dependent RNA helicase DDX55	ATP-dependent RNA helicase activity|protein binding|ATP binding|poly(A) RNA binding|	membrane|	0	1	1	0	0	1	0	0	1	0	known	polyA	N/A	DEAD	Helicase C	DUF4217	N/A	N/A	N/A	N/A	N/A
Q8IUF8	Mina	Ribosomal oxygenase 2	RNA polymerase II transcription factor binding transcription repressor activity|metal ion binding|dioxygenase activity|	nucleus|transcription factor complex|nucleolus|cytoplasm|cytosol|	0	0	1	0	0	0	0	0	0	0	Known	Non-polyA	N/A	Cupin_4	N/A	N/A	N/A	N/A	N/A	N/A	N/A
P61313	Rpl15	60S ribosomal protein L15	RNA binding|structural constituent of ribosome|protein binding|poly(A) RNA binding|	nucleus|cytosol|ribosome|cytosolic large ribosomal subunit|extracellular exosome|	1	1	1	1	1	1	0	1	1	1	known	polyA	N/A	Ribosomal_L15e	N/A	N/A	N/A	N/A	N/A	N/A	N/A
Q9BVI4	Noc4l	Nucleolar complex protein 4 homolog	protein binding|poly(A) RNA binding|	nucleus|nucleolus|integral component of membrane|Noc4p-Nop14p complex|nuclear membrane|small-subunit processome|	0	0	1	0	0	0	0	0	1	0	known	polyA	N/A	CBF	N/A	N/A	N/A	N/A	N/A	N/A	N/A
Q9Y3T9	Noc2l	Nucleolar complex protein 2 homolog	chromatin binding|transcription corepressor activity|protein binding|nucleosome binding|histone binding|poly(A) RNA binding|repressing transcription factor binding|	nucleus|nucleoplasm|nucleolus|	1	1	1	1	1	0	0	0	1	0	known	polyA	N/A	Noc2	N/A	N/A	N/A	N/A	N/A	N/A	N/A
Q9BWE0	Repin1	Replication initiator 1	DNA binding|poly(A) RNA binding|metal ion binding|	nucleus|nucleoplasm|nuclear origin of replication recognition complex|lipid particle|cytosolic ribosome|nuclear membrane|	0	0	0	0	0	0	0	0	1	0	known	polyA	N/A	zf-C2H2*10	N/A	N/A	N/A	N/A	N/A	N/A	N/A
O14929	Hat1	Histone acetyltransferase type B catalytic subunit	histone acetyltransferase activity|protein binding|H4 histone acetyltransferase activity|histone binding|	nuclear chromatin|nucleus|nucleoplasm|cytoplasm|nuclear matrix|intracellular membrane-bounded organelle|protein complex|	1	0	0	0	0	0	0	0	0	0	Known	Non-polyA	N/A	Hat1_N	N/A	N/A	N/A	N/A	N/A	N/A	N/A
Q4G0J3	Larp7	La-related protein 7	nucleotide binding|protein binding|poly(A) RNA binding|	nucleus|nucleoplasm|cytoplasm|Golgi apparatus|ribonucleoprotein complex|	1	1	1	1	0	1	0	0	1	0	known	polyA	N/A	La	RRM 1	RRM_3	N/A	N/A	N/A	N/A	N/A
P48729	Csnk1a1	Casein kinase I isoform alpha	protein kinase activity|protein serine/threonine kinase activity|protein binding|ATP binding|	condensed chromosome kinetochore|cytoplasm|centrosome|cytosol|membrane|nuclear speck|primary cilium|mRNA cleavage and polyadenylation specificity factor complex|	1	0	1	0	0	0	0	0	0	0	Known	Non-polyA	N/A	Pkinase	N/A	N/A	N/A	N/A	N/A	N/A	N/A
Q96ME7	Znf512	Zinc finger protein 512	DNA binding|metal ion binding|	nucleus|nucleoplasm|	0	0	0	0	0	0	0	0	0	0	Orphan	Non-polyA	N/A	zf-C2H2	N/A	N/A	N/A	N/A	N/A	N/A	N/A
P22087	Fbl	rRNA 2'-O-methyltransferase fibrillarin	RNA binding|protein binding|rRNA methyltransferase activity|poly(A) RNA binding|histone-glutamine methyltransferase activity|	dense fibrillar component|granular component|nucleus|nucleolus|Cajal body|membrane|box C/D snoRNP complex|small-subunit processome|extracellular exosome|	1	1	1	1	1	1	1	0	1	1	known	polyA	N/A	Fibrillarin	N/A	N/A	N/A	N/A	N/A	N/A	N/A
O75152	Zc3h11a	Zinc finger CCCH domain-containing protein 11A	protein binding|poly(A) RNA binding|metal ion binding|	intracellular|transcription export complex|	1	1	1	1	1	1	1	1	1	1	known	polyA	N/A	zf-CCCH 3	N/A	N/A	N/A	N/A	N/A	N/A	N/A
P45973	Cbx5	Chromobox protein homolog 5	chromatin binding|protein binding|protein binding, bridging|methylated histone binding|protein homodimerization activity|histone deacetylase binding|repressing transcription factor binding|	histone deacetylase complex|kinetochore|nucleus|nuclear envelope|nucleoplasm|nuclear heterochromatin|nucleolus|chromocenter|transcriptional repressor complex|nuclear pericentric heterochromatin|histone methyltransferase complex|PML body|	1	0	0	0	0	0	0	0	0	0	Known	Non-polyA	N/A	Chromo	Chromo_shadow	N/A	N/A	N/A	N/A	N/A	N/A
P47813	Eif1ax	Eukaryotic translation initiation factor 1A, X-chromosomal	translation initiation factor activity|protein binding|translation factor activity, RNA binding|poly(A) RNA binding|	cytosol|	1	0	1	1	0	1	0	0	1	1	known	polyA	N/A	eIF-1a	N/A	N/A	N/A	N/A	N/A	N/A	N/A
P61962	Dcaf7	DDB1- and CUL4-associated factor 7	protein binding|	nucleoplasm|cytoplasm|nuclear matrix|protein complex|Cul4-RING E3 ubiquitin ligase complex|	0	0	0	0	0	0	0	0	0	0	Orphan	Non-polyA	N/A	WD40	N/A	N/A	N/A	N/A	N/A	N/A	N/A
Q9Y6X9	Morc2	MORC family CW-type zinc finger protein 2	zinc ion binding|	nucleus|nucleoplasm|cytoplasm|cytosol|	0	0	0	0	0	0	0	0	0	0	Orphan	Non-polyA	pre-mRNA (Zhang F., et al. Cancer Res. 2018.)	HATPase_c_3	Morc6_S5	zf-CW	N/A	N/A	N/A	N/A	N/A
P62269	Rps18	40S ribosomal protein S18	structural constituent of ribosome|protein binding|rRNA binding|poly(A) RNA binding|	nucleus|cytoplasm|cytosol|ribosome|focal adhesion|small ribosomal subunit|membrane|cytosolic small ribosomal subunit|extracellular exosome|	1	1	1	1	0	1	1	0	0	1	known	polyA	N/A	Ribosomal_S13	N/A	N/A	N/A	N/A	N/A	N/A	N/A
P13010	Xrcc5	X-ray repair cross-complementing protein 5	DNA binding|damaged DNA binding|double-stranded DNA binding|ATP-dependent DNA helicase activity|protein binding|ATP binding|protein C-terminus binding|ubiquitin protein ligase binding|telomeric DNA binding|transcription regulatory region DNA binding|poly(A) RNA binding|double-stranded telomeric DNA binding|5'-deoxyribose-5-phosphate lyase activity|	nuclear telomere cap complex|nuclear chromosome, telomeric region|nucleus|nucleoplasm|nucleolus|cytosol|plasma membrane|membrane|Ku70:Ku80 complex|nonhomologous end joining complex|	1	1	1	1	1	1	0	1	1	1	known	polyA	N/A	Ku_N	Ku	Ku_C	Ku_PK_bind	N/A	N/A	N/A	N/A
P33992	Mcm5	DNA replication licensing factor MCM5	DNA helicase activity|chromatin binding|DNA replication origin binding|protein binding|ATP binding|	nucleus|nucleoplasm|membrane|MCM complex|	1	0	1	0	1	0	0	0	0	0	Known	Non-polyA	N/A	MCM_N	MCM_OB	MCM	N/A	N/A	N/A	N/A	N/A
Q9NRN7	Aasdhppt	L-aminoadipate-semialdehyde dehydrogenase-phosphopantetheinyl transferase	magnesium ion binding|protein binding|holo-[acyl-carrier-protein] synthase activity|	cytosol|extracellular exosome|	1	0	0	0	0	0	0	0	0	0	Known	Non-polyA	N/A	ACPS	N/A	N/A	N/A	N/A	N/A	N/A	N/A
O00567	Nop56	Nucleolar protein 56	RNA binding|protein binding|snoRNA binding|poly(A) RNA binding|	nucleoplasm|nucleolus|small nucleolar ribonucleoprotein complex|cytoplasm|membrane|box C/D snoRNP complex|small-subunit processome|pre-snoRNP complex|	1	1	1	1	1	1	1	1	1	1	known	polyA	N/A	NOP5NT	Nop	N/A	N/A	N/A	N/A	N/A	N/A
Q9BQG0	Mybbp1a	Myb-binding protein 1A	core promoter binding|transcription corepressor activity|DNA-directed DNA polymerase activity|protein binding|transcription factor binding|sequence-specific DNA binding|poly(A) RNA binding|	nucleus|nucleolus|cytoplasm|membrane|NLS-dependent protein nuclear import complex|intracellular membrane-bounded organelle|	1	1	1	1	1	0	1	1	1	1	known	polyA	N/A	DNA_pol_phi	N/A	N/A	N/A	N/A	N/A	N/A	N/A
Q8TAT6	Nploc4	Nuclear protein localization protein 4 homolog	protein binding|zinc ion binding|ubiquitin protein ligase binding|ubiquitin binding|	nucleus|nucleoplasm|endoplasmic reticulum|cytosol|VCP-NPL4-UFD1 AAA ATPase complex|UFD1-NPL4 complex|nuclear outer membrane-endoplasmic reticulum membrane network|	1	0	0	0	0	0	0	0	0	0	Known	Non-polyA	N/A	NPL4	UN_NPL4	zf-NPL4	N/A	N/A	N/A	N/A	N/A
Q09028	Rbbp4	Histone-binding protein RBBP4	protein binding|histone binding|histone deacetylase binding|RNA polymerase II core promoter proximal region sequence-specific DNA binding|RNA polymerase II distal enhancer sequence-specific DNA binding|DNA-dependent ATPase activity|nucleosomal DNA binding|	nuclear chromatin|nucleus|nucleoplasm|Sin3 complex|NuRD complex|NURF complex|CAF-1 complex|ESC/E(Z) complex|protein complex|	1	0	0	0	0	0	0	0	0	0	Known	Non-polyA	N/A	CAF1C_H4-bd	WD40*5	N/A	N/A	N/A	N/A	N/A	N/A
O76021	Rsl1d1	Ribosomal L1 domain-containing protein 1	poly(A) RNA binding|	nucleolus|membrane|	1	1	1	1	1	1	1	1	1	1	known	polyA	N/A	Ribosomal_L1	N/A	N/A	N/A	N/A	N/A	N/A	N/A
Q06265	Exosc9	Exosome complex component RRP45	3'-5'-exoribonuclease activity|RNA binding|protein binding|AU-rich element binding|poly(A) RNA binding|exoribonuclease activity|	nuclear exosome (RNase complex)|exosome (RNase complex)|nuclear chromosome|nucleus|nucleoplasm|nucleolus|cytoplasm|cytosol|intermediate filament cytoskeleton|extracellular exosome|nucleolus|	0	0	0	0	0	1	0	0	1	1	known	polyA	N/A	RNase_PH	RNase_PH_C	N/A	N/A	N/A	N/A	N/A	N/A
Q14683	Smc1a	Structural maintenance of chromosomes protein 1A	chromatin binding|microtubule motor activity|protein binding|ATP binding|mediator complex binding|poly(A) RNA binding|protein heterodimerization activity|	chromosome, centromeric region|kinetochore|condensed chromosome kinetochore|condensed nuclear chromosome|nucleus|nucleoplasm|chromosome|nucleolus|cytoplasm|cytosol|cohesin core heterodimer|meiotic cohesin complex|	1	0	1	1	0	0	0	0	0	0	known	polyA	N/A	SMC_N	SMC_hinge	N/A	N/A	N/A	N/A	N/A	N/A
P42677	Rps27	40S ribosomal protein S27	DNA binding|structural constituent of ribosome|protein binding|zinc ion binding|poly(A) RNA binding|	nucleus|cytosol|ribosome|cytosolic small ribosomal subunit|	0	1	1	1	0	1	0	1	0	0	known	polyA	N/A	Ribosomal_S27e	N/A	N/A	N/A	N/A	N/A	N/A	N/A
F5H5D3	Tuba1c	Tubulin alpha chain	GTPase activity|structural constituent of cytoskeleton|GTP binding|	cytoplasm|microtubule|	0	0	0	0	0	0	0	0	0	0	Orphan	Non-polyA	N/A	Tubulin	Tubulin C	N/A	N/A	N/A	N/A	N/A	N/A
Q7L1Q6	Bzw1	Basic leucine zipper and W2 domain-containing protein 1	poly(A) RNA binding|	cytoplasm|membrane|	0	1	1	1	1	0	0	0	1	0	known	polyA	N/A	W2	N/A	N/A	N/A	N/A	N/A	N/A	N/A
Q13838	Ddx39b	Spliceosome RNA helicase DDX39B	ATP-dependent RNA helicase activity|protein binding|ATP binding|RNA-dependent ATPase activity|U6 snRNA binding|U4 snRNA binding|ATP-dependent protein binding|poly(A) RNA binding|	transcription export complex|nucleus|nucleoplasm|spliceosomal complex|nuclear speck|U4 snRNP|U6 snRNP|cytoplasm|	1	0	1	0	1	1	1	0	0	1	known	polyA	N/A	DEAD	Helicase_C	N/A	N/A	N/A	N/A	N/A	N/A
O00139-2	Kif2a	Isoform 2 of Kinesin-like protein KIF2A	motor activity|microtubule motor activity|protein binding|ATP binding|microtubule binding|ATPase activity|	centrosome|cytosol|kinesin complex|membrane|sperm principal piece|spindle pole|spindle microtubule|	0	0	0	0	0	0	0	0	0	0	Orphan	Non-polyA	N/A	Kinesin	N/A	N/A	N/A	N/A	N/A	N/A	N/A
P07437	Tubb	Tubulin beta chain	GTPase activity|structural molecule activity|structural constituent of cytoskeleton|protein binding|GTP binding|protein domain specific binding|ubiquitin protein ligase binding|protein complex binding|GTPase activating protein binding|MHC class I protein binding|	nucleus|nuclear envelope lumen|cytosol|cytoskeleton|microtubule|cytoplasmic ribonucleoprotein granule|cell body|extracellular exosome|	1	1	1	0	1	0	0	0	0	0	known	polyA	N/A	Tubulin	Tubulin_C	N/A	N/A	N/A	N/A	N/A	N/A
P19525	Eif2ak2	Interferon-induced, double-stranded RNA-activated protein kinase	double-stranded RNA binding|protein kinase activity|protein serine/threonine kinase activity|eukaryotic translation initiation factor 2alpha kinase activity|non-membrane spanning protein tyrosine kinase activity|protein binding|ATP binding|protein phosphatase type 2A regulator activity|poly(A) RNA binding|	nucleus|cytoplasm|cytosol|ribosome|membrane|perinuclear region of cytoplasm|	1	0	1	1	0	1	0	0	0	1	known	polyA	N/A	dsrm*2	Pkinase	N/A	N/A	N/A	N/A	N/A	N/A
P55060	Cse1l	Exportin-2	protein binding|importin-alpha export receptor activity|Ran GTPase binding|	nucleus|nucleoplasm|cytoplasm|membrane|extracellular exosome|	1	0	1	0	0	0	0	1	0	0	known	polyA	N/A	IBN_N	CSE	CAS_CSE1	N/A	N/A	N/A	N/A	N/A
P62263	Rps14	40S ribosomal protein S14	RNA binding|structural constituent of ribosome|protein binding|poly(A) RNA binding|translation regulator activity|mRNA 5'-UTR binding|small ribosomal subunit rRNA binding|	nucleolus|cytoplasm|mitochondrion|cytosol|focal adhesion|membrane|cytosolic small ribosomal subunit|extracellular exosome|	1	1	1	1	1	1	1	1	0	1	known	polyA	N/A	Ribosomal_S11	N/A	N/A	N/A	N/A	N/A	N/A	N/A
Q96QE3	Atad5	ATPase family AAA domain-containing protein 5	ATP binding|	nucleus|	0	0	0	0	0	0	0	0	0	0	Orphan	Non-polyA	N/A	AAA	N/A	N/A	N/A	N/A	N/A	N/A	N/A
Q9Y3A5	Sbds	Ribosome maturation protein SBDS	protein binding|microtubule binding|rRNA binding|ribosome binding|poly(A) RNA binding|	spindle pole|nucleus|nucleoplasm|nucleolus|cytoplasm|	0	0	1	0	0	1	0	0	1	0	known	polyA	N/A	SBDS	SBDS C	N/A	N/A	N/A	N/A	N/A	N/A
P62701	Rps4x	40S ribosomal protein S4, X isoform	structural constituent of ribosome|rRNA binding|poly(A) RNA binding|	cytosol|ribosome|polysome|focal adhesion|small ribosomal subunit|membrane|cytosolic small ribosomal subunit|ribonucleoprotein complex|cytoplasmic ribonucleoprotein granule|extracellular exosome|	1	1	1	1	1	1	0	0	1	1	known	polyA	N/A	RS4NT	S4	Ribosomal_S4e	KOW	40S_S4_C	N/A	N/A	N/A
Q15397	Kiaa0020	Pumilio homolog 3	DNA binding|mRNA binding|poly(A) RNA binding|	nucleolus|endoplasmic reticulum|	1	1	1	1	0	0	1	0	1	1	known	polyA	N/A	CPL	N/A	N/A	N/A	N/A	N/A	N/A	N/A
P05198	Eif2s1	Eukaryotic translation initiation factor 2 subunit 1	translation initiation factor activity|protein binding|ribosome binding|poly(A) RNA binding|	nucleus|cytosol|ribosome|polysome|eukaryotic translation initiation factor 2 complex|cytoplasmic stress granule|membrane|eukaryotic 48S preinitiation complex|multi-eIF complex|extracellular exosome|eukaryotic translation initiation factor 2B complex|	1	1	1	1	0	1	0	0	1	1	known	polyA	N/A	S1	EIF_2_alpha	N/A	N/A	N/A	N/A	N/A	N/A
O00178	Gtpbp1	GTP-binding protein 1	GTPase activity|GTP binding|poly(A) RNA binding|	cytoplasmic exosome (RNase complex)|cytosol|membrane|	1	0	1	0	0	1	0	0	1	0	known	polyA	N/A	GTP_EFTU	N/A	N/A	N/A	N/A	N/A	N/A	N/A
P39748	Fen1	Flap endonuclease 1	magnesium ion binding|DNA binding|damaged DNA binding|double-stranded DNA binding|endonuclease activity|RNA-DNA hybrid ribonuclease activity|exonuclease activity|protein binding|double-stranded DNA exodeoxyribonuclease activity|5'-3' exonuclease activity|5'-flap endonuclease activity|manganese ion binding|	nucleus|nucleoplasm|nucleolus|mitochondrion|plasma membrane|membrane|protein complex|	0	1	1	0	0	0	0	0	0	0	known	polyA	N/A	XPG_N	XPG_I	N/A	N/A	N/A	N/A	N/A	N/A
Q9HAU5	Upf2	Regulator of nonsense transcripts 2	RNA binding|protein binding|	nucleus|cytoplasm|cytosol|exon-exon junction complex|perinuclear region of cytoplasm|	0	0	1	0	0	1	0	0	0	1	known	polyA	N/A	MIF4G*3	Upf2	N/A	N/A	N/A	N/A	N/A	N/A
O95347	Smc2	Structural maintenance of chromosomes protein 2	protein binding|ATP binding|protein heterodimerization activity|	nuclear chromosome|condensed chromosome|condensin complex|nucleus|nucleoplasm|cytoplasm|cytosol|extracellular exosome|	1	0	1	0	0	0	0	0	0	0	Known	Non-polyA	N/A	SMC_N*2	SMC_hinge	N/A	N/A	N/A	N/A	N/A	N/A
Q9Y5T5	Usp16	Ubiquitin carboxyl-terminal hydrolase 16	transcription coactivator activity|cysteine-type endopeptidase activity|ubiquitin-specific protease activity|zinc ion binding|histone binding|ubiquitin binding|	nucleus|cytoplasm|	0	0	0	0	0	0	0	0	0	0	Orphan	Non-polyA	N/A	zf-UBP	UCH	N/A	N/A	N/A	N/A	N/A	N/A
Q86UK7	Znf598	E3 ubiquitin-protein ligase ZNF598	zinc ion binding|poly(A) RNA binding|	N/A	1	0	1	1	0	0	0	0	1	0	known	polyA	N/A	N/A	N/A	N/A	N/A	N/A	N/A	N/A	N/A
P68104	Eef1a1	Elongation factor 1-alpha 1	tRNA binding|translation elongation factor activity|GTPase activity|protein binding|GTP binding|protein kinase binding|poly(A) RNA binding|	extracellular space|nucleus|nucleolus|cytoplasm|cytosol|eukaryotic translation elongation factor 1 complex|membrane|cortical actin cytoskeleton|ruffle membrane|myelin sheath|extracellular exosome|nucleus|	0	0	1	1	1	1	0	0	1	0	known	polyA	N/A	GTP_EFTU	GTP_EFTU_D2	GTP_EFTU_D3	N/A	N/A	N/A	N/A	N/A
Q49A26	Glyr1	Putative oxidoreductase GLYR1	DNA binding|phosphogluconate dehydrogenase (decarboxylating) activity|protein binding|methylated histone binding|NAD binding|	nucleoplasm|cytoplasm|Golgi apparatus|	0	0	0	0	0	0	0	0	0	0	Orphan	Non-polyA	N/A	PWWP	NAD_binding_2	NAD_binding_11	N/A	N/A	N/A	N/A	N/A
P46777	Rpl5	60S ribosomal protein L5	RNA binding|structural constituent of ribosome|protein binding|5S rRNA binding|poly(A) RNA binding|	nucleus|nucleolus|cytoplasm|cytosol|focal adhesion|membrane|cytosolic large ribosomal subunit|ribonucleoprotein complex|extracellular exosome|	1	1	1	1	1	1	1	1	1	1	known	polyA	N/A	Ribosomal_L18p	Ribosomal_L18_c	N/A	N/A	N/A	N/A	N/A	N/A
E9PD53	Smc4	Structural maintenance of chromosomes protein	ATP binding|	nucleoplasm|chromosome|cytoplasm|	0	0	0	0	0	0	0	0	0	0	Orphan	Non-polyA	N/A	SMC_C	SMC_hinge	N/A	N/A	N/A	N/A	N/A	N/A
Q15021	Ncapd2	Condensin complex subunit 1	chromatin binding|protein binding|histone binding|	condensed chromosome, centromeric region|condensed chromosome|condensin complex|condensin core heterodimer|nuclear condensin complex|nucleus|nucleoplasm|cytoplasm|cytosol|membrane|nuclear chromosome|cytoplasm|	1	0	1	0	1	0	0	0	0	0	Known	Non-polyA	N/A	Cnd1_N	Cnd1	N/A	N/A	N/A	N/A	N/A	N/A
P46781	Rps9	40S ribosomal protein S9	structural constituent of ribosome|protein binding|rRNA binding|poly(A) RNA binding|translation regulator activity|	nucleus|nucleolus|cytoplasm|cytosol|ribosome|focal adhesion|membrane|cytosolic small ribosomal subunit|ribonucleoprotein complex|extracellular exosome|	1	1	1	0	1	1	0	1	1	1	known	polyA	N/A	Ribosomal_S4	S4	N/A	N/A	N/A	N/A	N/A	N/A
P26373	Rpl13	60S ribosomal protein L13	RNA binding|structural constituent of ribosome|protein binding|poly(A) RNA binding|	nucleus|nucleolus|cytoplasm|cytosol|membrane|cytosolic large ribosomal subunit|cytosolic ribosome|	1	1	1	0	1	1	1	1	1	1	known	polyA	N/A	Ribosomal_L13e	N/A	N/A	N/A	N/A	N/A	N/A	N/A
B4DXZ6	Fxr1	Fragile X mental retardation syndrome-related protein 1	mRNA binding|	nucleus|cytoplasm|	0	0	0	1	0	1	1	0	1	1	known	polyA	N/A	Tudor_FRX1	Agenet	KH_9	KH 1*2	FXMRP1_C_core*2	FXR_C1	FXR_C3	N/A
Q9BXJ9	Naa15	N-alpha-acetyltransferase 15, NatA auxiliary subunit	protein binding|N-acetyltransferase activity|ribosome binding|poly(A) RNA binding|acetyltransferase activity|ribosome binding|	nucleus|transcription factor complex|cytoplasm|membrane|NatA complex|	1	1	1	0	0	0	0	0	1	0	known	polyA	N/A	TPR_8	NARP1	N/A	N/A	N/A	N/A	N/A	N/A
Q15046	Kars	Lysine--tRNA ligase	tRNA binding|lysine-tRNA ligase activity|protein binding|ATP binding|amino acid binding|metal ion binding|	extracellular region|nucleus|cytoplasm|mitochondrion|mitochondrial matrix|cytosol|plasma membrane|microtubule cytoskeleton|aminoacyl-tRNA synthetase multienzyme complex|	1	0	1	0	1	1	0	0	0	0	Known	Non-polyA	tRNA (Guzzo C.M., et al. Biochem. Biophys. Res. Commun. 2008.)	tRNA_anti-codon	tRNA-synt_2	N/A	N/A	N/A	N/A	N/A	N/A
O75475	Psip1	PC4 and SFRS1-interacting protein	RNA polymerase II transcription coactivator activity|chromatin binding|protein binding|activating transcription factor binding|poly(A) RNA binding|supercoiled DNA binding|	nucleus|nucleoplasm|nuclear heterochromatin|cytosol|nuclear periphery|transcriptionally active chromatin|nucleolus|	1	0	1	1	0	0	0	0	1	0	known	polyA	N/A	PWWP	LEDGF	N/A	N/A	N/A	N/A	N/A	N/A
Q9UG63	Abcf2	ATP-binding cassette sub-family F member 2	transporter activity|ATP binding|ATPase activity|	mitochondrial envelope|membrane|ATP-binding cassette (ABC) transporter complex|	1	1	1	0	0	0	0	0	0	0	known	polyA	N/A	ABC_tran*2	ABC_tran_Xtn	N/A	N/A	N/A	N/A	N/A	N/A
P62906	Rpl10a	60S ribosomal protein L10a	structural constituent of ribosome|protein binding|poly(A) RNA binding|	nucleus|nucleolus|cytoplasm|mitochondrion|cytosol|focal adhesion|membrane|cytosolic large ribosomal subunit|extracellular exosome|	1	1	1	1	1	1	0	1	1	1	known	polyA	N/A	Ribosomal_L1	N/A	N/A	N/A	N/A	N/A	N/A	N/A
P62829	Rpl23	60S ribosomal protein L23	structural constituent of ribosome|protein binding|poly(A) RNA binding|large ribosomal subunit rRNA binding|	nucleolus|cytoplasm|cytosol|ribosome|focal adhesion|membrane|cytosolic large ribosomal subunit|extracellular exosome|	1	1	1	0	1	1	0	1	1	0	known	polyA	N/A	Ribosomal_L14	N/A	N/A	N/A	N/A	N/A	N/A	N/A
P18754	Rcc1	Regulator of chromosome condensation	chromatin binding|Ran guanyl-nucleotide exchange factor activity|protein binding|nucleosomal DNA binding|histone binding|	nuclear chromatin|condensed nuclear chromosome|nucleus|nucleoplasm|cytoplasm|nuclear membrane|	1	0	1	0	0	0	0	0	0	0	Known	Non-polyA	N/A	RCC1*7	N/A	N/A	N/A	N/A	N/A	N/A	N/A
P15170-2	Gspt1	Isoform 2 of Eukaryotic peptide chain release factor GTP-binding subunit ERF3A	translation release factor activity|GTPase activity|protein binding|GTP binding|poly(A) RNA binding|	intracellular|	0	0	0	1	0	1	0	1	1	0	known	polyA	N/A	GTP_EFTU	GTP_EFTU_D2	GTP_EFTU_D3	N/A	N/A	N/A	N/A	N/A
P46778	Rpl21	60S ribosomal protein L21	RNA binding|structural constituent of ribosome|poly(A) RNA binding|	nucleolus|cytoplasm|cytosol|membrane|cytosolic large ribosomal subunit|	1	1	1	1	1	0	0	1	1	0	known	polyA	N/A	Ribosomal_L21e	N/A	N/A	N/A	N/A	N/A	N/A	N/A
P54577	Yars	Tyrosine--tRNA ligase, cytoplasmic	tRNA binding|tyrosine-tRNA ligase activity|signal transducer activity|interleukin-8 receptor binding|ATP binding|poly(A) RNA binding|isoleucine-tRNA ligase activity|	extracellular space|nucleus|cytoplasm|cytosol|	1	0	1	0	0	1	0	1	1	0	known	polyA	N/A	tRNA-synt_1b	tRNA bind	N/A	N/A	N/A	N/A	N/A	N/A
P63173	Rpl38	60S ribosomal protein L38	RNA binding|structural constituent of ribosome|	cytosol|focal adhesion|cytosolic large ribosomal subunit|eukaryotic 80S initiation complex|	0	0	1	0	1	0	0	1	0	0	known	polyA	N/A	Ribosomal_L38e	N/A	N/A	N/A	N/A	N/A	N/A	N/A
Q9NUQ3	Txlng	Gamma-taxilin	syntaxin binding|protein heterodimerization activity|	cytosol|nuclear membrane|	1	0	1	0	0	0	0	0	0	0	Known	Non-polyA	N/A	Taxilin	N/A	N/A	N/A	N/A	N/A	N/A	N/A
Q9UIG0	Baz1b	Tyrosine-protein kinase BAZ1B	chromatin binding|protein tyrosine kinase activity|non-membrane spanning protein tyrosine kinase activity|protein binding|ATP binding|zinc ion binding|histone kinase activity|lysine-acetylated histone binding|vitamin D receptor activator activity|	condensed chromosome|pericentric heterochromatin|nuclear replication fork|	1	1	0	0	0	0	0	1	0	0	known	polyA	N/A	WAC_Acf1_DNA_bd	WHIM1	WSD	PHD	Bromodomain	N/A	N/A	N/A
Q9BY44	Eif2a	Eukaryotic translation initiation factor 2A	tRNA binding|translation initiation factor activity|protein binding|ribosome binding|	extracellular space|cytoplasm|eukaryotic translation initiation factor 2 complex|blood microparticle|	1	1	1	0	1	1	0	0	0	0	known	polyA	N/A	eIF2A	N/A	N/A	N/A	N/A	N/A	N/A	N/A
Q9Y295	Drg1	Developmentally-regulated GTP-binding protein 1	protein binding|GTP binding|transcription factor binding|identical protein binding|	cytoplasm|polysome|membrane|	1	1	1	0	0	0	0	0	0	1	known	polyA	N/A	MMR_HSR1	MMR_HSR1_Xtn	TGS	N/A	N/A	N/A	N/A	N/A
Q13185	Cbx3	Chromobox protein homolog 3	protein binding|enzyme binding|protein domain specific binding|identical protein binding|histone methyltransferase binding|	chromosome, centromeric region|condensed chromosome, centromeric region|chromatin|nucleus|nuclear envelope|nuclear inner membrane|nucleoplasm|nuclear euchromatin|nuclear heterochromatin|spindle|chromocenter|nuclear pericentric heterochromatin|	1	0	1	0	1	0	0	0	0	0	Known	Non-polyA	N/A	Chromo	Chromo_shadow	N/A	N/A	N/A	N/A	N/A	N/A
Q14694	Usp10	Ubiquitin carboxyl-terminal hydrolase 10	p53 binding|cysteine-type endopeptidase activity|ubiquitin-specific protease activity|protein binding|ion channel binding|poly(A) RNA binding|	nucleus|nucleoplasm|cytoplasm|early endosome|	1	1	1	1	0	0	1	0	1	1	known	polyA	N/A	PAM2	UCH	N/A	N/A	N/A	N/A	N/A	N/A
Q6PKG0	Larp1	La-related protein 1	RNA cap binding|mRNA 3'-UTR binding|protein binding|eukaryotic initiation factor 4E binding|translation activator activity|translation initiation factor binding|poly(A) RNA binding|mRNA 5'-UTR binding|	nucleoplasm|cytoplasm|membrane|TORC1 complex|	1	1	1	1	1	1	1	1	1	1	known	polyA	N/A	La	N/A	N/A	N/A	N/A	N/A	N/A	N/A
Q15003	Ncaph	Condensin complex subunit 2	protein binding|	condensin complex|nucleus|cytoplasm|cytosol|membrane|	1	0	0	0	0	0	0	0	0	0	Known	Non-polyA	N/A	Cnd2	N/A	N/A	N/A	N/A	N/A	N/A	N/A
Q13310-2	Pabpc4	Isoform 2 of Polyadenylate-binding protein 4	nucleotide binding|protein binding|poly(A) binding|poly(U) RNA binding|poly(A) RNA binding|poly(C) RNA binding|	nucleus|cytoplasm|cytoplasmic stress granule|ribonucleoprotein complex|	0	0	0	1	1	1	1	1	1	1	known	polyA	N/A	RRM 1*4	PABP	N/A	N/A	N/A	N/A	N/A	N/A
Q14974	Kpnb1	Importin subunit beta-1	protein binding|nuclear localization sequence binding|zinc ion binding|Ran GTPase binding|protein transporter activity|enzyme binding|protein domain specific binding|poly(A) RNA binding|	nuclear envelope|nuclear pore|nucleoplasm|cytoplasm|cytosol|membrane|nuclear membrane|extracellular exosome|endoplasmic reticulum tubular network|	1	0	1	1	1	0	0	0	0	0	known	polyA	N/A	IBN_N	N/A	N/A	N/A	N/A	N/A	N/A	N/A
P30050	Rpl12	60S ribosomal protein L12	structural constituent of ribosome|protein binding|rRNA binding|poly(A) RNA binding|	cytosol|focal adhesion|membrane|cytosolic large ribosomal subunit|extracellular exosome|	1	1	1	1	1	1	0	1	0	1	known	polyA	N/A	Ribosomal_L11_N	Ribosomal_L11	N/A	N/A	N/A	N/A	N/A	N/A
Q9NVV4	Mtpap	Poly(A) RNA polymerase, mitochondrial	magnesium ion binding|UTP binding|polynucleotide adenylyltransferase activity|protein binding|ATP binding|manganese ion binding|identical protein binding|protein homodimerization activity|poly(A) RNA binding|	mitochondrion|intracellular membrane-bounded organelle|	1	1	1	1	0	1	1	0	1	1	known	polyA	N/A	RL	PAP_assoc	N/A	N/A	N/A	N/A	N/A	N/A
Q14258	Trim25	E3 ubiquitin/ISG15 ligase TRIM25	sequence-specific DNA binding transcription factor activity|protein binding|zinc ion binding|acid-amino acid ligase activity|poly(A) RNA binding|ubiquitin protein ligase activity involved in ERAD pathway|	nucleoplasm|cytoplasm|cytosol|	1	1	1	0	1	0	0	1	1	1	known	polyA	N/A	zf-RING_UBOX	PRY	SPRY	N/A	N/A	N/A	N/A	N/A
Q14008	Ckap5	Cytoskeleton-associated protein 5	protein binding|	spindle pole|centrosome|cytosol|membrane|protein complex|gamma-tubulin complex|microtubule cytoskeleton|microtubule plus-end|	1	1	1	0	0	0	0	0	0	0	known	polyA	N/A	CLASP_N	HEAT	N/A	N/A	N/A	N/A	N/A	N/A
Q8NE71	Abcf1	ATP-binding cassette sub-family F member 1	protein binding|ATP binding|translation factor activity, RNA binding|translation activator activity|ATPase activity|ribosome binding|poly(A) RNA binding|	nuclear envelope|nucleoplasm|cytoplasm|cytosol|ribosome|membrane|polysomal ribosome|	1	1	1	1	1	0	0	1	1	1	known	polyA	N/A	ABC_tran*2	ABC_tran_Xtn	N/A	N/A	N/A	N/A	N/A	N/A
P39023	Rpl3	60S ribosomal protein L3	RNA binding|structural constituent of ribosome|poly(A) RNA binding|	nucleus|nucleoplasm|nucleolus|cytoplasm|cytosol|focal adhesion|cytosolic large ribosomal subunit|extracellular exosome|	1	1	1	1	1	1	0	1	1	1	known	polyA	N/A	Ribosomal_L3	N/A	N/A	N/A	N/A	N/A	N/A	N/A
Q9NX20	Mrpl16	39S ribosomal protein L16, mitochondrial	structural constituent of ribosome|rRNA binding|	mitochondrial inner membrane|mitochondrial large ribosomal subunit|	0	0	1	0	0	1	1	0	0	0	known	polyA	N/A	Ribosomal_L16	N/A	N/A	N/A	N/A	N/A	N/A	N/A
Q9UQ80	Pa2g4	Proliferation-associated protein 2G4	DNA binding|sequence-specific DNA binding transcription factor activity|protein binding|ubiquitin protein ligase binding|poly(A) RNA binding|	nucleus|nucleoplasm|nucleolus|cytoplasm|membrane|ribonucleoprotein complex|extracellular exosome|	1	1	1	0	1	1	0	0	1	1	known	polyA	N/A	Peptidase_M24	N/A	N/A	N/A	N/A	N/A	N/A	N/A
P18621	Rpl17	60S ribosomal protein L17	structural constituent of ribosome|poly(A) RNA binding|	nucleus|cytosol|cytosolic large ribosomal subunit|	1	1	1	1	0	1	0	1	1	0	known	polyA	N/A	Ribosomal_L22	N/A	N/A	N/A	N/A	N/A	N/A	N/A
E7EQZ4	Smn1	Survival motor neuron protein	RNA binding|	spliceosomal complex|cytoplasm|	0	0	0	0	0	1	0	0	0	0	Known	Non-polyA	pre-mRNA (Lotti F., et al. Cell. 2012.)	SMN	N/A	N/A	N/A	N/A	N/A	N/A	N/A
Q04637	Eif4g1	Eukaryotic translation initiation factor 4 gamma 1	translation initiation factor activity|protein binding|translation factor activity, RNA binding|eukaryotic initiation factor 4E binding|poly(A) RNA binding|	cytoplasm|cytosol|membrane|eukaryotic translation initiation factor 4F complex|	1	1	1	1	1	1	0	1	1	0	known	polyA	N/A	MIF4G	MA3	W2	N/A	N/A	N/A	N/A	N/A
Q07065	Ckap4	Cytoskeleton-associated protein 4	poly(A) RNA binding|	endoplasmic reticulum|endoplasmic reticulum membrane|lipid particle|cytoskeleton|plasma membrane|membrane|integral component of membrane|perinuclear region of cytoplasm|extracellular exosome|	1	1	1	1	0	0	0	0	1	1	known	polyA	N/A	N/A	N/A	N/A	N/A	N/A	N/A	N/A	N/A
P61247	Rps3a	40S ribosomal protein S3a	RNA binding|structural constituent of ribosome|protein binding|poly(A) RNA binding|	nucleus|nucleolus|cytoplasm|cytosol|focal adhesion|cytosolic small ribosomal subunit|ribonucleoprotein complex|extracellular exosome|	1	1	1	1	1	0	0	1	1	1	known	polyA	N/A	Ribosomal_S3Ae	N/A	N/A	N/A	N/A	N/A	N/A	N/A
Q9NZI8	Igf2bp1	Insulin-like growth factor 2 mRNA-binding protein 1	nucleotide binding|mRNA binding|mRNA 3'-UTR binding|protein binding|poly(A) RNA binding|translation regulator activity|mRNA 5'-UTR binding|	nucleus|cytoplasm|cytosol|cytoplasmic stress granule|lamellipodium|filopodium|axon|growth cone|ribonucleoprotein complex|dendritic spine|perinuclear region of cytoplasm|CRD-mediated mRNA stability complex|	0	1	1	1	1	1	1	1	1	1	known	polyA	N/A	RRM_1	RRM_6	KH_1*4	N/A	N/A	N/A	N/A	N/A
P18124	Rpl7	60S ribosomal protein L7	DNA binding|RNA binding|mRNA binding|structural constituent of ribosome|protein binding|protein homodimerization activity|poly(A) RNA binding|	nucleus|nucleolus|cytoplasm|cytosol|polysome|focal adhesion|membrane|cytosolic large ribosomal subunit|ribonucleoprotein complex|extracellular exosome|	1	1	1	1	1	1	0	0	1	1	known	polyA	N/A	Ribosomal_L30_N	Ribosomal_L30	N/A	N/A	N/A	N/A	N/A	N/A
Q00688	Fkbp3	Peptidyl-prolyl cis-trans isomerase FKBP3	peptidyl-prolyl cis-trans isomerase activity|receptor activity|protein binding|FK506 binding|poly(A) RNA binding|	nucleus|cytoplasm|endoplasmic reticulum membrane|	1	1	1	0	0	0	0	1	1	0	known	polyA	N/A	BTHB	FKBP_C	N/A	N/A	N/A	N/A	N/A	N/A
Q99543	Dnajc2	DnaJ homolog subfamily C member 2	DNA binding|chromatin binding|Hsp70 protein binding|histone binding|ubiquitin binding|poly(A) RNA binding|	nucleus|nucleoplasm|cytoplasm|cytosol|nuclear membrane|	1	0	1	0	0	0	0	0	1	0	known	polyA	N/A	Dnaj	RAC_head	Myb_DNA-binding*2	N/A	N/A	N/A	N/A	N/A
P62244	Rps15a	40S ribosomal protein S15a	RNA binding|structural constituent of ribosome|poly(A) RNA binding|	cytoplasm|cytosol|membrane|cytosolic small ribosomal subunit|extracellular exosome|	1	0	1	1	1	0	0	0	1	1	known	polyA	N/A	Ribosomal_S8	N/A	N/A	N/A	N/A	N/A	N/A	N/A
P05455	Ssb	Lupus La protein	tRNA binding|nucleotide binding|mRNA binding|protein binding|poly(A) RNA binding|	nucleus|ribonucleoprotein complex|	1	1	1	1	1	1	1	1	1	1	known	polyA	N/A	La	RRM_1	RRM_3	N/A	N/A	N/A	N/A	N/A
P15880	Rps2	40S ribosomal protein S2	mRNA binding|structural constituent of ribosome|protein binding|fibroblast growth factor binding|enzyme binding|poly(A) RNA binding|	nucleus|nucleoplasm|cytoplasm|cytosol|focal adhesion|membrane|cytosolic small ribosomal subunit|extracellular exosome|nucleolus|	1	1	1	1	1	1	0	1	1	1	known	polyA	N/A	Ribosoma_S5	Ribosoma_S5_C	N/A	N/A	N/A	N/A	N/A	N/A
P32969	Rpl9	60S ribosomal protein L9	RNA binding|structural constituent of ribosome|protein binding|rRNA binding|	nucleus|nucleolus|cytoplasm|cytosol|ribosome|focal adhesion|membrane|cytosolic large ribosomal subunit|	0	0	1	0	1	1	0	0	0	1	known	polyA	N/A	Ribosomal_L6*2	N/A	N/A	N/A	N/A	N/A	N/A	N/A
K7ERI7	Rpl22	60S ribosomal protein L22	structural constituent of ribosome|	ribosome|	0	0	0	1	0	1	1	0	1	1	known	polyA	N/A	Ribosomal_L22e	N/A	N/A	N/A	N/A	N/A	N/A	N/A

## Sheet: Tab 2. Column definition
Associated Tabs	Column name	Column definition
1	Uniprot accession	Uniprot accesion IDs for the protein group
	Gene symbol	Gene symbols and synonyms
	Protein name	Protein name
	GO molecular function	The GO molecular function terms. N/A indicates not available.
	GO cellular component	The GO cellular component terms. N/A indicates not available.
	OOPS (Queiroz, R.M.L., et al. Nat. Biotech. 2019)	The RBPs identified by OOPS in Queiroz, R.M.L., et al. Nat. Biotech. 2019. 1 if yes, 0 if no.
	OligodT pulldown (Queiroz, RML., et al Nat. Biotech. 2019)	The RBPs identified by oligodT pulldown in Queiroz, R.M.L., et al. Nat. Biotech. 2019. 1 if yes, 0 if no.
	XRANX (Trendel J.,et al. Cell. 2019)	The RBPs identified by XRANX in Trendel J.,et al. Cell. 2019. 1 if yes, 0 if no.
	OligodT Pulldown (Baltz AG.,et al. Mol Cell.2012)	The RBPs identified by oligodT pulldown in Baltz AG.,et al. Mol Cell.2012. 1 if yes, 0 if no.
	CARIC (Huang R.,et al. PNAS.2019)	The RBPs identified by CARIC in Huang R.,et al. PNAS.2019. 1 if yes, 0 if no.
	GO RNA binding	The RBPs annotated by GO. 1 if yes, 0 if no.
	SerIC nucleus	The nuclear RBPs identified by SerIC in Conrad T., et al. Nat. Commun. 2016. 1 if yes, 0 if no.
	RBD map (Castello A., et al. Mol Cell. 2016)	The RBPs identified by OligodT based RBD profiling in Castello A., et al. Mol Cell. 2016. 1 if yes, 0 if no.
	OligodT Pulldown (Castello A., et al. Cell. 2012)	The RBPs identified by oligodT pulldown in Castello A., et al. Cell. 2012. 1 if yes, 0 if no.
	OligodT Pulldown (Milek M, et al. Genome Res. 2017)	The RBPs identified by oligodT pulldown in Milek M, et al. Genome Res. 2017. 1 if yes, 0 if no.
	known RBP	The RBPs identified by at least one RBP dataset.
	polyA RBP	The RBPs identified by at least one RBP dataset.
	RNA types	The RBPs with information about the RNA types according to the literature. N/A indicates not available.
	Domain 1	The first domain of RBP. N/A indicates not available.
	Domain 2	The second domain of RBP. N/A indicates not available.
	Domain 3	The third domain of RBP. N/A indicates not available.
	Domain 4	The fourth domain of RBP. N/A indicates not available.
	Domain 5	The fifth domain of RBP. N/A indicates not available.
	Domain 6	The sixth domain of RBP. N/A indicates not available.
	Domain 7	The seventh domain of RBP. N/A indicates not available.
	Domain 8	The eighth domain of RBP. N/A indicates not available.

## Sheet: Tab 3. Table legend
Supplementary Dataset 3. The lists of nucleolar RBPs. The nucleolar RBPs were compared with 10 different RBP datasets. The RBPs identified by at least one dataset were assigned as known RBPs and the remaining ones were assigned as RBP orphans. The RBPs identified by oligodT pulldown based methods are assigned as poly (A) RBPs and the remaining ones are assigned as non-poly (A) RBPs. The types of …
